# Supplementary material
Source: publisher figshare collection journal article supplement (https://karger.figshare.com/ndownloader/files/35887112)
Supplement: Supplementary file 1 [file 35887112]

## Sheet: Familia5_HyM
ID	H5 Avg (log2)	M5 Avg (log2)	Fold Change	ABS FC	P-val	FDR P-val	Abenitez1_P0	Abenitez3_P2	Gene Symbol	Description	Chromosome	Strand	Group	Start	Stop	mRNA Accession	mRNA Source	GO Biological Process Accession	GO Biological Process ID	GO Cellular Component Accession	GO Cellular Component ID	GO Molecular Function Accession	GO Molecular Function ID	Pathway Accession	Pathway Source	Pathway Name	category	locus type	Best_Coverage_TaqMan_Assay
TC0100014617.hg.1	7.72	4.3	10.7	10.7	1	1	7.72	4.3	SLC44A5	solute carrier family 44, member 5	chr1	-	Multiple_Complex	75202131	75611116	NM_001130058; NM_152697; ENST00000370855; ENST00000370859; ENST00000469525; BC028743; BC034580; BC051740; OTTHUMT00000026823; OTTHUMT00000026921; OTTHUMT00000026922; CCDS44164.1; CCDS667.1; hsa_circ_0012960; hsa_circ_0012961; uc001dgt.3; uc001dgu.4; uc057hrg.1	RefSeq; ENSEMBL; GenBank; Havana transcript; ccdsGene; circbase; UCSC Genes	NM_001130058; NM_152697; ENST00000370855; ENST00000370859; ENST00000469525; BC028743; BC034580; BC051740; OTTHUMT00000026823; OTTHUMT00000026921; OTTHUMT00000026922	GO:0006644; GO:0006656; GO:0044281; GO:0046474; GO:0055085	NM_001130058; NM_152697; ENST00000370855; ENST00000370859; ENST00000469525; BC028743; BC034580; BC051740; OTTHUMT00000026823; OTTHUMT00000026921; OTTHUMT00000026922	GO:0005886; GO:0016021; GO:0016020						main	Multiple_Complex	Hs00380528_m1
TC0600007377.hg.1	11.75	8.34	10.63	10.63	1	1	11.75	8.34	HIST1H2BM	histone cluster 1, H2bm	chr6	+	Coding	27815044	27815489	NM_003521; ENST00000621112; BC066244; BC067486; BC067487; BC067488; BC067489; OTTHUMT00000040157; CCDS4629.1; uc003njo.4	RefSeq; ENSEMBL; GenBank; Havana transcript; ccdsGene; UCSC Genes	NM_003521; ENST00000621112; BC066244; BC067486; BC067487; BC067488; BC067489; OTTHUMT00000040157	GO:0006325; GO:0006334	NM_003521; ENST00000621112; BC066244; BC067486; BC067487; BC067488; BC067489; OTTHUMT00000040157	GO:0000786; GO:0005634; GO:0005654; GO:0005737; GO:0070062; GO:0005694	NM_003521; ENST00000621112; BC066244; BC067486; BC067487; BC067488; BC067489; OTTHUMT00000040157	GO:0003677; GO:0046982				main	Coding	Hs00605772_s1
TC0300007255.hg.1	8.8	12.19	-10.48	10.48	1	1	8.8	12.19	CCR3	chemokine (C-C motif) receptor 3	chr3	+	Multiple_Complex	46163604	46266706	NM_001164680; NM_001837; NM_178328; NM_178329; ENST00000357422; ENST00000395940; ENST00000395942; ENST00000452454; ENST00000457243; ENST00000475150; ENST00000484025; ENST00000545097; BC110297; BC130318; BC130320; OTTHUMT00000257380; OTTHUMT00000343882; OTTHUMT00000343883; OTTHUMT00000343884; OTTHUMT00000343885; OTTHUMT00000343886; OTTHUMT00000343887; uc003cpk.2; CCDS2738.1; CCDS54574.1; CCR3.aAug…	RefSeq; ENSEMBL; GenBank; Havana transcript; UCSC Genes; ccdsGene; Ace View; lncRNAWiki; NONCODE			NM_001164680; NM_001837; NM_178328; NM_178329; ENST00000357422; ENST00000395940; ENST00000395942; ENST00000452454; ENST00000457243; ENST00000475150; ENST00000484025; ENST00000545097; BC110297; BC130318; BC130320; OTTHUMT00000257380; OTTHUMT00000343882; OTTHUMT00000343883; OTTHUMT00000343884; OTTHUMT00000343885; OTTHUMT00000343886; OTTHUMT00000343887; uc003cpk.2	GO:0005829; GO:0005886; GO:0005887; GO:0016020; GO:0016021	NM_001164680; NM_001837; NM_178328; NM_178329; ENST00000357422; ENST00000395940; ENST00000395942; ENST00000452454; ENST00000457243; ENST00000475150; ENST00000484025; ENST00000545097; BC110297; BC130318; BC130320; OTTHUMT00000257380; OTTHUMT00000343882; OTTHUMT00000343883; OTTHUMT00000343884; OTTHUMT00000343885; OTTHUMT00000343886; OTTHUMT00000343887; uc003cpk.2	GO:0004950; GO:0005515; GO:0016493; GO:0004871; GO:0004930	NM_001164680; NM_001837; NM_178328; NM_178329; ENST00000357422; ENST00000395940; ENST00000395942; ENST00000452454; ENST00000457243; ENST00000475150; ENST00000484025; ENST00000545097; BC110297; BC130318; BC130320; OTTHUMT00000257380; OTTHUMT00000343882; OTTHUMT00000343883; OTTHUMT00000343884; OTTHUMT00000343885; OTTHUMT00000343886; OTTHUMT00000343887; uc003cpk.2	GenMAPP	GPCRDB_Class_A_Rhodopsin-like; GPCRDB_Other; Peptide_GPCRs	main	Multiple_Complex	Hs00266213_s1
TC0100009341.hg.1	6.06	9.31	-9.52	9.52	1	1	6.06	9.31	KIAA1324	KIAA1324	chr1	+	Multiple_Complex	109113679	109206781	NM_001267048; NM_001284352; NM_001284353; NM_020775; ENST00000369936; ENST00000369938; ENST00000369939; ENST00000457623; ENST00000464345; ENST00000490758; ENST00000526264; ENST00000527501; ENST00000527996; ENST00000529753; ENST00000531664; ENST00000533147; ENST00000533374; ENST00000534476; BC125208; OTTHUMT00000032388; OTTHUMT00000032389; OTTHUMT00000032390; OTTHUMT00000032392; OTTHUMT00000032393…	RefSeq; ENSEMBL; GenBank; Havana transcript; ccdsGene; Ace View; UCSC Genes; lncRNAWiki; NONCODE	NM_001267048; NM_001284352; NM_001284353; NM_020775; ENST00000369936; ENST00000369938; ENST00000369939; ENST00000457623; ENST00000464345; ENST00000490758; ENST00000526264; ENST00000527501; ENST00000527996; ENST00000529753; ENST00000531664; ENST00000533147; ENST00000533374; ENST00000534476; BC125208; OTTHUMT00000032388; OTTHUMT00000032389; OTTHUMT00000032390; OTTHUMT00000032392; OTTHUMT00000032393…	GO:0009267; GO:0016236; GO:0044090; GO:2000786; GO:2001240; GO:0006914			NM_001267048; NM_001284352; NM_001284353; NM_020775; ENST00000369936; ENST00000369938; ENST00000369939; ENST00000457623; ENST00000464345; ENST00000490758; ENST00000526264; ENST00000527501; ENST00000527996; ENST00000529753; ENST00000531664; ENST00000533147; ENST00000533374; ENST00000534476; BC125208; OTTHUMT00000032388; OTTHUMT00000032389; OTTHUMT00000032390; OTTHUMT00000032392; OTTHUMT00000032393…	GO:0044822				main	Multiple_Complex	Hs00381755_m1
TC0100018263.hg.1	6.04	9.21	-9.01	9.01	1	1	6.04	9.21	GSTM1	glutathione S-transferase mu 1	chr1	+	Multiple_Complex	109687796	109693745	NM_000561; NM_146421; ENST00000309851; ENST00000349334; ENST00000369819; ENST00000369823; ENST00000476065; ENST00000490171; BC024005; OTTHUMT00000032151; OTTHUMT00000032152; OTTHUMT00000032153; OTTHUMT00000032154; OTTHUMT00000032162; OTTHUMT00000421367; CCDS809.1; CCDS810.1; hsa_circ_0013464; hsa_circ_0013465; hsa_circ_0013466; uc001dyk.4; uc001dyl.4; uc057jbl.1; uc057jbm.1; uc057jbo.1; uc057jbp.…	RefSeq; ENSEMBL; GenBank; Havana transcript; ccdsGene; circbase; UCSC Genes; lncRNAWiki; NONCODE	NM_000561; NM_146421; ENST00000309851; ENST00000349334; ENST00000369819; ENST00000369823; ENST00000476065; ENST00000490171; BC024005; OTTHUMT00000032151; OTTHUMT00000032152; OTTHUMT00000032153; OTTHUMT00000032154; OTTHUMT00000032162; OTTHUMT00000421367	GO:0006749; GO:0006805; GO:0018916; GO:0042178; GO:0044281; GO:0070458; GO:1901687; GO:0008152	NM_000561; NM_146421; ENST00000309851; ENST00000349334; ENST00000369819; ENST00000369823; ENST00000476065; ENST00000490171; BC024005; OTTHUMT00000032151; OTTHUMT00000032152; OTTHUMT00000032153; OTTHUMT00000032154; OTTHUMT00000032162; OTTHUMT00000421367	GO:0005737; GO:0005829	NM_000561; NM_146421; ENST00000309851; ENST00000349334; ENST00000369819; ENST00000369823; ENST00000476065; ENST00000490171; BC024005; OTTHUMT00000032151; OTTHUMT00000032152; OTTHUMT00000032153; OTTHUMT00000032154; OTTHUMT00000032162; OTTHUMT00000421367	GO:0004364; GO:0019899; GO:0042803; GO:0043295; GO:0016740; GO:0005515	NM_000561; NM_146421; BC024005	HumanCyc	PWY-4061	main	Multiple_Complex	Hs01683722_gH
TC2000009216.hg.1	8.32	11.49	-8.98	8.98	1	1	8.32	11.49	SLPI	secretory leukocyte peptidase inhibitor	chr20	-	Multiple_Complex	45252238	45254565	NM_003064; ENST00000338380; BC020708; OTTHUMT00000080494; CCDS13347.1; hsa_circ_0060534; hsa_circ_0060535; hsa_circ_0060536; hsa_circ_0060537; hsa_circ_0060538; uc002xnm.2	RefSeq; ENSEMBL; GenBank; Havana transcript; ccdsGene; circbase; UCSC Genes	NM_003064; ENST00000338380; BC020708; OTTHUMT00000080494	GO:0006955; GO:0010951; GO:0019731; GO:0032091; GO:0032496; GO:0045071; GO:0045087; GO:0002376; GO:0010466; GO:0042742	NM_003064; ENST00000338380; BC020708; OTTHUMT00000080494	GO:0005615; GO:0031012; GO:0070062; GO:0005576	NM_003064; ENST00000338380; BC020708; OTTHUMT00000080494	GO:0004866; GO:0004867; GO:0005515; GO:0019899; GO:0030414				main	Multiple_Complex	Hs00268204_m1
TC0100013223.hg.1	8.36	5.19	8.97	8.97	1	1	8.36	5.19	RAP1GAP	RAP1 GTPase activating protein	chr1	-	Multiple_Complex	21596215	21669363	NM_001145657; NM_001145658; NM_002885; ENST00000290101; ENST00000317967; ENST00000374757; ENST00000374761; ENST00000374763; ENST00000374765; ENST00000447293; ENST00000464457; ENST00000471600; ENST00000482984; ENST00000495204; ENST00000542643; ENST00000611549; BC035030; BC054490; OTTHUMT00000019759; OTTHUMT00000019760; OTTHUMT00000019761; OTTHUMT00000019762; OTTHUMT00000019832; OTTHUMT00000019920;…	RefSeq; ENSEMBL; GenBank; Havana transcript; ccdsGene; circbase; Ace View; UCSC Genes; lncRNAWiki; NONCODE			NM_001145657; NM_001145658; NM_002885; ENST00000290101; ENST00000317967; ENST00000374757; ENST00000374761; ENST00000374763; ENST00000374765; ENST00000447293; ENST00000464457; ENST00000471600; ENST00000482984; ENST00000495204; ENST00000542643; ENST00000611549; BC035030; BC054490; OTTHUMT00000019759; OTTHUMT00000019760; OTTHUMT00000019761; OTTHUMT00000019762; OTTHUMT00000019832; OTTHUMT00000019920;…	GO:0000139; GO:0005829; GO:0016020; GO:0005794	NM_001145657; NM_001145658; NM_002885; ENST00000290101; ENST00000317967; ENST00000374757; ENST00000374761; ENST00000374763; ENST00000374765; ENST00000447293; ENST00000464457; ENST00000471600; ENST00000482984; ENST00000495204; ENST00000542643; ENST00000611549; BC035030; BC054490; OTTHUMT00000019759; OTTHUMT00000019760; OTTHUMT00000019761; OTTHUMT00000019762; OTTHUMT00000019832; OTTHUMT00000019920;…	GO:0003924; GO:0005096; GO:0005515; GO:0017016; GO:0042803; GO:0030695				main	Multiple_Complex	Hs00937977_m1
TC0400010961.hg.1	14.3	11.26	8.27	8.27	1	1	14.3	11.26	JCHAIN	joining chain of multimeric IgA and IgM	chr4	-	Multiple_Complex	70655541	70681817	NM_144646; ENST00000254801; ENST00000391614; ENST00000470866; ENST00000510437; ENST00000510614; ENST00000543780; BC038982; OTTHUMT00000252160; OTTHUMT00000357228; OTTHUMT00000362606; OTTHUMT00000362607; OTTHUMT00000362608; CCDS3545.1; hsa_circ_0069909; hsa_circ_0069910; IGJ.eAug10; uc003hfn.5; uc062xdd.1; uc062xde.1; uc062xdf.1; uc062xdg.1; uc062xdh.1	RefSeq; ENSEMBL; GenBank; Havana transcript; ccdsGene; circbase; Ace View; UCSC Genes	NM_144646; ENST00000254801; ENST00000391614; ENST00000470866; ENST00000510437; ENST00000510614; ENST00000543780; BC038982; OTTHUMT00000252160; OTTHUMT00000357228; OTTHUMT00000362606; OTTHUMT00000362607; OTTHUMT00000362608	GO:0001895; GO:0002250; GO:0003094; GO:0006955; GO:0019731; GO:0032461; GO:0045087; GO:0060267	NM_144646; ENST00000254801; ENST00000391614; ENST00000470866; ENST00000510437; ENST00000510614; ENST00000543780; BC038982; OTTHUMT00000252160; OTTHUMT00000357228; OTTHUMT00000362606; OTTHUMT00000362607; OTTHUMT00000362608	GO:0005576; GO:0005615; GO:0070062; GO:0071748; GO:0071750; GO:0071751; GO:0071752; GO:0071756; GO:0071757; GO:0072562	NM_144646; ENST00000254801; ENST00000391614; ENST00000470866; ENST00000510437; ENST00000510614; ENST00000543780; BC038982; OTTHUMT00000252160; OTTHUMT00000357228; OTTHUMT00000362606; OTTHUMT00000362607; OTTHUMT00000362608	GO:0003697; GO:0003823; GO:0019862; GO:0031210; GO:0034987; GO:0042803; GO:0042834				main	Multiple_Complex	Hs00950678_g1
TC2000007479.hg.1	12.58	15.62	-8.24	8.24	1	1	12.58	15.62	PI3	peptidase inhibitor 3, skin-derived	chr20	+	Multiple_Complex	45174876	45176544	NM_002638; ENST00000243924; BC010952; OTTHUMT00000079418; CCDS13344.1; hsa_circ_0060531; hsa_circ_0060532; hsa_circ_0060533; uc002xng.4	RefSeq; ENSEMBL; GenBank; Havana transcript; ccdsGene; circbase; UCSC Genes	NM_002638; ENST00000243924; BC010952; OTTHUMT00000079418	GO:0007620; GO:0010951; GO:0010466	NM_002638; ENST00000243924; BC010952; OTTHUMT00000079418	GO:0005578; GO:0070062; GO:0005576	NM_002638; ENST00000243924; BC010952; OTTHUMT00000079418	GO:0004866; GO:0004867; GO:0030414				main	Multiple_Complex	Hs00160066_m1
TC0600007628.hg.1	9.12	6.12	8.02	8.02	1	1	9.12	6.12	C4B	complement component 4B (Chido blood group)	chr6	+	Multiple_Complex	32014762	32035418	ENST00000425700; ENST00000435363; ENST00000461632; ENST00000463249; ENST00000468237; ENST00000468936; ENST00000473957; ENST00000474912; ENST00000478388; ENST00000478438; ENST00000485263; ENST00000485543; ENST00000486992; ENST00000490071; ENST00000496065; ENST00000496560; OTTHUMT00000076368; OTTHUMT00000076369; OTTHUMT00000076370; OTTHUMT00000076371; OTTHUMT00000268775; OTTHUMT00000268776; OTTHUMT…	ENSEMBL; Havana transcript; RefSeq; GenBank; Ace View; ccdsGene; UCSC Genes; circbase; lncRNAWiki; NONCODE			ENST00000425700; ENST00000435363; ENST00000461632; ENST00000463249; ENST00000468237; ENST00000468936; ENST00000473957; ENST00000474912; ENST00000478388; ENST00000478438; ENST00000485263; ENST00000485543; ENST00000486992; ENST00000490071; ENST00000496065; ENST00000496560; OTTHUMT00000076368; OTTHUMT00000076369; OTTHUMT00000076370; OTTHUMT00000076371; OTTHUMT00000268775; OTTHUMT00000268776; OTTHUMT…	GO:0005576; GO:0005615; GO:0005886; GO:0044216; GO:0070062; GO:0072562	ENST00000425700; ENST00000435363; ENST00000461632; ENST00000463249; ENST00000468237; ENST00000468936; ENST00000473957; ENST00000474912; ENST00000478388; ENST00000478438; ENST00000485263; ENST00000485543; ENST00000486992; ENST00000490071; ENST00000496065; ENST00000496560; OTTHUMT00000076368; OTTHUMT00000076369; OTTHUMT00000076370; OTTHUMT00000076371; OTTHUMT00000268775; OTTHUMT00000268776; OTTHUMT…	GO:0001848; GO:0004866; GO:0030246; GO:0005515				main	Multiple_Complex	Hs00416393_g1
TC0600014108.hg.1	9.12	6.12	8.02	8.02	1	1	9.12	6.12	C4A	complement component 4A (Rodgers blood group)	chr6	+	Multiple_Complex	31982024	32002681	NM_001252204; ENST00000428956; ENST00000460060; ENST00000460841; ENST00000463034; ENST00000465724; ENST00000467749; ENST00000467948; ENST00000469975; ENST00000470365; ENST00000471624; ENST00000477424; ENST00000480795; ENST00000483974; ENST00000490663; ENST00000491876; ENST00000496659; ENST00000498271; BC063289; BC144546; BC146673; BC146849; BC151204; BC171786; OTTHUMT00000076364; OTTHUMT000000763…	RefSeq; ENSEMBL; GenBank; Havana transcript; ccdsGene; Ace View; UCSC Genes; lncRNAWiki; NONCODE			NM_001252204; ENST00000428956; ENST00000460060; ENST00000460841; ENST00000463034; ENST00000465724; ENST00000467749; ENST00000467948; ENST00000469975; ENST00000470365; ENST00000471624; ENST00000477424; ENST00000480795; ENST00000483974; ENST00000490663; ENST00000491876; ENST00000496659; ENST00000498271; BC063289; BC144546; BC146673; BC146849; BC151204; BC171786; OTTHUMT00000076364; OTTHUMT000000763…	GO:0005576; GO:0005615; GO:0005886; GO:0070062; GO:0072562	NM_001252204; ENST00000428956; ENST00000460060; ENST00000460841; ENST00000463034; ENST00000465724; ENST00000467749; ENST00000467948; ENST00000469975; ENST00000470365; ENST00000471624; ENST00000477424; ENST00000480795; ENST00000483974; ENST00000490663; ENST00000491876; ENST00000496659; ENST00000498271; BC063289; BC144546; BC146673; BC146849; BC151204; BC171786; OTTHUMT00000076364; OTTHUMT000000763…	GO:0001849; GO:0004866; GO:0005515	NM_001252204; ENST00000428956; ENST00000460060; ENST00000460841; ENST00000463034; ENST00000465724; ENST00000467749; ENST00000467948; ENST00000469975; ENST00000470365; ENST00000471624; ENST00000477424; ENST00000480795; ENST00000483974; ENST00000490663; ENST00000491876; ENST00000496659; ENST00000498271; BC063289; BC144546; BC146673; BC146849; BC151204; BC171786; OTTHUMT00000076364; OTTHUMT000000763…	GenMAPP	Complement_Activation_Classical	main	Multiple_Complex	Hs00416393_g1
TC0600007991.hg.1	5.34	8.28	-7.66	7.66	1	1	5.34	8.28	TREML4	triggering receptor expressed on myeloid cells-like 4	chr6	+	Coding	41228324	41238882	NM_198153; ENST00000341495; ENST00000448827; ENST00000461240; BC101780; BC105101; BC143652; OTTHUMT00000043873; OTTHUMT00000357834; OTTHUMT00000357835; uc003oqc.3; CCDS34446.1; uc063ojv.1; uc063ojw.1	RefSeq; ENSEMBL; GenBank; Havana transcript; UCSC Genes; ccdsGene	NM_198153; ENST00000341495; ENST00000448827; ENST00000461240; BC101780; BC105101; BC143652; OTTHUMT00000043873; OTTHUMT00000357834; OTTHUMT00000357835; uc003oqc.3	GO:0050776	NM_198153; ENST00000341495; ENST00000448827; ENST00000461240; BC101780; BC105101; BC143652; OTTHUMT00000043873; OTTHUMT00000357834; OTTHUMT00000357835; uc003oqc.3	GO:0005576; GO:0005886	ENST00000341495; ENST00000448827	GO:0005515				main	Coding	Hs01080584_g1
TC0600007006.hg.1	8.42	5.5	7.59	7.59	1	1	8.42	5.5	RNF182	ring finger protein 182	chr6	+	Coding	13924446	13980302	NM_001165032; NM_001165033; NM_001165034; NM_152737; ENST00000420478; ENST00000423553; ENST00000471906; ENST00000488300; ENST00000488763; ENST00000537388; ENST00000537663; ENST00000544682; BC030666; BC050030; OTTHUMT00000039911; OTTHUMT00000039912; OTTHUMT00000039913; OTTHUMT00000356080; OTTHUMT00000356081; CCDS4531.1; uc003nbe.4; uc003nbg.4; uc021ylw.2; uc021ylx.2; uc063lyy.1; uc063lyz.1; uc063l…	RefSeq; ENSEMBL; GenBank; Havana transcript; ccdsGene; UCSC Genes	NM_001165032; NM_001165033; NM_001165034; NM_152737; ENST00000420478; ENST00000423553; ENST00000471906; ENST00000488300; ENST00000488763; ENST00000537388; ENST00000537663; ENST00000544682; BC030666; BC050030; OTTHUMT00000039911; OTTHUMT00000039912; OTTHUMT00000039913; OTTHUMT00000356080; OTTHUMT00000356081	GO:0016567	NM_001165032; NM_001165033; NM_001165034; NM_152737; ENST00000420478; ENST00000423553; ENST00000471906; ENST00000488300; ENST00000488763; ENST00000537388; ENST00000537663; ENST00000544682; BC030666; BC050030; OTTHUMT00000039911; OTTHUMT00000039912; OTTHUMT00000039913; OTTHUMT00000356080; OTTHUMT00000356081	GO:0005737; GO:0016021; GO:0016020	NM_001165032; NM_001165033; NM_001165034; NM_152737; ENST00000420478; ENST00000423553; ENST00000471906; ENST00000488300; ENST00000488763; ENST00000537388; ENST00000537663; ENST00000544682; BC030666; BC050030; OTTHUMT00000039911; OTTHUMT00000039912; OTTHUMT00000039913; OTTHUMT00000356080; OTTHUMT00000356081	GO:0004842; GO:0005515; GO:0008270; GO:0016874; GO:0046872				main	Coding	Hs05045798_s1
TC1100013133.hg.1	14.93	17.83	-7.43	7.43	1	1	14.93	17.83	HBG2; HBG1	hemoglobin, gamma G; hemoglobin, gamma A	chr11	-	Multiple_Complex	5248083	5255165	NM_000184; NM_000559; ENST00000330597; ENST00000336906; ENST00000444587; ENST00000620888; ENST00000632727; BC010913; BC010914; BC020719; BC029387; BC130457; BC130459; OTTHUMT00000142969; OTTHUMT00000142982; OTTHUMT00000487786; CCDS7754.1; CCDS7755.1; hsa_circ_0020959; hsa_circ_0020960; hsa_circ_0020961; hsa_circ_0020962; hsa_circ_0020963; hsa_circ_0020964; hsa_circ_0020965; uc001mah.2; uc001mai.2…	RefSeq; ENSEMBL; GenBank; Havana transcript; ccdsGene; circbase; UCSC Genes; NONCODE	NM_000184; NM_000559; ENST00000330597; ENST00000336906; ENST00000444587; ENST00000620888; ENST00000632727; BC010913; BC010914; BC020719; BC029387; BC130457; BC130459; OTTHUMT00000142969; OTTHUMT00000142982; OTTHUMT00000487786	GO:0007596; GO:0015671; GO:0006810	NM_000184; NM_000559; ENST00000330597; ENST00000336906; ENST00000444587; ENST00000620888; ENST00000632727; BC010913; BC010914; BC020719; BC029387; BC130457; BC130459; OTTHUMT00000142969; OTTHUMT00000142982; OTTHUMT00000487786	GO:0005829; GO:0005833; GO:0072562	NM_000184; NM_000559; ENST00000330597; ENST00000336906; ENST00000444587; ENST00000620888; ENST00000632727; BC010913; BC010914; BC020719; BC029387; BC130457; BC130459; OTTHUMT00000142969; OTTHUMT00000142982; OTTHUMT00000487786	GO:0005344; GO:0005506; GO:0019825; GO:0020037; GO:0046872; GO:0005515				main	Multiple_Complex	Hs00361131_g1
TC0100008631.hg.1	8.3	5.45	7.21	7.21	1	1	8.3	5.45	SGIP1	SH3-domain GRB2-like (endophilin) interacting protein 1	chr1	+	Multiple_Complex	66533383	66751139	NM_001308203; NM_032291; ENST00000237247; ENST00000320161; ENST00000371037; ENST00000371039; ENST00000424320; ENST00000435165; ENST00000468286; ENST00000468570; ENST00000480548; ENST00000483060; ENST00000484988; ENST00000487507; ENST00000493564; ENST00000497055; BC040516; OTTHUMT00000025395; OTTHUMT00000025396; OTTHUMT00000025397; OTTHUMT00000025398; OTTHUMT00000100219; OTTHUMT00000100220; OTTHUM…	RefSeq; ENSEMBL; GenBank; Havana transcript; ccdsGene; circbase; UCSC Genes; lncRNAWiki; NONCODE	NM_001308203; NM_032291; ENST00000237247; ENST00000320161; ENST00000371037; ENST00000371039; ENST00000424320; ENST00000435165; ENST00000468286; ENST00000468570; ENST00000480548; ENST00000483060; ENST00000484988; ENST00000487507; ENST00000493564; ENST00000497055; BC040516; OTTHUMT00000025395; OTTHUMT00000025396; OTTHUMT00000025397; OTTHUMT00000025398; OTTHUMT00000100219; OTTHUMT00000100220; OTTHUM…	GO:0006897; GO:0048260; GO:0097320; GO:0002021; GO:2000253; GO:2000507	NM_001308203; NM_032291; ENST00000237247; ENST00000320161; ENST00000371037; ENST00000371039; ENST00000424320; ENST00000435165; ENST00000468286; ENST00000468570; ENST00000480548; ENST00000483060; ENST00000484988; ENST00000487507; ENST00000493564; ENST00000497055; BC040516; OTTHUMT00000025395; OTTHUMT00000025396; OTTHUMT00000025397; OTTHUMT00000025398; OTTHUMT00000100219; OTTHUMT00000100220; OTTHUM…	GO:0005737; GO:0005886; GO:0005905; GO:0030122; GO:0030136; GO:0016020	NM_001308203; NM_032291; ENST00000237247; ENST00000320161; ENST00000371037; ENST00000371039; ENST00000424320; ENST00000435165; ENST00000468286; ENST00000468570; ENST00000480548; ENST00000483060; ENST00000484988; ENST00000487507; ENST00000493564; ENST00000497055; BC040516; OTTHUMT00000025395; OTTHUMT00000025396; OTTHUMT00000025397; OTTHUMT00000025398; OTTHUMT00000100219; OTTHUMT00000100220; OTTHUM…	GO:0005515; GO:0005543; GO:0008017; GO:0017124; GO:0015631				main	Multiple_Complex	Hs00998287_m1
TC1200006779.hg.1	11.44	14.12	-6.43	6.43	1	1	11.44	14.12	CLEC12A	C-type lectin domain family 12, member A	chr12	+	Multiple_Complex	9951316	9995694	NM_001207010; NM_001300730; NM_138337; NM_201623; ENST00000304361; ENST00000350667; ENST00000355690; ENST00000396507; ENST00000434319; ENST00000449959; ENST00000543839; BC063424; BC126289; BC126291; OTTHUMT00000399544; OTTHUMT00000399545; OTTHUMT00000399546; OTTHUMT00000399547; OTTHUMT00000399548; OTTHUMT00000399549; OTTHUMT00000399552; uc001qwq.3; CCDS55803.1; CCDS73442.1; CCDS8608.1; CCDS8609.1…	RefSeq; ENSEMBL; GenBank; Havana transcript; UCSC Genes; ccdsGene; lncRNAWiki; NONCODE			NM_001207010; NM_001300730; NM_138337; NM_201623; ENST00000304361; ENST00000350667; ENST00000355690; ENST00000396507; ENST00000434319; ENST00000449959; ENST00000543839; BC063424; BC126289; BC126291; OTTHUMT00000399544; OTTHUMT00000399545; OTTHUMT00000399546; OTTHUMT00000399547; OTTHUMT00000399548; OTTHUMT00000399549; OTTHUMT00000399552; uc001qwq.3	GO:0005886; GO:0016021; GO:0016020	NM_001207010; NM_001300730; NM_138337; NM_201623; ENST00000304361; ENST00000350667; ENST00000355690; ENST00000396507; ENST00000434319; ENST00000449959; ENST00000543839; BC063424; BC126289; BC126291; OTTHUMT00000399544; OTTHUMT00000399545; OTTHUMT00000399546; OTTHUMT00000399547; OTTHUMT00000399548; OTTHUMT00000399549; OTTHUMT00000399552; uc001qwq.3	GO:0030246				main	Multiple_Complex	Hs00370621_m1
TC0100014081.hg.1	9.76	12.41	-6.28	6.28	1	1	9.76	12.41	PDZK1IP1	PDZK1 interacting protein 1	chr1	-	Multiple_Complex	47183589	47191044	NM_005764; ENST00000294338; ENST00000371885; ENST00000489919; ENST00000491793; BC012303; OTTHUMT00000021655; OTTHUMT00000021656; OTTHUMT00000021657; OTTHUMT00000091333; CCDS546.1; uc001cqw.4; uc057ghj.1; uc057ghk.1; uc057ghl.1; NONHSAT003060; NONHSAT003061	RefSeq; ENSEMBL; GenBank; Havana transcript; ccdsGene; UCSC Genes; lncRNAWiki; NONCODE			NM_005764; ENST00000294338; ENST00000371885; ENST00000489919; ENST00000491793; BC012303; OTTHUMT00000021655; OTTHUMT00000021656; OTTHUMT00000021657; OTTHUMT00000091333	GO:0016021; GO:0070062; GO:0016020						main	Multiple_Complex	Hs00906696_m1
TC0400008287.hg.1	11.59	9.05	5.84	5.84	1	1	11.59	9.05	CISD2	CDGSH iron sulfur domain 2	chr4	+	Coding	102868978	102892806	NM_001008388; ENST00000273986; ENST00000503643; ENST00000574446; BC032300; OTTHUMT00000363417; OTTHUMT00000363418; OTTHUMT00000438201; CCDS34040.1; uc003hwt.5; uc062ypx.1; uc062ypy.1	RefSeq; ENSEMBL; GenBank; Havana transcript; ccdsGene; UCSC Genes	NM_001008388; ENST00000273986; ENST00000503643; ENST00000574446; BC032300; OTTHUMT00000363417; OTTHUMT00000363418; OTTHUMT00000438201	GO:0000422; GO:0010259; GO:0010506; GO:0006914	NM_001008388; ENST00000273986; ENST00000503643; ENST00000574446; BC032300; OTTHUMT00000363417; OTTHUMT00000363418; OTTHUMT00000438201	GO:0005741; GO:0005783; GO:0005789; GO:0016020; GO:0016021; GO:0043234; GO:0005739; GO:0043231	NM_001008388; ENST00000273986; ENST00000503643; ENST00000574446; BC032300; OTTHUMT00000363417; OTTHUMT00000363418; OTTHUMT00000438201	GO:0005515; GO:0042803; GO:0044822; GO:0046872; GO:0051537; GO:0051536				main	Coding	Hs00928075_m1
TC0100015815.hg.1	8.64	6.13	5.7	5.7	1	1	8.64	6.13	THEM5	thioesterase superfamily member 5	chr1	-	Coding	151847101	151853697	NM_182578; ENST00000368817; ENST00000453881; BC101610; BC112239; OTTHUMT00000036678; OTTHUMT00000471070; CCDS1005.1; uc021oyw.2; uc057kzk.1	RefSeq; ENSEMBL; GenBank; Havana transcript; ccdsGene; UCSC Genes	NM_182578; ENST00000368817; ENST00000453881; BC101610; BC112239; OTTHUMT00000036678; OTTHUMT00000471070	GO:0006631; GO:0019432; GO:0035336; GO:0035338; GO:0035965; GO:0044255; GO:0044281; GO:0006629	NM_182578; ENST00000368817; ENST00000453881; BC101610; BC112239; OTTHUMT00000036678; OTTHUMT00000471070	GO:0005759; GO:0005739	NM_182578; ENST00000368817; ENST00000453881; BC101610; BC112239; OTTHUMT00000036678; OTTHUMT00000471070	GO:0005515; GO:0016290; GO:0016787				main	Coding	Hs00699477_m1
TC1200011385.hg.1	9	11.49	-5.59	5.59	1	1	9	11.49	LIN7A	lin-7 homolog A (C. elegans)	chr12	-	Multiple_Complex	80792520	80937925	NM_004664; ENST00000261203; ENST00000549417; ENST00000552093; ENST00000552864; BC099921; BC118609; BC122561; OTTHUMT00000407760; OTTHUMT00000407761; OTTHUMT00000407762; OTTHUMT00000407763; CCDS9021.1; LIN7A.cAug10; uc001szi.4; uc058rix.1; uc058riy.1; uc058riz.1; NONHSAT029682	RefSeq; ENSEMBL; GenBank; Havana transcript; ccdsGene; Ace View; UCSC Genes; lncRNAWiki; NONCODE	NM_004664; ENST00000261203; ENST00000549417; ENST00000552093; ENST00000552864; BC099921; BC118609; BC122561; OTTHUMT00000407760; OTTHUMT00000407761; OTTHUMT00000407762; OTTHUMT00000407763	GO:0006461; GO:0006887; GO:0007268; GO:0007269; GO:0008105; GO:0015031; GO:0045199; GO:0048489; GO:0048839; GO:1903361; GO:0006810	NM_004664; ENST00000261203; ENST00000549417; ENST00000552093; ENST00000552864; BC099921; BC118609; BC122561; OTTHUMT00000407760; OTTHUMT00000407761; OTTHUMT00000407762; OTTHUMT00000407763	GO:0005886; GO:0005911; GO:0005923; GO:0014069; GO:0016323; GO:0043005; GO:0045202; GO:0045211; GO:0070062; GO:0097025; GO:0016020; GO:0030054	NM_004664; ENST00000261203; ENST00000549417; ENST00000552093; ENST00000552864; BC099921; BC118609; BC122561; OTTHUMT00000407760; OTTHUMT00000407761; OTTHUMT00000407762; OTTHUMT00000407763	GO:0005515; GO:0097016; GO:0030165				main	Multiple_Complex	Hs00952139_m1
TC0900012139.hg.1	5.33	7.8	-5.53	5.53	1	1	5.33	7.8	PGM5	phosphoglucomutase 5	chr9	+	Multiple_Complex	68356899	68531061	NM_021965; ENST00000396392; ENST00000396396; ENST00000431583; ENST00000472639; ENST00000496758; BC033073; OTTHUMT00000052548; OTTHUMT00000052549; OTTHUMT00000052550; OTTHUMT00000316804; OTTHUMT00000316805; uc004agr.3; CCDS6622.2; hsa_circ_0087138; PGM5.cAug10; uc064toc.1; uc064tod.1; uc064tom.1; uc064ton.1; NONHSAT131747	RefSeq; ENSEMBL; GenBank; Havana transcript; UCSC Genes; ccdsGene; circbase; Ace View; lncRNAWiki; NONCODE	NM_021965; ENST00000396392; ENST00000396396; ENST00000431583; ENST00000472639; ENST00000496758; BC033073; OTTHUMT00000052548; OTTHUMT00000052549; OTTHUMT00000052550; OTTHUMT00000316804; OTTHUMT00000316805; uc004agr.3	GO:0005978; GO:0006006; GO:0007155; GO:0019388; GO:0005975; GO:0071704	NM_021965; ENST00000396392; ENST00000396396; ENST00000431583; ENST00000472639; ENST00000496758; BC033073; OTTHUMT00000052548; OTTHUMT00000052549; OTTHUMT00000052550; OTTHUMT00000316804; OTTHUMT00000316805; uc004agr.3	GO:0001725; GO:0005829; GO:0005913; GO:0005914; GO:0005925; GO:0009898; GO:0014704; GO:0016010; GO:0030018; GO:0042383; GO:0043034; GO:0005737; GO:0005856; GO:0005912; GO:0030054; GO:0030055	NM_021965; ENST00000396392; ENST00000396396; ENST00000431583; ENST00000472639; ENST00000496758; BC033073; OTTHUMT00000052548; OTTHUMT00000052549; OTTHUMT00000052550; OTTHUMT00000316804; OTTHUMT00000316805; uc004agr.3	GO:0000287; GO:0004614; GO:0005198; GO:0016868; GO:0046872; GO:0005515	NM_021965	HumanCyc	PWY-5661; PWY-5941; GLYCOCAT-PWY; GLUCOSE1PMETAB-PWY; P61-PWY; PWY-621	main	Multiple_Complex	Hs00222671_m1
TC0100016044.hg.1	10.32	7.86	5.48	5.48	1	1	10.32	7.86	FCRL5	Fc receptor-like 5	chr1	-	Multiple_Complex	157513377	157552520	NM_001195388; NM_031281; ENST00000361835; ENST00000368189; ENST00000368190; ENST00000461387; ENST00000462218; ENST00000481082; ENST00000483875; ENST00000497286; BC101066; BC101067; BC101069; OTTHUMT00000046263; OTTHUMT00000046264; OTTHUMT00000046265; OTTHUMT00000046266; OTTHUMT00000046267; OTTHUMT00000046268; OTTHUMT00000046270; OTTHUMT00000046271; uc001fqu.3; CCDS1165.1; FCRL5.eAug10; FCRL5.fAug…	RefSeq; ENSEMBL; GenBank; Havana transcript; UCSC Genes; ccdsGene; Ace View; circbase; lncRNAWiki; NONCODE	NM_001195388; NM_031281; ENST00000361835; ENST00000368189; ENST00000368190; ENST00000461387; ENST00000462218; ENST00000481082; ENST00000483875; ENST00000497286; BC101066; BC101067; BC101069; OTTHUMT00000046263; OTTHUMT00000046264; OTTHUMT00000046265; OTTHUMT00000046266; OTTHUMT00000046267; OTTHUMT00000046268; OTTHUMT00000046270; OTTHUMT00000046271; uc001fqu.3	GO:0050859; GO:0051280	NM_001195388; NM_031281; ENST00000361835; ENST00000368189; ENST00000368190; ENST00000461387; ENST00000462218; ENST00000481082; ENST00000483875; ENST00000497286; BC101066; BC101067; BC101069; OTTHUMT00000046263; OTTHUMT00000046264; OTTHUMT00000046265; OTTHUMT00000046266; OTTHUMT00000046267; OTTHUMT00000046268; OTTHUMT00000046270; OTTHUMT00000046271; uc001fqu.3	GO:0005886; GO:0016021; GO:0043235; GO:0016020	ENST00000361835; ENST00000368189; ENST00000368190	GO:0005515				main	Multiple_Complex	Hs01064404_m1
TC1200006781.hg.1	6.37	8.81	-5.45	5.45	1	1	6.37	8.81	CLEC12B	C-type lectin domain family 12, member B	chr12	+	Multiple_Complex	10010627	10018800	NM_001129998; NM_205852; ENST00000338896; ENST00000396502; ENST00000535903; ENST00000539155; ENST00000544853; BC136805; BC136806; OTTHUMT00000399553; OTTHUMT00000399554; OTTHUMT00000399561; OTTHUMT00000399562; OTTHUMT00000399563; CCDS44830.1; CCDS8610.1; CLEC12B.gAug10; uc001qwx.3; uc001qwz.3; uc058lbl.1; uc058lbm.1; uc058lbn.1; NONHSAT026859	RefSeq; ENSEMBL; GenBank; Havana transcript; ccdsGene; Ace View; UCSC Genes; lncRNAWiki; NONCODE			NM_001129998; NM_205852; ENST00000338896; ENST00000396502; ENST00000535903; ENST00000539155; ENST00000544853; BC136805; BC136806; OTTHUMT00000399553; OTTHUMT00000399554; OTTHUMT00000399561; OTTHUMT00000399562; OTTHUMT00000399563	GO:0005886; GO:0016021; GO:0016020	NM_001129998; NM_205852; ENST00000338896; ENST00000396502; ENST00000535903; ENST00000539155; ENST00000544853; BC136805; BC136806; OTTHUMT00000399553; OTTHUMT00000399554; OTTHUMT00000399561; OTTHUMT00000399562; OTTHUMT00000399563	GO:0030246				main	Multiple_Complex	Hs01589194_m1
TC0800009885.hg.1	6.17	8.61	-5.44	5.44	1	1	6.17	8.61	NKX3-1	NK3 homeobox 1	chr8	-	Multiple_Complex	23678693	23682937	NM_001256339; NM_006167; NR_046072; ENST00000380871; ENST00000523261; BC074863; BC074864; OTTHUMT00000215141; OTTHUMT00000376053; CCDS59095.1; CCDS6042.1; NKX3-1.aAug10; uc011kzx.3; uc031tao.2; NONHSAT125584	RefSeq; ENSEMBL; GenBank; Havana transcript; ccdsGene; Ace View; UCSC Genes; lncRNAWiki; NONCODE			NM_001256339; NM_006167; NR_046072; ENST00000380871; ENST00000523261; BC074863; BC074864; OTTHUMT00000215141; OTTHUMT00000376053	GO:0005622; GO:0005634	NM_001256339; NM_006167; NR_046072; ENST00000380871; ENST00000523261; BC074863; BC074864; OTTHUMT00000215141; OTTHUMT00000376053	GO:0000976; GO:0000983; GO:0001047; GO:0003700; GO:0004882; GO:0005515; GO:0008134; GO:0008656; GO:0030284; GO:0030295; GO:0030331; GO:0042826; GO:0043565; GO:0043621; GO:0044212; GO:0097162; GO:0003677				main	Multiple_Complex	Hs00171834_m1
TC0200016402.hg.1	10.13	7.73	5.29	5.29	1	1	10.13	7.73	RSAD2	radical S-adenosyl methionine domain containing 2	chr2	+	Multiple_Complex	6877665	6898239	NM_080657; ENST00000382040; ENST00000477834; ENST00000489749; BC017969; OTTHUMT00000206724; OTTHUMT00000323503; OTTHUMT00000323696; CCDS1656.1; uc002qyp.2; uc061gkc.1; uc061gkd.1; NONHSAT068921	RefSeq; ENSEMBL; GenBank; Havana transcript; ccdsGene; UCSC Genes; lncRNAWiki; NONCODE	NM_080657; ENST00000382040; ENST00000477834; ENST00000489749; BC017969; OTTHUMT00000206724; OTTHUMT00000323503; OTTHUMT00000323696	GO:0001503; GO:0008152; GO:0009615; GO:0016032; GO:0019221; GO:0030278; GO:0034157; GO:0034165; GO:0035710; GO:0043367; GO:0045071; GO:0050709; GO:0051607; GO:0060337; GO:2000553; GO:0002376; GO:0045087	NM_080657; ENST00000382040; ENST00000477834; ENST00000489749; BC017969; OTTHUMT00000206724; OTTHUMT00000323503; OTTHUMT00000323696	GO:0005739; GO:0005741; GO:0005743; GO:0005783; GO:0005789; GO:0005794; GO:0005811; GO:0016020	NM_080657; ENST00000382040; ENST00000477834; ENST00000489749; BC017969; OTTHUMT00000206724; OTTHUMT00000323503; OTTHUMT00000323696	GO:0003824; GO:0005515; GO:0043621; GO:0046872; GO:0051539; GO:0051536				main	Multiple_Complex	Hs00369809_m1
TC0700009680.hg.1	7.35	4.97	5.18	5.18	1	1	7.35	4.97	TMEM176A	transmembrane protein 176A	chr7	+	Multiple_Complex	150800403	150805120	NM_018487; ENST00000004103; ENST00000461345; ENST00000462826; ENST00000468689; ENST00000474166; ENST00000475007; ENST00000475536; ENST00000475710; ENST00000481305; ENST00000484928; ENST00000494349; BC008303; OTTHUMT00000350219; OTTHUMT00000350220; OTTHUMT00000350221; OTTHUMT00000350222; OTTHUMT00000350223; OTTHUMT00000350224; OTTHUMT00000350225; OTTHUMT00000350226; OTTHUMT00000350227; OTTHUMT0000…	RefSeq; ENSEMBL; GenBank; Havana transcript; ccdsGene; Ace View; UCSC Genes; lncRNAWiki; NONCODE	NM_018487; ENST00000004103; ENST00000461345; ENST00000462826; ENST00000468689; ENST00000474166; ENST00000475007; ENST00000475536; ENST00000475710; ENST00000481305; ENST00000484928; ENST00000494349; BC008303; OTTHUMT00000350219; OTTHUMT00000350220; OTTHUMT00000350221; OTTHUMT00000350222; OTTHUMT00000350223; OTTHUMT00000350224; OTTHUMT00000350225; OTTHUMT00000350226; OTTHUMT00000350227; OTTHUMT0000…	GO:2001199	NM_018487; ENST00000004103; ENST00000461345; ENST00000462826; ENST00000468689; ENST00000474166; ENST00000475007; ENST00000475536; ENST00000475710; ENST00000481305; ENST00000484928; ENST00000494349; BC008303; OTTHUMT00000350219; OTTHUMT00000350220; OTTHUMT00000350221; OTTHUMT00000350222; OTTHUMT00000350223; OTTHUMT00000350224; OTTHUMT00000350225; OTTHUMT00000350226; OTTHUMT00000350227; OTTHUMT0000…	GO:0016021; GO:0016020	ENST00000484928	GO:0005515				main	Multiple_Complex	Hs00916849_g1
TC0800009437.hg.1	9.03	11.39	-5.13	5.13	1	1	9.03	11.39	DEFA1B; DEFA1; DEFA3	defensin, alpha 1B; defensin, alpha 1; defensin, alpha 3, neutrophil-specific	chr8	-	Coding	6977649	6980092	NM_001042500; NM_001302265; BC069423; BC093791; BC112188; BC119706; OTTHUMT00000315817; NM_004084_2; CCDS34797.1; uc003wqv.2; uc064kbf.1; ENST00000382679; ENST00000382692	RefSeq; GenBank; Havana transcript; ccdsGene; UCSC Genes; ENSEMBL	NM_001042500; NM_001302265; BC069423; BC093791; BC112188; BC119706; OTTHUMT00000315817; ENST00000382679; ENST00000382692	GO:0002227; GO:0006935; GO:0006955; GO:0019731; GO:0030520; GO:0031640; GO:0045087; GO:0050830; GO:0050832; GO:0051607; GO:0006952; GO:0042742	NM_001042500; NM_001302265; BC069423; BC093791; BC112188; BC119706; OTTHUMT00000315817; ENST00000382679; ENST00000382692	GO:0005576; GO:0005615; GO:0005796; GO:0031012; GO:0035578; GO:0070062	BC119706	GO:0003674				main	Coding	Hs00414018_m1
TC0800012381.hg.1	9.03	11.39	-5.13	5.13	1	1	9.03	11.39	DEFA1; DEFA1B	defensin, alpha 1; defensin, alpha 1B	chr8	-	Coding	6996766	6999202	NM_004084; OTTHUMT00000313536; NM_001042500_2; NM_001302265_2; BC069423_2; BC093791_2; BC112188_2; BC119706_2; CCDS43691.1; uc003wqx.2; ENST00000382689	RefSeq; Havana transcript; GenBank; ccdsGene; UCSC Genes; ENSEMBL	NM_004084; OTTHUMT00000313536; ENST00000382689	GO:0002227; GO:0006935; GO:0006955; GO:0019731; GO:0030520; GO:0031640; GO:0045087; GO:0050830; GO:0050832; GO:0051607; GO:0006952; GO:0042742	NM_004084; OTTHUMT00000313536; ENST00000382689	GO:0005576; GO:0005615; GO:0005796; GO:0031012; GO:0035578; GO:0070062						main	Coding	Hs00414018_m1
TC2200007087.hg.1	4.24	6.55	-4.94	4.94	1	1	4.24	6.55	RNF185	Transcript Identified by AceView, Entrez Gene ID(s) 91445	chr22	+	Unassigned	31185629	31186806	RNF185.rAug10-unspliced	Ace View										main	Unassigned	Hs05399428_s1
TC1200012711.hg.1	6.99	9.29	-4.93	4.93	1	1	6.99	9.29	LINC00173	long intergenic non-protein coding RNA 173	chr12	+	NonCoding	116533422	116536723	NR_027345; NR_027346; ENST00000470091; ENST00000477702; ENST00000480237; ENST00000489452; uc001tvy.3; ENST00000470091.1; ENST00000477702.1; ENST00000480237.1; ENST00000489452.1; NCRNA00173.eAug10; OTTHUMT00000349520; OTTHUMT00000349521; OTTHUMT00000349522; OTTHUMT00000349523; uc001tvx.3; uc058tsh.1; uc058tsi.1; lnc-MAP1LC3B2-2:3; lnc-MAP1LC3B2-2:4; lnc-MAP1LC3B2-2:6; NONHSAT030944; NONHSAT030945;…	RefSeq; ENSEMBL; UCSC Genes; lncRNAWiki; Ace View; Havana transcript; NONCODE; lncRNA Db										main	NonCoding	Hs00858479_g1
TC1700012422.hg.1	6.16	3.87	4.9	4.9	1	1	6.16	3.87	GFAP	glial fibrillary acidic protein	chr17	-	Multiple_Complex	44905626	44916937	NM_001131019; NM_001242376; NM_002055; ENST00000253408; ENST00000376990; ENST00000435360; ENST00000585543; ENST00000585728; ENST00000586125; ENST00000586127; ENST00000586793; ENST00000587997; ENST00000588037; ENST00000588316; ENST00000588640; ENST00000588735; ENST00000588957; ENST00000589701; ENST00000590922; ENST00000591327; ENST00000591719; ENST00000591880; ENST00000592320; ENST00000592706; ENS…	RefSeq; ENSEMBL; GenBank; Havana transcript; UCSC Genes; ccdsGene; Ace View; lncRNAWiki; NONCODE					NM_001131019; NM_001242376; NM_002055; ENST00000253408; ENST00000376990; ENST00000435360; ENST00000585543; ENST00000585728; ENST00000586125; ENST00000586127; ENST00000586793; ENST00000587997; ENST00000588037; ENST00000588316; ENST00000588640; ENST00000588735; ENST00000588957; ENST00000589701; ENST00000590922; ENST00000591327; ENST00000591719; ENST00000591880; ENST00000592320; ENST00000592706; ENS…	GO:0005178; GO:0005200; GO:0005515; GO:0019900; GO:0005198				main	Multiple_Complex	Hs00909236_m1
TC0100015856.hg.1	12.73	15.01	-4.84	4.84	1	1	12.73	15.01	S100A12	S100 calcium binding protein A12	chr1	-	Coding	153373705	153375649	NM_005621; ENST00000368737; BC070294; OTTHUMT00000036795; CCDS1037.1; uc001fbr.2	RefSeq; ENSEMBL; GenBank; Havana transcript; ccdsGene; UCSC Genes	NM_005621; ENST00000368737; BC070294; OTTHUMT00000036795	GO:0002548; GO:0006805; GO:0006954; GO:0030593; GO:0031640; GO:0042742; GO:0043123; GO:0043406; GO:0045087; GO:0045576; GO:0050663; GO:0050729; GO:0050832; GO:0051092; GO:0002376	NM_005621; ENST00000368737; BC070294; OTTHUMT00000036795	GO:0005576; GO:0005634; GO:0005737; GO:0005829; GO:0005856; GO:0005886; GO:0016020	NM_005621; ENST00000368737; BC070294; OTTHUMT00000036795	GO:0005507; GO:0005509; GO:0005515; GO:0008270; GO:0050786; GO:0046872				main	Coding	Hs00942835_g1
TC2100007204.hg.1	3.4	5.67	-4.81	4.81	1	1	3.4	5.67	FAM3B	family with sequence similarity 3, member B	chr21	+	Multiple_Complex	41304212	41357727	NM_058186; NM_206964; ENST00000357985; ENST00000398646; ENST00000398647; ENST00000398652; ENST00000479810; ENST00000518236; BC057829; OTTHUMT00000195142; OTTHUMT00000195143; OTTHUMT00000195144; OTTHUMT00000195145; OTTHUMT00000195146; OTTHUMT00000377735; CCDS13671.1; CCDS42930.1; FAM3B.fAug10; uc002yza.3; uc002yzb.2; uc002yzc.2; uc011aeq.3; uc062ahh.1; uc062ahi.1; NONHSAT082247	RefSeq; ENSEMBL; GenBank; Havana transcript; ccdsGene; Ace View; UCSC Genes; lncRNAWiki; NONCODE	NM_058186; NM_206964; ENST00000357985; ENST00000398646; ENST00000398647; ENST00000398652; ENST00000479810; ENST00000518236; BC057829; OTTHUMT00000195142; OTTHUMT00000195143; OTTHUMT00000195144; OTTHUMT00000195145; OTTHUMT00000195146; OTTHUMT00000377735	GO:0006915; GO:0030073	NM_058186; NM_206964; ENST00000357985; ENST00000398646; ENST00000398647; ENST00000398652; ENST00000479810; ENST00000518236; BC057829; OTTHUMT00000195142; OTTHUMT00000195143; OTTHUMT00000195144; OTTHUMT00000195145; OTTHUMT00000195146; OTTHUMT00000377735	GO:0005576; GO:0005615; GO:0005623; GO:0070062; GO:0016020; GO:0016021	NM_058186; NM_206964; ENST00000357985; ENST00000398646; ENST00000398647; ENST00000398652; ENST00000479810; ENST00000518236; BC057829; OTTHUMT00000195142; OTTHUMT00000195143; OTTHUMT00000195144; OTTHUMT00000195145; OTTHUMT00000195146; OTTHUMT00000377735	GO:0005125				main	Multiple_Complex	Hs01123755_m1
TC1600006656.hg.1	8.25	10.46	-4.63	4.63	1	1	8.25	10.46	MMP25	matrix metallopeptidase 25	chr16	+	Multiple_Complex	3046681	3060726	NM_022468; ENST00000336577; ENST00000570755; ENST00000575441; ENST00000612971; OTTHUMT00000437116; OTTHUMT00000437118; OTTHUMT00000437119; BC167800; CCDS10492.1; MMP25.cAug10; uc002cth.4; uc059ptq.1; uc059ptr.1; uc059ptx.1	RefSeq; ENSEMBL; Havana transcript; GenBank; ccdsGene; Ace View; UCSC Genes	NM_022468; ENST00000336577; ENST00000570755; ENST00000575441; ENST00000612971; OTTHUMT00000437116; OTTHUMT00000437118; OTTHUMT00000437119	GO:0006508; GO:0006954; GO:0060022	NM_022468; ENST00000336577; ENST00000570755; ENST00000575441; ENST00000612971; OTTHUMT00000437116; OTTHUMT00000437118; OTTHUMT00000437119	GO:0005578; GO:0005886; GO:0016020; GO:0016021; GO:0031225; GO:0005576; GO:0031012	NM_022468; ENST00000336577; ENST00000570755; ENST00000575441; ENST00000612971; OTTHUMT00000437116; OTTHUMT00000437118; OTTHUMT00000437119	GO:0004222; GO:0005509; GO:0008270; GO:0008233; GO:0008237; GO:0016787; GO:0046872	NM_022468; ENST00000336577; ENST00000570755; ENST00000575441; ENST00000612971; OTTHUMT00000437116; OTTHUMT00000437118; OTTHUMT00000437119	GenMAPP	Matrix_Metalloproteinases	main	Multiple_Complex	Hs00358811_g1
TC0800012382.hg.1	9.06	11.26	-4.59	4.59	1	1	9.06	11.26	DEFA3	defensin, alpha 3, neutrophil-specific	chr8	-	Coding	7015869	7018301	NM_005217; BC027917; OTTHUMT00000206753; BC069423_3; BC093791_3; BC112188_3; BC119706_3; CCDS5962.1; uc003wqz.3; ENST00000327857	RefSeq; GenBank; Havana transcript; ccdsGene; UCSC Genes; ENSEMBL	NM_005217; BC027917; OTTHUMT00000206753; ENST00000327857	GO:0002227; GO:0019731; GO:0030520; GO:0031640; GO:0045087; GO:0050830; GO:0050832; GO:0051607; GO:0006952; GO:0042742; GO:0006935; GO:0006955	NM_005217; BC027917; OTTHUMT00000206753; ENST00000327857	GO:0005576; GO:0005615; GO:0005796; GO:0035578; GO:0070062; GO:0031012	NM_005217; BC027917; OTTHUMT00000206753; ENST00000327857	GO:0003674				main	Coding	Hs00414018_m1
TC1000008881.hg.1	15.45	13.26	4.57	4.57	1	1	15.45	13.26	MXI1	MAX interactor 1, dimerization protein	chr10	+	Multiple_Complex	110207605	110287365	NM_001008541; NM_005962; NM_130439; ENST00000239007; ENST00000332674; ENST00000361248; ENST00000369612; ENST00000393134; ENST00000442296; ENST00000453116; ENST00000460667; ENST00000484030; ENST00000485566; BC012907; BC035128; OTTHUMT00000050313; OTTHUMT00000050314; OTTHUMT00000050315; OTTHUMT00000050316; OTTHUMT00000050317; OTTHUMT00000050318; OTTHUMT00000050319; OTTHUMT00000050320; OTTHUMT000000…	RefSeq; ENSEMBL; GenBank; Havana transcript; UCSC Genes; ccdsGene; Ace View	NM_001008541; NM_005962; NM_130439; ENST00000239007; ENST00000332674; ENST00000361248; ENST00000369612; ENST00000393134; ENST00000442296; ENST00000453116; ENST00000460667; ENST00000484030; ENST00000485566; BC012907; BC035128; OTTHUMT00000050313; OTTHUMT00000050314; OTTHUMT00000050315; OTTHUMT00000050316; OTTHUMT00000050317; OTTHUMT00000050318; OTTHUMT00000050319; OTTHUMT00000050320; OTTHUMT000000…	GO:0000122; GO:0006351; GO:0008285; GO:0042994; GO:0006355	NM_001008541; NM_005962; NM_130439; ENST00000239007; ENST00000332674; ENST00000361248; ENST00000369612; ENST00000393134; ENST00000442296; ENST00000453116; ENST00000460667; ENST00000484030; ENST00000485566; BC012907; BC035128; OTTHUMT00000050313; OTTHUMT00000050314; OTTHUMT00000050315; OTTHUMT00000050316; OTTHUMT00000050317; OTTHUMT00000050318; OTTHUMT00000050319; OTTHUMT00000050320; OTTHUMT000000…	GO:0005634; GO:0005730; GO:0005737	NM_001008541; NM_005962; NM_130439; ENST00000239007; ENST00000332674; ENST00000361248; ENST00000369612; ENST00000393134; ENST00000442296; ENST00000453116; ENST00000460667; ENST00000484030; ENST00000485566; BC012907; BC035128; OTTHUMT00000050313; OTTHUMT00000050314; OTTHUMT00000050315; OTTHUMT00000050316; OTTHUMT00000050317; OTTHUMT00000050318; OTTHUMT00000050319; OTTHUMT00000050320; OTTHUMT000000…	GO:0003677; GO:0003714; GO:0005515; GO:0046983				main	Multiple_Complex	Hs01104977_m1
TC0700013047.hg.1	8.83	6.64	4.56	4.56	1	1	8.83	6.64	TMEM176B	transmembrane protein 176B	chr7	-	Coding	150791285	150801360	NM_001101311; NM_001101312; NM_001101314; NM_014020; ENST00000326442; ENST00000429904; ENST00000434545; ENST00000447204; ENST00000450753; ENST00000492607; BC004358; BC014586; OTTHUMT00000349204; OTTHUMT00000349206; OTTHUMT00000349207; OTTHUMT00000349208; OTTHUMT00000349209; CCDS47746.1; CCDS5908.1; uc003whu.5; uc003whv.5; uc003whw.5; uc022apx.2; uc064jef.1; uc064jeg.1	RefSeq; ENSEMBL; GenBank; Havana transcript; ccdsGene; UCSC Genes	NM_001101311; NM_001101312; NM_001101314; NM_014020; ENST00000326442; ENST00000429904; ENST00000434545; ENST00000447204; ENST00000450753; ENST00000492607; BC004358; BC014586; OTTHUMT00000349204; OTTHUMT00000349206; OTTHUMT00000349207; OTTHUMT00000349208; OTTHUMT00000349209	GO:0009887; GO:0030154; GO:2001199	NM_001101311; NM_001101312; NM_001101314; NM_014020; ENST00000326442; ENST00000429904; ENST00000434545; ENST00000447204; ENST00000450753; ENST00000492607; BC004358; BC014586; OTTHUMT00000349204; OTTHUMT00000349206; OTTHUMT00000349207; OTTHUMT00000349208; OTTHUMT00000349209	GO:0016021; GO:0031965; GO:0005634; GO:0016020	ENST00000447204	GO:0005515				main	Coding	Hs00962650_m1
TC0400009048.hg.1	10.33	12.5	-4.49	4.49	1	1	10.33	12.5	TLR2	toll-like receptor 2	chr4	+	Multiple_Complex	153684253	153706090	NM_003264; ENST00000260010; BC033756; OTTHUMT00000365205; CCDS3784.1; uc063aif.1; NONHSAT098842; NONHSAT098843; NONHSAT098844; NONHSAT098845	RefSeq; ENSEMBL; GenBank; Havana transcript; ccdsGene; UCSC Genes; lncRNAWiki; NONCODE	NM_003264; ENST00000260010; BC033756; OTTHUMT00000365205	GO:0002224; GO:0002238; GO:0002374; GO:0002687; GO:0002730; GO:0002752; GO:0002755; GO:0006915; GO:0006954; GO:0006955; GO:0007165; GO:0007252; GO:0010628; GO:0030177; GO:0031663; GO:0032613; GO:0032695; GO:0032700; GO:0032722; GO:0032728; GO:0032735; GO:0032741; GO:0032755; GO:0032757; GO:0032760; GO:0034123; GO:0034134; GO:0034142; GO:0038123; GO:0038124; GO:0042346; GO:0042495; GO:0042496; GO:…	NM_003264; ENST00000260010; BC033756; OTTHUMT00000365205	GO:0005737; GO:0005794; GO:0005886; GO:0005887; GO:0009897; GO:0009986; GO:0031226; GO:0035354; GO:0035355; GO:0045121; GO:0016020; GO:0016021; GO:0042995; GO:0044297	NM_003264; ENST00000260010; BC033756; OTTHUMT00000365205	GO:0001530; GO:0001875; GO:0004872; GO:0004888; GO:0005515; GO:0008329; GO:0035325; GO:0042497; GO:0042498; GO:0042834; GO:0046982; GO:0070891; GO:0071723				main	Multiple_Complex	Hs01872448_s1
TC0200016511.hg.1	10.14	12.3	-4.47	4.47	1	1	10.14	12.3	IL1RN	interleukin 1 receptor antagonist	chr2	+	Multiple_Complex	113107214	113134016	NM_000577; NM_173841; NM_173842; NM_173843; ENST00000259206; ENST00000354115; ENST00000361779; ENST00000409052; ENST00000409930; ENST00000463073; ENST00000465812; ENST00000472292; ENST00000486167; BC009745; OTTHUMT00000254116; OTTHUMT00000254117; OTTHUMT00000254118; OTTHUMT00000330801; OTTHUMT00000330802; OTTHUMT00000330803; OTTHUMT00000330804; OTTHUMT00000330805; OTTHUMT00000330806; uc002tiy.3; …	RefSeq; ENSEMBL; GenBank; Havana transcript; UCSC Genes; ccdsGene; circbase; lncRNAWiki; NONCODE			NM_000577; NM_173841; NM_173842; NM_173843; ENST00000259206; ENST00000354115; ENST00000361779; ENST00000409052; ENST00000409930; ENST00000463073; ENST00000465812; ENST00000472292; ENST00000486167; BC009745; OTTHUMT00000254116; OTTHUMT00000254117; OTTHUMT00000254118; OTTHUMT00000330801; OTTHUMT00000330802; OTTHUMT00000330803; OTTHUMT00000330804; OTTHUMT00000330805; OTTHUMT00000330806; uc002tiy.3	GO:0005615; GO:0005622; GO:0005737; GO:0005886; GO:0070062; GO:0005576; GO:0031982	NM_000577; NM_173841; NM_173842; NM_173843; ENST00000259206; ENST00000354115; ENST00000361779; ENST00000409052; ENST00000409930; ENST00000463073; ENST00000465812; ENST00000472292; ENST00000486167; BC009745; OTTHUMT00000254116; OTTHUMT00000254117; OTTHUMT00000254118; OTTHUMT00000330801; OTTHUMT00000330802; OTTHUMT00000330803; OTTHUMT00000330804; OTTHUMT00000330805; OTTHUMT00000330806; uc002tiy.3	GO:0005125; GO:0005149; GO:0005150; GO:0005151; GO:0005152; GO:0005515; GO:0045352; GO:0045353				main	Multiple_Complex	Hs00277299_m1
TC0400012018.hg.1	8.16	10.31	-4.43	4.43	1	1	8.16	10.31	GYPB	glycophorin B (MNS blood group)	chr4	-	Multiple_Complex	143996104	144019345	NM_001304382; NM_002100; ENST00000429670; ENST00000502664; ENST00000503255; ENST00000504951; ENST00000505583; ENST00000506516; ENST00000506679; ENST00000507009; ENST00000508618; ENST00000508841; ENST00000510196; ENST00000511198; ENST00000513128; ENST00000513557; ENST00000513677; BC069310; BC121077; BC121078; OTTHUMT00000364791; OTTHUMT00000364792; OTTHUMT00000364793; OTTHUMT00000364794; OTTHUMT00…	RefSeq; ENSEMBL; GenBank; Havana transcript; ccdsGene; Ace View; circbase; UCSC Genes; lncRNAWiki; NONCODE			NM_001304382; NM_002100; ENST00000429670; ENST00000502664; ENST00000503255; ENST00000504951; ENST00000505583; ENST00000506516; ENST00000506679; ENST00000507009; ENST00000508618; ENST00000508841; ENST00000510196; ENST00000511198; ENST00000513128; ENST00000513557; ENST00000513677; BC069310; BC121077; BC121078; OTTHUMT00000364791; OTTHUMT00000364792; OTTHUMT00000364793; OTTHUMT00000364794; OTTHUMT00…	GO:0005886; GO:0005887; GO:0016020; GO:0016021	NM_001304382; NM_002100; ENST00000429670; ENST00000502664; ENST00000503255; ENST00000504951; ENST00000505583; ENST00000506516; ENST00000506679; ENST00000507009; ENST00000508618; ENST00000508841; ENST00000510196; ENST00000511198; ENST00000513128; ENST00000513557; ENST00000513677; BC069310; BC121077; BC121078; OTTHUMT00000364791; OTTHUMT00000364792; OTTHUMT00000364793; OTTHUMT00000364794; OTTHUMT00…	GO:0005515				main	Multiple_Complex	Hs00357784_m1
TC0900007457.hg.1	10.28	12.43	-4.43	4.43	1	1	10.28	12.43	CNTNAP3P2; CNTNAP3	contactin associated protein-like 3 pseudogene 2; contactin associated protein-like 3	chr9	+	Multiple_Complex	67059450	67294592	NR_111893; ENST00000617175; hsa_circ_0087108; hsa_circ_0087109; hsa_circ_0087110; hsa_circ_0087112; NONHSAT131232; NONHSAT131234; NONHSAT131368; NONHSAT147678; NONHSAT147679; OTTHUMT00000476798	RefSeq; ENSEMBL; circbase; lncRNAWiki; NONCODE; Havana transcript	ENST00000617175	GO:0007155; GO:0008037	ENST00000617175	GO:0005576; GO:0005886; GO:0016021; GO:0016020						main	Multiple_Complex	Hs00276736_m1
TC0300012807.hg.1	13.87	11.74	4.39	4.39	1	1	13.87	11.74	SIAH2	siah E3 ubiquitin protein ligase 2	chr3	-	Multiple_Complex	150741123	150763477	NM_005067; ENST00000312960; ENST00000472885; ENST00000482706; BC013082; OTTHUMT00000357697; OTTHUMT00000357698; OTTHUMT00000357699; CCDS3152.1; hsa_circ_0067733; hsa_circ_0067734; SIAH2.dAug10; uc003eyi.4; uc062pba.1; uc062pbc.1; NONHSAT092711	RefSeq; ENSEMBL; GenBank; Havana transcript; ccdsGene; circbase; Ace View; UCSC Genes; lncRNAWiki; NONCODE	NM_005067; ENST00000312960; ENST00000472885; ENST00000482706; BC013082; OTTHUMT00000357697; OTTHUMT00000357698; OTTHUMT00000357699	GO:0006511; GO:0007049; GO:0007264; GO:0007411; GO:0031396; GO:0042787; GO:0043066; GO:0043154; GO:0043161; GO:0044257; GO:0090090; GO:1903507; GO:2001237; GO:0006915; GO:0007275; GO:0016567	NM_005067; ENST00000312960; ENST00000472885; ENST00000482706; BC013082; OTTHUMT00000357697; OTTHUMT00000357698; OTTHUMT00000357699	GO:0005654; GO:0005737; GO:0005769; GO:0005829; GO:0043005; GO:0043025; GO:0043231; GO:0005634	NM_005067; ENST00000312960; ENST00000472885; ENST00000482706; BC013082; OTTHUMT00000357697; OTTHUMT00000357698; OTTHUMT00000357699	GO:0003714; GO:0005515; GO:0008270; GO:0016874; GO:0031624; GO:0061630; GO:0004842; GO:0046872				main	Multiple_Complex	Hs00192581_m1
TC0100007243.hg.1	10.8	12.92	-4.37	4.37	1	1	10.8	12.92	ALPL	alkaline phosphatase, liver/bone/kidney	chr1	+	Multiple_Complex	21509365	21578412	NM_000478; NM_001127501; NM_001177520; ENST00000374829; ENST00000374830; ENST00000374832; ENST00000374840; ENST00000468526; ENST00000539907; ENST00000540617; BC021289; BC066116; BC090861; BC110909; BC126165; BC136325; OTTHUMT00000008202; OTTHUMT00000008203; OTTHUMT00000008204; OTTHUMT00000008205; OTTHUMT00000008206; OTTHUMT00000476516; OTTHUMT00000476517; CCDS217.1; CCDS53274.1; CCDS53275.1; hsa_…	RefSeq; ENSEMBL; GenBank; Havana transcript; ccdsGene; circbase; UCSC Genes; NONCODE	NM_000478; NM_001127501; NM_001177520; ENST00000374829; ENST00000374830; ENST00000374832; ENST00000374840; ENST00000468526; ENST00000539907; ENST00000540617; BC021289; BC066116; BC090861; BC110909; BC126165; BC136325; OTTHUMT00000008202; OTTHUMT00000008203; OTTHUMT00000008204; OTTHUMT00000008205; OTTHUMT00000008206; OTTHUMT00000476516; OTTHUMT00000476517	GO:0001501; GO:0001649; GO:0001958; GO:0003006; GO:0016311; GO:0032496; GO:0033280; GO:0046677; GO:0051384; GO:0071407; GO:0071529; GO:0008152; GO:0031214; GO:0006470	NM_000478; NM_001127501; NM_001177520; ENST00000374829; ENST00000374830; ENST00000374832; ENST00000374840; ENST00000468526; ENST00000539907; ENST00000540617; BC021289; BC066116; BC090861; BC110909; BC126165; BC136325; OTTHUMT00000008202; OTTHUMT00000008203; OTTHUMT00000008204; OTTHUMT00000008205; OTTHUMT00000008206; OTTHUMT00000476516; OTTHUMT00000476517	GO:0005578; GO:0005615; GO:0005886; GO:0016020; GO:0016021; GO:0031225; GO:0070062; GO:0065010; GO:0031012	NM_000478; NM_001127501; NM_001177520; ENST00000374829; ENST00000374830; ENST00000374832; ENST00000374840; ENST00000468526; ENST00000539907; ENST00000540617; BC021289; BC066116; BC090861; BC110909; BC126165; BC136325; OTTHUMT00000008202; OTTHUMT00000008203; OTTHUMT00000008204; OTTHUMT00000008205; OTTHUMT00000008206; OTTHUMT00000476516; OTTHUMT00000476517	GO:0004035; GO:0005515; GO:0016462; GO:0046872; GO:0003824; GO:0016787; GO:0016791				main	Multiple_Complex	Hs01029142_m1
TC1900011255.hg.1	10.78	12.9	-4.35	4.35	1	1	10.78	12.9	SIGLEC10	sialic acid binding Ig-like lectin 10	chr19	-	Multiple_Complex	51410021	51417803	NM_001171156; NM_001171157; NM_001171158; NM_001171159; NM_001171161; NM_033130; ENST00000339313; ENST00000353836; ENST00000357375; ENST00000436984; ENST00000439889; ENST00000441969; ENST00000442846; ENST00000524527; ENST00000525998; ENST00000529627; ENST00000530476; BC101725; BC143497; BC143500; OTTHUMT00000384614; OTTHUMT00000384615; OTTHUMT00000384616; OTTHUMT00000384617; OTTHUMT00000384618; O…	RefSeq; ENSEMBL; GenBank; Havana transcript; UCSC Genes; ccdsGene	NM_001171156; NM_001171157; NM_001171158; NM_001171159; NM_001171161; NM_033130; ENST00000339313; ENST00000353836; ENST00000357375; ENST00000436984; ENST00000439889; ENST00000441969; ENST00000442846; ENST00000524527; ENST00000525998; ENST00000529627; ENST00000530476; BC101725; BC143497; BC143500; OTTHUMT00000384614; OTTHUMT00000384615; OTTHUMT00000384616; OTTHUMT00000384617; OTTHUMT00000384618; O…	GO:0007155	NM_001171156; NM_001171157; NM_001171158; NM_001171159; NM_001171161; NM_033130; ENST00000339313; ENST00000353836; ENST00000357375; ENST00000436984; ENST00000439889; ENST00000441969; ENST00000442846; ENST00000524527; ENST00000525998; ENST00000529627; ENST00000530476; BC101725; BC143497; BC143500; OTTHUMT00000384614; OTTHUMT00000384615; OTTHUMT00000384616; OTTHUMT00000384617; OTTHUMT00000384618; O…	GO:0005576; GO:0005886; GO:0016021; GO:0016020	NM_001171156; NM_001171157; NM_001171158; NM_001171159; NM_001171161; NM_033130; ENST00000339313; ENST00000353836; ENST00000357375; ENST00000436984; ENST00000439889; ENST00000441969; ENST00000442846; ENST00000524527; ENST00000525998; ENST00000529627; ENST00000530476; BC101725; BC143497; BC143500; OTTHUMT00000384614; OTTHUMT00000384615; OTTHUMT00000384616; OTTHUMT00000384617; OTTHUMT00000384618; O…	GO:0030246; GO:0005515				main	Multiple_Complex	Hs00263976_m1
TC0100016983.hg.1	11.18	13.29	-4.32	4.32	1	1	11.18	13.29	CHI3L1	chitinase 3-like 1 (cartilage glycoprotein-39)	chr1	-	Multiple_Complex	203178931	203186794	NM_001276; ENST00000255409; ENST00000404436; ENST00000472064; ENST00000473185; ENST00000478742; BC008568; BC038354; BC039132; OTTHUMT00000100265; OTTHUMT00000100266; OTTHUMT00000100267; OTTHUMT00000100268; OTTHUMT00000101315; CCDS1435.1; uc001gzi.3; uc001gzk.2; uc057oof.1; uc057oog.1; uc057ooh.1; NONHSAT008871; NONHSAT008872; NONHSAT008873; NONHSAT008874	RefSeq; ENSEMBL; GenBank; Havana transcript; ccdsGene; UCSC Genes; lncRNAWiki; NONCODE			NM_001276; ENST00000255409; ENST00000404436; ENST00000472064; ENST00000473185; ENST00000478742; BC008568; BC038354; BC039132; OTTHUMT00000100265; OTTHUMT00000100266; OTTHUMT00000100267; OTTHUMT00000100268; OTTHUMT00000101315	GO:0005576; GO:0005578; GO:0005615; GO:0005737; GO:0005783; GO:0048471; GO:0070062	NM_001276; ENST00000255409; ENST00000404436; ENST00000472064; ENST00000473185; ENST00000478742; BC008568; BC038354; BC039132; OTTHUMT00000100265; OTTHUMT00000100266; OTTHUMT00000100267; OTTHUMT00000100268; OTTHUMT00000101315	GO:0004568; GO:0005201; GO:0008061; GO:0030246; GO:0004553				main	Multiple_Complex	Hs00609695_m1
TC0100009572.hg.1	14.89	12.79	4.31	4.31	1	1	14.89	12.79	FAM46C	family with sequence similarity 46, member C	chr1	+	Coding	117605934	117628389	NM_017709; ENST00000369448; BC036516; BC131726; OTTHUMT00000038424; CCDS896.1; uc001ehe.4	RefSeq; ENSEMBL; GenBank; Havana transcript; ccdsGene; UCSC Genes					NM_017709; ENST00000369448; BC036516; BC131726; OTTHUMT00000038424	GO:0005515				main	Coding	Hs05018650_s1
TC1600011449.hg.1	7.1	5	4.31	4.31	1	1	7.1	5	SPIRE2	spire-type actin nucleation factor 2	chr16	+	NonCoding	89816777	89827965	ENST00000565103; OTTHUMT00000421930; uc059ysv.1; lnc-SPIRE2-1:1; lnc-SPIRE2-1:2; NONHSAT144589; NONHSAT144590; NONHSAT144591; TCONS_00024918; TCONS_00024919	ENSEMBL; Havana transcript; UCSC Genes; lncRNAWiki; NONCODE; lncRNA Db	ENST00000565103; OTTHUMT00000421930	GO:0015031; GO:0016192; GO:0030036; GO:0036089; GO:0040038; GO:0045010; GO:0046907; GO:0051295; GO:0070649; GO:0006810	ENST00000565103; OTTHUMT00000421930	GO:0005829; GO:0005856; GO:0005886; GO:0005938; GO:0030659; GO:0032154; GO:0048471; GO:0005737; GO:0016020; GO:0031410	ENST00000565103; OTTHUMT00000421930	GO:0003779				main	NonCoding	Hs03848463_s1
TC0600012674.hg.1	5.86	3.76	4.28	4.28	1	1	5.86	3.76	ASCC3	Memczak2013 ALT_ACCEPTOR, ALT_DONOR, coding, INTERNAL, intronic best transcript NM_006828	chr6	-	NonCoding	100763317	100763436	hsa_circ_0001631	circbase										main	NonCoding	TaqMan Probe Unavailable
TC2000007514.hg.1	9.62	11.72	-4.28	4.28	1	1	9.62	11.72	MMP9	matrix metallopeptidase 9	chr20	+	Multiple_Complex	46008908	46016561	NM_004994; ENST00000372330; BC006093; OTTHUMT00000080337; uc002xqz.3; CCDS13390.1; hsa_circ_0001161; hsa_circ_0001162; hsa_circ_0060571	RefSeq; ENSEMBL; GenBank; Havana transcript; UCSC Genes; ccdsGene; circbase	NM_004994; ENST00000372330; BC006093; OTTHUMT00000080337; uc002xqz.3	GO:0001501; GO:0001503; GO:0001934; GO:0006508; GO:0007411; GO:0007566; GO:0022617; GO:0030198; GO:0030225; GO:0030574; GO:0035987; GO:0043066; GO:0043388; GO:0045742; GO:0048013; GO:0050900; GO:0051549; GO:0090200; GO:1900122; GO:2001243; GO:2001258; GO:2001268; GO:0043065	NM_004994; ENST00000372330; BC006093; OTTHUMT00000080337; uc002xqz.3	GO:0005576; GO:0005578; GO:0005615; GO:0070062; GO:0031012	NM_004994; ENST00000372330; BC006093; OTTHUMT00000080337; uc002xqz.3	GO:0004175; GO:0004222; GO:0005515; GO:0005518; GO:0008237; GO:0008270; GO:0042802; GO:0008233; GO:0016787; GO:0046872; GO:0005509	NM_004994; ENST00000372330; BC006093; OTTHUMT00000080337; uc002xqz.3	GenMAPP	Matrix_Metalloproteinases	main	Multiple_Complex	Hs00234579_m1
TSUnmapped00000640.hg.1	5.31	7.4	-4.25	4.25	1	1	5.31	7.4	FMN1	formin 1			Coding			ENST00000632025	ENSEMBL	ENST00000632025	GO:0010467; GO:0035136; GO:0035137; GO:0045010; GO:0048705; GO:0048813; GO:0051127; GO:0051894; GO:0072092; GO:0001822; GO:0030838; GO:0060173	ENST00000632025	GO:0005634; GO:0005737; GO:0005884; GO:0005886; GO:0005912; GO:0015630; GO:0016020; GO:0030054	ENST00000632025	GO:0003779; GO:0008017; GO:0017124				main->unmapped	Coding
TC1200012247.hg.1	11.79	13.86	-4.19	4.19	1	1	11.79	13.86	HCAR2	hydroxycarboxylic acid receptor 2	chr12	-	Coding	122701293	122703357	NM_177551; ENST00000328880; BC027965; BC056419; OTTHUMT00000370202; CCDS9235.1; uc001ucx.2	RefSeq; ENSEMBL; GenBank; Havana transcript; ccdsGene; UCSC Genes	NM_177551; ENST00000328880; BC027965; BC056419; OTTHUMT00000370202	GO:0001781; GO:0007186; GO:0033031; GO:0050995; GO:0070165; GO:0006915; GO:0007165	NM_177551; ENST00000328880; BC027965; BC056419; OTTHUMT00000370202	GO:0005886; GO:0016021; GO:0030054; GO:0016020	NM_177551; ENST00000328880; BC027965; BC056419; OTTHUMT00000370202	GO:0070553; GO:0004871; GO:0004930				main	Coding	Hs00271958_s1
TC1400007445.hg.1	7.1	9.12	-4.05	4.05	1	1	7.1	9.12	PLEKHG3	pleckstrin homology domain containing, family G (with RhoGef domain) member 3	chr14	+	Multiple_Complex	64704102	64750247	NM_001308147; ENST00000247226; ENST00000394691; ENST00000471182; ENST00000484731; ENST00000490180; ENST00000492928; ENST00000554088; ENST00000554499; ENST00000555982; ENST00000556801; BC129952; BC129953; OTTHUMT00000073981; OTTHUMT00000073983; OTTHUMT00000073984; OTTHUMT00000412028; OTTHUMT00000412029; OTTHUMT00000412033; OTTHUMT00000413404; OTTHUMT00000413405; OTTHUMT00000413406; OTTHUMT00000413…	RefSeq; ENSEMBL; GenBank; Havana transcript; ccdsGene; circbase; Ace View; UCSC Genes; lncRNAWiki; NONCODE	NM_001308147; ENST00000247226; ENST00000394691; ENST00000471182; ENST00000484731; ENST00000490180; ENST00000492928; ENST00000554088; ENST00000554499; ENST00000555982; ENST00000556801; BC129952; BC129953; OTTHUMT00000073981; OTTHUMT00000073983; OTTHUMT00000073984; OTTHUMT00000412028; OTTHUMT00000412029; OTTHUMT00000412033; OTTHUMT00000413404; OTTHUMT00000413405; OTTHUMT00000413406; OTTHUMT00000413…	GO:0035023; GO:0043547			NM_001308147; ENST00000247226; ENST00000394691; ENST00000471182; ENST00000484731; ENST00000490180; ENST00000492928; ENST00000554088; ENST00000554499; ENST00000555982; ENST00000556801; BC129952; BC129953; OTTHUMT00000073981; OTTHUMT00000073983; OTTHUMT00000073984; OTTHUMT00000412028; OTTHUMT00000412029; OTTHUMT00000412033; OTTHUMT00000413404; OTTHUMT00000413405; OTTHUMT00000413406; OTTHUMT00000413…	GO:0005089				main	Multiple_Complex	Hs01024074_g1
TC1600007531.hg.1	11.85	13.86	-4.04	4.04	1	1	11.85	13.86	ITGAX	integrin alpha X	chr16	+	Multiple_Complex	31355134	31382997	NM_000887; NM_001286375; ENST00000268296; ENST00000562138; ENST00000562522; ENST00000562918; ENST00000564308; ENST00000567409; ENST00000571644; BC038237; OTTHUMT00000255628; OTTHUMT00000432825; OTTHUMT00000432826; OTTHUMT00000432827; OTTHUMT00000432828; OTTHUMT00000432831; OTTHUMT00000438811; CCDS10711.1; CCDS67014.1; hsa_circ_0039159; hsa_circ_0039160; hsa_circ_0039161; ITGAX.iAug10; uc002ebt.5;…	RefSeq; ENSEMBL; GenBank; Havana transcript; ccdsGene; circbase; Ace View; UCSC Genes; Guo; lncRNAWiki; NONCODE	NM_000887; NM_001286375; ENST00000268296; ENST00000562138; ENST00000562522; ENST00000562918; ENST00000564308; ENST00000567409; ENST00000571644; BC038237; OTTHUMT00000255628; OTTHUMT00000432825; OTTHUMT00000432826; OTTHUMT00000432827; OTTHUMT00000432828; OTTHUMT00000432831; OTTHUMT00000438811	GO:0007155; GO:0007229; GO:0007596; GO:0009887; GO:0030198; GO:0034113; GO:0050900; GO:1903955; GO:0051607	NM_000887; NM_001286375; ENST00000268296; ENST00000562138; ENST00000562522; ENST00000562918; ENST00000564308; ENST00000567409; ENST00000571644; BC038237; OTTHUMT00000255628; OTTHUMT00000432825; OTTHUMT00000432826; OTTHUMT00000432827; OTTHUMT00000432828; OTTHUMT00000432831; OTTHUMT00000438811	GO:0005886; GO:0008305; GO:0009986; GO:0016020; GO:0016021; GO:0009897	NM_000887; NM_001286375; ENST00000268296; ENST00000562138; ENST00000562522; ENST00000562918; ENST00000564308; ENST00000567409; ENST00000571644; BC038237; OTTHUMT00000255628; OTTHUMT00000432825; OTTHUMT00000432826; OTTHUMT00000432827; OTTHUMT00000432828; OTTHUMT00000432831; OTTHUMT00000438811	GO:0004872; GO:0005515; GO:0046872	NM_000887; NM_001286375; ENST00000268296; ENST00000562138; ENST00000562522; ENST00000562918; ENST00000564308; ENST00000567409; ENST00000571644; BC038237; OTTHUMT00000255628; OTTHUMT00000432825; OTTHUMT00000432826; OTTHUMT00000432827; OTTHUMT00000432828; OTTHUMT00000432831; OTTHUMT00000438811	GenMAPP	Integrin-mediated_cell_adhesion_KEGG	main	Multiple_Complex	Hs01015072_g1
TC1100007727.hg.1	7.14	5.13	4.03	4.03	1	1	7.14	5.13	FAM111B	family with sequence similarity 111, member B	chr11	+	Multiple_Complex	59107185	59127416	NM_001142703; NM_001142704; NM_198947; ENST00000343597; ENST00000411426; ENST00000528234; ENST00000529618; ENST00000534403; ENST00000620384; BC130513; BC130539; OTTHUMT00000393971; OTTHUMT00000393972; OTTHUMT00000393973; OTTHUMT00000393974; CCDS44611.1; CCDS7972.1; uc001nnl.5; uc001nnm.5; uc010rko.4; uc058bqr.1; uc058bqs.1; uc058bqt.1; NONHSAT021500	RefSeq; ENSEMBL; GenBank; Havana transcript; ccdsGene; UCSC Genes; lncRNAWiki; NONCODE					NM_001142703; NM_001142704; NM_198947; ENST00000343597; ENST00000411426; ENST00000528234; ENST00000529618; ENST00000534403; ENST00000620384; BC130513; BC130539; OTTHUMT00000393971; OTTHUMT00000393972; OTTHUMT00000393973; OTTHUMT00000393974	GO:0005515				main	Multiple_Complex	Hs01941351_s1
TC0700010443.hg.1	7.47	5.48	3.98	3.98	1	1	7.47	5.48	STEAP1B	STEAP family member 1B	chr7	-	Multiple_Complex	22419444	22632925	NM_001164460; NM_207342; ENST00000404369; ENST00000406890; ENST00000424363; ENST00000439708; ENST00000483679; BC066301; OTTHUMT00000326617; OTTHUMT00000326618; OTTHUMT00000326619; OTTHUMT00000326797; OTTHUMT00000326798; CCDS55094.1; CCDS56469.1; hsa_circ_0079559; hsa_circ_0079560; MGC87042.aAug10; uc003svh.4; uc010kum.3; uc064bxm.1; uc064bxn.1; uc064bxo.1; NONHSAT119463	RefSeq; ENSEMBL; GenBank; Havana transcript; ccdsGene; circbase; Ace View; UCSC Genes; lncRNAWiki; NONCODE	NM_001164460; NM_207342; ENST00000404369; ENST00000406890; ENST00000424363; ENST00000439708; ENST00000483679; BC066301; OTTHUMT00000326617; OTTHUMT00000326618; OTTHUMT00000326619; OTTHUMT00000326797; OTTHUMT00000326798	GO:0015677; GO:0055114; GO:0097461	NM_001164460; NM_207342; ENST00000404369; ENST00000406890; ENST00000424363; ENST00000439708; ENST00000483679; BC066301; OTTHUMT00000326617; OTTHUMT00000326618; OTTHUMT00000326619; OTTHUMT00000326797; OTTHUMT00000326798	GO:0005768; GO:0005887; GO:0005886; GO:0016020; GO:0016021	NM_001164460; NM_207342; ENST00000404369; ENST00000406890; ENST00000424363; ENST00000439708; ENST00000483679; BC066301; OTTHUMT00000326617; OTTHUMT00000326618; OTTHUMT00000326619; OTTHUMT00000326797; OTTHUMT00000326798	GO:0008823; GO:0052851				main	Multiple_Complex	Hs03649371_mH
TC1000008399.hg.1	9.41	7.44	3.93	3.93	1	1	9.41	7.44	IFIT1B	interferon-induced protein with tetratricopeptide repeats 1B	chr10	+	Coding	89378056	89385205	NM_001010987; ENST00000371809; BC137368; BC137369; BC150189; OTTHUMT00000049296; uc001kgh.3; CCDS31242.1; IFIT1B.aAug10	RefSeq; ENSEMBL; GenBank; Havana transcript; UCSC Genes; ccdsGene; Ace View	NM_001010987; ENST00000371809; BC137368; BC137369; BC150189; OTTHUMT00000049296; uc001kgh.3	GO:0051607; GO:0060337	NM_001010987; ENST00000371809; BC137368; BC137369; BC150189; OTTHUMT00000049296; uc001kgh.3	GO:0005829	NM_001010987; ENST00000371809; BC137368; BC137369; BC150189; OTTHUMT00000049296; uc001kgh.3	GO:0003723; GO:0005515				main	Coding	Hs01128267_s1
TC2200009219.hg.1	14.12	12.14	3.93	3.93	1	1	14.12	12.14	IGLL5; MIR5571; IGLC1; IGLC2; IGLV2-5; IGLV3-1; IGLJ1	immunoglobulin lambda-like polypeptide 5; microRNA 5571; immunoglobulin lambda constant 1 (Mcg marker); immunoglobulin lambda constant 2 (Kern-Oz- marker); immunoglobulin lambda variable 2-5 (pseudogene); immunoglobulin lambda variable 3-1; immunoglobulin lambda joining 1	chr22	+	Multiple_Complex	22856545	22901437	NM_001178126; NM_001256296; NR_049835; ENST00000526893; ENST00000531372; ENST00000532223; ENST00000577998; ENST00000610541; ENST00000612695; ENST00000613777; ENST00000616131; ENST00000617866; ENST00000617880; ENST00000620657; ENST00000620665; BC012159; OTTHUMT00000321818; OTTHUMT00000321820; OTTHUMT00000321822; OTTHUMT00000321828; OTTHUMT00000321829; OTTHUMT00000385698; OTTHUMT00000385699; OTTHUM…	RefSeq; ENSEMBL; GenBank; Havana transcript; ccdsGene; circbase; UCSC Genes; RNACentral; NONCODE; lncRNAWiki	NM_001178126; NM_001256296; ENST00000526893; ENST00000531372; ENST00000532223; ENST00000610541; ENST00000612695; ENST00000613777; ENST00000616131; ENST00000617866; ENST00000617880; ENST00000620657; ENST00000620665; BC012159; OTTHUMT00000321818; OTTHUMT00000321822; OTTHUMT00000385698; OTTHUMT00000385699; OTTHUMT00000385700	GO:0006898; GO:0006910; GO:0006911; GO:0006958; GO:0038095; GO:0038096; GO:0042742; GO:0045087; GO:0050853; GO:0050871; GO:0006855; GO:0006955; GO:0006956; GO:0050776	NM_001178126; NM_001256296; ENST00000526893; ENST00000531372; ENST00000532223; ENST00000610541; ENST00000612695; ENST00000613777; ENST00000616131; ENST00000617866; ENST00000617880; ENST00000620657; ENST00000620665; BC012159; OTTHUMT00000321818; OTTHUMT00000321822; OTTHUMT00000385698; OTTHUMT00000385699; OTTHUMT00000385700	GO:0009897; GO:0042571; GO:0070062; GO:0072562; GO:0005576; GO:0005615; GO:0005886	NM_001178126; NM_001256296; ENST00000526893; ENST00000531372; ENST00000532223; ENST00000610541; ENST00000612695; ENST00000613777; ENST00000616131; ENST00000617866; ENST00000617880; ENST00000620657; ENST00000620665; BC012159; OTTHUMT00000321818; OTTHUMT00000321822; OTTHUMT00000385698; OTTHUMT00000385699; OTTHUMT00000385700	GO:0003823; GO:0034987; GO:0005515				main	Multiple_Complex	Hs00382306_m1
TC0400011994.hg.1	5.18	7.15	-3.92	3.92	1	1	5.18	7.15	INPP4B	inositol polyphosphate-4-phosphatase type II B	chr4	-	Multiple_Complex	142023160	142847432	NM_001101669; NM_003866; ENST00000262992; ENST00000503927; ENST00000504632; ENST00000505483; ENST00000506000; ENST00000506217; ENST00000506243; ENST00000506297; ENST00000506517; ENST00000506788; ENST00000507462; ENST00000507861; ENST00000508084; ENST00000508116; ENST00000509777; ENST00000510812; ENST00000511838; ENST00000512489; ENST00000512630; ENST00000513000; ENST00000514525; ENST00000514964; …	RefSeq; ENSEMBL; GenBank; Havana transcript; ccdsGene; circbase; Ace View; UCSC Genes; lncRNAWiki; NONCODE			NM_001101669; NM_003866; ENST00000262992; ENST00000503927; ENST00000504632; ENST00000505483; ENST00000506000; ENST00000506217; ENST00000506243; ENST00000506297; ENST00000506517; ENST00000506788; ENST00000507462; ENST00000507861; ENST00000508084; ENST00000508116; ENST00000509777; ENST00000510812; ENST00000511838; ENST00000512489; ENST00000512630; ENST00000513000; ENST00000514525; ENST00000514964; …	GO:0005829; GO:0005623; GO:0016020; GO:0016021; GO:0005737; GO:0005794						main	Multiple_Complex	Hs01038086_m1
TC0100007813.hg.1	4.59	6.54	-3.85	3.85	1	1	4.59	6.54	CSF3R	Memczak2013 ANTISENSE, CDS, coding, INTERNAL best transcript NM_156039	chr1	+	NonCoding	36473796	36475464	hsa_circ_0000055	circbase										main	NonCoding	Hs05276875_s1
TC0500012978.hg.1	9.09	11.04	-3.84	3.84	1	1	9.09	11.04	DOK3	docking protein 3	chr5	-	Multiple_Complex	177501905	177511274	NM_001144875; NM_001144876; NM_001308235; NM_001308236; NM_024872; ENST00000312943; ENST00000357198; ENST00000377112; ENST00000500323; ENST00000501403; ENST00000502380; ENST00000502885; ENST00000506493; ENST00000509310; ENST00000510380; ENST00000510389; ENST00000510898; ENST00000512660; BC004564; OTTHUMT00000253420; OTTHUMT00000373142; OTTHUMT00000373143; OTTHUMT00000373144; OTTHUMT00000373145; O…	RefSeq; ENSEMBL; GenBank; Havana transcript; UCSC Genes; ccdsGene; lncRNAWiki; NONCODE	NM_001144875; NM_001144876; NM_001308235; NM_001308236; NM_024872; ENST00000312943; ENST00000357198; ENST00000377112; ENST00000500323; ENST00000501403; ENST00000502380; ENST00000502885; ENST00000506493; ENST00000509310; ENST00000510380; ENST00000510389; ENST00000510898; ENST00000512660; BC004564; OTTHUMT00000253420; OTTHUMT00000373142; OTTHUMT00000373143; OTTHUMT00000373144; OTTHUMT00000373145; O…	GO:0007265	NM_001144875; NM_001144876; NM_001308235; NM_001308236; NM_024872; ENST00000312943; ENST00000357198; ENST00000377112; ENST00000500323; ENST00000501403; ENST00000502380; ENST00000502885; ENST00000506493; ENST00000509310; ENST00000510380; ENST00000510389; ENST00000510898; ENST00000512660; BC004564; OTTHUMT00000253420; OTTHUMT00000373142; OTTHUMT00000373143; OTTHUMT00000373144; OTTHUMT00000373145; O…	GO:0005737; GO:0005886; GO:0016020	NM_001144875; NM_001144876; NM_001308235; NM_001308236; NM_024872; ENST00000312943; ENST00000357198; ENST00000377112; ENST00000500323; ENST00000501403; ENST00000502380; ENST00000502885; ENST00000506493; ENST00000509310; ENST00000510380; ENST00000510389; ENST00000510898; ENST00000512660; BC004564; OTTHUMT00000253420; OTTHUMT00000373142; OTTHUMT00000373143; OTTHUMT00000373144; OTTHUMT00000373145; O…	GO:0005158; GO:0005515				main	Multiple_Complex	Hs01032538_m1
TC1100009514.hg.1	8.48	10.42	-3.83	3.83	1	1	8.48	10.42	TMEM45B	transmembrane protein 45B	chr11	+	Multiple_Complex	129815819	129860003	NM_138788; ENST00000281441; ENST00000524567; ENST00000525709; ENST00000527754; ENST00000529381; BC016153; OTTHUMT00000386058; OTTHUMT00000386059; OTTHUMT00000386060; OTTHUMT00000386061; OTTHUMT00000386062; CCDS8482.1; hsa_circ_0024846; uc001qfe.2; uc001qff.2; uc058jbs.1; uc058jbt.1; uc058jbu.1; NONHSAT025103; NONHSAT025104	RefSeq; ENSEMBL; GenBank; Havana transcript; ccdsGene; circbase; UCSC Genes; lncRNAWiki; NONCODE			NM_138788; ENST00000281441; ENST00000524567; ENST00000525709; ENST00000527754; ENST00000529381; BC016153; OTTHUMT00000386058; OTTHUMT00000386059; OTTHUMT00000386060; OTTHUMT00000386061; OTTHUMT00000386062	GO:0016021; GO:0016020						main	Multiple_Complex	Hs00431154_m1
TC0300008506.hg.1	5.95	4.02	3.81	3.81	1	1	5.95	4.02	LRRC58	Memczak2013 ANTISENSE, CDS, coding, INTERNAL, intronic, UTR3 best transcript NM_001099678	chr3	+	NonCoding	120327878	120334219	hsa_circ_0001331	circbase										main	NonCoding	Hs05416147_s1
TC0500012205.hg.1	9.24	7.32	3.8	3.8	1	1	9.24	7.32	MZB1	marginal zone B and B1 cell-specific protein	chr5	-	Multiple_Complex	139387480	139390081	NM_016459; ENST00000302125; ENST00000417694; ENST00000503120; ENST00000503351; ENST00000503481; ENST00000509591; ENST00000511979; ENST00000513389; BC009931; BC021275; OTTHUMT00000373054; OTTHUMT00000373055; OTTHUMT00000373056; OTTHUMT00000373057; OTTHUMT00000373058; OTTHUMT00000373059; OTTHUMT00000373060; OTTHUMT00000373061; CCDS47273.1; uc003lei.4; uc010jfe.4; uc063hqw.1; uc063hqx.1; uc063hqy.1;…	RefSeq; ENSEMBL; GenBank; Havana transcript; ccdsGene; UCSC Genes; lncRNAWiki; NONCODE	NM_016459; ENST00000302125; ENST00000417694; ENST00000503120; ENST00000503351; ENST00000503481; ENST00000509591; ENST00000511979; ENST00000513389; BC009931; BC021275; OTTHUMT00000373054; OTTHUMT00000373055; OTTHUMT00000373056; OTTHUMT00000373057; OTTHUMT00000373058; OTTHUMT00000373059; OTTHUMT00000373060; OTTHUMT00000373061	GO:0002642; GO:0006915; GO:0008284; GO:0030888; GO:0033622; GO:0042127; GO:2001274	NM_016459; ENST00000302125; ENST00000417694; ENST00000503120; ENST00000503351; ENST00000503481; ENST00000509591; ENST00000511979; ENST00000513389; BC009931; BC021275; OTTHUMT00000373054; OTTHUMT00000373055; OTTHUMT00000373056; OTTHUMT00000373057; OTTHUMT00000373058; OTTHUMT00000373059; OTTHUMT00000373060; OTTHUMT00000373061	GO:0005576; GO:0005737; GO:0005788; GO:0034663; GO:0005783	NM_016459; ENST00000302125; ENST00000417694; ENST00000503120; ENST00000503351; ENST00000503481; ENST00000509591; ENST00000511979; ENST00000513389; BC009931; BC021275; OTTHUMT00000373054; OTTHUMT00000373055; OTTHUMT00000373056; OTTHUMT00000373057; OTTHUMT00000373058; OTTHUMT00000373059; OTTHUMT00000373060; OTTHUMT00000373061	GO:0005515				main	Multiple_Complex	Hs03005634_g1
TC0100010514.hg.1	9.29	11.21	-3.79	3.79	1	1	9.29	11.21	MPZL1	myelin protein zero-like 1	chr1	+	Multiple_Complex	167721192	167791919	NM_001146191; NM_003953; NM_024569; ENST00000359523; ENST00000367853; ENST00000392121; ENST00000403379; ENST00000448405; ENST00000464954; ENST00000465787; ENST00000474729; ENST00000474859; ENST00000487858; ENST00000498279; BC007881; OTTHUMT00000083655; OTTHUMT00000083656; OTTHUMT00000083657; OTTHUMT00000083658; OTTHUMT00000326410; OTTHUMT00000326411; OTTHUMT00000326412; OTTHUMT00000326413; OTTHUM…	RefSeq; ENSEMBL; GenBank; Havana transcript; UCSC Genes; ccdsGene; circbase; Ace View; lncRNAWiki; NONCODE	NM_001146191; NM_003953; NM_024569; ENST00000359523; ENST00000367853; ENST00000392121; ENST00000403379; ENST00000448405; ENST00000464954; ENST00000465787; ENST00000474729; ENST00000474859; ENST00000487858; ENST00000498279; BC007881; OTTHUMT00000083655; OTTHUMT00000083656; OTTHUMT00000083657; OTTHUMT00000083658; OTTHUMT00000326410; OTTHUMT00000326411; OTTHUMT00000326412; OTTHUMT00000326413; OTTHUM…	GO:0007169; GO:0007267; GO:0007165	NM_001146191; NM_003953; NM_024569; ENST00000359523; ENST00000367853; ENST00000392121; ENST00000403379; ENST00000448405; ENST00000464954; ENST00000465787; ENST00000474729; ENST00000474859; ENST00000487858; ENST00000498279; BC007881; OTTHUMT00000083655; OTTHUMT00000083656; OTTHUMT00000083657; OTTHUMT00000083658; OTTHUMT00000326410; OTTHUMT00000326411; OTTHUMT00000326412; OTTHUMT00000326413; OTTHUM…	GO:0005887; GO:0005925; GO:0009986; GO:0016020; GO:0016021	NM_001146191; NM_003953; NM_024569; ENST00000359523; ENST00000367853; ENST00000392121; ENST00000403379; ENST00000448405; ENST00000464954; ENST00000465787; ENST00000474729; ENST00000474859; ENST00000487858; ENST00000498279; BC007881; OTTHUMT00000083655; OTTHUMT00000083656; OTTHUMT00000083657; OTTHUMT00000083658; OTTHUMT00000326410; OTTHUMT00000326411; OTTHUMT00000326412; OTTHUMT00000326413; OTTHUM…	GO:0005198; GO:0005515				main	Multiple_Complex	Hs01555360_g1
TC1200012248.hg.1	11.95	13.87	-3.79	3.79	1	1	11.95	13.87	HCAR3	hydroxycarboxylic acid receptor 3	chr12	-	Coding	122714756	122716892	NM_006018; ENST00000528880; BC047891; uc001ucy.4; CCDS53842.1; OTTHUMT00000387549	RefSeq; ENSEMBL; GenBank; UCSC Genes; ccdsGene; Havana transcript	NM_006018; ENST00000528880; BC047891; uc001ucy.4; OTTHUMT00000387549	GO:0007186; GO:0007165	NM_006018; ENST00000528880; BC047891; uc001ucy.4; OTTHUMT00000387549	GO:0005886; GO:0005887; GO:0030054; GO:0016020; GO:0016021	NM_006018; ENST00000528880; BC047891; uc001ucy.4; OTTHUMT00000387549	GO:0004930; GO:0004871	NM_006018; ENST00000528880; BC047891; uc001ucy.4	GenMAPP	GPCRDB_Class_A_Rhodopsin-like2	main	Coding	Hs00271959_s1
TC0600014235.hg.1	10.43	8.51	3.78	3.78	1	1	10.43	8.51	BLOC1S5-TXNDC5	BLOC1S5-TXNDC5 readthrough (NMD candidate)	chr6	-	Multiple_Complex	7881250	8064414	NR_037616; BC052310; OTTHUMT00000413472; EEF1E1andMUTEDandTXNDC5.bAug10; hsa_circ_0075595; uc063lrr.1; uc063lrt.1; ENST00000439343; ENST00000539054; NR_037616.1:1..3352:ncRNA	RefSeq; GenBank; Havana transcript; Ace View; circbase; UCSC Genes; ENSEMBL; RNACentral	NR_037616; BC052310; ENST00000439343; ENST00000539054	GO:0006457; GO:0006892; GO:0008152; GO:0034976; GO:0043066; GO:0043277; GO:0045454; GO:0061024; GO:0016197	NR_037616; BC052310; OTTHUMT00000413472; ENST00000439343; ENST00000539054	GO:0005783; GO:0005788; GO:0043202; GO:0070062; GO:0005623; GO:0030133; GO:0031083	NR_037616; BC052310; ENST00000539054	GO:0003756; GO:0005515; GO:0016853				main	Multiple_Complex	Hs00229373_m1
TC0200008663.hg.1	12.03	13.95	-3.77	3.77	1	1	12.03	13.95	IL1R2	interleukin 1 receptor, type II	chr2	+	Multiple_Complex	101991844	102028544	NM_001261419; NM_004633; NR_048564; ENST00000332549; ENST00000393414; ENST00000441002; ENST00000457817; ENST00000464994; ENST00000474085; ENST00000482658; ENST00000485335; ENST00000493749; BC039031; OTTHUMT00000253191; OTTHUMT00000339984; OTTHUMT00000339985; OTTHUMT00000339986; OTTHUMT00000339987; OTTHUMT00000339988; OTTHUMT00000339989; OTTHUMT00000339990; OTTHUMT00000339991; CCDS2054.1; CCDS5871…	RefSeq; ENSEMBL; GenBank; Havana transcript; ccdsGene; Ace View; UCSC Genes; lncRNAWiki; NONCODE	NM_001261419; NM_004633; NR_048564; ENST00000332549; ENST00000393414; ENST00000441002; ENST00000457817; ENST00000464994; ENST00000474085; ENST00000482658; ENST00000485335; ENST00000493749; BC039031; OTTHUMT00000253191; OTTHUMT00000339984; OTTHUMT00000339985; OTTHUMT00000339986; OTTHUMT00000339987; OTTHUMT00000339988; OTTHUMT00000339989; OTTHUMT00000339990; OTTHUMT00000339991	GO:0006955; GO:0019221	NM_001261419; NM_004633; NR_048564; ENST00000332549; ENST00000393414; ENST00000441002; ENST00000457817; ENST00000464994; ENST00000474085; ENST00000482658; ENST00000485335; ENST00000493749; BC039031; OTTHUMT00000253191; OTTHUMT00000339984; OTTHUMT00000339985; OTTHUMT00000339986; OTTHUMT00000339987; OTTHUMT00000339988; OTTHUMT00000339989; OTTHUMT00000339990; OTTHUMT00000339991	GO:0005576; GO:0005886; GO:0016021; GO:0016020	NM_001261419; NM_004633; NR_048564; ENST00000332549; ENST00000393414; ENST00000441002; ENST00000457817; ENST00000464994; ENST00000474085; ENST00000482658; ENST00000485335; ENST00000493749; BC039031; OTTHUMT00000253191; OTTHUMT00000339984; OTTHUMT00000339985; OTTHUMT00000339986; OTTHUMT00000339987; OTTHUMT00000339988; OTTHUMT00000339989; OTTHUMT00000339990; OTTHUMT00000339991	GO:0004908; GO:0004910; GO:0005515				main	Multiple_Complex	Hs01030384_m1
TC0800009095.hg.1	4.93	6.84	-3.77	3.77	1	1	4.93	6.84	DENND3	Memczak2013 ALT_ACCEPTOR, ALT_DONOR, coding, INTERNAL, intronic best transcript NM_014957	chr8	+	NonCoding	141128988	141129166	hsa_circ_0001827; hsa_circ_0001828	circbase										main	NonCoding	Hs05516817_s1
TC0800012026.hg.1	7.97	9.88	-3.76	3.76	1	1	7.97	9.88	SLC45A4	solute carrier family 45, member 4	chr8	-	Multiple_Complex	141207166	141308305	NM_001080431; NM_001286646; NM_001286648; ENST00000024061; ENST00000517878; ENST00000519067; ENST00000519986; ENST00000520137; ENST00000521804; BC157840; OTTHUMT00000378571; OTTHUMT00000378931; OTTHUMT00000378932; OTTHUMT00000378939; OTTHUMT00000378940; OTTHUMT00000378941; BC160000; CCDS34948.1; CCDS69550.1; CCDS75795.1; ENST00000517658.1; hsa_circ_0001829; hsa_circ_0085791; hsa_circ_0085792; hsa…	RefSeq; ENSEMBL; GenBank; Havana transcript; ccdsGene; lncRNAWiki; circbase; Ace View; UCSC Genes; Guo; RNACentral; NONCODE; lncRNA Db	NM_001080431; NM_001286646; NM_001286648; ENST00000024061; ENST00000517878; ENST00000519067; ENST00000519986; ENST00000520137; ENST00000521804; BC157840; OTTHUMT00000378571; OTTHUMT00000378931; OTTHUMT00000378932; OTTHUMT00000378939; OTTHUMT00000378940; OTTHUMT00000378941	GO:0006810	NM_001080431; NM_001286646; NM_001286648; ENST00000024061; ENST00000517878; ENST00000519067; ENST00000519986; ENST00000520137; ENST00000521804; BC157840; OTTHUMT00000378571; OTTHUMT00000378931; OTTHUMT00000378932; OTTHUMT00000378939; OTTHUMT00000378940; OTTHUMT00000378941	GO:0016021; GO:0016020						main	Multiple_Complex	Hs01088147_m1
TC0900012157.hg.1	9.42	7.51	3.75	3.75	1	1	9.42	7.51	AKAP2	A kinase (PRKA) anchor protein 2	chr9	+	Multiple_Complex	110048598	110172512	NM_001004065; NM_001136562; NM_001198656; ENST00000259318; ENST00000374525; ENST00000434623; ENST00000471798; ENST00000480388; ENST00000482335; ENST00000485762; ENST00000495980; BC146863; BC171800; OTTHUMT00000053607; OTTHUMT00000053609; OTTHUMT00000053610; OTTHUMT00000053613; OTTHUMT00000346067; OTTHUMT00000356276; OTTHUMT00000356277; OTTHUMT00000356278; CCDS43861.1; CCDS48003.1; CCDS56581.1; hs…	RefSeq; ENSEMBL; GenBank; Havana transcript; ccdsGene; circbase; Ace View; UCSC Genes; Guo; lncRNAWiki; NONCODE	NM_001004065; NM_001136562; NM_001198656; ENST00000259318; ENST00000374525; ENST00000434623; ENST00000471798; ENST00000480388; ENST00000482335; ENST00000485762; ENST00000495980; BC146863; BC171800; OTTHUMT00000053607; OTTHUMT00000053609; OTTHUMT00000053610; OTTHUMT00000053613; OTTHUMT00000346067; OTTHUMT00000356276; OTTHUMT00000356277; OTTHUMT00000356278	GO:0008360; GO:0016310	NM_001004065; NM_001136562; NM_001198656; ENST00000259318; ENST00000374525; ENST00000434623; ENST00000471798; ENST00000480388; ENST00000482335; ENST00000485762; ENST00000495980; BC146863; BC171800; OTTHUMT00000053607; OTTHUMT00000053609; OTTHUMT00000053610; OTTHUMT00000053613; OTTHUMT00000346067; OTTHUMT00000356276; OTTHUMT00000356277; OTTHUMT00000356278	GO:0005886; GO:0016020	NM_001004065; NM_001136562; NM_001198656; ENST00000259318; ENST00000374525; ENST00000434623; ENST00000471798; ENST00000480388; ENST00000482335; ENST00000485762; ENST00000495980; BC146863; BC171800; OTTHUMT00000053607; OTTHUMT00000053609; OTTHUMT00000053610; OTTHUMT00000053613; OTTHUMT00000346067; OTTHUMT00000356276; OTTHUMT00000356277; OTTHUMT00000356278	GO:0016301	NM_001004065; NM_001136562; NM_001198656; ENST00000259318; ENST00000374525; ENST00000434623; ENST00000471798; ENST00000480388; ENST00000482335; ENST00000485762; ENST00000495980; BC146863; BC171800; OTTHUMT00000053607; OTTHUMT00000053609; OTTHUMT00000053610; OTTHUMT00000053613; OTTHUMT00000346067; OTTHUMT00000356276; OTTHUMT00000356277; OTTHUMT00000356278	GenMAPP	G_Protein_Signaling	main	Multiple_Complex	Hs00200512_m1
TC1100010398.hg.1	5.97	4.06	3.75	3.75	1	1	5.97	4.06	CCDC34	Transcript Identified by AceView, Entrez Gene ID(s) 91057	chr11	-	Unassigned	27334215	27334717	CCDC34.eAug10-unspliced	Ace View										main	Unassigned	Hs05396019_s1
TC0300010082.hg.1	10.64	12.54	-3.73	3.73	1	1	10.64	12.54	FAM157A	family with sequence similarity 157, member A	chr3	+	Multiple_Complex	198152366	198199015	NM_001145248; ENST00000431569.1; ENST00000437428.2; FAM157A.aAug10; hsa_circ_0068775; OTTHUMT00000340078; uc062shh.1; uc062shi.1; ENST00000431569; ENST00000437428; ENST00000615155; HG496629.2:1..1141:ncRNA; hsa_circ_0068776; NONHSAT094493; OTTHUMT00000475154	RefSeq; lncRNAWiki; Ace View; circbase; Havana transcript; UCSC Genes; ENSEMBL; RNACentral; NONCODE										main	Multiple_Complex	Hs05027087_m1
TC0X00008881.hg.1	5.09	6.99	-3.72	3.72	1	1	5.09	6.99	SPRY3	sprouty RTK signaling antagonist 3	chrX	+	Coding	155612565	155782459	NM_001304990; NM_005840; ENST00000302805; BC069609; BC074972; BC074973; OTTHUMT00000058823; CCDS14769.4; uc004fnq.2	RefSeq; ENSEMBL; GenBank; Havana transcript; ccdsGene; UCSC Genes	NM_001304990; NM_005840; ENST00000302805; BC069609; BC074972; BC074973; OTTHUMT00000058823	GO:0007275; GO:0009966; GO:0061564	NM_001304990; NM_005840; ENST00000302805; BC069609; BC074972; BC074973; OTTHUMT00000058823	GO:0005737; GO:0016020	NM_001304990; NM_005840; ENST00000302805; BC069609; BC074972; BC074973; OTTHUMT00000058823	GO:0003674				main	Coding	Hs00538856_m1
TC0Y00006855.hg.1	5.09	6.99	-3.72	3.72	1	1	5.09	6.99	SPRY3	Homo sapiens sprouty RTK signaling antagonist 3 (SPRY3), transcript variant 1, mRNA.; sprouty homolog 3 (Drosophila) [Source:HGNC Symbol;Acc:HGNC:11271]; Homo sapiens sprouty homolog 3 (Drosophila), mRNA (cDNA clone MGC:97072 IMAGE:7262284), complete cds.; Homo sapiens sprouty homolog 3 (Drosophila), mRNA (cDNA clone MGC:103904 IMAGE:30915293), complete cds.; Homo sapiens sprouty homolog 3 (Droso…	chrY	+	Coding	56954255	56968979	NM_005840_2; ENSTR0000302805; BC069609_2; BC074972_2; BC074973_2; CCDS14769.4_2; uc004fxi.2	RefSeq; ENSEMBL; GenBank; ccdsGene; UCSC Genes										main	Coding	Hs00538856_m1
TC1900011847.hg.1	7.67	9.56	-3.72	3.72	1	1	7.67	9.56	LRG1	leucine-rich alpha-2-glycoprotein 1	chr19	-	Multiple_Complex	4536409	4540474	NM_052972; ENST00000306390; ENST00000586883; BC034389; BC070198; OTTHUMT00000458654; OTTHUMT00000458655; CCDS12130.1; hsa_circ_0048634; uc002mau.4; uc060rxy.1	RefSeq; ENSEMBL; GenBank; Havana transcript; ccdsGene; circbase; UCSC Genes	NM_052972; ENST00000306390; ENST00000586883; BC034389; BC070198; OTTHUMT00000458654; OTTHUMT00000458655	GO:0001938; GO:0030511; GO:0045766; GO:0050873; GO:0008150	NM_052972; ENST00000306390; ENST00000586883; BC034389; BC070198; OTTHUMT00000458654; OTTHUMT00000458655	GO:0005576; GO:0005615; GO:0016020; GO:0070062	NM_052972; ENST00000306390; ENST00000586883; BC034389; BC070198; OTTHUMT00000458654; OTTHUMT00000458655	GO:0005160; GO:0003674; GO:0005515				main	Multiple_Complex	Hs00364835_m1
TSUnmapped00000113.hg.1	6.62	8.52	-3.72	3.72	1	1	6.62	8.52	PADI4	peptidyl arginine deiminase, type IV			Coding			ENST00000626048	ENSEMBL	ENST00000626048	GO:0006325; GO:0006334; GO:0006338; GO:0006351; GO:0006355; GO:0006464; GO:0016568; GO:0018101; GO:0019827; GO:0036413; GO:0036414; GO:0045087; GO:0002376	ENST00000626048	GO:0005634; GO:0005654; GO:0005737	ENST00000626048	GO:0004668; GO:0005509; GO:0005515; GO:0016990; GO:0016787; GO:0046872				main->unmapped	Coding
TC1100008477.hg.1	12.47	14.36	-3.7	3.7	1	1	12.47	14.36	DGAT2	diacylglycerol O-acyltransferase 2	chr11	+	Multiple_Complex	75759512	75801536	NM_001253891; NM_032564; ENST00000228027; ENST00000376262; ENST00000603276; ENST00000603363; ENST00000603865; ENST00000604733; ENST00000604935; ENST00000605099; ENST00000605608; BC015234; OTTHUMT00000383504; OTTHUMT00000383505; OTTHUMT00000383506; OTTHUMT00000383507; OTTHUMT00000383508; OTTHUMT00000383509; OTTHUMT00000383510; OTTHUMT00000383511; CCDS31642.1; CCDS58162.1; hsa_circ_0023631; hsa_cir…	RefSeq; ENSEMBL; GenBank; Havana transcript; ccdsGene; circbase; UCSC Genes; lncRNAWiki; NONCODE					NM_001253891; NM_032564; ENST00000228027; ENST00000376262; ENST00000603276; ENST00000603363; ENST00000603865; ENST00000604733; ENST00000604935; ENST00000605099; ENST00000605608; BC015234; OTTHUMT00000383504; OTTHUMT00000383505; OTTHUMT00000383506; OTTHUMT00000383507; OTTHUMT00000383508; OTTHUMT00000383509; OTTHUMT00000383510; OTTHUMT00000383511	GO:0003846; GO:0004144; GO:0042803; GO:0050252; GO:0016740; GO:0016746; GO:0016747	NM_032564; BC015234	HumanCyc	TRIGLSYN-PWY	main	Multiple_Complex	Hs01045909_g1
TC1600006940.hg.1	7.06	5.18	3.7	3.7	1	1	7.06	5.18	TNFRSF17	tumor necrosis factor receptor superfamily, member 17	chr16	+	Multiple_Complex	11965107	11968068	NM_001192; ENST00000053243; ENST00000396495; ENST00000562385; BC058291; OTTHUMT00000252062; OTTHUMT00000421523; OTTHUMT00000421524; uc002dbv.3; CCDS10552.1; hsa_circ_0037913; TNFRSF17.dAug10; uc010buz.4; uc059qyi.1	RefSeq; ENSEMBL; GenBank; Havana transcript; UCSC Genes; ccdsGene; circbase; Ace View	NM_001192; ENST00000053243; ENST00000396495; ENST00000562385; BC058291; OTTHUMT00000252062; OTTHUMT00000421523; OTTHUMT00000421524; uc002dbv.3	GO:0002250; GO:0002260; GO:0007165; GO:0007275; GO:0008283; GO:0033209; GO:0002376	NM_001192; ENST00000053243; ENST00000396495; ENST00000562385; BC058291; OTTHUMT00000252062; OTTHUMT00000421523; OTTHUMT00000421524; uc002dbv.3	GO:0005886; GO:0012505; GO:0016021; GO:0016020	NM_001192; ENST00000053243; ENST00000396495; ENST00000562385; BC058291; OTTHUMT00000252062; OTTHUMT00000421523; OTTHUMT00000421524; uc002dbv.3	GO:0004872				main	Multiple_Complex	Hs01113645_m1
TC1700012482.hg.1	5.8	7.68	-3.69	3.69	1	1	5.8	7.68	SIRT7	sirtuin 7	chr17	-	Multiple_Complex	81911939	81918194	NM_016538; ENST00000328666; ENST00000536038; ENST00000570367; ENST00000571213; ENST00000571233; ENST00000571832; ENST00000571915; ENST00000572350; ENST00000572671; ENST00000572976; ENST00000573367; ENST00000573576; ENST00000574153; ENST00000574495; ENST00000574915; ENST00000574992; ENST00000575244; ENST00000575360; ENST00000576156; ENST00000577065; BC017305; BC101791; BC101793; OTTHUMT00000439957…	RefSeq; ENSEMBL; GenBank; Havana transcript; ccdsGene; circbase; UCSC Genes; lncRNAWiki; NONCODE			NM_016538; ENST00000328666; ENST00000536038; ENST00000570367; ENST00000571213; ENST00000571233; ENST00000571832; ENST00000571915; ENST00000572350; ENST00000572671; ENST00000572976; ENST00000573367; ENST00000573576; ENST00000574153; ENST00000574495; ENST00000574915; ENST00000574992; ENST00000575244; ENST00000575360; ENST00000576156; ENST00000577065; BC017305; BC101791; BC101793; OTTHUMT00000439957…	GO:0005730; GO:0005731; GO:0005737; GO:0005634	NM_016538; ENST00000328666; ENST00000536038; ENST00000570367; ENST00000571213; ENST00000571233; ENST00000571832; ENST00000571915; ENST00000572350; ENST00000572671; ENST00000572976; ENST00000573367; ENST00000573576; ENST00000574153; ENST00000574495; ENST00000574915; ENST00000574992; ENST00000575244; ENST00000575360; ENST00000576156; ENST00000577065; BC017305; BC101791; BC101793; OTTHUMT00000439957…	GO:0003682; GO:0005515; GO:0046872; GO:0070403; GO:0097372; GO:0016787				main	Multiple_Complex	Hs01034683_g1
TC0700009232.hg.1	13.8	11.92	3.67	3.67	1	1	13.8	11.92	BPGM	2,3-bisphosphoglycerate mutase	chr7	+	Coding	134646779	134679815	NM_001293085; NM_001724; NM_199186; ENST00000344924; ENST00000393132; ENST00000418040; ENST00000443095; BC017050; OTTHUMT00000339761; OTTHUMT00000339762; OTTHUMT00000339763; OTTHUMT00000339764; CCDS5833.1; uc003vrv.4; uc003vrw.4; uc064ife.1; uc064iff.1	RefSeq; ENSEMBL; GenBank; Havana transcript; ccdsGene; UCSC Genes	NM_001293085; NM_001724; NM_199186; ENST00000344924; ENST00000393132; ENST00000418040; ENST00000443095; BC017050; OTTHUMT00000339761; OTTHUMT00000339762; OTTHUMT00000339763; OTTHUMT00000339764	GO:0005975; GO:0006094; GO:0006096; GO:0007585; GO:0016311; GO:0043456; GO:0008152; GO:0006470; GO:0048821	NM_001293085; NM_001724; NM_199186; ENST00000344924; ENST00000393132; ENST00000418040; ENST00000443095; BC017050; OTTHUMT00000339761; OTTHUMT00000339762; OTTHUMT00000339763; OTTHUMT00000339764	GO:0005829; GO:0070062	NM_001293085; NM_001724; NM_199186; ENST00000344924; ENST00000393132; ENST00000418040; ENST00000443095; BC017050; OTTHUMT00000339761; OTTHUMT00000339762; OTTHUMT00000339763; OTTHUMT00000339764	GO:0004082; GO:0004083; GO:0046538; GO:0003824; GO:0004619; GO:0016787; GO:0016853; GO:0016868	NM_001724; BC017050	HumanCyc	GLYCOLYSIS; P106-PWY; ANAGLYCOLYSIS-PWY; PWY-5484; GLUCONEO-PWY	main	Coding	Hs00156139_m1
TC1100007826.hg.1	8.19	10.06	-3.67	3.67	1	1	8.19	10.06	BEST1	bestrophin 1	chr11	+	Multiple_Complex	61949821	61965515	NM_001139443; NM_001300786; NM_001300787; NM_004183; ENST00000378043; ENST00000449131; ENST00000524877; ENST00000524926; ENST00000526988; ENST00000529265; ENST00000533521; ENST00000534553; BC015220; BC041664; OTTHUMT00000394715; OTTHUMT00000394716; OTTHUMT00000394717; OTTHUMT00000394718; OTTHUMT00000394719; OTTHUMT00000394720; OTTHUMT00000394721; OTTHUMT00000394722; BEST1.aAug10; BEST1.kAug10; CC…	RefSeq; ENSEMBL; GenBank; Havana transcript; Ace View; ccdsGene; circbase; UCSC Genes; lncRNAWiki; NONCODE	NM_001139443; NM_001300786; NM_001300787; NM_004183; ENST00000378043; ENST00000449131; ENST00000524877; ENST00000524926; ENST00000526988; ENST00000529265; ENST00000533521; ENST00000534553; BC015220; BC041664; OTTHUMT00000394715; OTTHUMT00000394716; OTTHUMT00000394717; OTTHUMT00000394718; OTTHUMT00000394719; OTTHUMT00000394720; OTTHUMT00000394721; OTTHUMT00000394722	GO:0006821; GO:0007601; GO:0030321; GO:0034220; GO:0050908; GO:0051924; GO:0055085; GO:1902476; GO:0006810; GO:0006811; GO:0050896	NM_001139443; NM_001300786; NM_001300787; NM_004183; ENST00000378043; ENST00000449131; ENST00000524877; ENST00000524926; ENST00000526988; ENST00000529265; ENST00000533521; ENST00000534553; BC015220; BC041664; OTTHUMT00000394715; OTTHUMT00000394716; OTTHUMT00000394717; OTTHUMT00000394718; OTTHUMT00000394719; OTTHUMT00000394720; OTTHUMT00000394721; OTTHUMT00000394722	GO:0005829; GO:0005886; GO:0005887; GO:0016020; GO:0016021; GO:0016323; GO:0034707	NM_001139443; NM_001300786; NM_001300787; NM_004183; ENST00000378043; ENST00000449131; ENST00000524877; ENST00000524926; ENST00000526988; ENST00000529265; ENST00000533521; ENST00000534553; BC015220; BC041664; OTTHUMT00000394715; OTTHUMT00000394716; OTTHUMT00000394717; OTTHUMT00000394718; OTTHUMT00000394719; OTTHUMT00000394720; OTTHUMT00000394721; OTTHUMT00000394722	GO:0005254				main	Multiple_Complex	Hs04360813_m1
TC1400007500.hg.1	5.85	3.97	3.67	3.67	1	1	5.85	3.97	ARG2	arginase 2	chr14	+	Multiple_Complex	67619798	67651720	NM_001172; ENST00000261783; ENST00000556491; ENST00000557120; ENST00000557319; BC001350; BC008464; BC029050; OTTHUMT00000415190; OTTHUMT00000415208; OTTHUMT00000415209; OTTHUMT00000415210; CCDS9785.1; uc001xjs.4; uc059cqr.1; uc059cqs.1; uc059cqt.1; NONHSAT037458	RefSeq; ENSEMBL; GenBank; Havana transcript; ccdsGene; UCSC Genes; lncRNAWiki; NONCODE	NM_001172; ENST00000261783; ENST00000556491; ENST00000557120; ENST00000557319; BC001350; BC008464; BC029050; OTTHUMT00000415190; OTTHUMT00000415208; OTTHUMT00000415209; OTTHUMT00000415210	GO:0000050; GO:0001657; GO:0006525; GO:0006595; GO:0006809; GO:0006941; GO:0034641; GO:0044281	NM_001172; ENST00000261783; ENST00000556491; ENST00000557120; ENST00000557319; BC001350; BC008464; BC029050; OTTHUMT00000415190; OTTHUMT00000415208; OTTHUMT00000415209; OTTHUMT00000415210	GO:0005739; GO:0005759	NM_001172; ENST00000261783; ENST00000556491; ENST00000557120; ENST00000557319; BC001350; BC008464; BC029050; OTTHUMT00000415190; OTTHUMT00000415208; OTTHUMT00000415209; OTTHUMT00000415210	GO:0004053; GO:0046872; GO:0016787; GO:0016813	NM_001172; BC001350; BC008464; BC029050	HumanCyc	PWY-4984; CITRULBIO-PWY; ARGASEDEG-PWY; ARGININE-DEG1-PWY; ARG-PRO-PWY	main	Multiple_Complex	Hs00265750_m1
TC1800006889.hg.1	13.41	11.53	3.67	3.67	1	1	13.41	11.53	RIOK3	RIO kinase 3	chr18	+	Multiple_Complex	23452823	23486603	NM_003831; ENST00000339486; ENST00000577250; ENST00000577501; ENST00000581220; ENST00000581302; ENST00000581339; ENST00000581585; ENST00000584052; ENST00000584130; ENST00000584960; ENST00000584992; BC028360; BC039729; OTTHUMT00000254756; OTTHUMT00000445290; OTTHUMT00000445291; OTTHUMT00000445292; OTTHUMT00000445293; OTTHUMT00000445294; OTTHUMT00000445295; OTTHUMT00000445296; OTTHUMT00000445297; O…	RefSeq; ENSEMBL; GenBank; Havana transcript; ccdsGene; circbase; Ace View; UCSC Genes; lncRNAWiki; NONCODE	NM_003831; ENST00000339486; ENST00000577250; ENST00000577501; ENST00000581220; ENST00000581302; ENST00000581339; ENST00000581585; ENST00000584052; ENST00000584130; ENST00000584960; ENST00000584992; BC028360; BC039729; OTTHUMT00000254756; OTTHUMT00000445290; OTTHUMT00000445291; OTTHUMT00000445292; OTTHUMT00000445293; OTTHUMT00000445294; OTTHUMT00000445295; OTTHUMT00000445296; OTTHUMT00000445297; O…	GO:0006468; GO:0007059; GO:0016310			NM_003831; ENST00000339486; ENST00000577250; ENST00000577501; ENST00000581220; ENST00000581302; ENST00000581339; ENST00000581585; ENST00000584052; ENST00000584130; ENST00000584960; ENST00000584992; BC028360; BC039729; OTTHUMT00000254756; OTTHUMT00000445290; OTTHUMT00000445291; OTTHUMT00000445292; OTTHUMT00000445293; OTTHUMT00000445294; OTTHUMT00000445295; OTTHUMT00000445296; OTTHUMT00000445297; O…	GO:0004674; GO:0005515; GO:0005524; GO:0046872; GO:0000166; GO:0016301; GO:0016740; GO:0003824; GO:0016772				main	Multiple_Complex	Hs01590882_m1
TC1100012166.hg.1	7.37	9.24	-3.64	3.64	1	1	7.37	9.24	CASP5	caspase 5	chr11	-	Multiple_Complex	104994235	105023168	NM_001136109; NM_001136110; NM_001136112; NM_004347; NR_024239; NR_036562; ENST00000260315; ENST00000393141; ENST00000418434; ENST00000438448; ENST00000444749; ENST00000456094; ENST00000456200; ENST00000526056; ENST00000531367; BC074994; BC113406; OTTHUMT00000109397; OTTHUMT00000344191; OTTHUMT00000344192; OTTHUMT00000344193; OTTHUMT00000344537; OTTHUMT00000387884; OTTHUMT00000387885; uc010ruz.1;…	RefSeq; ENSEMBL; GenBank; Havana transcript; UCSC Genes; ccdsGene			NM_001136109; NM_001136110; NM_001136112; NM_004347; NR_024239; NR_036562; ENST00000260315; ENST00000393141; ENST00000418434; ENST00000438448; ENST00000444749; ENST00000456094; ENST00000456200; ENST00000526056; ENST00000531367; BC074994; BC113406; OTTHUMT00000109397; OTTHUMT00000344191; OTTHUMT00000344192; OTTHUMT00000344193; OTTHUMT00000344537; OTTHUMT00000387884; OTTHUMT00000387885; uc010ruz.1;…	GO:0005737; GO:0072557; GO:0072558; GO:0072559; GO:0097169; GO:0043005; GO:0043025; GO:0043234	NM_001136109; NM_001136110; NM_001136112; NM_004347; NR_024239; NR_036562; ENST00000260315; ENST00000393141; ENST00000418434; ENST00000438448; ENST00000444749; ENST00000456094; ENST00000456200; ENST00000526056; ENST00000531367; BC074994; BC113406; OTTHUMT00000109397; OTTHUMT00000344191; OTTHUMT00000344192; OTTHUMT00000344193; OTTHUMT00000344537; OTTHUMT00000387884; OTTHUMT00000387885; uc010ruz.1;…	GO:0008234; GO:0097200; GO:0004197; GO:0008233; GO:0016787; GO:0097110				main	Multiple_Complex	Hs00237061_m1
TC0100011696.hg.1	8.61	6.75	3.63	3.63	1	1	8.61	6.75	FAM177B	family with sequence similarity 177, member B	chr1	+	Multiple_Complex	222737207	222750805	NM_207468; ENST00000360827; ENST00000391880; ENST00000434700; ENST00000445590; ENST00000456298; ENST00000460763; OTTHUMT00000092149; OTTHUMT00000092150; OTTHUMT00000092151; OTTHUMT00000316736; OTTHUMT00000316737; CCDS1535.2; uc009xeb.4; uc057pqt.1; uc057pqu.1; uc057pqv.1; uc057pqw.1; uc057pqx.1; NONHSAT009704	RefSeq; ENSEMBL; Havana transcript; ccdsGene; UCSC Genes; lncRNAWiki; NONCODE										main	Multiple_Complex	Hs01651957_g1
TC0800008122.hg.1	10.22	8.36	3.63	3.63	1	1	10.22	8.36	E2F5	E2F transcription factor 5, p130-binding	chr8	+	Multiple_Complex	85177225	85217158	NM_001083588; NM_001083589; NM_001951; ENST00000256117; ENST00000416274; ENST00000418930; ENST00000517476; ENST00000518234; ENST00000520225; ENST00000521234; ENST00000521429; OTTHUMT00000380273; OTTHUMT00000380274; OTTHUMT00000380275; OTTHUMT00000380276; OTTHUMT00000380277; OTTHUMT00000381049; OTTHUMT00000381050; OTTHUMT00000381051; BC172475; CCDS47885.1; CCDS47886.1; CCDS55254.1; E2F5.gAug10; hs…	RefSeq; ENSEMBL; Havana transcript; GenBank; ccdsGene; Ace View; circbase; UCSC Genes	NM_001083588; NM_001083589; NM_001951; ENST00000256117; ENST00000416274; ENST00000418930; ENST00000517476; ENST00000518234; ENST00000520225; ENST00000521234; ENST00000521429; OTTHUMT00000380273; OTTHUMT00000380274; OTTHUMT00000380275; OTTHUMT00000380276; OTTHUMT00000380277; OTTHUMT00000381049; OTTHUMT00000381050; OTTHUMT00000381051	GO:0000278; GO:0006351; GO:0006367; GO:0007179; GO:0009887; GO:0010467; GO:0030030; GO:0045944; GO:0051726; GO:0006355	NM_001083588; NM_001083589; NM_001951; ENST00000256117; ENST00000416274; ENST00000418930; ENST00000517476; ENST00000518234; ENST00000520225; ENST00000521234; ENST00000521429; OTTHUMT00000380273; OTTHUMT00000380274; OTTHUMT00000380275; OTTHUMT00000380276; OTTHUMT00000380277; OTTHUMT00000381049; OTTHUMT00000381050; OTTHUMT00000381051	GO:0005634; GO:0005654; GO:0005667; GO:0005730; GO:0005737; GO:0016020; GO:0016021	NM_001083588; NM_001083589; NM_001951; ENST00000256117; ENST00000416274; ENST00000418930; ENST00000517476; ENST00000518234; ENST00000520225; ENST00000521234; ENST00000521429; OTTHUMT00000380273; OTTHUMT00000380274; OTTHUMT00000380275; OTTHUMT00000380276; OTTHUMT00000380277; OTTHUMT00000381049; OTTHUMT00000381050; OTTHUMT00000381051	GO:0003677; GO:0003700; GO:0005515; GO:0008134	NM_001083588; NM_001083589; NM_001951; ENST00000256117; ENST00000416274; ENST00000418930; ENST00000517476; ENST00000518234; ENST00000520225; ENST00000521234; ENST00000521429; OTTHUMT00000380273; OTTHUMT00000380274; OTTHUMT00000380275; OTTHUMT00000380276; OTTHUMT00000380277; OTTHUMT00000381049; OTTHUMT00000381050; OTTHUMT00000381051	GenMAPP	Cell_cycle_KEGG; G1_to_S_cell_cycle_Reactome	main	Multiple_Complex	Hs05047498_s1
TC1100011744.hg.1	7.71	9.56	-3.61	3.61	1	1	7.71	9.56	GAB2	GRB2-associated binding protein 2	chr11	-	Multiple_Complex	78215290	78418348	NM_012296; NM_080491; ENST00000340149; ENST00000361507; ENST00000526030; ENST00000528329; ENST00000528886; ENST00000530915; ENST00000534823; BC131711; BC152459; OTTHUMT00000391084; OTTHUMT00000391085; OTTHUMT00000391086; OTTHUMT00000391087; OTTHUMT00000391088; OTTHUMT00000391089; OTTHUMT00000391090; CCDS8259.1; CCDS8260.1; GAB2.cAug10; GAB2.eAug10; hsa_circ_0023796; hsa_circ_0023797; hsa_circ_002…	RefSeq; ENSEMBL; GenBank; Havana transcript; ccdsGene; Ace View; circbase; UCSC Genes; Guo	NM_012296; NM_080491; ENST00000340149; ENST00000361507; ENST00000526030; ENST00000528329; ENST00000528886; ENST00000530915; ENST00000534823; BC131711; BC152459; OTTHUMT00000391084; OTTHUMT00000391085; OTTHUMT00000391086; OTTHUMT00000391087; OTTHUMT00000391088; OTTHUMT00000391089; OTTHUMT00000391090	GO:0007169; GO:0008284; GO:0030316; GO:0038095; GO:0043306; GO:0045087; GO:0048015; GO:0007229; GO:0016477	NM_012296; NM_080491; ENST00000340149; ENST00000361507; ENST00000526030; ENST00000528329; ENST00000528886; ENST00000530915; ENST00000534823; BC131711; BC152459; OTTHUMT00000391084; OTTHUMT00000391085; OTTHUMT00000391086; OTTHUMT00000391087; OTTHUMT00000391088; OTTHUMT00000391089; OTTHUMT00000391090	GO:0005737; GO:0005829; GO:0005886; GO:0016020	NM_012296; NM_080491; ENST00000340149; ENST00000361507; ENST00000526030; ENST00000528329; ENST00000528886; ENST00000530915; ENST00000534823; BC131711; BC152459; OTTHUMT00000391084; OTTHUMT00000391085; OTTHUMT00000391086; OTTHUMT00000391087; OTTHUMT00000391088; OTTHUMT00000391089; OTTHUMT00000391090	GO:0005068; GO:0005515; GO:0005547; GO:0043325				main	Multiple_Complex	Hs00373045_m1
TC0200008680.hg.1	5.35	3.51	3.59	3.59	1	1	5.35	3.51	SLC9A2	solute carrier family 9, subfamily A (NHE2, cation proton antiporter 2), member 2	chr2	+	Multiple_Complex	102619689	102711350	NM_003048; ENST00000233969; ENST00000467657; ENST00000469286; BC136377; BC136378; OTTHUMT00000253292; OTTHUMT00000329500; OTTHUMT00000329501; CCDS2062.1; hsa_circ_0055915; SLC9A2.dAug10; uc002tca.4; uc061mmr.1; uc061mms.1; NONHSAT072864; NONHSAT072865	RefSeq; ENSEMBL; GenBank; Havana transcript; ccdsGene; circbase; Ace View; UCSC Genes; lncRNAWiki; NONCODE	NM_003048; ENST00000233969; ENST00000467657; ENST00000469286; BC136377; BC136378; OTTHUMT00000253292; OTTHUMT00000329500; OTTHUMT00000329501	GO:0006811; GO:0006885; GO:0008104; GO:0035725; GO:0055085; GO:1902600; GO:0006810; GO:0006812; GO:0006814	NM_003048; ENST00000233969; ENST00000467657; ENST00000469286; BC136377; BC136378; OTTHUMT00000253292; OTTHUMT00000329500; OTTHUMT00000329501	GO:0005886; GO:0016021; GO:0016020	NM_003048; ENST00000233969; ENST00000467657; ENST00000469286; BC136377; BC136378; OTTHUMT00000253292; OTTHUMT00000329500; OTTHUMT00000329501	GO:0015385; GO:0015297; GO:0015299				main	Multiple_Complex	Hs01091123_g1
TC0300009974.hg.1	5.28	7.12	-3.59	3.59	1	1	5.28	7.12	MUC20; SDHAP2; MIR570; LINC00969	mucin 20, cell surface associated; succinate dehydrogenase complex subunit A, flavoprotein pseudogene 2; microRNA 570; long intergenic non-protein coding RNA 969	chr3	+	Multiple_Complex	195658039	195741123			NM_001282506; NM_001291833; NM_152673; NR_003265; ENST00000320736; ENST00000423938; ENST00000436408; ENST00000445522; ENST00000447234; ENST00000480350; ENST00000485430; ENST00000498018; BC029267; BC044243; OTTHUMT00000341835; OTTHUMT00000341836; OTTHUMT00000341838; OTTHUMT00000341841; OTTHUMT00000341842; OTTHUMT00000341844; OTTHUMT00000341845; OTTHUMT00000341947	GO:0000187; GO:0006493; GO:0016266; GO:0043687; GO:0044267; GO:0048012; GO:0051260; GO:0055114	NM_001282506; NM_001291833; NM_152673; NR_122105; ENST00000320736; ENST00000423938; ENST00000436408; ENST00000445522; ENST00000447234; ENST00000480350; ENST00000485430; ENST00000498018; BC029267; BC044243; OTTHUMT00000341835; OTTHUMT00000341836; OTTHUMT00000341838; OTTHUMT00000341841; OTTHUMT00000341842; OTTHUMT00000341844; OTTHUMT00000341845	GO:0005576; GO:0005796; GO:0009925; GO:0016324; GO:0031528; GO:0005886; GO:0016020; GO:0016323; GO:0042995; GO:0016021	NR_003265; ENST00000447234; OTTHUMT00000341947	GO:0016491; GO:0005515				main	Multiple_Complex	Hs00420061_m1
TC0600011499.hg.1	11.28	9.44	3.58	3.58	1	1	11.28	9.44	HLA-DQB1	major histocompatibility complex, class II, DQ beta 1	chr6	-	Multiple_Complex	32659464	32668383	NM_001243961; NM_002123; ENST00000374943; ENST00000399079; ENST00000399082; ENST00000399084; ENST00000434651; ENST00000443574; ENST00000460185; ENST00000484729; ENST00000487676; OTTHUMT00000076215; OTTHUMT00000276126; OTTHUMT00000276127; OTTHUMT00000276128; OTTHUMT00000276129; OTTHUMT00000276131; OTTHUMT00000276132; OTTHUMT00000276133; OTTHUMT00000479527; CCDS43451.1; CCDS59006.1; ENST00000443574…	RefSeq; ENSEMBL; Havana transcript; ccdsGene; lncRNAWiki; Ace View; circbase; UCSC Genes; NONCODE	NM_001243961; NM_002123; ENST00000374943; ENST00000399079; ENST00000399082; ENST00000399084; ENST00000434651; ENST00000443574; ENST00000460185; ENST00000484729; ENST00000487676; OTTHUMT00000076215; OTTHUMT00000276126; OTTHUMT00000276127; OTTHUMT00000276128; OTTHUMT00000276129; OTTHUMT00000276131; OTTHUMT00000276132; OTTHUMT00000276133; OTTHUMT00000479527	GO:0002381; GO:0002455; GO:0006955; GO:0019221; GO:0019886; GO:0031295; GO:0050852; GO:0060333; GO:0002376; GO:0002504; GO:0019882; GO:0002474			NM_001243961; NM_002123; ENST00000374943; ENST00000399079; ENST00000399082; ENST00000399084; ENST00000434651; ENST00000443574; ENST00000460185; ENST00000484729; ENST00000487676; OTTHUMT00000076215; OTTHUMT00000276126; OTTHUMT00000276127; OTTHUMT00000276128; OTTHUMT00000276129; OTTHUMT00000276131; OTTHUMT00000276132; OTTHUMT00000276133; OTTHUMT00000479527	GO:0032395; GO:0042605; GO:0005515				main	Multiple_Complex	Hs03054970_mH
TC0400012015.hg.1	8.81	10.64	-3.55	3.55	1	1	8.81	10.64	GYPE	glycophorin E (MNS blood group)	chr4	-	Multiple_Complex	143870866	143905563	NM_002102; NM_198682; ENST00000358615; ENST00000437468; ENST00000506264; BC017864; OTTHUMT00000364780; OTTHUMT00000364781; OTTHUMT00000364782; CCDS47138.1; GYPE.aAug10; GYPE.bAug10; GYPE.dAug10; hsa_circ_0071048; uc003ijj.4; uc003ijk.5; uc062zwx.1	RefSeq; ENSEMBL; GenBank; Havana transcript; ccdsGene; Ace View; circbase; UCSC Genes			NM_002102; NM_198682; ENST00000358615; ENST00000437468; ENST00000506264; BC017864; OTTHUMT00000364780; OTTHUMT00000364781; OTTHUMT00000364782	GO:0005886; GO:0005887; GO:0016020; GO:0016021	NM_198682; BC017864	GO:0005515				main	Multiple_Complex	Hs00386279_m1
TSUnmapped00000559.hg.1	5.22	7.04	-3.55	3.55	1	1	5.22	7.04	FMN1	formin 1			Coding			ENST00000631811	ENSEMBL	ENST00000631811	GO:0010467; GO:0035136; GO:0035137; GO:0045010; GO:0048705; GO:0048813; GO:0051127; GO:0051894; GO:0072092; GO:0001822; GO:0030838; GO:0060173	ENST00000631811	GO:0005634; GO:0005737; GO:0005884; GO:0005886; GO:0005912; GO:0015630; GO:0016020; GO:0030054	ENST00000631811	GO:0003779; GO:0008017; GO:0017124				main->unmapped	Coding
TC1200012623.hg.1	5.86	7.68	-3.54	3.54	1	1	5.86	7.68	TUBA1C	tubulin, alpha 1c	chr12	+	NonCoding	49188736	49208901	ENST00000549554; OTTHUMT00000404418; uc058nop.1; NONHSAT028085; NONHSAT028086	ENSEMBL; Havana transcript; UCSC Genes; lncRNAWiki; NONCODE	ENST00000549554; OTTHUMT00000404418	GO:0006457; GO:0007017; GO:0030705; GO:0044267; GO:0051084; GO:0051301; GO:0008152	ENST00000549554; OTTHUMT00000404418	GO:0005634; GO:0005737; GO:0005874; GO:0031982; GO:0005856	ENST00000549554; OTTHUMT00000404418	GO:0003924; GO:0005198; GO:0005200; GO:0005515; GO:0005525; GO:0000166				main	NonCoding	Hs05498034_m1
TC1900011852.hg.1	6.5	8.33	-3.54	3.54	1	1	6.5	8.33	RFX2	regulatory factor X, 2 (influences HLA class II expression)	chr19	-	Multiple_Complex	5993164	6113761	NM_000635; NM_134433; ENST00000303657; ENST00000359161; ENST00000586302; ENST00000586806; ENST00000586940; ENST00000587181; ENST00000587321; ENST00000588021; ENST00000589340; ENST00000589742; ENST00000590778; ENST00000590822; ENST00000592172; ENST00000592281; ENST00000592337; ENST00000592473; ENST00000592546; ENST00000593241; BC028579; BC071571; OTTHUMT00000452687; OTTHUMT00000452688; OTTHUMT0000…	RefSeq; ENSEMBL; GenBank; Havana transcript; ccdsGene; circbase; Ace View; UCSC Genes; Guo; lncRNAWiki; NONCODE	NM_000635; NM_134433; ENST00000303657; ENST00000359161; ENST00000586302; ENST00000586806; ENST00000586940; ENST00000587181; ENST00000587321; ENST00000588021; ENST00000589340; ENST00000589742; ENST00000590778; ENST00000590822; ENST00000592172; ENST00000592281; ENST00000592337; ENST00000592473; ENST00000592546; ENST00000593241; BC028579; BC071571; OTTHUMT00000452687; OTTHUMT00000452688; OTTHUMT0000…	GO:0006351; GO:0006357; GO:0006355	NM_000635; NM_134433; ENST00000303657; ENST00000359161; ENST00000586302; ENST00000586806; ENST00000586940; ENST00000587181; ENST00000587321; ENST00000588021; ENST00000589340; ENST00000589742; ENST00000590778; ENST00000590822; ENST00000592172; ENST00000592281; ENST00000592337; ENST00000592473; ENST00000592546; ENST00000593241; BC028579; BC071571; OTTHUMT00000452687; OTTHUMT00000452688; OTTHUMT0000…	GO:0005634	NM_000635; NM_134433; ENST00000303657; ENST00000359161; ENST00000586302; ENST00000586806; ENST00000586940; ENST00000587181; ENST00000587321; ENST00000588021; ENST00000589340; ENST00000589742; ENST00000590778; ENST00000590822; ENST00000592172; ENST00000592281; ENST00000592337; ENST00000592473; ENST00000592546; ENST00000593241; BC028579; BC071571; OTTHUMT00000452687; OTTHUMT00000452688; OTTHUMT0000…	GO:0000978; GO:0003677; GO:0003700				main	Multiple_Complex	Hs00172177_m1
TC0600007568.hg.1	8.82	10.64	-3.52	3.52	1	1	8.82	10.64	HCG27	HLA complex group 27 (non-protein coding)	chr6	+	Multiple_Complex	31197760	31228648	NR_026791; ENST00000383331; ENST00000414008; ENST00000415276; ENST00000424675; OTTHUMT00000076524; OTTHUMT00000076525; OTTHUMT00000257970; OTTHUMT00000467987; hsa_circ_0075930; uc011dni.5; uc063mzq.1; uc063mzr.1; uc063mzt.1; lnc-TCF19-1:1; lnc-TCF19-1:2; lnc-TCF19-1:3; lnc-TCF19-1:4; lnc-TCF19-1:5; lnc-TCF19-1:6; NONHSAT108740; NONHSAT108742; NONHSAT108743; TCONS_00011116; TCONS_00011287; TCONS_0…	RefSeq; ENSEMBL; Havana transcript; circbase; UCSC Genes; lncRNAWiki; NONCODE; lncRNA Db										main	Multiple_Complex	Hs03028297_s1
TC0600014236.hg.1	9.27	7.46	3.5	3.5	1	1	9.27	7.46	TXNDC5	thioredoxin domain containing 5 (endoplasmic reticulum)	chr6	-	Multiple_Complex	7881250	7910814	NM_001145549; NM_030810; ENST00000379757; ENST00000460138; ENST00000469459; ENST00000473453; ENST00000475802; BC001199; OTTHUMT00000039792; OTTHUMT00000039793; OTTHUMT00000348957; OTTHUMT00000348958; OTTHUMT00000348959; CCDS4505.1; CCDS47369.1; hsa_circ_0075591; hsa_circ_0075592; hsa_circ_0075593; hsa_circ_0075594; hsa_circ_0075596; uc003mxv.4; uc010jnz.4; uc063lrs.1; uc063lru.1; uc063lrv.1; NONH…	RefSeq; ENSEMBL; GenBank; Havana transcript; ccdsGene; circbase; UCSC Genes; lncRNAWiki; NONCODE	NM_001145549; NM_030810; ENST00000379757; ENST00000460138; ENST00000469459; ENST00000473453; ENST00000475802; BC001199; OTTHUMT00000039792; OTTHUMT00000039793; OTTHUMT00000348957; OTTHUMT00000348958; OTTHUMT00000348959	GO:0006457; GO:0006892; GO:0008152; GO:0034976; GO:0043066; GO:0043277; GO:0045454; GO:0061024	NM_001145549; NM_030810; ENST00000379757; ENST00000460138; ENST00000469459; ENST00000473453; ENST00000475802; BC001199; OTTHUMT00000039792; OTTHUMT00000039793; OTTHUMT00000348957; OTTHUMT00000348958; OTTHUMT00000348959	GO:0005783; GO:0005788; GO:0043202; GO:0070062; GO:0005623	NM_001145549; NM_030810; ENST00000379757; ENST00000460138; ENST00000469459; ENST00000473453; ENST00000475802; BC001199; OTTHUMT00000039792; OTTHUMT00000039793; OTTHUMT00000348957; OTTHUMT00000348958; OTTHUMT00000348959	GO:0003756; GO:0005515; GO:0016853				main	Multiple_Complex	Hs00229373_m1
TC0300013420.hg.1	10.88	9.08	3.47	3.47	1	1	10.88	9.08	IGF2BP2	insulin-like growth factor 2 mRNA binding protein 2	chr3	-	Multiple_Complex	185643739	185825056	NM_001007225; NM_001291869; NM_001291872; NM_001291873; NM_001291874; NM_001291875; NM_006548; ENST00000346192; ENST00000382199; ENST00000421047; ENST00000457616; ENST00000461957; ENST00000464166; ENST00000466214; ENST00000466476; ENST00000493302; ENST00000494906; ENST00000496495; BC021290; OTTHUMT00000157087; OTTHUMT00000157088; OTTHUMT00000157089; OTTHUMT00000157090; OTTHUMT00000157091; OTTHUMT…	RefSeq; ENSEMBL; GenBank; Havana transcript; ccdsGene; circbase; Ace View; UCSC Genes; lncRNAWiki; NONCODE	NM_001007225; NM_001291869; NM_001291872; NM_001291873; NM_001291874; NM_001291875; NM_006548; ENST00000346192; ENST00000382199; ENST00000421047; ENST00000457616; ENST00000461957; ENST00000464166; ENST00000466214; ENST00000466476; ENST00000493302; ENST00000494906; ENST00000496495; BC021290; OTTHUMT00000157087; OTTHUMT00000157088; OTTHUMT00000157089; OTTHUMT00000157090; OTTHUMT00000157091; OTTHUMT…	GO:0009653; GO:0010467; GO:0017148; GO:0042035; GO:0051028; GO:0006417; GO:0006810	NM_001007225; NM_001291869; NM_001291872; NM_001291873; NM_001291874; NM_001291875; NM_006548; ENST00000346192; ENST00000382199; ENST00000421047; ENST00000457616; ENST00000461957; ENST00000464166; ENST00000466214; ENST00000466476; ENST00000493302; ENST00000494906; ENST00000496495; BC021290; OTTHUMT00000157087; OTTHUMT00000157088; OTTHUMT00000157089; OTTHUMT00000157090; OTTHUMT00000157091; OTTHUMT…	GO:0005634; GO:0005737; GO:0005829; GO:0005856	NM_001007225; NM_001291869; NM_001291872; NM_001291873; NM_001291874; NM_001291875; NM_006548; ENST00000346192; ENST00000382199; ENST00000421047; ENST00000457616; ENST00000461957; ENST00000464166; ENST00000466214; ENST00000466476; ENST00000493302; ENST00000494906; ENST00000496495; BC021290; OTTHUMT00000157087; OTTHUMT00000157088; OTTHUMT00000157089; OTTHUMT00000157090; OTTHUMT00000157091; OTTHUMT…	GO:0000166; GO:0003730; GO:0005515; GO:0044822; GO:0045182; GO:0048027; GO:0003676; GO:0003723; GO:0003729				main	Multiple_Complex	Hs00538954_g1
TC0500010928.hg.1	8.19	6.4	3.46	3.46	1	1	8.19	6.4	CENPK	centromere protein K	chr5	-	Multiple_Complex	65517766	65563171	NM_001267038; NM_022145; ENST00000242872; ENST00000396679; ENST00000502997; ENST00000504508; ENST00000505960; ENST00000506282; ENST00000508311; ENST00000508421; ENST00000509397; ENST00000510354; ENST00000510693; ENST00000510768; ENST00000511841; ENST00000513951; ENST00000514814; ENST00000515497; ENST00000515873; BC005400; BC008504; OTTHUMT00000253971; OTTHUMT00000369513; OTTHUMT00000369514; OTTHU…	RefSeq; ENSEMBL; GenBank; Havana transcript; UCSC Genes; ccdsGene; Ace View; circbase; lncRNAWiki; NONCODE	NM_001267038; NM_022145; ENST00000242872; ENST00000396679; ENST00000502997; ENST00000504508; ENST00000505960; ENST00000506282; ENST00000508311; ENST00000508421; ENST00000509397; ENST00000510354; ENST00000510693; ENST00000510768; ENST00000511841; ENST00000513951; ENST00000514814; ENST00000515497; ENST00000515873; BC005400; BC008504; OTTHUMT00000253971; OTTHUMT00000369513; OTTHUMT00000369514; OTTHU…	GO:0000278; GO:0006334; GO:0007264; GO:0034080; GO:0045944	NM_001267038; NM_022145; ENST00000242872; ENST00000396679; ENST00000502997; ENST00000504508; ENST00000505960; ENST00000506282; ENST00000508311; ENST00000508421; ENST00000509397; ENST00000510354; ENST00000510693; ENST00000510768; ENST00000511841; ENST00000513951; ENST00000514814; ENST00000515497; ENST00000515873; BC005400; BC008504; OTTHUMT00000253971; OTTHUMT00000369513; OTTHUMT00000369514; OTTHU…	GO:0000777; GO:0005654; GO:0005829; GO:0000775; GO:0000776; GO:0005634; GO:0005694	NM_001267038; NM_022145; ENST00000242872; ENST00000396679; ENST00000502997; ENST00000504508; ENST00000505960; ENST00000506282; ENST00000508311; ENST00000508421; ENST00000509397; ENST00000510354; ENST00000510693; ENST00000510768; ENST00000511841; ENST00000513951; ENST00000514814; ENST00000515497; ENST00000515873; BC005400; BC008504; OTTHUMT00000253971; OTTHUMT00000369513; OTTHUMT00000369514; OTTHU…	GO:0005515				main	Multiple_Complex	Hs01044330_m1
TC2200008364.hg.1	5.71	3.92	3.46	3.46	1	1	5.71	3.92	TTC28	Jeck2013 ALT_ACCEPTOR, ALT_DONOR, coding, INTERNAL, intronic best transcript NM_001145418	chr22	-	NonCoding	28514756	28519320	hsa_circ_0006776; chr22_28910744_28915308	circbase; Guo										main	NonCoding	Hs05403289_s1
TC0X00008760.hg.1	7.03	8.8	-3.41	3.41	1	1	7.03	8.8	ZNF185	zinc finger protein 185 (LIM domain)	chrX	+	Multiple_Complex	152914442	152973481	NM_001178106; NM_001178107; NM_001178108; NM_001178109; NM_001178110; NM_001178113; NM_001178115; NM_007150; ENST00000318504; ENST00000318529; ENST00000324823; ENST00000370268; ENST00000370270; ENST00000426821; ENST00000436731; ENST00000447792; ENST00000449285; ENST00000454925; ENST00000535861; ENST00000539731; OTTHUMT00000060933; OTTHUMT00000060934; OTTHUMT00000060935; OTTHUMT00000377480; OTTHUM…	RefSeq; ENSEMBL; Havana transcript; GenBank; ccdsGene; circbase; UCSC Genes; Ace View			NM_001178106; NM_001178107; NM_001178108; NM_001178109; NM_001178110; NM_001178113; NM_001178115; NM_007150; ENST00000318504; ENST00000318529; ENST00000324823; ENST00000370268; ENST00000370270; ENST00000426821; ENST00000436731; ENST00000447792; ENST00000449285; ENST00000454925; ENST00000535861; ENST00000539731; OTTHUMT00000060933; OTTHUMT00000060934; OTTHUMT00000060935; OTTHUMT00000377480; OTTHUM…	GO:0005737; GO:0005886; GO:0005925; GO:0015629; GO:0005856; GO:0030054	NM_001178106; NM_001178107; NM_001178108; NM_001178109; NM_001178110; NM_001178113; NM_001178115; NM_007150; ENST00000318504; ENST00000318529; ENST00000324823; ENST00000370268; ENST00000370270; ENST00000426821; ENST00000436731; ENST00000447792; ENST00000449285; ENST00000454925; ENST00000535861; ENST00000539731; OTTHUMT00000060933; OTTHUMT00000060934; OTTHUMT00000060935; OTTHUMT00000377480; OTTHUM…	GO:0008270; GO:0046872				main	Multiple_Complex	Hs00926776_m1
TC0100014531.hg.1	8.72	10.49	-3.4	3.4	1	1	8.72	10.49	WLS	wntless Wnt ligand secretion mediator	chr1	-	Multiple_Complex	68098459	68233120	NM_001002292; NM_001193334; NM_024911; ENST00000262348; ENST00000354777; ENST00000370971; ENST00000370973; ENST00000370976; ENST00000471243; ENST00000491076; ENST00000491811; ENST00000497187; ENST00000498615; ENST00000527864; ENST00000530486; ENST00000533537; ENST00000534713; BC110826; BC137109; BC137113; OTTHUMT00000025368; OTTHUMT00000025369; OTTHUMT00000025370; OTTHUMT00000025371; OTTHUMT00000…	RefSeq; ENSEMBL; GenBank; Havana transcript; ccdsGene; circbase; UCSC Genes; Guo					NM_001002292; NM_001193334; NM_024911; ENST00000262348; ENST00000354777; ENST00000370971; ENST00000370973; ENST00000370976; ENST00000471243; ENST00000491076; ENST00000491811; ENST00000497187; ENST00000498615; ENST00000527864; ENST00000530486; ENST00000533537; ENST00000534713; BC110826; BC137109; BC137113; OTTHUMT00000025368; OTTHUMT00000025369; OTTHUMT00000025370; OTTHUMT00000025371; OTTHUMT00000…	GO:0004871; GO:0005515; GO:0017147; GO:0031852				main	Multiple_Complex	Hs01553066_m1
TC1500007874.hg.1	9.7	11.47	-3.4	3.4	1	1	9.7	11.47	C15orf39	chromosome 15 open reading frame 39	chr15	+	Coding	75195643	75212169	NM_015492; ENST00000360639; ENST00000394987; ENST00000562637; ENST00000563905; ENST00000564848; ENST00000565074; ENST00000567617; BC011379; BC110367; OTTHUMT00000286410; OTTHUMT00000286411; OTTHUMT00000419787; OTTHUMT00000419788; OTTHUMT00000419789; OTTHUMT00000419790; OTTHUMT00000419792; uc002azp.4; CCDS10276.1; uc002azq.5; uc002azr.5; uc021sqm.2; uc059lpm.1; uc059lpn.1; uc059lpo.1	RefSeq; ENSEMBL; GenBank; Havana transcript; UCSC Genes; ccdsGene			NM_015492; ENST00000360639; ENST00000394987; ENST00000562637; ENST00000563905; ENST00000564848; ENST00000565074; ENST00000567617; BC011379; BC110367; OTTHUMT00000286410; OTTHUMT00000286411; OTTHUMT00000419787; OTTHUMT00000419788; OTTHUMT00000419789; OTTHUMT00000419790; OTTHUMT00000419792; uc002azp.4	GO:0005737						main	Coding	Hs00384344_m1
TC1700010604.hg.1	6.67	8.43	-3.39	3.39	1	1	6.67	8.43	NR1D1	nuclear receptor subfamily 1, group D, member 1	chr17	-	Multiple_Complex	40092784	40100725	NM_021724; ENST00000246672; BC047875; BC056148; OTTHUMT00000257135; CCDS11361.1; uc002htz.4; NONHSAT053516	RefSeq; ENSEMBL; GenBank; Havana transcript; ccdsGene; UCSC Genes; lncRNAWiki; NONCODE	NM_021724; ENST00000246672; BC047875; BC056148; OTTHUMT00000257135	GO:0000122; GO:0005978; GO:0006367; GO:0007623; GO:0010467; GO:0010498; GO:0010871; GO:0019216; GO:0030154; GO:0030522; GO:0032922; GO:0034144; GO:0035947; GO:0042752; GO:0043401; GO:0044321; GO:0045598; GO:0045892; GO:0045893; GO:0060086; GO:0061178; GO:0061469; GO:0070859; GO:0071222; GO:2000188; GO:2000189; GO:0006351; GO:0006355; GO:0048511	NM_021724; ENST00000246672; BC047875; BC056148; OTTHUMT00000257135	GO:0000790; GO:0005634; GO:0005654; GO:0005737; GO:0030425; GO:0043197; GO:0042995	NM_021724; ENST00000246672; BC047875; BC056148; OTTHUMT00000257135	GO:0000977; GO:0000978; GO:0001046; GO:0001078; GO:0001222; GO:0003707; GO:0003714; GO:0004879; GO:0005515; GO:0008270; GO:0020037; GO:0044212; GO:0003677; GO:0003700; GO:0043565; GO:0046872; GO:0004887	NM_021724; ENST00000246672; BC047875; BC056148; OTTHUMT00000257135	GenMAPP	Nuclear_Receptors	main	Multiple_Complex	Hs00253876_m1
TC0900008965.hg.1	4.98	3.22	3.38	3.38	1	1	4.98	3.22	PRDM12	PR domain containing 12	chr9	+	Coding	130664594	130682997	NM_021619; ENST00000253008; OTTHUMT00000054664; CCDS6934.1; PRDM12.aAug10; uc004bzt.2	RefSeq; ENSEMBL; Havana transcript; ccdsGene; Ace View; UCSC Genes	NM_021619; ENST00000253008; OTTHUMT00000054664	GO:0006351; GO:0006355; GO:0022008; GO:0032259; GO:1900111; GO:0006357; GO:0006366	NM_021619; ENST00000253008; OTTHUMT00000054664	GO:0005634	NM_021619; ENST00000253008; OTTHUMT00000054664	GO:0003677; GO:0008168; GO:0046872; GO:0003676; GO:0016740; GO:0005515; GO:0000977; GO:0000981				main	Coding	Hs00222080_m1
TC1600007014.hg.1	11.12	12.87	-3.37	3.37	1	1	11.12	12.87	NDE1; MIR484	nudE neurodevelopment protein 1; microRNA 484	chr16	+	Multiple_Complex	15643267	15726353	NM_017668; NR_030159; ENST00000342673; ENST00000396354; ENST00000396355; ENST00000570727; ENST00000572503; ENST00000572756; ENST00000572967; ENST00000573203; ENST00000573694; ENST00000574109; ENST00000574163; ENST00000576502; ENST00000577101; BC001421; BC033900; OTTHUMT00000252132; OTTHUMT00000252133; OTTHUMT00000436636; OTTHUMT00000436637; OTTHUMT00000436638; OTTHUMT00000436639; OTTHUMT000004366…	RefSeq; ENSEMBL; GenBank; Havana transcript; ccdsGene; circbase; UCSC Genes; Guo; RNACentral; NONCODE; lncRNAWiki					NM_017668; ENST00000342673; ENST00000396354; ENST00000396355; ENST00000570727; ENST00000572503; ENST00000572756; ENST00000572967; ENST00000573203; ENST00000573694; ENST00000574109; ENST00000574163; ENST00000576502; ENST00000577101; BC001421; BC033900; OTTHUMT00000252132; OTTHUMT00000252133; OTTHUMT00000436636; OTTHUMT00000436637; OTTHUMT00000436638; OTTHUMT00000436639; OTTHUMT00000436640; OTTHUMT…	GO:0005515; GO:0008017; GO:0019904; GO:0042802				main	Multiple_Complex	Hs00964072_m1
TC0X00008230.hg.1	11.25	13	-3.36	3.36	1	1	11.25	13	IL13RA1	interleukin 13 receptor, alpha 1	chrX	+	Multiple_Complex	118723584	118794539	NM_001560; ENST00000371642; ENST00000371666; ENST00000481868; BC009960; BC015768; OTTHUMT00000058009; OTTHUMT00000058010; OTTHUMT00000058011; CCDS14573.1; hsa_circ_0091393; hsa_circ_0091394; hsa_circ_0091395; hsa_circ_0091396; hsa_circ_0091397; hsa_circ_0091398; hsa_circ_0091399; hsa_circ_0091400; hsa_circ_0091401; hsa_circ_0091402; hsa_circ_0091403; uc004eqr.2; uc004eqs.4; uc065avn.1; ENST000005…	RefSeq; ENSEMBL; GenBank; Havana transcript; ccdsGene; circbase; UCSC Genes; Guo; lncRNAWiki; NONCODE	NM_001560; ENST00000371642; ENST00000371666; ENST00000481868; BC009960; BC015768; OTTHUMT00000058009; OTTHUMT00000058010; OTTHUMT00000058011	GO:0007166; GO:0019221; GO:0002639; GO:0030890; GO:0035772	NM_001560; ENST00000371642; ENST00000371666; ENST00000481868; BC009960; BC015768; OTTHUMT00000058009; OTTHUMT00000058010; OTTHUMT00000058011	GO:0005886; GO:0005898; GO:0016020; GO:0016021	NM_001560; ENST00000371642; ENST00000371666; ENST00000481868; BC009960; BC015768; OTTHUMT00000058009; OTTHUMT00000058010; OTTHUMT00000058011	GO:0004896; GO:0005515; GO:0016515				main	Multiple_Complex	Hs01124609_m1
TC1200012679.hg.1	7.95	9.7	-3.36	3.36	1	1	7.95	9.7	ACSS3	acyl-CoA synthetase short-chain family member 3	chr12	+	NonCoding	80936414	80940246	ENST00000616449; OTTHUMT00000474703; uc058rja.1	ENSEMBL; Havana transcript; UCSC Genes	ENST00000616449; OTTHUMT00000474703	GO:0008152	ENST00000616449; OTTHUMT00000474703	GO:0005739	ENST00000616449; OTTHUMT00000474703	GO:0003987; GO:0005524; GO:0000166; GO:0003824; GO:0016874				main	NonCoding	Hs03924465_s1
TC1700008134.hg.1	6	7.75	-3.36	3.36	1	1	6	7.75	TBKBP1	TBK1 binding protein 1	chr17	+	Coding	47694081	47712063	NM_014726; ENST00000361722; ENST00000537587; ENST00000578982; ENST00000622396; BC152407; BC167150; OTTHUMT00000441361; OTTHUMT00000441362; OTTHUMT00000441363; CCDS45722.1; uc002ilu.4; uc060gpr.1; uc060gps.1; uc060gpt.1	RefSeq; ENSEMBL; GenBank; Havana transcript; ccdsGene; UCSC Genes	NM_014726; ENST00000361722; ENST00000537587; ENST00000578982; ENST00000622396; BC152407; BC167150; OTTHUMT00000441361; OTTHUMT00000441362; OTTHUMT00000441363	GO:0045087; GO:0002376			NM_014726; ENST00000361722; ENST00000537587; ENST00000578982; ENST00000622396; BC152407; BC167150; OTTHUMT00000441361; OTTHUMT00000441362; OTTHUMT00000441363	GO:0005515				main	Coding	Hs01115083_g1
TC1700012192.hg.1	6.15	7.9	-3.36	3.36	1	1	6.15	7.9	NDEL1	nudE neurodevelopment protein 1-like 1	chr17	+	NonCoding	8413132	8432167	ENST00000579150; OTTHUMT00000442473; uc060bbt.1; NONHSAT145543	ENSEMBL; Havana transcript; UCSC Genes; lncRNAWiki; NONCODE	ENST00000579150; OTTHUMT00000442473	GO:0000132; GO:0000278; GO:0001764; GO:0001833; GO:0006508; GO:0007020; GO:0007059; GO:0007100; GO:0007264; GO:0008090; GO:0010975; GO:0016477; GO:0021799; GO:0021955; GO:0033157; GO:0043547; GO:0045773; GO:0047496; GO:0048680; GO:0051081; GO:0051303; GO:0051642; GO:0060052; GO:0090630; GO:1990138; GO:0000226; GO:0006810; GO:0007275; GO:0007399; GO:0030154; GO:0031175	ENST00000579150; OTTHUMT00000442473	GO:0000776; GO:0000777; GO:0005635; GO:0005813; GO:0005819; GO:0005829; GO:0005871; GO:0005874; GO:0008021; GO:0031252; GO:0043203; GO:0060053; GO:0000775; GO:0005694; GO:0005737; GO:0005815; GO:0005856; GO:0005875; GO:0030424; GO:0044297	ENST00000579150; OTTHUMT00000442473	GO:0005515; GO:0008017; GO:0043014; GO:0048487; GO:0070012; GO:0032403				main	NonCoding	Hs05320141_m1
TC1900009442.hg.1	8.51	10.26	-3.36	3.36	1	1	8.51	10.26	TNFSF14	tumor necrosis factor (ligand) superfamily, member 14	chr19	-	Multiple_Complex	6661253	6670588	NM_003807; NM_172014; ENST00000245912; ENST00000599359; CCDS12171.1; CCDS45939.1; TNFSF14.bAug10; uc002mfk.3; uc060ska.1; NONHSAT060780; OTTHUMT00000457862; OTTHUMT00000457863	RefSeq; ENSEMBL; ccdsGene; Ace View; UCSC Genes; lncRNAWiki; NONCODE; Havana transcript	NM_003807; NM_172014; ENST00000245912; ENST00000599359; OTTHUMT00000457863	GO:0006915; GO:0006955; GO:0007165; GO:0008588; GO:0010820; GO:0031295; GO:0033209; GO:0042098; GO:0042110; GO:0043029; GO:0043154; GO:0045663; GO:0071260; GO:1901741	NM_003807; NM_172014; ENST00000245912; ENST00000599359; OTTHUMT00000457863	GO:0005615; GO:0005737; GO:0005886; GO:0016021; GO:0005576; GO:0016020	NM_003807; NM_172014; ENST00000245912; ENST00000599359; OTTHUMT00000457863	GO:0005102; GO:0005125; GO:0005164; GO:0005515; GO:0043027				main	Multiple_Complex	Hs00542477_m1
TC0100018261.hg.1	5.48	7.22	-3.35	3.35	1	1	5.48	7.22	GSTM4	glutathione S-transferase mu 4	chr1	+	Multiple_Complex	109656076	109665501	NM_000850; NM_147148; NR_024538; ENST00000326729; ENST00000369833; ENST00000369836; ENST00000461767; ENST00000464733; ENST00000478397; ENST00000479578; ENST00000485640; ENST00000493171; ENST00000493395; ENST00000495742; BC015513; BC108729; OTTHUMT00000032187; OTTHUMT00000032188; OTTHUMT00000032189; OTTHUMT00000032190; OTTHUMT00000032191; OTTHUMT00000032192; OTTHUMT00000032193; OTTHUMT00000032194;…	RefSeq; ENSEMBL; GenBank; Havana transcript; ccdsGene; circbase; UCSC Genes	NM_000850; NM_147148; NR_024538; ENST00000326729; ENST00000369833; ENST00000369836; ENST00000461767; ENST00000464733; ENST00000478397; ENST00000479578; ENST00000485640; ENST00000493171; ENST00000493395; ENST00000495742; BC015513; BC108729; OTTHUMT00000032187; OTTHUMT00000032188; OTTHUMT00000032189; OTTHUMT00000032190; OTTHUMT00000032191; OTTHUMT00000032192; OTTHUMT00000032193; OTTHUMT00000032194;…	GO:0006749; GO:0006805; GO:0018916; GO:0042178; GO:0044281; GO:1901687; GO:0008152	NM_000850; NM_147148; NR_024538; ENST00000326729; ENST00000369833; ENST00000369836; ENST00000461767; ENST00000464733; ENST00000478397; ENST00000479578; ENST00000485640; ENST00000493171; ENST00000493395; ENST00000495742; BC015513; BC108729; OTTHUMT00000032187; OTTHUMT00000032188; OTTHUMT00000032189; OTTHUMT00000032190; OTTHUMT00000032191; OTTHUMT00000032192; OTTHUMT00000032193; OTTHUMT00000032194;…	GO:0005737; GO:0005829	NM_000850; NM_147148; NR_024538; ENST00000326729; ENST00000369833; ENST00000369836; ENST00000461767; ENST00000464733; ENST00000478397; ENST00000479578; ENST00000485640; ENST00000493171; ENST00000493395; ENST00000495742; BC015513; BC108729; OTTHUMT00000032187; OTTHUMT00000032188; OTTHUMT00000032189; OTTHUMT00000032190; OTTHUMT00000032191; OTTHUMT00000032192; OTTHUMT00000032193; OTTHUMT00000032194;…	GO:0004364; GO:0005515; GO:0019899; GO:0042803; GO:0043295; GO:0016740	NM_000850; NM_147148; BC015513	HumanCyc	PWY-4061	main	Multiple_Complex	Hs00426432_m1
TC0600011234.hg.1	5.66	3.91	3.35	3.35	1	1	5.66	3.91	HIST1H4L	histone cluster 1, H4l	chr6	-	Coding	27873148	27873511	NM_003546; ENST00000618305; BC069392; OTTHUMT00000043513; CCDS4637.1; HIST1H4L.aAug10-unspliced; uc003njz.4	RefSeq; ENSEMBL; GenBank; Havana transcript; ccdsGene; Ace View; UCSC Genes	NM_003546; ENST00000618305; BC069392; OTTHUMT00000043513	GO:0000183; GO:0000278; GO:0000723; GO:0000724; GO:0006281; GO:0006302; GO:0006303; GO:0006325; GO:0006334; GO:0006335; GO:0006336; GO:0007264; GO:0010467; GO:0031047; GO:0032776; GO:0034080; GO:0035574; GO:0040029; GO:0044267; GO:0045653; GO:0045814; GO:0051290; GO:0006352	NM_003546; ENST00000618305; BC069392; OTTHUMT00000043513	GO:0000228; GO:0000784; GO:0000786; GO:0005576; GO:0005634; GO:0005654; GO:0016020; GO:0043234; GO:0070062; GO:0005694	NM_003546; ENST00000618305; BC069392; OTTHUMT00000043513	GO:0003677; GO:0005515; GO:0019904; GO:0035575; GO:0042393; GO:0044822; GO:0046982				main	Coding	Hs04187442_s1
TC0500013155.hg.1	12.2	13.93	-3.33	3.33	1	1	12.2	13.93	BASP1	brain abundant, membrane attached signal protein 1	chr5	+	Coding	17216823	17276845	NM_001271606; NM_006317; ENST00000322611; ENST00000616743; BC000518; OTTHUMT00000253716; CCDS3888.1; uc003jfx.5; uc031siz.2	RefSeq; ENSEMBL; GenBank; Havana transcript; ccdsGene; UCSC Genes	NM_001271606; NM_006317; ENST00000322611; ENST00000616743; BC000518; OTTHUMT00000253716	GO:0007356; GO:0008406; GO:0021762; GO:0045892; GO:0060231; GO:0060421; GO:0060539; GO:0072075; GO:0072112; GO:2001076	NM_001271606; NM_006317; ENST00000322611; ENST00000616743; BC000518; OTTHUMT00000253716	GO:0005634; GO:0005737; GO:0005856; GO:0005886; GO:0008180; GO:0016607; GO:0030054; GO:0030426; GO:0031982; GO:0070062; GO:0016020; GO:0042995	NM_001271606; NM_006317; ENST00000322611; ENST00000616743; BC000518; OTTHUMT00000253716	GO:0003714; GO:0005515; GO:0019904; GO:0044212				main	Coding	Hs04977480_gH
TC0700008659.hg.1	7.43	9.17	-3.33	3.33	1	1	7.43	9.17	NFE4	nuclear factor, erythroid 4	chr7	+	Multiple_Complex	102973437	102988856	NM_001085386; ENST00000420058.1; OTTHUMT00000347927; uc064gqd.1; ENST00000420058; HG500464.1:1..1072:ncRNA; NONHSAT122530	RefSeq; lncRNAWiki; Havana transcript; UCSC Genes; ENSEMBL; RNACentral; NONCODE	NM_001085386	GO:0006351; GO:0006355	NM_001085386	GO:0005634						main	Multiple_Complex	Hs01399026_m1
TC2000007457.hg.1	8.93	7.19	3.33	3.33	1	1	8.93	7.19	PKIG	protein kinase (cAMP-dependent, catalytic) inhibitor gamma	chr20	+	Multiple_Complex	44531781	44624247	NM_001281444; NM_001281445; NM_007066; NM_181804; NM_181805; ENST00000349959; ENST00000372886; ENST00000372887; ENST00000372889; ENST00000372891; ENST00000372892; ENST00000372894; ENST00000477390; BC104256; BC104257; OTTHUMT00000080411; OTTHUMT00000080412; OTTHUMT00000127801; OTTHUMT00000127802; OTTHUMT00000127803; OTTHUMT00000127804; OTTHUMT00000127805; OTTHUMT00000127806; CCDS13334.1; hsa_circ_…	RefSeq; ENSEMBL; GenBank; Havana transcript; ccdsGene; circbase; Ace View; UCSC Genes	NM_001281444; NM_001281445; NM_007066; NM_181804; NM_181805; ENST00000349959; ENST00000372886; ENST00000372887; ENST00000372889; ENST00000372891; ENST00000372892; ENST00000372894; ENST00000477390; BC104256; BC104257; OTTHUMT00000080411; OTTHUMT00000080412; OTTHUMT00000127801; OTTHUMT00000127802; OTTHUMT00000127803; OTTHUMT00000127804; OTTHUMT00000127805; OTTHUMT00000127806	GO:0000122; GO:0007165; GO:0042308; GO:1904030; GO:2000480; GO:0006469; GO:0016310; GO:0071901	NM_001281444; NM_001281445; NM_007066; NM_181804; NM_181805; ENST00000349959; ENST00000372886; ENST00000372887; ENST00000372889; ENST00000372891; ENST00000372892; ENST00000372894; ENST00000477390; BC104256; BC104257; OTTHUMT00000080411; OTTHUMT00000080412; OTTHUMT00000127801; OTTHUMT00000127802; OTTHUMT00000127803; OTTHUMT00000127804; OTTHUMT00000127805; OTTHUMT00000127806	GO:0005634; GO:0005737	NM_001281444; NM_001281445; NM_007066; NM_181804; NM_181805; ENST00000349959; ENST00000372886; ENST00000372887; ENST00000372889; ENST00000372891; ENST00000372892; ENST00000372894; ENST00000477390; BC104256; BC104257; OTTHUMT00000080411; OTTHUMT00000080412; OTTHUMT00000127801; OTTHUMT00000127802; OTTHUMT00000127803; OTTHUMT00000127804; OTTHUMT00000127805; OTTHUMT00000127806	GO:0004862; GO:0004860; GO:0005515; GO:0016301	NM_001281444; NM_001281445; NM_007066; NM_181804; NM_181805; ENST00000349959; ENST00000372886; ENST00000372887; ENST00000372889; ENST00000372891; ENST00000372892; ENST00000372894; ENST00000477390; BC104256; BC104257; OTTHUMT00000080411; OTTHUMT00000080412; OTTHUMT00000127801; OTTHUMT00000127802; OTTHUMT00000127803; OTTHUMT00000127804; OTTHUMT00000127805; OTTHUMT00000127806	GenMAPP	Calcium_regulation_in_cardiac_cells; Smooth_muscle_contraction	main	Multiple_Complex	Hs00179275_m1
TC0200016648.hg.1	10.11	11.84	-3.32	3.32	1	1	10.11	11.84	CDC42EP3	CDC42 effector protein (Rho GTPase binding) 3	chr2	-	Coding	37641882	37672535	NM_001270436; NM_001270437; NM_001270438; NM_006449; ENST00000295324; ENST00000422687; ENST00000457889; ENST00000611976; BC019270; OTTHUMT00000218581; OTTHUMT00000325583; OTTHUMT00000325586; CCDS1791.1; uc002rqi.3; uc031roa.1; uc061ieu.1; uc061iew.1	RefSeq; ENSEMBL; GenBank; Havana transcript; ccdsGene; UCSC Genes	NM_001270436; NM_001270437; NM_001270438; NM_006449; ENST00000295324; ENST00000422687; ENST00000457889; ENST00000611976; BC019270; OTTHUMT00000218581; OTTHUMT00000325583; OTTHUMT00000325586	GO:0007165; GO:0007266; GO:0008360; GO:0030838; GO:0031274; GO:0043547	NM_001270436; NM_001270437; NM_001270438; NM_006449; ENST00000295324; ENST00000422687; ENST00000457889; ENST00000611976; BC019270; OTTHUMT00000218581; OTTHUMT00000325583; OTTHUMT00000325586	GO:0005737; GO:0005829; GO:0005886; GO:0012505; GO:0015629; GO:0005856; GO:0016020	NM_001270436; NM_001270437; NM_001270438; NM_006449; ENST00000295324; ENST00000422687; ENST00000457889; ENST00000611976; BC019270; OTTHUMT00000218581; OTTHUMT00000325583; OTTHUMT00000325586	GO:0005096; GO:0005519; GO:0017049; GO:0005515				main	Coding	Hs00272381_s1
TC1400006529.hg.1	5.48	7.21	-3.32	3.32	1	1	5.48	7.21	ANG; RNASE4	angiogenin, ribonuclease, RNase A family, 5; ribonuclease, RNase A family, 4	chr14	+	Multiple_Complex	20684100	20701215	NM_001097577; NM_001145; NM_001282192; NM_001282193; NM_002937; NM_194431; ENST00000336811; ENST00000397990; ENST00000397995; ENST00000554073; ENST00000555597; ENST00000555835; BC015520; BC020704; BC054880; BC062698; OTTHUMT00000073726; OTTHUMT00000073729; OTTHUMT00000073731; OTTHUMT00000073732; OTTHUMT00000411228; OTTHUMT00000411229; uc001vxw.4; uc001vxz.3; ANGandRNASE4.fAug10; ANGandRNASE4.gAug…	RefSeq; ENSEMBL; GenBank; Havana transcript; UCSC Genes; Ace View; ccdsGene; lncRNAWiki; NONCODE			NM_001097577; NM_001145; NM_001282192; NM_001282193; NM_002937; NM_194431; ENST00000336811; ENST00000397990; ENST00000397995; ENST00000554073; ENST00000555597; ENST00000555835; BC015520; BC020704; BC054880; BC062698; OTTHUMT00000073726; OTTHUMT00000073729; OTTHUMT00000073731; OTTHUMT00000073732; OTTHUMT00000411228; OTTHUMT00000411229; uc001vxw.4; uc001vxz.3	GO:0005576; GO:0005605; GO:0005615; GO:0005634; GO:0005730; GO:0030426; GO:0032311; GO:0043025; GO:0070062; GO:0005578; GO:0005604	NM_001097577; NM_001145; NM_001282192; NM_001282193; NM_002937; NM_194431; ENST00000336811; ENST00000397990; ENST00000397995; ENST00000554073; ENST00000555597; ENST00000555835; BC015520; BC020704; BC054880; BC062698; OTTHUMT00000073726; OTTHUMT00000073729; OTTHUMT00000073731; OTTHUMT00000073732; OTTHUMT00000411228; OTTHUMT00000411229; uc001vxw.4; uc001vxz.3	GO:0003677; GO:0003779; GO:0004519; GO:0004540; GO:0005102; GO:0005507; GO:0005515; GO:0008201; GO:0019843; GO:0042277; GO:0042803; GO:0003676; GO:0004518; GO:0016787; GO:0004522				main	Multiple_Complex	Hs00268002_s1
TC0400007933.hg.1	9.11	10.84	-3.31	3.31	1	1	9.11	10.84	ANXA3	annexin A3	chr4	+	Multiple_Complex	78551519	78610451	NM_005139; ENST00000264908; ENST00000503570; ENST00000503776; ENST00000505805; ENST00000508214; ENST00000510502; ENST00000512373; ENST00000512542; ENST00000512884; ENST00000514171; BC000871; OTTHUMT00000252516; OTTHUMT00000362870; OTTHUMT00000362871; OTTHUMT00000362872; OTTHUMT00000363490; OTTHUMT00000363491; OTTHUMT00000363492; OTTHUMT00000363493; OTTHUMT00000363494; OTTHUMT00000363495; ANXA3.cA…	RefSeq; ENSEMBL; GenBank; Havana transcript; Ace View; ccdsGene; circbase; UCSC Genes; lncRNAWiki; NONCODE	NM_005139; ENST00000264908; ENST00000503570; ENST00000503776; ENST00000505805; ENST00000508214; ENST00000510502; ENST00000512373; ENST00000512542; ENST00000512884; ENST00000514171; BC000871; OTTHUMT00000252516; OTTHUMT00000362870; OTTHUMT00000362871; OTTHUMT00000362872; OTTHUMT00000363490; OTTHUMT00000363491; OTTHUMT00000363492; OTTHUMT00000363493; OTTHUMT00000363494; OTTHUMT00000363495	GO:0006909; GO:0010595; GO:0021766; GO:0031100; GO:0042742; GO:0043086; GO:0043312; GO:0045766; GO:0051054; GO:0051091; GO:0051384; GO:0070848	NM_005139; ENST00000264908; ENST00000503570; ENST00000503776; ENST00000505805; ENST00000508214; ENST00000510502; ENST00000512373; ENST00000512542; ENST00000512884; ENST00000514171; BC000871; OTTHUMT00000252516; OTTHUMT00000362870; OTTHUMT00000362871; OTTHUMT00000362872; OTTHUMT00000363490; OTTHUMT00000363491; OTTHUMT00000363492; OTTHUMT00000363493; OTTHUMT00000363494; OTTHUMT00000363495	GO:0005737; GO:0005886; GO:0016020; GO:0030424; GO:0030425; GO:0030670; GO:0042581; GO:0043025; GO:0070062	NM_005139; ENST00000264908; ENST00000503570; ENST00000503776; ENST00000505805; ENST00000508214; ENST00000510502; ENST00000512373; ENST00000512542; ENST00000512884; ENST00000514171; BC000871; OTTHUMT00000252516; OTTHUMT00000362870; OTTHUMT00000362871; OTTHUMT00000362872; OTTHUMT00000363490; OTTHUMT00000363491; OTTHUMT00000363492; OTTHUMT00000363493; OTTHUMT00000363494; OTTHUMT00000363495	GO:0005509; GO:0005544; GO:0019834; GO:0048306; GO:0004859	NM_005139; ENST00000264908; ENST00000503570; ENST00000503776; ENST00000505805; ENST00000508214; ENST00000510502; ENST00000512373; ENST00000512542; ENST00000512884; ENST00000514171; BC000871; OTTHUMT00000252516; OTTHUMT00000362870; OTTHUMT00000362871; OTTHUMT00000362872; OTTHUMT00000363490; OTTHUMT00000363491; OTTHUMT00000363492; OTTHUMT00000363493; OTTHUMT00000363494; OTTHUMT00000363495	GenMAPP	Prostaglandin_synthesis_regulation	main	Multiple_Complex	Hs00971417_m1
TC1700008769.hg.1	9.69	11.42	-3.3	3.3	1	1	9.69	11.42	KCNJ2	potassium channel, inwardly rectifying subfamily J, member 2	chr17	+	Coding	70168673	70180048	NM_000891; ENST00000243457; ENST00000535240; OTTHUMT00000450888; OTTHUMT00000450889; CCDS11688.1; uc002jir.4; uc010dfg.4	RefSeq; ENSEMBL; Havana transcript; ccdsGene; UCSC Genes	NM_000891; ENST00000243457; ENST00000535240; OTTHUMT00000450888; OTTHUMT00000450889	GO:0006813; GO:0007268; GO:0010107; GO:0014861; GO:0015693; GO:0030007; GO:0051289; GO:0055119; GO:0060075; GO:0060306; GO:0071260; GO:0071805; GO:0086002; GO:0086011; GO:0086012; GO:0086013; GO:0086091; GO:0090076; GO:1901381; GO:0006810; GO:0006811; GO:0034765; GO:0086001; GO:0086004	NM_000891; ENST00000243457; ENST00000535240; OTTHUMT00000450888; OTTHUMT00000450889	GO:0005790; GO:0005791; GO:0005794; GO:0005886; GO:0005887; GO:0008076; GO:0014704; GO:0030315; GO:0031224; GO:0043025; GO:0043197; GO:0016020; GO:0016021; GO:0030425	NM_000891; ENST00000243457; ENST00000535240; OTTHUMT00000450888; OTTHUMT00000450889	GO:0005242; GO:0005546; GO:0042802; GO:0086008; GO:0005244; GO:0005515				main	Coding	Hs01876357_s1
TC0100013076.hg.1	9.66	11.38	-3.29	3.29	1	1	9.66	11.38	PADI2	peptidyl arginine deiminase, type II	chr1	-	Multiple_Complex	17066761	17119453	NM_007365; ENST00000375481; ENST00000375486; ENST00000466151; ENST00000479534; BC009701; OTTHUMT00000006624; OTTHUMT00000006625; OTTHUMT00000006626; OTTHUMT00000006627; CCDS177.1; PADI2.cAug10; uc001baf.4; uc001bag.2; uc057ctx.1; uc057cty.1	RefSeq; ENSEMBL; GenBank; Havana transcript; ccdsGene; Ace View; UCSC Genes	NM_007365; ENST00000375481; ENST00000375486; ENST00000466151; ENST00000479534; BC009701; OTTHUMT00000006624; OTTHUMT00000006625; OTTHUMT00000006626; OTTHUMT00000006627	GO:0010848; GO:0018101; GO:0021762; GO:0030520; GO:0036413; GO:0048096; GO:0070100; GO:1901624	NM_007365; ENST00000375481; ENST00000375486; ENST00000466151; ENST00000479534; BC009701; OTTHUMT00000006624; OTTHUMT00000006625; OTTHUMT00000006626; OTTHUMT00000006627	GO:0005737; GO:0035327; GO:0070062	NM_007365; ENST00000375481; ENST00000375486; ENST00000466151; ENST00000479534; BC009701; OTTHUMT00000006624; OTTHUMT00000006625; OTTHUMT00000006626; OTTHUMT00000006627	GO:0004668; GO:0005509; GO:0030331; GO:0016787	NM_007365; BC009701	HumanCyc	PWY-4921	main	Multiple_Complex	Hs01042500_m1
TC0600011232.hg.1	9.93	8.21	3.29	3.29	1	1	9.93	8.21	HIST1H1B	histone cluster 1, H1b	chr6	-	Multiple_Complex	27866792	27867581	NM_005322; ENST00000331442; BC069101; BC101581; BC101583; OTTHUMT00000043371; CCDS4635.1; hsa_circ_0001596; uc003njx.4	RefSeq; ENSEMBL; GenBank; Havana transcript; ccdsGene; circbase; UCSC Genes	NM_005322; ENST00000331442; BC069101; BC101581; BC101583; OTTHUMT00000043371	GO:0000122; GO:0006325; GO:0006334; GO:0030307; GO:0050821; GO:0051574; GO:0071169	NM_005322; ENST00000331442; BC069101; BC101581; BC101583; OTTHUMT00000043371	GO:0000786; GO:0000790; GO:0005720; GO:0070062; GO:0005634; GO:0005694	NM_005322; ENST00000331442; BC069101; BC101581; BC101583; OTTHUMT00000043371	GO:0031490; GO:0042826; GO:0044822; GO:0003677				main	Multiple_Complex	Hs00271207_s1
TC0700007480.hg.1	5.09	6.81	-3.29	3.29	1	1	5.09	6.81	ABCA13	Memczak2013 ALT_ACCEPTOR, ALT_DONOR, coding, INTERNAL, intronic best transcript NM_152701	chr7	+	NonCoding	48502125	48502552	hsa_circ_0001707; chr7_48541721_48542148	circbase; Guo										main	NonCoding	TaqMan Probe Unavailable
TC2100007208.hg.1	13.52	11.8	3.29	3.29	1	1	13.52	11.8	MX1	MX dynamin-like GTPase 1	chr21	+	Multiple_Complex	41420304	41459214	NM_001144925; NM_001178046; NM_001282920; NM_002462; ENST00000288383; ENST00000398598; ENST00000398600; ENST00000413778; ENST00000417963; ENST00000419044; ENST00000424365; ENST00000427464; ENST00000441677; ENST00000455164; ENST00000467510; ENST00000468506; ENST00000478268; ENST00000484465; ENST00000486275; ENST00000490220; ENST00000491110; ENST00000619682; BC032602; OTTHUMT00000195161; OTTHUMT000…	RefSeq; ENSEMBL; GenBank; Havana transcript; ccdsGene; circbase; Ace View; UCSC Genes; lncRNAWiki; NONCODE					NM_001144925; NM_001178046; NM_001282920; NM_002462; ENST00000288383; ENST00000398598; ENST00000398600; ENST00000413778; ENST00000417963; ENST00000419044; ENST00000424365; ENST00000427464; ENST00000441677; ENST00000455164; ENST00000467510; ENST00000468506; ENST00000478268; ENST00000484465; ENST00000486275; ENST00000490220; ENST00000491110; ENST00000619682; BC032602; OTTHUMT00000195161; OTTHUMT000…	GO:0003924; GO:0005515; GO:0005525; GO:0000166				main	Multiple_Complex	Hs00895604_m1
TSUnmapped00000714.hg.1	8.02	9.74	-3.29	3.29	1	1	8.02	9.74	MANSC1	MANSC domain containing 1			Coding			ENST00000631077	ENSEMBL			ENST00000631077	GO:0016021; GO:0016020						main->unmapped	Coding
TC0900010063.hg.1	8.85	10.56	-3.27	3.27	1	1	8.85	10.56	CNTNAP3	contactin associated protein-like 3	chr9	-	Multiple_Complex	39072767	39288315	NM_033655; ENST00000297668; ENST00000358144; ENST00000377653; ENST00000377656; ENST00000377659; ENST00000443583; ENST00000448573; ENST00000469061; ENST00000477002; ENST00000483502; ENST00000493965; ENST00000495573; BC132737; OTTHUMT00000052511; OTTHUMT00000052512; OTTHUMT00000052513; OTTHUMT00000052514; OTTHUMT00000052515; OTTHUMT00000052516; OTTHUMT00000052517; OTTHUMT00000052518; OTTHUMT0000005…	RefSeq; ENSEMBL; GenBank; Havana transcript; UCSC Genes; ccdsGene; Ace View; circbase; lncRNAWiki; NONCODE	NM_033655; ENST00000297668; ENST00000358144; ENST00000377653; ENST00000377656; ENST00000377659; ENST00000443583; ENST00000448573; ENST00000469061; ENST00000477002; ENST00000483502; ENST00000493965; ENST00000495573; BC132737; OTTHUMT00000052511; OTTHUMT00000052512; OTTHUMT00000052513; OTTHUMT00000052514; OTTHUMT00000052515; OTTHUMT00000052516; OTTHUMT00000052517; OTTHUMT00000052518; OTTHUMT0000005…	GO:0007155; GO:0008037	NM_033655; ENST00000297668; ENST00000358144; ENST00000377653; ENST00000377656; ENST00000377659; ENST00000443583; ENST00000448573; ENST00000469061; ENST00000477002; ENST00000483502; ENST00000493965; ENST00000495573; BC132737; OTTHUMT00000052511; OTTHUMT00000052512; OTTHUMT00000052513; OTTHUMT00000052514; OTTHUMT00000052515; OTTHUMT00000052516; OTTHUMT00000052517; OTTHUMT00000052518; OTTHUMT0000005…	GO:0005576; GO:0005886; GO:0016021; GO:0016020	ENST00000297668; ENST00000358144; ENST00000377656; ENST00000377659	GO:0005515				main	Multiple_Complex	Hs00276736_m1
TC0900009333.hg.1	13.46	15.15	-3.24	3.24	1	1	13.46	15.15	FAM157B	family with sequence similarity 157, member B	chr9	+	Multiple_Complex	138216187	138258850	NM_001145249; ENST00000446912.2; ENST00000540522.1; FAM157B.aAug10; OTTHUMT00000055378; uc011mfe.2; uc011mff.3; ENST00000446912; ENST00000540522; HG502561.1:1..1795:ncRNA; lnc-CACNA1B-1:2; lnc-CACNA1B-1:3; NONHSAT135770; NONHSAT135771; NONHSAT135772; TCONS_00016238	RefSeq; lncRNAWiki; Ace View; Havana transcript; UCSC Genes; ENSEMBL; RNACentral; NONCODE; lncRNA Db										main	Multiple_Complex	Hs05027087_m1
TC0900009944.hg.1	11.27	9.57	3.24	3.24	1	1	11.27	9.57	CD72	CD72 molecule	chr9	-	Multiple_Complex	35609533	35646857	NM_001782; ENST00000259633; ENST00000378430; ENST00000378431; ENST00000396757; ENST00000463720; ENST00000465754; ENST00000470387; ENST00000477364; ENST00000482121; ENST00000490239; ENST00000612238; BC030227; OTTHUMT00000052336; OTTHUMT00000052337; OTTHUMT00000052338; OTTHUMT00000052339; OTTHUMT00000052340; OTTHUMT00000052341; OTTHUMT00000052342; OTTHUMT00000052343; OTTHUMT00000052344; uc003zxb.2;…	RefSeq; ENSEMBL; GenBank; Havana transcript; UCSC Genes; ccdsGene; Ace View; circbase; lncRNAWiki; NONCODE	NM_001782; ENST00000259633; ENST00000378430; ENST00000378431; ENST00000396757; ENST00000463720; ENST00000465754; ENST00000470387; ENST00000477364; ENST00000482121; ENST00000490239; ENST00000612238; BC030227; OTTHUMT00000052336; OTTHUMT00000052337; OTTHUMT00000052338; OTTHUMT00000052339; OTTHUMT00000052340; OTTHUMT00000052341; OTTHUMT00000052342; OTTHUMT00000052343; OTTHUMT00000052344; uc003zxb.2	GO:0007155; GO:0007165; GO:0007411	NM_001782; ENST00000259633; ENST00000378430; ENST00000378431; ENST00000396757; ENST00000463720; ENST00000465754; ENST00000470387; ENST00000477364; ENST00000482121; ENST00000490239; ENST00000612238; BC030227; OTTHUMT00000052336; OTTHUMT00000052337; OTTHUMT00000052338; OTTHUMT00000052339; OTTHUMT00000052340; OTTHUMT00000052341; OTTHUMT00000052342; OTTHUMT00000052343; OTTHUMT00000052344; uc003zxb.2	GO:0005886; GO:0005887; GO:0016020; GO:0016021	NM_001782; ENST00000259633; ENST00000378430; ENST00000378431; ENST00000396757; ENST00000463720; ENST00000465754; ENST00000470387; ENST00000477364; ENST00000482121; ENST00000490239; ENST00000612238; BC030227; OTTHUMT00000052336; OTTHUMT00000052337; OTTHUMT00000052338; OTTHUMT00000052339; OTTHUMT00000052340; OTTHUMT00000052341; OTTHUMT00000052342; OTTHUMT00000052343; OTTHUMT00000052344; uc003zxb.2	GO:0004888; GO:0005102; GO:0005515; GO:0030246				main	Multiple_Complex	Hs00960062_m1
TC1200010577.hg.1	7.74	9.42	-3.22	3.22	1	1	7.74	9.42	ZNF641	zinc finger protein 641	chr12	-	Multiple_Complex	48337180	48351414	NM_001172681; NM_001172682; NM_152320; ENST00000301042; ENST00000448928; ENST00000544117; ENST00000546874; ENST00000547026; ENST00000548932; ENST00000549125; ENST00000549512; ENST00000550181; ENST00000550342; BC018090; OTTHUMT00000406518; OTTHUMT00000406520; OTTHUMT00000406521; OTTHUMT00000406522; OTTHUMT00000406523; OTTHUMT00000406524; OTTHUMT00000406525; OTTHUMT00000406526; OTTHUMT00000406527; …	RefSeq; ENSEMBL; GenBank; Havana transcript; ccdsGene; UCSC Genes; Ace View	NM_001172681; NM_001172682; NM_152320; ENST00000301042; ENST00000448928; ENST00000544117; ENST00000546874; ENST00000547026; ENST00000548932; ENST00000549125; ENST00000549512; ENST00000550181; ENST00000550342; BC018090; OTTHUMT00000406518; OTTHUMT00000406520; OTTHUMT00000406521; OTTHUMT00000406522; OTTHUMT00000406523; OTTHUMT00000406524; OTTHUMT00000406525; OTTHUMT00000406526; OTTHUMT00000406527	GO:0006351; GO:0006357; GO:0006355; GO:0006366	NM_001172681; NM_001172682; NM_152320; ENST00000301042; ENST00000448928; ENST00000544117; ENST00000546874; ENST00000547026; ENST00000548932; ENST00000549125; ENST00000549512; ENST00000550181; ENST00000550342; BC018090; OTTHUMT00000406518; OTTHUMT00000406520; OTTHUMT00000406521; OTTHUMT00000406522; OTTHUMT00000406523; OTTHUMT00000406524; OTTHUMT00000406525; OTTHUMT00000406526; OTTHUMT00000406527	GO:0005654; GO:0005737; GO:0005622; GO:0005634	NM_001172681; NM_001172682; NM_152320; ENST00000301042; ENST00000448928; ENST00000544117; ENST00000546874; ENST00000547026; ENST00000548932; ENST00000549125; ENST00000549512; ENST00000550181; ENST00000550342; BC018090; OTTHUMT00000406518; OTTHUMT00000406520; OTTHUMT00000406521; OTTHUMT00000406522; OTTHUMT00000406523; OTTHUMT00000406524; OTTHUMT00000406525; OTTHUMT00000406526; OTTHUMT00000406527	GO:0000981; GO:0003677; GO:0046872; GO:0003676; GO:0003700				main	Multiple_Complex	Hs01075388_g1
TC2200009324.hg.1	6.32	4.64	3.22	3.22	1	1	6.32	4.64	DRICH1	aspartate-rich 1	chr22	-	Multiple_Complex	23608452	23632321	NM_016449; ENST00000317749; ENST00000614553; BC056888; OTTHUMT00000319708; C22orf43.aAug10; CCDS42985.1; uc062cfp.1; NONHSAT083919; uc002zxf.3	RefSeq; ENSEMBL; GenBank; Havana transcript; Ace View; ccdsGene; UCSC Genes; lncRNAWiki; NONCODE					NM_016449; ENST00000317749; ENST00000614553; BC056888; OTTHUMT00000319708	GO:0005515				main	Multiple_Complex	Hs01580498_m1
TC0100018262.hg.1	6.19	7.87	-3.21	3.21	1	1	6.19	7.87	GSTM2	glutathione S-transferase mu 2 (muscle)	chr1	+	Multiple_Complex	109668022	109683997	NM_000848; NM_001142368; ENST00000241337; ENST00000369827; ENST00000369829; ENST00000414179; ENST00000442650; ENST00000464206; ENST00000467579; ENST00000472225; ENST00000476040; ENST00000481656; ENST00000496578; ENST00000568786; BC105038; BC105066; BC110380; OTTHUMT00000032167; OTTHUMT00000032168; OTTHUMT00000032169; OTTHUMT00000032171; OTTHUMT00000032174; OTTHUMT00000032175; OTTHUMT00000032176; …	RefSeq; ENSEMBL; GenBank; Havana transcript; UCSC Genes; ccdsGene; Ace View; circbase; lncRNAWiki; NONCODE			NM_000848; NM_001142368; ENST00000241337; ENST00000369827; ENST00000369829; ENST00000414179; ENST00000442650; ENST00000464206; ENST00000467579; ENST00000472225; ENST00000476040; ENST00000481656; ENST00000496578; ENST00000568786; BC105038; BC105066; BC110380; OTTHUMT00000032167; OTTHUMT00000032168; OTTHUMT00000032169; OTTHUMT00000032171; OTTHUMT00000032174; OTTHUMT00000032175; OTTHUMT00000032176; …	GO:0005737; GO:0005829; GO:0016529; GO:0070062	NM_000848; NM_001142368; ENST00000241337; ENST00000369827; ENST00000369829; ENST00000414179; ENST00000442650; ENST00000464206; ENST00000467579; ENST00000472225; ENST00000476040; ENST00000481656; ENST00000496578; ENST00000568786; BC105038; BC105066; BC110380; OTTHUMT00000032167; OTTHUMT00000032168; OTTHUMT00000032169; OTTHUMT00000032171; OTTHUMT00000032174; OTTHUMT00000032175; OTTHUMT00000032176; …	GO:0004364; GO:0005102; GO:0019899; GO:0042803; GO:0043295; GO:0016740; GO:0005515	NM_000848	HumanCyc	PWY-4061	main	Multiple_Complex	Hs00265266_g1
TC0300012006.hg.1	5.22	3.54	3.21	3.21	1	1	5.22	3.54	CD200R1L	CD200 receptor 1 like	chr3	-	Coding	112815709	112846856	NM_001008784; NM_001199215; ENST00000398214; ENST00000448932; ENST00000486723; ENST00000488794; ENST00000617549; OTTHUMT00000354365; OTTHUMT00000354366; OTTHUMT00000354367; uc003dzi.1; BC172292; CCDS43131.1; CCDS56267.1; CD200R1L.aAug10; uc010hqf.2; uc062mld.1; uc062mle.1; uc062mlf.1	RefSeq; ENSEMBL; Havana transcript; UCSC Genes; GenBank; ccdsGene; Ace View			NM_001008784; NM_001199215; ENST00000398214; ENST00000448932; ENST00000486723; ENST00000488794; ENST00000617549; OTTHUMT00000354365; OTTHUMT00000354366; OTTHUMT00000354367; uc003dzi.1	GO:0016021; GO:0016020	ENST00000398214; ENST00000448932; ENST00000488794; ENST00000617549	GO:0005515				main	Coding	Hs02339408_m1
TC0200016484.hg.1	9.19	7.51	3.2	3.2	1	1	9.19	7.51	RGPD2; RGPD1	RANBP2-like and GRIP domain containing 2; RANBP2-like and GRIP domain containing 1	chr2	+	Multiple_Complex	86907953	87013981	NM_001078170; OTTHUMT00000330684; OTTHUMT00000330685; NM_001024457_2; BC172352; CCDS46358.2; hsa_circ_0003034; hsa_circ_0055543; RGPD1.bAug10; uc010fgv.4; uc021vkh.2; uc061lnu.1; uc061lnv.1; ENST00000398193; ENST00000409776; ENST00000428128; ENST00000559485	RefSeq; Havana transcript; GenBank; ccdsGene; circbase; Ace View; UCSC Genes; ENSEMBL	NM_001078170; OTTHUMT00000330684; OTTHUMT00000330685; ENST00000398193; ENST00000409776; ENST00000428128; ENST00000559485	GO:0000042; GO:0046907	NM_001078170; OTTHUMT00000330684; OTTHUMT00000330685; ENST00000398193; ENST00000409776; ENST00000428128; ENST00000559485	GO:0005622	ENST00000398193; ENST00000409776; ENST00000559485	GO:0005515				main	Multiple_Complex	Hs00196669_m1
TC1700010221.hg.1	8.91	10.58	-3.19	3.19	1	1	8.91	10.58	DHRS13	dehydrogenase/reductase (SDR family) member 13	chr17	-	Multiple_Complex	28897781	28903071	NM_144683; ENST00000378895; ENST00000394901; ENST00000426464; ENST00000581759; ENST00000581974; BC015582; OTTHUMT00000255952; OTTHUMT00000255953; OTTHUMT00000446733; OTTHUMT00000446734; OTTHUMT00000446735; uc002hde.4; CCDS11246.2; hsa_circ_0042727; uc002hdd.5; uc010wba.3; uc060dgg.1; uc060dgh.1; NONHSAT052668; NONHSAT052669	RefSeq; ENSEMBL; GenBank; Havana transcript; UCSC Genes; ccdsGene; circbase; lncRNAWiki; NONCODE	NM_144683; ENST00000378895; ENST00000394901; ENST00000426464; ENST00000581759; ENST00000581974; BC015582; OTTHUMT00000255952; OTTHUMT00000255953; OTTHUMT00000446733; OTTHUMT00000446734; OTTHUMT00000446735; uc002hde.4	GO:0055114; GO:0008152	NM_144683; ENST00000378895; ENST00000394901; ENST00000426464; ENST00000581759; ENST00000581974; BC015582; OTTHUMT00000255952; OTTHUMT00000255953; OTTHUMT00000446733; OTTHUMT00000446734; OTTHUMT00000446735; uc002hde.4	GO:0005576; GO:0016020	NM_144683; ENST00000378895; ENST00000394901; ENST00000426464; ENST00000581759; ENST00000581974; BC015582; OTTHUMT00000255952; OTTHUMT00000255953; OTTHUMT00000446733; OTTHUMT00000446734; OTTHUMT00000446735; uc002hde.4	GO:0016491				main	Multiple_Complex	Hs05015313_s1
TC0200013916.hg.1	12.1	13.77	-3.18	3.18	1	1	12.1	13.77	IL1B	interleukin 1 beta	chr2	-	Multiple_Complex	112829751	112836903	NM_000576; ENST00000263341; ENST00000416750; ENST00000418817; ENST00000432018; ENST00000477398; ENST00000487639; ENST00000491056; ENST00000496280; BC008678; OTTHUMT00000254125; OTTHUMT00000330717; OTTHUMT00000330718; OTTHUMT00000330719; OTTHUMT00000330720; OTTHUMT00000330721; OTTHUMT00000330722; OTTHUMT00000330723; CCDS2102.1; hsa_circ_0056158; IL1B.eAug10; uc002tii.2; uc061nbf.1; uc061nbg.1; uc0…	RefSeq; ENSEMBL; GenBank; Havana transcript; ccdsGene; circbase; Ace View; UCSC Genes; lncRNAWiki; NONCODE			NM_000576; ENST00000263341; ENST00000416750; ENST00000418817; ENST00000432018; ENST00000477398; ENST00000487639; ENST00000491056; ENST00000496280; BC008678; OTTHUMT00000254125; OTTHUMT00000330717; OTTHUMT00000330718; OTTHUMT00000330719; OTTHUMT00000330720; OTTHUMT00000330721; OTTHUMT00000330722; OTTHUMT00000330723	GO:0005576; GO:0005615; GO:0005764; GO:0005776; GO:0005829; GO:0030141; GO:0070062; GO:0005737; GO:0031410; GO:0031982	NM_000576; ENST00000263341; ENST00000416750; ENST00000418817; ENST00000432018; ENST00000477398; ENST00000487639; ENST00000491056; ENST00000496280; BC008678; OTTHUMT00000254125; OTTHUMT00000330717; OTTHUMT00000330718; OTTHUMT00000330719; OTTHUMT00000330720; OTTHUMT00000330721; OTTHUMT00000330722; OTTHUMT00000330723	GO:0005125; GO:0005149; GO:0019904; GO:0005102	NM_000576; ENST00000263341; ENST00000416750; ENST00000418817; ENST00000432018; ENST00000477398; ENST00000487639; ENST00000491056; ENST00000496280; BC008678; OTTHUMT00000254125; OTTHUMT00000330717; OTTHUMT00000330718; OTTHUMT00000330719; OTTHUMT00000330720; OTTHUMT00000330721; OTTHUMT00000330722; OTTHUMT00000330723	GenMAPP	Smooth_muscle_contraction	main	Multiple_Complex	Hs01555409_g1
TC0400007330.hg.1	5.26	6.92	-3.18	3.18	1	1	5.26	6.92	NSUN7	NOP2/Sun domain family, member 7	chr4	+	Multiple_Complex	40749897	40809985	NM_024677; ENST00000316607; ENST00000381782; ENST00000423784; ENST00000463952; ENST00000469033; ENST00000473399; ENST00000478857; BC036568; OTTHUMT00000250454; OTTHUMT00000250455; OTTHUMT00000330419; OTTHUMT00000330420; OTTHUMT00000330421; OTTHUMT00000330422; OTTHUMT00000330423; uc003gvj.4; CCDS3461.2; NSUN7.cAug10; NSUN7.dAug10; NSUN7.fAug10; uc003gvi.5; uc062wdt.1; uc062wdu.1; uc062wdv.1; uc062…	RefSeq; ENSEMBL; GenBank; Havana transcript; UCSC Genes; ccdsGene; Ace View; lncRNAWiki; NONCODE	NM_024677; ENST00000316607; ENST00000381782; ENST00000423784; ENST00000463952; ENST00000469033; ENST00000473399; ENST00000478857; BC036568; OTTHUMT00000250454; OTTHUMT00000250455; OTTHUMT00000330419; OTTHUMT00000330420; OTTHUMT00000330421; OTTHUMT00000330422; OTTHUMT00000330423; uc003gvj.4	GO:0032259			NM_024677; ENST00000316607; ENST00000381782; ENST00000423784; ENST00000463952; ENST00000469033; ENST00000473399; ENST00000478857; BC036568; OTTHUMT00000250454; OTTHUMT00000250455; OTTHUMT00000330419; OTTHUMT00000330420; OTTHUMT00000330421; OTTHUMT00000330422; OTTHUMT00000330423; uc003gvj.4	GO:0003723; GO:0008168; GO:0016740	NM_024677; ENST00000316607; ENST00000381782; ENST00000423784; ENST00000463952; ENST00000469033; ENST00000473399; ENST00000478857; BC036568; OTTHUMT00000250454; OTTHUMT00000250455; OTTHUMT00000330419; OTTHUMT00000330420; OTTHUMT00000330421; OTTHUMT00000330422; OTTHUMT00000330423; uc003gvj.4	GenMAPP	Cell_cycle_KEGG; G1_to_S_cell_cycle_Reactome	main	Multiple_Complex	Hs04973605_m1
TC0100008815.hg.1	10.4	8.74	3.17	3.17	1	1	10.4	8.74	IFI44L	interferon-induced protein 44-like	chr1	+	Multiple_Complex	78619922	78646145	NM_006820; ENST00000370751; ENST00000450498; ENST00000452835; ENST00000459784; ENST00000462041; ENST00000474002; ENST00000476521; ENST00000476876; ENST00000486882; ENST00000494910; BC015932; OTTHUMT00000026834; OTTHUMT00000026835; OTTHUMT00000026836; OTTHUMT00000026837; OTTHUMT00000026838; OTTHUMT00000026839; OTTHUMT00000026840; OTTHUMT00000026841; OTTHUMT00000096291; OTTHUMT00000324180; uc010oro…	RefSeq; ENSEMBL; GenBank; Havana transcript; UCSC Genes; ccdsGene; circbase; Ace View; lncRNAWiki; NONCODE	NM_006820; ENST00000370751; ENST00000450498; ENST00000452835; ENST00000459784; ENST00000462041; ENST00000474002; ENST00000476521; ENST00000476876; ENST00000486882; ENST00000494910; BC015932; OTTHUMT00000026834; OTTHUMT00000026835; OTTHUMT00000026836; OTTHUMT00000026837; OTTHUMT00000026838; OTTHUMT00000026839; OTTHUMT00000026840; OTTHUMT00000026841; OTTHUMT00000096291; OTTHUMT00000324180; uc010oro…	GO:0006955; GO:0051607	NM_006820; ENST00000370751; ENST00000450498; ENST00000452835; ENST00000459784; ENST00000462041; ENST00000474002; ENST00000476521; ENST00000476876; ENST00000486882; ENST00000494910; BC015932; OTTHUMT00000026834; OTTHUMT00000026835; OTTHUMT00000026836; OTTHUMT00000026837; OTTHUMT00000026838; OTTHUMT00000026839; OTTHUMT00000026840; OTTHUMT00000026841; OTTHUMT00000096291; OTTHUMT00000324180; uc010oro…	GO:0005654; GO:0005737	NM_006820; ENST00000370751; ENST00000450498; ENST00000452835; ENST00000459784; ENST00000462041; ENST00000474002; ENST00000476521; ENST00000476876; ENST00000486882; ENST00000494910; BC015932; OTTHUMT00000026834; OTTHUMT00000026835; OTTHUMT00000026836; OTTHUMT00000026837; OTTHUMT00000026838; OTTHUMT00000026839; OTTHUMT00000026840; OTTHUMT00000026841; OTTHUMT00000096291; OTTHUMT00000324180; uc010oro…	GO:0005525				main	Multiple_Complex	Hs00199115_m1
TC0600013231.hg.1	11.16	12.83	-3.17	3.17	1	1	11.16	12.83	SGK1	serum/glucocorticoid regulated kinase 1	chr6	-	Multiple_Complex	134169246	134318112	NM_001143676; NM_001143677; NM_001143678; NM_001291995; NM_005627; ENST00000237305; ENST00000367855; ENST00000367857; ENST00000367858; ENST00000413996; ENST00000460769; ENST00000461976; ENST00000472859; ENST00000473704; ENST00000474427; ENST00000475719; ENST00000475882; ENST00000477460; ENST00000484353; ENST00000485771; ENST00000489458; ENST00000490149; ENST00000524387; ENST00000524764; ENST00000…	RefSeq; ENSEMBL; GenBank; Havana transcript; UCSC Genes; ccdsGene; circbase; Ace View; lncRNAWiki; NONCODE										main	Multiple_Complex	Hs00985037_g1
TC1900007859.hg.1	11.08	12.74	-3.17	3.17	1	1	11.08	12.74	FFAR2	free fatty acid receptor 2	chr19	+	Multiple_Complex	35443907	35451767	NM_005306; ENST00000246549; ENST00000599180; ENST00000601590; BC096198; BC096199; BC096201; OTTHUMT00000466120; OTTHUMT00000466481; CCDS12461.1; uc010eea.4; uc060xcw.1; uc060xcx.1; NONHSAT065844	RefSeq; ENSEMBL; GenBank; Havana transcript; ccdsGene; UCSC Genes; lncRNAWiki; NONCODE	NM_005306; ENST00000246549; ENST00000599180; ENST00000601590; BC096198; BC096199; BC096201; OTTHUMT00000466120; OTTHUMT00000466481	GO:0002232; GO:0002385; GO:0002673; GO:0002720; GO:0002752; GO:0002879; GO:0007186; GO:0019915; GO:0032722; GO:0042593; GO:0045444; GO:0071398; GO:0090276; GO:2000484; GO:0002376; GO:0006954; GO:0007165	NM_005306; ENST00000246549; ENST00000599180; ENST00000601590; BC096198; BC096199; BC096201; OTTHUMT00000466120; OTTHUMT00000466481	GO:0005886; GO:0005887; GO:0042995; GO:0016020; GO:0016021	NM_005306; ENST00000246549; ENST00000599180; ENST00000601590; BC096198; BC096199; BC096201; OTTHUMT00000466120; OTTHUMT00000466481	GO:0004930; GO:0005515; GO:0008289; GO:0004871				main	Multiple_Complex	Hs00271142_s1
TC1400009579.hg.1	3.94	5.6	-3.16	3.16	1	1	3.94	5.6	ADAM20	ADAM metallopeptidase domain 20	chr14	-	Coding	70522358	70535015	NM_003814; ENST00000256389; BC025378; OTTHUMT00000395004; CCDS32111.1; uc001xme.4	RefSeq; ENSEMBL; GenBank; Havana transcript; ccdsGene; UCSC Genes	NM_003814; ENST00000256389; BC025378; OTTHUMT00000395004	GO:0006508; GO:0007338; GO:0007339; GO:0032504	NM_003814; ENST00000256389; BC025378; OTTHUMT00000395004	GO:0005886; GO:0016021; GO:0016020	NM_003814; ENST00000256389; BC025378; OTTHUMT00000395004	GO:0004222; GO:0008237; GO:0008270; GO:0008233; GO:0016787; GO:0046872				main	Coding	Hs00243625_s1
TC1600010756.hg.1	6.07	7.73	-3.16	3.16	1	1	6.07	7.73	ST3GAL2	ST3 beta-galactoside alpha-2,3-sialyltransferase 2	chr16	-	Multiple_Complex	70375978	70439237	NM_006927; ENST00000342907; ENST00000393640; ENST00000561708; ENST00000566097; ENST00000567586; ENST00000567822; BC036777; OTTHUMT00000268968; OTTHUMT00000435164; OTTHUMT00000435177; OTTHUMT00000435178; OTTHUMT00000435179; uc002eyx.2; CCDS10890.1; hsa_circ_0040218; hsa_circ_0040219; hsa_circ_0040220; hsa_circ_0040221; hsa_circ_0040222; ST3GAL2.dAug10; uc002eyw.3; uc059wpp.1; uc059wpq.1; uc059wpr.…	RefSeq; ENSEMBL; GenBank; Havana transcript; UCSC Genes; ccdsGene; circbase; Ace View; lncRNAWiki; NONCODE	NM_006927; ENST00000342907; ENST00000393640; ENST00000561708; ENST00000566097; ENST00000567586; ENST00000567822; BC036777; OTTHUMT00000268968; OTTHUMT00000435164; OTTHUMT00000435177; OTTHUMT00000435178; OTTHUMT00000435179; uc002eyx.2	GO:0001574; GO:0005975; GO:0006040; GO:0006464; GO:0006488; GO:0006493; GO:0009311; GO:0016266; GO:0018146; GO:0018279; GO:0030203; GO:0042339; GO:0043687; GO:0044267; GO:0044281; GO:0097503; GO:0006486	NM_006927; ENST00000342907; ENST00000393640; ENST00000561708; ENST00000566097; ENST00000567586; ENST00000567822; BC036777; OTTHUMT00000268968; OTTHUMT00000435164; OTTHUMT00000435177; OTTHUMT00000435178; OTTHUMT00000435179; uc002eyx.2	GO:0000139; GO:0005576; GO:0030173; GO:0032580; GO:0005794; GO:0016020; GO:0016021	NM_006927; ENST00000342907; ENST00000393640; ENST00000561708; ENST00000566097; ENST00000567586; ENST00000567822; BC036777; OTTHUMT00000268968; OTTHUMT00000435164; OTTHUMT00000435177; OTTHUMT00000435178; OTTHUMT00000435179; uc002eyx.2	GO:0003836; GO:0008373; GO:0016740; GO:0016757				main	Multiple_Complex	Hs00911836_g1
TC1800008487.hg.1	5.01	3.36	3.14	3.14	1	1	5.01	3.36	CELF4	CUGBP, Elav-like family member 4	chr18	-	Multiple_Complex	37243045	37566037	NM_001025087; NM_001025088; NM_001025089; NM_020180; ENST00000334919; ENST00000361795; ENST00000420428; ENST00000586009; ENST00000587074; ENST00000587449; ENST00000587657; ENST00000587819; ENST00000587911; ENST00000587924; ENST00000588591; ENST00000588597; ENST00000589229; ENST00000589386; ENST00000590011; ENST00000590112; ENST00000591282; ENST00000591287; ENST00000591421; ENST00000593271; ENST00…	RefSeq; ENSEMBL; GenBank; Havana transcript; ccdsGene; Ace View; UCSC Genes; lncRNAWiki; NONCODE			NM_001025087; NM_001025088; NM_001025089; NM_020180; ENST00000334919; ENST00000361795; ENST00000420428; ENST00000586009; ENST00000587074; ENST00000587449; ENST00000587657; ENST00000587819; ENST00000587911; ENST00000587924; ENST00000588591; ENST00000588597; ENST00000589229; ENST00000589386; ENST00000590011; ENST00000590112; ENST00000591282; ENST00000591287; ENST00000591421; ENST00000593271; ENST00…	GO:0005634; GO:0005737	NM_001025087; NM_001025088; NM_001025089; NM_020180; ENST00000334919; ENST00000361795; ENST00000420428; ENST00000586009; ENST00000587074; ENST00000587449; ENST00000587657; ENST00000587819; ENST00000587911; ENST00000587924; ENST00000588591; ENST00000588597; ENST00000589229; ENST00000589386; ENST00000590011; ENST00000590112; ENST00000591282; ENST00000591287; ENST00000591421; ENST00000593271; ENST00…	GO:0000166; GO:0000900; GO:0003729; GO:0042835; GO:0003676; GO:0003723				main	Multiple_Complex	Hs00252384_m1
TC0100006805.hg.1	5.8	7.44	-3.13	3.13	1	1	5.8	7.44	RBP7	retinol binding protein 7, cellular	chr1	+	Multiple_Complex	9997197	10016020	NM_052960; ENST00000294435; ENST00000315901; BC063013; OTTHUMT00000005027; OTTHUMT00000005028; CCDS109.1; hsa_circ_0009682; uc001aqq.4; uc057cbu.1	RefSeq; ENSEMBL; GenBank; Havana transcript; ccdsGene; circbase; UCSC Genes	NM_052960; ENST00000294435; ENST00000315901; BC063013; OTTHUMT00000005027; OTTHUMT00000005028	GO:0006810	NM_052960; ENST00000294435; ENST00000315901; BC063013; OTTHUMT00000005027; OTTHUMT00000005028	GO:0005737	NM_052960; ENST00000294435; ENST00000315901; BC063013; OTTHUMT00000005027; OTTHUMT00000005028	GO:0005215; GO:0005515; GO:0016918; GO:0019841; GO:0005501; GO:0008289				main	Multiple_Complex	Hs00925164_g1
TC0100007255.hg.1	6.59	4.94	3.12	3.12	1	1	6.59	4.94	HSPG2	Jeck2013 ANTISENSE, CDS, coding, INTERNAL, intronic, OVCODE, OVEXON best transcript NM_005529	chr1	+	NonCoding	21847534	21847691	hsa_circ_0008411	circbase										main	NonCoding	TaqMan Probe Unavailable
TC0100012328.hg.1	11.65	10.01	3.12	3.12	1	1	11.65	10.01	TRIM58	tripartite motif containing 58	chr1	+	Multiple_Complex	247857199	247880136	NM_015431; ENST00000366481; OTTHUMT00000096860; CCDS1636.1; hsa_circ_0017353; uc001ido.4	RefSeq; ENSEMBL; Havana transcript; ccdsGene; circbase; UCSC Genes	NM_015431; ENST00000366481; OTTHUMT00000096860	GO:0016567; GO:0007165; GO:0007186; GO:0007608; GO:0050896; GO:0050911	NM_015431; ENST00000366481; OTTHUMT00000096860	GO:0005622; GO:0005886; GO:0016020; GO:0016021	NM_015431; ENST00000366481; OTTHUMT00000096860	GO:0008270; GO:0016874; GO:0004871; GO:0004930; GO:0004984; GO:0046872; GO:0005515				main	Multiple_Complex	Hs00296057_m1
TC0300013970.hg.1	7.86	9.5	-3.12	3.12	1	1	7.86	9.5	PFKFB4; MIR6823	6-phosphofructo-2-kinase/fructose-2,6-biphosphatase 4; microRNA 6823	chr3	-	Multiple_Complex	48517684	48561172	NM_004567; NR_106881; ENST00000232375; ENST00000383734; ENST00000412035; ENST00000416568; ENST00000417753; ENST00000422701; ENST00000445633; ENST00000452531; ENST00000468162; ENST00000471890; ENST00000478516; ENST00000490115; ENST00000490404; ENST00000622118; BC010269; OTTHUMT00000257503; OTTHUMT00000344754; OTTHUMT00000344755; OTTHUMT00000344756; OTTHUMT00000344757; OTTHUMT00000344758; OTTHUMT00…	RefSeq; ENSEMBL; GenBank; Havana transcript; ccdsGene; Ace View; circbase; UCSC Genes; Guo; lncRNAWiki; NONCODE; RNACentral	NM_004567; ENST00000232375; ENST00000383734; ENST00000412035; ENST00000416568; ENST00000417753; ENST00000422701; ENST00000445633; ENST00000452531; ENST00000468162; ENST00000471890; ENST00000478516; ENST00000490115; ENST00000490404; BC010269; OTTHUMT00000257503; OTTHUMT00000344754; OTTHUMT00000344755; OTTHUMT00000344756; OTTHUMT00000344757; OTTHUMT00000344758; OTTHUMT00000344787; OTTHUMT0000034478…	GO:0005975; GO:0006000; GO:0006003; GO:0006006; GO:0016311; GO:0044281; GO:0046835; GO:0061621; GO:0008152; GO:0016310; GO:0006470	NM_004567; ENST00000232375; ENST00000383734; ENST00000412035; ENST00000416568; ENST00000417753; ENST00000422701; ENST00000445633; ENST00000452531; ENST00000468162; ENST00000471890; ENST00000478516; ENST00000490115; ENST00000490404; BC010269; OTTHUMT00000257503; OTTHUMT00000344754; OTTHUMT00000344755; OTTHUMT00000344756; OTTHUMT00000344757; OTTHUMT00000344758; OTTHUMT00000344787; OTTHUMT0000034478…	GO:0005829	NM_004567; ENST00000232375; ENST00000383734; ENST00000412035; ENST00000416568; ENST00000417753; ENST00000422701; ENST00000445633; ENST00000452531; ENST00000468162; ENST00000471890; ENST00000478516; ENST00000490115; ENST00000490404; BC010269; OTTHUMT00000257503; OTTHUMT00000344754; OTTHUMT00000344755; OTTHUMT00000344756; OTTHUMT00000344757; OTTHUMT00000344758; OTTHUMT00000344787; OTTHUMT0000034478…	GO:0003873; GO:0004331; GO:0005524; GO:0000166; GO:0003824; GO:0016301; GO:0016740; GO:0016787				main	Multiple_Complex	Hs00894601_g1
TC1500009737.hg.1	5.87	7.51	-3.12	3.12	1	1	5.87	7.51	PPIB	Jeck2013 ALT_ACCEPTOR, ALT_DONOR, coding, INTERNAL, intronic, OVERLAPTX, OVEXON best transcript NM_000942	chr15	-	NonCoding	64156601	64156655	hsa_circ_0003150	circbase										main	NonCoding	TaqMan Probe Unavailable
TC0800010990.hg.1	16.42	14.79	3.11	3.11	1	1	16.42	14.79	CA1	carbonic anhydrase I	chr8	-	Multiple_Complex	85327608	85379014	NM_001128829; NM_001128830; NM_001128831; NM_001164830; NM_001291967; NM_001291968; NM_001738; ENST00000431316; ENST00000517429; ENST00000517590; ENST00000517618; ENST00000518233; ENST00000518341; ENST00000519129; ENST00000519991; ENST00000520093; ENST00000520663; ENST00000520692; ENST00000520990; ENST00000521679; ENST00000521846; ENST00000522389; ENST00000522579; ENST00000522662; ENST00000522814…	RefSeq; ENSEMBL; GenBank; Havana transcript; Ace View; ccdsGene; UCSC Genes; lncRNAWiki; NONCODE	NM_001128829; NM_001128830; NM_001128831; NM_001164830; NM_001291967; NM_001291968; NM_001738; ENST00000431316; ENST00000517429; ENST00000517590; ENST00000517618; ENST00000518233; ENST00000518341; ENST00000519129; ENST00000519991; ENST00000520093; ENST00000520663; ENST00000520692; ENST00000520990; ENST00000521679; ENST00000521846; ENST00000522389; ENST00000522579; ENST00000522662; ENST00000522814…	GO:0006730; GO:0015701; GO:0044281	NM_001128829; NM_001128830; NM_001128831; NM_001164830; NM_001291967; NM_001291968; NM_001738; ENST00000431316; ENST00000517429; ENST00000517590; ENST00000517618; ENST00000518233; ENST00000518341; ENST00000519129; ENST00000519991; ENST00000520093; ENST00000520663; ENST00000520692; ENST00000520990; ENST00000521679; ENST00000521846; ENST00000522389; ENST00000522579; ENST00000522662; ENST00000522814…	GO:0005829; GO:0070062; GO:0005737						main	Multiple_Complex	Hs01100173_m1
TC0900010056.hg.1	5.02	6.65	-3.11	3.11	1	1	5.02	6.65	ANKRD18A; FAM95C	ankyrin repeat domain 18A; family with sequence similarity 95, member C	chr9	-	Multiple_Complex	38540567	38620660	NM_147195; NR_047651; ENST00000399703; ENST00000475234; ENST00000562942; ENST00000602295; ENST00000607974; ENST00000625242; BC152434; OTTHUMT00000052506; OTTHUMT00000052507; OTTHUMT00000467992; CCDS55311.1; ENST00000562942.1; ENST00000566538.1; ENST00000567428.2; hsa_circ_0087094; LOC100289137.fAug10; LOC100289137.lAug10; OTTHUMT00000420104; OTTHUMT00000472991; OTTHUMT00000472992; OTTHUMT00000481…	RefSeq; ENSEMBL; GenBank; Havana transcript; ccdsGene; lncRNAWiki; circbase; Ace View; UCSC Genes; NONCODE; RNACentral					ENST00000399703	GO:0005515				main	Multiple_Complex	Hs01589053_m1
TC0900012160.hg.1	8.16	9.8	-3.11	3.11	1	1	8.16	9.8	GNG10	guanine nucleotide binding protein (G protein), gamma 10	chr9	+	Coding	111661335	111670246	NM_001017998; NM_001198664; ENST00000374293; BC072671; BC107574; OTTHUMT00000053644; CCDS35107.1; DNAJC25-GNG10.fAug10; uc004bfp.4	RefSeq; ENSEMBL; GenBank; Havana transcript; ccdsGene; Ace View; UCSC Genes	NM_001017998; NM_001198664; ENST00000374293; BC072671; BC107574; OTTHUMT00000053644	GO:0006112; GO:0007165; GO:0007186; GO:0007268; GO:0044281; GO:0071377	NM_001017998; NM_001198664; ENST00000374293; BC072671; BC107574; OTTHUMT00000053644	GO:0005834; GO:0005886; GO:0070062; GO:0016020; GO:0016021	NM_001017998; NM_001198664; ENST00000374293; BC072671; BC107574; OTTHUMT00000053644	GO:0003924; GO:0004871; GO:0005515	NM_001017998; NM_001198664; ENST00000374293; BC072671; BC107574; OTTHUMT00000053644	GenMAPP	G_Protein_Signaling	main	Coding	Hs02597217_g1
TC0800009529.hg.1	9.6	11.24	-3.1	3.1	1	1	9.6	11.24	PPP1R3B	protein phosphatase 1, regulatory subunit 3B	chr8	-	Coding	9136254	9151642	NM_001201329; NM_024607; ENST00000310455; ENST00000519699; BC043388; OTTHUMT00000251472; OTTHUMT00000374693; CCDS5973.1; uc003wsn.5; uc003wso.5	RefSeq; ENSEMBL; GenBank; Havana transcript; ccdsGene; UCSC Genes	NM_001201329; NM_024607; ENST00000310455; ENST00000519699; BC043388; OTTHUMT00000251472; OTTHUMT00000374693	GO:0005977; GO:0005979; GO:0005981; GO:0006470; GO:0050790; GO:0005975; GO:0016311	NM_001201329; NM_024607; ENST00000310455; ENST00000519699; BC043388; OTTHUMT00000251472; OTTHUMT00000374693	GO:0000164; GO:0042587; GO:0043231	NM_001201329; NM_024607; ENST00000310455; ENST00000519699; BC043388; OTTHUMT00000251472; OTTHUMT00000374693	GO:0004721; GO:0019888; GO:0019899; GO:0005515				main	Coding	Hs00226322_m1
TC0100009355.hg.1	4.63	3	3.08	3.08	1	1	4.63	3	GPR61	G protein-coupled receptor 61	chr1	+	Multiple_Complex	109539872	109548406	NM_031936; ENST00000404129; ENST00000469383; ENST00000526744; ENST00000527748; ENST00000533959; ENST00000616874; ENST00000618721; BC067464; uc001dxy.2; CCDS801.1; GPR61.cAug10; uc057izl.1; uc057izm.1; uc057izn.1; uc057izp.1; uc057izq.1; uc057izr.1; NONHSAT005043; NONHSAT005044; OTTHUMT00000032149; OTTHUMT00000384441; OTTHUMT00000385575; OTTHUMT00000385576; OTTHUMT00000385577	RefSeq; ENSEMBL; GenBank; UCSC Genes; ccdsGene; Ace View; lncRNAWiki; NONCODE; Havana transcript	NM_031936; ENST00000404129; ENST00000469383; ENST00000526744; ENST00000527748; ENST00000533959; ENST00000616874; ENST00000618721; BC067464; uc001dxy.2; OTTHUMT00000032149; OTTHUMT00000384441; OTTHUMT00000385575	GO:0007186; GO:0007165; GO:0008150	NM_031936; ENST00000404129; ENST00000469383; ENST00000526744; ENST00000527748; ENST00000533959; ENST00000616874; ENST00000618721; BC067464; uc001dxy.2; OTTHUMT00000032149; OTTHUMT00000384441; OTTHUMT00000385575	GO:0005886; GO:0016021; GO:0043235; GO:0005575; GO:0016020	NM_031936; ENST00000404129; ENST00000469383; ENST00000526744; ENST00000527748; ENST00000533959; ENST00000616874; ENST00000618721; BC067464; uc001dxy.2; OTTHUMT00000032149; OTTHUMT00000384441; OTTHUMT00000385575	GO:0004930; GO:0004871	NM_031936; ENST00000404129; ENST00000469383; ENST00000526744; ENST00000527748; ENST00000533959; ENST00000616874; ENST00000618721; BC067464; uc001dxy.2	GenMAPP	GPCRDB_Other	main	Multiple_Complex	Hs00259108_s1
TC0100013724.hg.1	14.98	16.61	-3.08	3.08	1	1	14.98	16.61	CSF3R	colony stimulating factor 3 receptor	chr1	-	Multiple_Complex	36466043	36483314	NM_000760; NM_156039; NM_172313; ENST00000331941; ENST00000361632; ENST00000373103; ENST00000373104; ENST00000373106; ENST00000464365; ENST00000464465; ENST00000466138; ENST00000469380; ENST00000480825; ENST00000484762; ENST00000487540; ENST00000489551; ENST00000526980; ENST00000533491; BC053585; OTTHUMT00000021997; OTTHUMT00000021999; OTTHUMT00000022000; OTTHUMT00000022001; OTTHUMT00000022050; O…	RefSeq; ENSEMBL; GenBank; Havana transcript; ccdsGene; Ace View; UCSC Genes; lncRNAWiki; NONCODE	NM_000760; NM_156039; NM_172313; ENST00000331941; ENST00000361632; ENST00000373103; ENST00000373104; ENST00000373106; ENST00000464365; ENST00000464465; ENST00000466138; ENST00000469380; ENST00000480825; ENST00000484762; ENST00000487540; ENST00000489551; ENST00000526980; ENST00000533491; BC053585; OTTHUMT00000021997; OTTHUMT00000021999; OTTHUMT00000022000; OTTHUMT00000022001; OTTHUMT00000022050; O…	GO:0006952; GO:0007155; GO:0007165; GO:0019221; GO:0030593; GO:0045637; GO:0097186	NM_000760; NM_156039; NM_172313; ENST00000331941; ENST00000361632; ENST00000373103; ENST00000373104; ENST00000373106; ENST00000464365; ENST00000464465; ENST00000466138; ENST00000469380; ENST00000480825; ENST00000484762; ENST00000487540; ENST00000489551; ENST00000526980; ENST00000533491; BC053585; OTTHUMT00000021997; OTTHUMT00000021999; OTTHUMT00000022000; OTTHUMT00000022001; OTTHUMT00000022050; O…	GO:0005576; GO:0005887; GO:0005886; GO:0016020; GO:0016021	NM_000760; NM_156039; NM_172313; ENST00000331941; ENST00000361632; ENST00000373103; ENST00000373104; ENST00000373106; ENST00000464365; ENST00000464465; ENST00000466138; ENST00000469380; ENST00000480825; ENST00000484762; ENST00000487540; ENST00000489551; ENST00000526980; ENST00000533491; BC053585; OTTHUMT00000021997; OTTHUMT00000021999; OTTHUMT00000022000; OTTHUMT00000022001; OTTHUMT00000022050; O…	GO:0004872; GO:0004896; GO:0005515				main	Multiple_Complex	Hs01116084_g1
TC0600007285.hg.1	12.51	10.89	3.08	3.08	1	1	12.51	10.89	HIST1H2AE	histone cluster 1, H2ae	chr6	+	Coding	26216920	26217483	NM_021052; ENST00000303910; BC093836; BC093862; OTTHUMT00000040103; CCDS4595.1; HIST1H2AE.aAug10-unspliced; uc003nha.2	RefSeq; ENSEMBL; GenBank; Havana transcript; ccdsGene; Ace View; UCSC Genes	NM_021052; ENST00000303910; BC093836; BC093862; OTTHUMT00000040103	GO:0006325; GO:0006342; GO:0008285	NM_021052; ENST00000303910; BC093836; BC093862; OTTHUMT00000040103	GO:0000786; GO:0000790; GO:0005634; GO:0070062; GO:0005694	NM_021052; ENST00000303910; BC093836; BC093862; OTTHUMT00000040103	GO:0003677; GO:0046982				main	Coding	Hs00368307_s1
TC1100011144.hg.1	5.88	4.26	3.07	3.07	1	1	5.88	4.26	MACROD1	MACRO domain containing 1	chr11	-	Multiple_Complex	63998558	64166113	NM_014067; ENST00000255681; ENST00000538042; ENST00000538595; ENST00000541041; ENST00000542105; ENST00000542359; ENST00000543422; ENST00000545464; BC000270; BC003188; BC007297; BC008316; OTTHUMT00000396570; OTTHUMT00000396571; OTTHUMT00000396572; OTTHUMT00000396573; OTTHUMT00000396925; OTTHUMT00000396926; OTTHUMT00000396927; OTTHUMT00000396928; CCDS8056.1; hsa_circ_0022626; hsa_circ_0022627; hsa_…	RefSeq; ENSEMBL; GenBank; Havana transcript; ccdsGene; circbase; Ace View; UCSC Genes; lncRNAWiki; NONCODE	NM_014067; ENST00000255681; ENST00000538042; ENST00000538595; ENST00000541041; ENST00000542105; ENST00000542359; ENST00000543422; ENST00000545464; BC000270; BC003188; BC007297; BC008316; OTTHUMT00000396570; OTTHUMT00000396571; OTTHUMT00000396572; OTTHUMT00000396573; OTTHUMT00000396925; OTTHUMT00000396926; OTTHUMT00000396927; OTTHUMT00000396928	GO:0006974; GO:0042278; GO:0051725	NM_014067; ENST00000255681; ENST00000538042; ENST00000538595; ENST00000541041; ENST00000542105; ENST00000542359; ENST00000543422; ENST00000545464; BC000270; BC003188; BC007297; BC008316; OTTHUMT00000396570; OTTHUMT00000396571; OTTHUMT00000396572; OTTHUMT00000396573; OTTHUMT00000396925; OTTHUMT00000396926; OTTHUMT00000396927; OTTHUMT00000396928	GO:0005634; GO:0005739	NM_014067; ENST00000255681; ENST00000538042; ENST00000538595; ENST00000541041; ENST00000542105; ENST00000542359; ENST00000543422; ENST00000545464; BC000270; BC003188; BC007297; BC008316; OTTHUMT00000396570; OTTHUMT00000396571; OTTHUMT00000396572; OTTHUMT00000396573; OTTHUMT00000396925; OTTHUMT00000396926; OTTHUMT00000396927; OTTHUMT00000396928	GO:0005515; GO:0016798; GO:0019213; GO:0016787				main	Multiple_Complex	Hs00997742_m1
TC1100013069.hg.1	8.7	7.08	3.07	3.07	1	1	8.7	7.08	FOLR3	folate receptor 3 (gamma)	chr11	+	Multiple_Complex	72135710	72139892	NM_000804; ENST00000442948; ENST00000545379; ENST00000546166; ENST00000611028; ENST00000612844; OTTHUMT00000396739; OTTHUMT00000396740; OTTHUMT00000396741; OTTHUMT00000396742; BC148785; CCDS73344.1; FOLR3.dAug10; FOLR3.fAug10; uc031xur.2; uc031xus.2; uc058ezt.1; uc058ezu.1; uc058ezv.1; NONHSAT022757	RefSeq; ENSEMBL; Havana transcript; GenBank; ccdsGene; Ace View; UCSC Genes; lncRNAWiki; NONCODE	NM_000804; ENST00000442948; ENST00000545379; ENST00000546166; ENST00000611028; ENST00000612844; OTTHUMT00000396739; OTTHUMT00000396740; OTTHUMT00000396741; OTTHUMT00000396742	GO:0015884	NM_000804; ENST00000442948; ENST00000545379; ENST00000546166; ENST00000611028; ENST00000612844; OTTHUMT00000396739; OTTHUMT00000396740; OTTHUMT00000396741; OTTHUMT00000396742	GO:0005576; GO:0016020; GO:0019898	NM_000804; ENST00000442948; ENST00000545379; ENST00000546166; ENST00000611028; ENST00000612844; OTTHUMT00000396739; OTTHUMT00000396740; OTTHUMT00000396741; OTTHUMT00000396742	GO:0005542				main	Multiple_Complex	Hs01549266_g1
TC1800009112.hg.1	8.18	9.79	-3.06	3.06	1	1	8.18	9.79	MBP	myelin basic protein	chr18	-	Multiple_Complex	76978827	77133683	NM_001025081; NM_001025090; NM_001025092; NM_001025100; NM_001025101; NM_002385; ENST00000354542; ENST00000355994; ENST00000359645; ENST00000382582; ENST00000397860; ENST00000397863; ENST00000397865; ENST00000397866; ENST00000397868; ENST00000397869; ENST00000397875; ENST00000447114; ENST00000459948; ENST00000467108; ENST00000473302; ENST00000482445; ENST00000483025; ENST00000484548; ENST00000487…	RefSeq; ENSEMBL; GenBank; Havana transcript; ccdsGene; Ace View; UCSC Genes; lncRNAWiki; NONCODE							NM_001025081; NM_001025090; NM_001025092; NM_001025100; NM_001025101; NM_002385; ENST00000354542; ENST00000355994; ENST00000359645; ENST00000382582; ENST00000397860; ENST00000397863; ENST00000397865; ENST00000397866; ENST00000397868; ENST00000397869; ENST00000397875; ENST00000447114; ENST00000459948; ENST00000467108; ENST00000473302; ENST00000482445; ENST00000483025; ENST00000484548; ENST00000487…	GenMAPP	MAPK_Cascade	main	Multiple_Complex	Hs00921943_m1
TC0X00006446.hg.1	11.79	13.4	-3.05	3.05	1	1	11.79	13.4	CSF2RA	colony stimulating factor 2 receptor, alpha, low-affinity (granulocyte-macrophage)	chrX	+	Multiple_Complex	1268800	1310381	NM_001161529; NM_001161530; NM_001161531; NM_001161532; NM_006140; NM_172245; NM_172246; NM_172247; ENST00000355432; ENST00000355805; ENST00000381500; ENST00000381509; ENST00000381524; ENST00000381529; ENST00000412290; ENST00000417535; ENST00000419094; ENST00000432318; ENST00000475259; ENST00000477940; ENST00000478256; ENST00000481245; ENST00000486791; ENST00000491683; ENST00000493312; ENST000004…	RefSeq; ENSEMBL; GenBank; UCSC Genes; ccdsGene; Guo; circbase; lncRNAWiki; NONCODE; Havana transcript			NM_001161529; NM_001161530; NM_001161531; NM_001161532; NM_006140; NM_172245; NM_172246; NM_172247; ENST00000355432; ENST00000355805; ENST00000381500; ENST00000381509; ENST00000381524; ENST00000381529; ENST00000412290; ENST00000417535; ENST00000419094; ENST00000432318; ENST00000475259; ENST00000477940; ENST00000478256; ENST00000481245; ENST00000486791; ENST00000491683; ENST00000493312; ENST000004…	GO:0005576; GO:0005622; GO:0005886; GO:0005887; GO:0016020; GO:0016021	NM_001161529; NM_001161530; NM_001161531; NM_001161532; NM_006140; NM_172245; NM_172246; NM_172247; ENST00000355432; ENST00000355805; ENST00000381500; ENST00000381509; ENST00000381524; ENST00000381529; ENST00000412290; ENST00000417535; ENST00000419094; ENST00000432318; ENST00000475259; ENST00000477940; ENST00000478256; ENST00000481245; ENST00000486791; ENST00000491683; ENST00000493312; ENST000004…	GO:0004872; GO:0004902; GO:0005515; GO:0051916; GO:0004896				main	Multiple_Complex	Hs00531296_g1
TC0500009743.hg.1	9.41	11.01	-3.04	3.04	1	1	9.41	11.01	BTNL8	butyrophilin-like 8	chr5	+	Multiple_Complex	180899077	180950906	NM_001040462; NM_001159707; NM_001159708; NM_001159709; NM_001159710; NM_024850; ENST00000231229; ENST00000340184; ENST00000400707; ENST00000503543; ENST00000505126; ENST00000508408; ENST00000511704; ENST00000513442; ENST00000514448; ENST00000533815; ENST00000610640; BC119696; OTTHUMT00000253528; OTTHUMT00000368440; OTTHUMT00000368441; OTTHUMT00000368442; OTTHUMT00000368443; OTTHUMT00000368444; O…	RefSeq; ENSEMBL; GenBank; Havana transcript; UCSC Genes; Ace View; ccdsGene; lncRNAWiki; NONCODE	NM_001040462; NM_001159707; NM_001159708; NM_001159709; NM_001159710; NM_024850; ENST00000231229; ENST00000340184; ENST00000400707; ENST00000503543; ENST00000505126; ENST00000508408; ENST00000511704; ENST00000513442; ENST00000514448; ENST00000533815; ENST00000610640; BC119696; OTTHUMT00000253528; OTTHUMT00000368440; OTTHUMT00000368441; OTTHUMT00000368442; OTTHUMT00000368443; OTTHUMT00000368444; O…	GO:0002250; GO:0002376	NM_001040462; NM_001159707; NM_001159708; NM_001159709; NM_001159710; NM_024850; ENST00000231229; ENST00000340184; ENST00000400707; ENST00000503543; ENST00000505126; ENST00000508408; ENST00000511704; ENST00000513442; ENST00000514448; ENST00000533815; ENST00000610640; BC119696; OTTHUMT00000253528; OTTHUMT00000368440; OTTHUMT00000368441; OTTHUMT00000368442; OTTHUMT00000368443; OTTHUMT00000368444; O…	GO:0016021; GO:0016020	NM_001040462; NM_001159707; NM_001159708; NM_001159709; NM_001159710; NM_024850; ENST00000231229; ENST00000340184; ENST00000400707; ENST00000503543; ENST00000505126; ENST00000508408; ENST00000511704; ENST00000513442; ENST00000514448; ENST00000533815; ENST00000610640; BC119696; OTTHUMT00000253528; OTTHUMT00000368440; OTTHUMT00000368441; OTTHUMT00000368442; OTTHUMT00000368443; OTTHUMT00000368444; O…	GO:0005515				main	Multiple_Complex	Hs01063697_m1
TC1400008349.hg.1	7.06	8.67	-3.04	3.04	1	1	7.06	8.67	TECPR2	tectonin beta-propeller repeat containing 2	chr14	+	Multiple_Complex	102362962	102502481	NM_001172631; NM_014844; ENST00000359520; ENST00000557786; ENST00000558678; ENST00000559124; ENST00000560060; ENST00000561099; ENST00000561228; BC136647; BC142667; BC142715; BC151230; OTTHUMT00000415056; OTTHUMT00000415839; OTTHUMT00000415840; OTTHUMT00000415841; OTTHUMT00000415842; OTTHUMT00000415843; OTTHUMT00000415844; uc001ylw.2; CCDS32162.1; CCDS58337.1; hsa_circ_0004275; hsa_circ_0033406; h…	RefSeq; ENSEMBL; GenBank; Havana transcript; UCSC Genes; ccdsGene; circbase; Guo; NONCODE	NM_001172631; NM_014844; ENST00000359520; ENST00000557786; ENST00000558678; ENST00000559124; ENST00000560060; ENST00000561099; ENST00000561228; BC136647; BC142667; BC142715; BC151230; OTTHUMT00000415056; OTTHUMT00000415839; OTTHUMT00000415840; OTTHUMT00000415841; OTTHUMT00000415842; OTTHUMT00000415843; OTTHUMT00000415844; uc001ylw.2	GO:0006914			NM_001172631; NM_014844; ENST00000359520; ENST00000557786; ENST00000558678; ENST00000559124; ENST00000560060; ENST00000561099; ENST00000561228; BC136647; BC142667; BC142715; BC151230; OTTHUMT00000415056; OTTHUMT00000415839; OTTHUMT00000415840; OTTHUMT00000415841; OTTHUMT00000415842; OTTHUMT00000415843; OTTHUMT00000415844; uc001ylw.2	GO:0005515				main	Multiple_Complex	Hs00915296_m1
TC1400009147.hg.1	11.54	13.14	-3.04	3.04	1	1	11.54	13.14	PYGL	phosphorylase, glycogen, liver	chr14	-	Multiple_Complex	50857891	50944736	NM_001163940; NM_002863; ENST00000216392; ENST00000528757; ENST00000530336; ENST00000532107; ENST00000532462; ENST00000544180; ENST00000553872; BC009895; BC082229; BC095850; BC110791; OTTHUMT00000390652; OTTHUMT00000390653; OTTHUMT00000390654; OTTHUMT00000390655; OTTHUMT00000390657; OTTHUMT00000411197; OTTHUMT00000411198; CCDS32080.1; CCDS53894.1; hsa_circ_0031882; hsa_circ_0031883; hsa_circ_0031…	RefSeq; ENSEMBL; GenBank; Havana transcript; ccdsGene; circbase; Ace View; UCSC Genes	NM_001163940; NM_002863; ENST00000216392; ENST00000528757; ENST00000530336; ENST00000532107; ENST00000532462; ENST00000544180; ENST00000553872; BC009895; BC082229; BC095850; BC110791; OTTHUMT00000390652; OTTHUMT00000390653; OTTHUMT00000390654; OTTHUMT00000390655; OTTHUMT00000390657; OTTHUMT00000411197; OTTHUMT00000411198	GO:0005975; GO:0005977; GO:0005980; GO:0006006; GO:0006015; GO:0042593; GO:0044281; GO:0070266; GO:0008152	NM_001163940; NM_002863; ENST00000216392; ENST00000528757; ENST00000530336; ENST00000532107; ENST00000532462; ENST00000544180; ENST00000553872; BC009895; BC082229; BC095850; BC110791; OTTHUMT00000390652; OTTHUMT00000390653; OTTHUMT00000390654; OTTHUMT00000390655; OTTHUMT00000390657; OTTHUMT00000411197; OTTHUMT00000411198	GO:0005737; GO:0005829; GO:0005886; GO:0070062			NM_001163940; NM_002863; ENST00000216392; ENST00000528757; ENST00000530336; ENST00000532107; ENST00000532462; ENST00000544180; ENST00000553872; BC009895; BC082229; BC095850; BC110791; OTTHUMT00000390652; OTTHUMT00000390653; OTTHUMT00000390654; OTTHUMT00000390655; OTTHUMT00000390657; OTTHUMT00000411197; OTTHUMT00000411198	GenMAPP	Glycogen_Metabolism	main	Multiple_Complex	Hs00958094_g1
TC1700011903.hg.1	4.66	6.26	-3.04	3.04	1	1	4.66	6.26	SOCS3	suppressor of cytokine signaling 3	chr17	-	Coding	78356777	78360079	NM_003955; ENST00000330871; ENST00000587578; BC060858; CCDS11756.1; uc002jvl.4; uc060kud.1; OTTHUMT00000437300; OTTHUMT00000438457	RefSeq; ENSEMBL; GenBank; ccdsGene; UCSC Genes; Havana transcript	NM_003955; ENST00000330871; ENST00000587578; BC060858; OTTHUMT00000437300; OTTHUMT00000438457	GO:0001666; GO:0007259; GO:0007568; GO:0009408; GO:0010332; GO:0016567; GO:0019221; GO:0031100; GO:0032094; GO:0032355; GO:0032496; GO:0032570; GO:0032868; GO:0040008; GO:0042493; GO:0043066; GO:0045597; GO:0046627; GO:0050728; GO:0051384; GO:0060333; GO:0060334; GO:0060337; GO:0060338; GO:0060397; GO:0060670; GO:0060674; GO:0060707; GO:0060708; GO:1904030; GO:0001932; GO:0009617; GO:0009725; GO:…	NM_003955; ENST00000330871; ENST00000587578; BC060858; OTTHUMT00000437300; OTTHUMT00000438457	GO:0005829; GO:0005737; GO:0005622	NM_003955; ENST00000330871; ENST00000587578; BC060858; OTTHUMT00000437300	GO:0004860; GO:0005515				main	Coding	Hs00269575_s1
TC1700012457.hg.1	6.22	7.82	-3.04	3.04	1	1	6.22	7.82	AXIN2	axin 2	chr17	-	Multiple_Complex	65528563	65561647	NM_004655; ENST00000307078; ENST00000375702; ENST00000544103; ENST00000577278; ENST00000578251; ENST00000580513; ENST00000585045; ENST00000611991; ENST00000618960; BC101533; BC143244; OTTHUMT00000445900; OTTHUMT00000445901; OTTHUMT00000445902; OTTHUMT00000445903; OTTHUMT00000445904; OTTHUMT00000445905; OTTHUMT00000445906; CCDC46andAXIN2.iAug10; CCDS11662.1; hsa_circ_0045348; hsa_circ_0045349; hsa…	RefSeq; ENSEMBL; GenBank; Havana transcript; Ace View; ccdsGene; circbase; UCSC Genes; Guo; lncRNAWiki; NONCODE			NM_004655; ENST00000307078; ENST00000375702; ENST00000544103; ENST00000577278; ENST00000578251; ENST00000580513; ENST00000585045; ENST00000611991; ENST00000618960; BC101533; BC143244; OTTHUMT00000445900; OTTHUMT00000445901; OTTHUMT00000445902; OTTHUMT00000445903; OTTHUMT00000445904; OTTHUMT00000445905; OTTHUMT00000445906	GO:0005634; GO:0005654; GO:0005737; GO:0005794; GO:0005813; GO:0005829; GO:0005881; GO:0005886; GO:0005938; GO:0014069; GO:0015630; GO:0016023; GO:0030877	NM_004655; ENST00000307078; ENST00000375702; ENST00000544103; ENST00000577278; ENST00000578251; ENST00000580513; ENST00000585045; ENST00000611991; ENST00000618960; BC101533; BC143244; OTTHUMT00000445900; OTTHUMT00000445901; OTTHUMT00000445902; OTTHUMT00000445903; OTTHUMT00000445904; OTTHUMT00000445905; OTTHUMT00000445906	GO:0005096; GO:0005515; GO:0008013; GO:0019899; GO:0019901; GO:0031625; GO:0070016; GO:0070411				main	Multiple_Complex	Hs00610342_m1
TC0500008156.hg.1	9.91	11.51	-3.03	3.03	1	1	9.91	11.51	ERAP2	endoplasmic reticulum aminopeptidase 2	chr5	+	Multiple_Complex	96875939	96919716	NM_001130140; NM_022350; ENST00000379904; ENST00000437043; ENST00000507346; ENST00000508077; ENST00000510309; ENST00000510373; ENST00000512869; ENST00000513084; ENST00000513368; ENST00000515095; ENST00000515387; BC065240; OTTHUMT00000250623; OTTHUMT00000370864; OTTHUMT00000370865; OTTHUMT00000370867; OTTHUMT00000370868; OTTHUMT00000370869; OTTHUMT00000370870; OTTHUMT00000370871; OTTHUMT0000037087…	RefSeq; ENSEMBL; GenBank; Havana transcript; ccdsGene; Ace View; circbase; UCSC Genes; Guo; lncRNAWiki; NONCODE	NM_001130140; NM_022350; ENST00000379904; ENST00000437043; ENST00000507346; ENST00000508077; ENST00000510309; ENST00000510373; ENST00000512869; ENST00000513084; ENST00000513368; ENST00000515095; ENST00000515387; BC065240; OTTHUMT00000250623; OTTHUMT00000370864; OTTHUMT00000370865; OTTHUMT00000370867; OTTHUMT00000370868; OTTHUMT00000370869; OTTHUMT00000370870; OTTHUMT00000370871; OTTHUMT0000037087…	GO:0002250; GO:0002474; GO:0006508; GO:0008217; GO:0019885; GO:0043171; GO:0002376	NM_001130140; NM_022350; ENST00000379904; ENST00000437043; ENST00000507346; ENST00000508077; ENST00000510309; ENST00000510373; ENST00000512869; ENST00000513084; ENST00000513368; ENST00000515095; ENST00000515387; BC065240; OTTHUMT00000250623; OTTHUMT00000370864; OTTHUMT00000370865; OTTHUMT00000370867; OTTHUMT00000370868; OTTHUMT00000370869; OTTHUMT00000370870; OTTHUMT00000370871; OTTHUMT0000037087…	GO:0005788; GO:0005789; GO:0016021; GO:0005783; GO:0016020	NM_001130140; NM_022350; ENST00000379904; ENST00000437043; ENST00000507346; ENST00000508077; ENST00000510309; ENST00000510373; ENST00000512869; ENST00000513084; ENST00000513368; ENST00000515095; ENST00000515387; BC065240; OTTHUMT00000250623; OTTHUMT00000370864; OTTHUMT00000370865; OTTHUMT00000370867; OTTHUMT00000370868; OTTHUMT00000370869; OTTHUMT00000370870; OTTHUMT00000370871; OTTHUMT0000037087…	GO:0004177; GO:0008237; GO:0008270; GO:0042277; GO:0070006; GO:0008233; GO:0016787; GO:0046872				main	Multiple_Complex	Hs01073639_m1
TC1700012200.hg.1	7.85	6.24	3.03	3.03	1	1	7.85	6.24	CCDC144A	coiled-coil domain containing 144A	chr17	+	Multiple_Complex	16689537	16777881	NM_014695; NR_130142; ENST00000328495; ENST00000340621; ENST00000360495; ENST00000360524; ENST00000399264; ENST00000399273; ENST00000420937; ENST00000428950; ENST00000436374; ENST00000463809; ENST00000470068; ENST00000478303; BC133019; BC144224; BC144225; OTTHUMT00000131112; OTTHUMT00000131113; OTTHUMT00000131114; OTTHUMT00000131115; OTTHUMT00000131116; OTTHUMT00000131117; OTTHUMT00000131118; OTT…	RefSeq; ENSEMBL; GenBank; Havana transcript; ccdsGene; UCSC Genes; lncRNAWiki; NONCODE										main	Multiple_Complex	Hs00417617_m1
TC2200008189.hg.1	9.26	7.66	3.03	3.03	1	1	9.26	7.66	DERL3	derlin 3	chr22	-	Multiple_Complex	23834503	23839128	NM_001002862; NM_001135751; NM_198440; ENST00000290730; ENST00000318109; ENST00000404056; ENST00000406855; ENST00000464023; ENST00000464034; ENST00000464110; ENST00000476077; ENST00000488272; ENST00000493596; BC057830; OTTHUMT00000319904; OTTHUMT00000319905; OTTHUMT00000319906; OTTHUMT00000319907; OTTHUMT00000319908; OTTHUMT00000319909; OTTHUMT00000319910; OTTHUMT00000319911; OTTHUMT00000319912; …	RefSeq; ENSEMBL; GenBank; Havana transcript; ccdsGene; Ace View; UCSC Genes; lncRNAWiki; NONCODE	NM_001002862; NM_001135751; NM_198440; ENST00000290730; ENST00000318109; ENST00000404056; ENST00000406855; ENST00000464023; ENST00000464034; ENST00000464110; ENST00000476077; ENST00000488272; ENST00000493596; BC057830; OTTHUMT00000319904; OTTHUMT00000319905; OTTHUMT00000319906; OTTHUMT00000319907; OTTHUMT00000319908; OTTHUMT00000319909; OTTHUMT00000319910; OTTHUMT00000319911; OTTHUMT00000319912; …	GO:0018279; GO:0030433; GO:0030968; GO:1904153	NM_001002862; NM_001135751; NM_198440; ENST00000290730; ENST00000318109; ENST00000404056; ENST00000406855; ENST00000464023; ENST00000464034; ENST00000464110; ENST00000476077; ENST00000488272; ENST00000493596; BC057830; OTTHUMT00000319904; OTTHUMT00000319905; OTTHUMT00000319906; OTTHUMT00000319907; OTTHUMT00000319908; OTTHUMT00000319909; OTTHUMT00000319910; OTTHUMT00000319911; OTTHUMT00000319912; …	GO:0030176; GO:0005783; GO:0005789; GO:0016020; GO:0016021	NM_001002862; NM_001135751; NM_198440; ENST00000290730; ENST00000318109; ENST00000404056; ENST00000406855; ENST00000464023; ENST00000464034; ENST00000464110; ENST00000476077; ENST00000488272; ENST00000493596; BC057830; OTTHUMT00000319904; OTTHUMT00000319905; OTTHUMT00000319906; OTTHUMT00000319907; OTTHUMT00000319908; OTTHUMT00000319909; OTTHUMT00000319910; OTTHUMT00000319911; OTTHUMT00000319912; …	GO:0005515				main	Multiple_Complex	Hs00992982_g1
TC0200007803.hg.1	6.75	8.34	-3.02	3.02	1	1	6.75	8.34	LGALSL	lectin, galactoside-binding-like	chr2	+	Multiple_Complex	64453969	64469986	NM_014181; ENST00000238875; ENST00000409537; ENST00000420552; ENST00000462737; ENST00000464281; BC036082; BC062691; OTTHUMT00000251731; OTTHUMT00000327289; OTTHUMT00000327290; OTTHUMT00000327306; OTTHUMT00000327307; CCDS1877.1; HSPC159.bAug10; uc002scy.5; uc061jtl.1; uc061jtm.1; uc061jtn.1; uc061jto.1; NONHSAT071116; NONHSAT071117	RefSeq; ENSEMBL; GenBank; Havana transcript; ccdsGene; Ace View; UCSC Genes; lncRNAWiki			NM_014181; ENST00000238875; ENST00000409537; ENST00000420552; ENST00000462737; ENST00000464281; BC036082; BC062691; OTTHUMT00000251731; OTTHUMT00000327289; OTTHUMT00000327290; OTTHUMT00000327306; OTTHUMT00000327307	GO:0005622	NM_014181; ENST00000238875; ENST00000409537; ENST00000420552; ENST00000462737; ENST00000464281; BC036082; BC062691; OTTHUMT00000251731; OTTHUMT00000327289; OTTHUMT00000327290; OTTHUMT00000327306; OTTHUMT00000327307	GO:0005515; GO:0030246				main	Multiple_Complex	Hs01107979_g1
TC0600011644.hg.1	6.73	8.32	-3.01	3.01	1	1	6.73	8.32	SRPK1	SRSF protein kinase 1	chr6	-	Multiple_Complex	35832966	35921342	NM_003137; NR_034069; ENST00000346162; ENST00000361690; ENST00000373821; ENST00000373822; ENST00000373825; ENST00000423325; ENST00000502969; ENST00000505885; ENST00000507292; ENST00000507909; ENST00000508473; ENST00000510290; ENST00000512445; ENST00000513367; BC038292; OTTHUMT00000040319; OTTHUMT00000040320; OTTHUMT00000040321; OTTHUMT00000370429; OTTHUMT00000370434; OTTHUMT00000370435; OTTHUMT00…	RefSeq; ENSEMBL; GenBank; Havana transcript; ccdsGene; circbase; Ace View; UCSC Genes; Guo; lncRNAWiki; NONCODE			NM_003137; NR_034069; ENST00000346162; ENST00000361690; ENST00000373821; ENST00000373822; ENST00000373825; ENST00000423325; ENST00000502969; ENST00000505885; ENST00000507292; ENST00000507909; ENST00000508473; ENST00000510290; ENST00000512445; ENST00000513367; BC038292; OTTHUMT00000040319; OTTHUMT00000040320; OTTHUMT00000040321; OTTHUMT00000370429; OTTHUMT00000370434; OTTHUMT00000370435; OTTHUMT00…	GO:0005634; GO:0005737; GO:0005783; GO:0005886; GO:0016363; GO:0043231; GO:0005654			NM_003137; NR_034069; ENST00000346162; ENST00000361690; ENST00000373821; ENST00000373822; ENST00000373825; ENST00000423325; ENST00000502969; ENST00000505885; ENST00000507292; ENST00000507909; ENST00000508473; ENST00000510290; ENST00000512445; ENST00000513367; BC038292; OTTHUMT00000040319; OTTHUMT00000040320; OTTHUMT00000040321; OTTHUMT00000370429; OTTHUMT00000370434; OTTHUMT00000370435; OTTHUMT00…	GenMAPP	mRNA_processing_Reactome	main	Multiple_Complex	Hs00917640_g1
TC1600008139.hg.1	4.7	6.29	-3.01	3.01	1	1	4.7	6.29	CES4A	carboxylesterase 4A	chr16	+	Multiple_Complex	66988589	67009758	NM_001190201; NM_001190202; NM_173815; ENST00000397205; ENST00000535543; ENST00000535696; ENST00000535948; ENST00000538199; ENST00000540579; ENST00000540947; ENST00000543561; ENST00000544478; ENST00000544986; ENST00000567587; BC166638; CCDS42174.3; CCDS54024.1; CCDS54025.1; CES8.jAug10; hsa_circ_0039778; hsa_circ_0039779; hsa_circ_0039780; uc002eqy.4; uc010vix.3; uc010viy.3; uc059vnb.1; uc059vnc.…	RefSeq; ENSEMBL; GenBank; ccdsGene; Ace View; circbase; UCSC Genes; lncRNAWiki; NONCODE; Havana transcript	NM_001190201; NM_001190202; NM_173815; ENST00000397205; ENST00000535543; ENST00000535696; ENST00000535948; ENST00000538199; ENST00000540579; ENST00000540947; ENST00000543561; ENST00000544478; ENST00000544986; ENST00000567587; OTTHUMT00000396715; OTTHUMT00000396716; OTTHUMT00000396717	GO:0008152	NM_001190201; NM_001190202; NM_173815; ENST00000397205; ENST00000535543; ENST00000535696; ENST00000535948; ENST00000538199; ENST00000540579; ENST00000540947; ENST00000543561; ENST00000544478; ENST00000544986; ENST00000567587; OTTHUMT00000396715; OTTHUMT00000396716; OTTHUMT00000396717	GO:0005615; GO:0005576	NM_001190201; NM_001190202; NM_173815; ENST00000397205; ENST00000535543; ENST00000535696; ENST00000535948; ENST00000538199; ENST00000540579; ENST00000540947; ENST00000543561; ENST00000544478; ENST00000544986; ENST00000567587; OTTHUMT00000396715; OTTHUMT00000396716; OTTHUMT00000396717	GO:0052689; GO:0016787				main	Multiple_Complex	Hs00545137_m1
TC0100007540.hg.1	8.38	9.97	-3	3	1	1	8.38	9.97	THEMIS2	thymocyte selection associated family member 2	chr1	+	Multiple_Complex	27872543	27886685	NM_001039477; NM_001105556; NM_001286113; NM_001286115; NM_004848; ENST00000328928; ENST00000373921; ENST00000373925; ENST00000373927; ENST00000427466; ENST00000442118; ENST00000456990; ENST00000466068; ENST00000467258; ENST00000482828; ENST00000492877; OTTHUMT00000010529; OTTHUMT00000011148; OTTHUMT00000011149; OTTHUMT00000011150; OTTHUMT00000011151; OTTHUMT00000011152; OTTHUMT00000011153; OTTHU…	RefSeq; ENSEMBL; Havana transcript; ccdsGene; UCSC Genes; lncRNAWiki; NONCODE	NM_001039477; NM_001105556; NM_001286113; NM_001286115; NM_004848; ENST00000328928; ENST00000373921; ENST00000373925; ENST00000373927; ENST00000427466; ENST00000442118; ENST00000456990; ENST00000466068; ENST00000467258; ENST00000482828; ENST00000492877; OTTHUMT00000010529; OTTHUMT00000011148; OTTHUMT00000011149; OTTHUMT00000011150; OTTHUMT00000011151; OTTHUMT00000011152; OTTHUMT00000011153; OTTHU…	GO:0006954; GO:0007155; GO:0050852; GO:0002376	NM_001039477; NM_001105556; NM_001286113; NM_001286115; NM_004848; ENST00000328928; ENST00000373921; ENST00000373925; ENST00000373927; ENST00000427466; ENST00000442118; ENST00000456990; ENST00000466068; ENST00000467258; ENST00000482828; ENST00000492877; OTTHUMT00000010529; OTTHUMT00000011148; OTTHUMT00000011149; OTTHUMT00000011150; OTTHUMT00000011151; OTTHUMT00000011152; OTTHUMT00000011153; OTTHU…	GO:0005634; GO:0005737	NM_001039477; NM_001105556; NM_001286113; NM_001286115; NM_004848; ENST00000328928; ENST00000373921; ENST00000373925; ENST00000373927; ENST00000427466; ENST00000442118; ENST00000456990; ENST00000466068; ENST00000467258; ENST00000482828; ENST00000492877; OTTHUMT00000010529; OTTHUMT00000011148; OTTHUMT00000011149; OTTHUMT00000011150; OTTHUMT00000011151; OTTHUMT00000011152; OTTHUMT00000011153; OTTHU…	GO:0005515				main	Multiple_Complex	Hs00985482_m1
TC0200008005.hg.1	8.17	9.75	-3	3	1	1	8.17	9.75	DYSF	dysferlin	chr2	+	Multiple_Complex	71453623	71686768	NM_001130455; NM_001130976; NM_001130977; NM_001130978; NM_001130979; NM_001130980; NM_001130981; NM_001130982; NM_001130983; NM_001130984; NM_001130985; NM_001130986; NM_001130987; NM_003494; ENST00000258104; ENST00000394120; ENST00000409366; ENST00000409582; ENST00000409651; ENST00000409744; ENST00000409762; ENST00000410020; ENST00000410041; ENST00000413539; ENST00000429174; ENST00000461565; EN…	RefSeq; ENSEMBL; Havana transcript; GenBank; ccdsGene; Ace View; circbase; UCSC Genes; lncRNAWiki; NONCODE	NM_001130455; NM_001130976; NM_001130977; NM_001130978; NM_001130979; NM_001130980; NM_001130981; NM_001130982; NM_001130983; NM_001130984; NM_001130985; NM_001130986; NM_001130987; NM_003494; ENST00000258104; ENST00000394120; ENST00000409366; ENST00000409582; ENST00000409651; ENST00000409744; ENST00000409762; ENST00000410020; ENST00000410041; ENST00000413539; ENST00000429174; ENST00000461565; EN…	GO:0001778; GO:0006906			NM_001130455; NM_001130976; NM_001130977; NM_001130978; NM_001130979; NM_001130980; NM_001130981; NM_001130982; NM_001130983; NM_001130984; NM_001130985; NM_001130986; NM_001130987; NM_003494; ENST00000258104; ENST00000394120; ENST00000409366; ENST00000409582; ENST00000409651; ENST00000409744; ENST00000409762; ENST00000410020; ENST00000410041; ENST00000413539; ENST00000429174; ENST00000461565; EN…	GO:0005509; GO:0005515; GO:0005543; GO:0005544; GO:0008289; GO:0046872				main	Multiple_Complex	Hs01002518_g1
TC0300011517.hg.1	13.5	15.08	-3	3	1	1	13.5	15.08	PROK2	prokineticin 2	chr3	-	Coding	71771655	71785206	NM_001126128; NM_021935; ENST00000295619; ENST00000353065; BC069395; BC096695; BC098110; BC098162; OTTHUMT00000352301; OTTHUMT00000352302; CCDS2916.1; CCDS46868.1; PROK2.aAug10; uc003doz.5; uc003dpa.5	RefSeq; ENSEMBL; GenBank; Havana transcript; ccdsGene; Ace View; UCSC Genes	NM_001126128; NM_021935; ENST00000295619; ENST00000353065; BC069395; BC096695; BC098110; BC098162; OTTHUMT00000352301; OTTHUMT00000352302	GO:0000187; GO:0001525; GO:0006935; GO:0006954; GO:0007186; GO:0007204; GO:0007218; GO:0007283; GO:0007623; GO:0008283; GO:0008284; GO:0019233; GO:0043066; GO:0045765; GO:0045987; GO:0048511	NM_001126128; NM_021935; ENST00000295619; ENST00000353065; BC069395; BC096695; BC098110; BC098162; OTTHUMT00000352301; OTTHUMT00000352302	GO:0005576; GO:0005829	NM_001126128; NM_021935; ENST00000295619; ENST00000353065; BC069395; BC096695; BC098110; BC098162; OTTHUMT00000352301; OTTHUMT00000352302	GO:0001664				main	Coding	Hs01587689_m1
TC0X00011226.hg.1	5.17	6.75	-3	3	1	1	5.17	6.75	F8	coagulation factor VIII, procoagulant component	chrX	-	Multiple_Complex	154835788	155026940	NM_000132; NM_019863; ENST00000330287; ENST00000360256; ENST00000423959; ENST00000453950; ENST00000483822; OTTHUMT00000058869; OTTHUMT00000082826; OTTHUMT00000083107; OTTHUMT00000156197; OTTHUMT00000316136; BC166700; CCDS35457.1; CCDS44026.1; F8.gAug10; hsa_circ_0092155; hsa_circ_0092156; uc004fms.4; uc004fmt.4; uc011mzx.2; uc065cjd.1; uc065cje.1	RefSeq; ENSEMBL; Havana transcript; GenBank; ccdsGene; Ace View; circbase; UCSC Genes	NM_000132; NM_019863; ENST00000330287; ENST00000360256; ENST00000423959; ENST00000453950; ENST00000483822; OTTHUMT00000058869; OTTHUMT00000082826; OTTHUMT00000083107; OTTHUMT00000156197; OTTHUMT00000316136	GO:0002576; GO:0006888; GO:0006953; GO:0007596; GO:0007597; GO:0018279; GO:0030168; GO:0043687; GO:0044267; GO:0048208; GO:0055114; GO:0061024; GO:0007599; GO:0006508	NM_000132; NM_019863; ENST00000330287; ENST00000360256; ENST00000423959; ENST00000453950; ENST00000483822; OTTHUMT00000058869; OTTHUMT00000082826; OTTHUMT00000083107; OTTHUMT00000156197; OTTHUMT00000316136	GO:0000139; GO:0005576; GO:0005615; GO:0005788; GO:0005886; GO:0030134; GO:0031093; GO:0033116	NM_000132; NM_019863; ENST00000330287; ENST00000360256; ENST00000423959; ENST00000453950; ENST00000483822; OTTHUMT00000058869; OTTHUMT00000082826; OTTHUMT00000083107; OTTHUMT00000156197; OTTHUMT00000316136	GO:0005507; GO:0005515; GO:0016491; GO:0046872; GO:0004252	NM_000132; NM_019863; ENST00000330287; ENST00000360256; ENST00000423959; ENST00000453950; ENST00000483822; OTTHUMT00000058869; OTTHUMT00000082826; OTTHUMT00000083107; OTTHUMT00000156197; OTTHUMT00000316136	GenMAPP	Blood_Clotting_Cascade	main	Multiple_Complex	Hs00252034_m1
TC1900011842.hg.1	6.86	5.27	3	3	1	1	6.86	5.27	DIRAS1	DIRAS family, GTP-binding RAS-like 1	chr19	-	Coding	2714567	2721418	NM_145173; ENST00000323469; ENST00000585334; ENST00000588128; BC030660; CCDS12092.1; SLC39A3andDIRAS1.cAug10-unspliced; uc002lwf.4; uc060rlm.1; uc060rln.1; OTTHUMT00000451350; OTTHUMT00000451351; OTTHUMT00000451352	RefSeq; ENSEMBL; GenBank; ccdsGene; Ace View; UCSC Genes; Havana transcript	NM_145173; ENST00000323469; ENST00000585334; ENST00000588128; BC030660; OTTHUMT00000451350; OTTHUMT00000451351; OTTHUMT00000451352	GO:0007264; GO:0043406; GO:0007165; GO:0015031; GO:0008152	NM_145173; ENST00000323469; ENST00000585334; ENST00000588128; BC030660; OTTHUMT00000451350; OTTHUMT00000451351; OTTHUMT00000451352	GO:0005622; GO:0005886; GO:0016020	NM_145173; ENST00000323469; ENST00000585334; ENST00000588128; BC030660; OTTHUMT00000451350; OTTHUMT00000451351; OTTHUMT00000451352	GO:0003924; GO:0005525; GO:0051019; GO:0000166				main	Coding	Hs05005033_s1
TC0300012815.hg.1	13.14	14.71	-2.97	2.97	1	1	13.14	14.71	P2RY13	purinergic receptor P2Y, G-protein coupled, 13	chr3	-	Coding	151326308	151329549	NM_176894; ENST00000325602; BC041116; OTTHUMT00000341468; CCDS3158.2; uc003eyv.3	RefSeq; ENSEMBL; GenBank; Havana transcript; ccdsGene; UCSC Genes	NM_176894; ENST00000325602; BC041116; OTTHUMT00000341468	GO:0007186; GO:0007194; GO:0035589; GO:0071407; GO:0007165; GO:0008150	NM_176894; ENST00000325602; BC041116; OTTHUMT00000341468	GO:0005783; GO:0005886; GO:0005887; GO:0016020; GO:0016021	NM_176894; ENST00000325602; BC041116; OTTHUMT00000341468	GO:0045028; GO:0004871; GO:0004930	NM_176894; ENST00000325602; BC041116; OTTHUMT00000341468	GenMAPP	GPCRDB_Class_A_Rhodopsin-like; GPCRDB_Other	main	Coding	Hs00256749_s1
TC1100007684.hg.1	6.68	5.11	2.97	2.97	1	1	6.68	5.11	SERPING1	serpin peptidase inhibitor, clade G (C1 inhibitor), member 1	chr11	+	Multiple_Complex	57597387	57614853	NM_000062; NM_001032295; ENST00000278407; ENST00000340687; ENST00000378323; ENST00000378324; ENST00000403558; ENST00000405496; ENST00000457869; ENST00000528996; ENST00000530113; ENST00000531133; ENST00000531605; ENST00000531797; ENST00000619430; BC011171; OTTHUMT00000317465; OTTHUMT00000317466; OTTHUMT00000317467; OTTHUMT00000317468; OTTHUMT00000317469; OTTHUMT00000393355; OTTHUMT00000393356; OTT…	RefSeq; ENSEMBL; GenBank; Havana transcript; ccdsGene; circbase; UCSC Genes; lncRNAWiki; NONCODE			NM_000062; NM_001032295; ENST00000278407; ENST00000340687; ENST00000378323; ENST00000378324; ENST00000403558; ENST00000405496; ENST00000457869; ENST00000528996; ENST00000530113; ENST00000531133; ENST00000531605; ENST00000531797; ENST00000619430; BC011171; OTTHUMT00000317465; OTTHUMT00000317466; OTTHUMT00000317467; OTTHUMT00000317468; OTTHUMT00000317469; OTTHUMT00000393355; OTTHUMT00000393356; OTT…	GO:0005576; GO:0005615; GO:0031093; GO:0070062; GO:0072562	NM_000062; NM_001032295; ENST00000278407; ENST00000340687; ENST00000378323; ENST00000378324; ENST00000403558; ENST00000405496; ENST00000457869; ENST00000528996; ENST00000530113; ENST00000531133; ENST00000531605; ENST00000531797; ENST00000619430; BC011171; OTTHUMT00000317465; OTTHUMT00000317466; OTTHUMT00000317467; OTTHUMT00000317468; OTTHUMT00000317469; OTTHUMT00000393355; OTTHUMT00000393356; OTT…	GO:0004867; GO:0005515; GO:0030414				main	Multiple_Complex	Hs00934330_m1
TC0900008150.hg.1	10.83	9.26	2.96	2.96	1	1	10.83	9.26	TMOD1	tropomodulin 1	chr9	+	Multiple_Complex	97501180	97601748	NM_001166116; NM_003275; ENST00000259365; ENST00000375175; ENST00000395211; BC002660; OTTHUMT00000053320; OTTHUMT00000053321; CCDS6726.1; hsa_circ_0087664; uc004axk.3; uc004axl.3; uc064uqj.1	RefSeq; ENSEMBL; GenBank; Havana transcript; ccdsGene; circbase; UCSC Genes	NM_001166116; NM_003275; ENST00000259365; ENST00000375175; ENST00000395211; BC002660; OTTHUMT00000053320; OTTHUMT00000053321	GO:0006936; GO:0007015; GO:0008344; GO:0030049; GO:0030239; GO:0051694; GO:0070307	NM_001166116; NM_003275; ENST00000259365; ENST00000375175; ENST00000395211; BC002660; OTTHUMT00000053320; OTTHUMT00000053321	GO:0005829; GO:0005865; GO:0008180; GO:0016020; GO:0030863; GO:0005634; GO:0005737; GO:0005856; GO:0030016; GO:0030017	NM_001166116; NM_003275; ENST00000259365; ENST00000375175; ENST00000395211; BC002660; OTTHUMT00000053320; OTTHUMT00000053321	GO:0005523; GO:0051015; GO:0003779	NM_001166116; NM_003275; ENST00000259365; ENST00000375175; ENST00000395211; BC002660; OTTHUMT00000053320; OTTHUMT00000053321	GenMAPP	Striated_muscle_contraction	main	Multiple_Complex	Hs00984438_m1
TC0200010795.hg.1	13.04	14.6	-2.95	2.95	1	1	13.04	14.6	SLC11A1	solute carrier family 11 (proton-coupled divalent metal ion transporter), member 1	chr2	+	Multiple_Complex	218382029	218396894	NM_000578; ENST00000233202; ENST00000354352; ENST00000460592; ENST00000465984; ENST00000468221; ENST00000468721; ENST00000469449; ENST00000469799; ENST00000471875; ENST00000473367; ENST00000475225; ENST00000481524; ENST00000483487; ENST00000490536; ENST00000490872; ENST00000492413; ENST00000494322; ENST00000539932; BC071165; OTTHUMT00000195076; OTTHUMT00000195077; OTTHUMT00000195078; OTTHUMT00000…	RefSeq; ENSEMBL; GenBank; Havana transcript; UCSC Genes; ccdsGene; circbase; Ace View; lncRNAWiki; NONCODE					NM_000578; ENST00000233202; ENST00000354352; ENST00000460592; ENST00000465984; ENST00000468221; ENST00000468721; ENST00000469449; ENST00000469799; ENST00000471875; ENST00000473367; ENST00000475225; ENST00000481524; ENST00000483487; ENST00000490536; ENST00000490872; ENST00000492413; ENST00000494322; ENST00000539932; BC071165; OTTHUMT00000195076; OTTHUMT00000195077; OTTHUMT00000195078; OTTHUMT00000…	GO:0005384; GO:0042803; GO:0046915; GO:0051139; GO:0005215; GO:0003674				main	Multiple_Complex	Hs01105512_m1
TC0200011382.hg.1	8.69	7.13	2.95	2.95	1	1	8.69	7.13	SNED1	Memczak2013 ALT_DONOR, coding, INTERNAL, intronic best transcript NM_001080437	chr2	+	NonCoding	241052469	241052676	hsa_circ_0001120	circbase										main	NonCoding	TaqMan Probe Unavailable
TC0800006482.hg.1	6.02	4.46	2.95	2.95	1	1	6.02	4.46	ARHGEF10	Rho guanine nucleotide exchange factor 10	chr8	+	Multiple_Complex	1823976	1958641	NM_014629; ENST00000349830; ENST00000382795; ENST00000398560; ENST00000398564; ENST00000518288; ENST00000519641; ENST00000520359; ENST00000520972; ENST00000521927; ENST00000522435; ENST00000522969; ENST00000523596; ENST00000523711; ENST00000523980; ENST00000524212; BC112926; OTTHUMT00000374589; OTTHUMT00000374590; OTTHUMT00000374591; OTTHUMT00000374592; OTTHUMT00000374593; OTTHUMT00000374594; OTT…	RefSeq; ENSEMBL; GenBank; Havana transcript; Ace View; ccdsGene; circbase; UCSC Genes; lncRNAWiki; NONCODE	NM_014629; ENST00000349830; ENST00000382795; ENST00000398560; ENST00000398564; ENST00000518288; ENST00000519641; ENST00000520359; ENST00000520972; ENST00000521927; ENST00000522435; ENST00000522969; ENST00000523596; ENST00000523711; ENST00000523980; ENST00000524212; BC112926; OTTHUMT00000374589; OTTHUMT00000374590; OTTHUMT00000374591; OTTHUMT00000374592; OTTHUMT00000374593; OTTHUMT00000374594; OTT…	GO:0022011; GO:0035023; GO:0051298; GO:0051496; GO:0090307; GO:0090630; GO:0043547	NM_014629; ENST00000349830; ENST00000382795; ENST00000398560; ENST00000398564; ENST00000518288; ENST00000519641; ENST00000520359; ENST00000520972; ENST00000521927; ENST00000522435; ENST00000522969; ENST00000523596; ENST00000523711; ENST00000523980; ENST00000524212; BC112926; OTTHUMT00000374589; OTTHUMT00000374590; OTTHUMT00000374591; OTTHUMT00000374592; OTTHUMT00000374593; OTTHUMT00000374594; OTT…	GO:0005813; GO:0005829	NM_014629; ENST00000349830; ENST00000382795; ENST00000398560; ENST00000398564; ENST00000518288; ENST00000519641; ENST00000520359; ENST00000520972; ENST00000521927; ENST00000522435; ENST00000522969; ENST00000523596; ENST00000523711; ENST00000523980; ENST00000524212; BC112926; OTTHUMT00000374589; OTTHUMT00000374590; OTTHUMT00000374591; OTTHUMT00000374592; OTTHUMT00000374593; OTTHUMT00000374594; OTT…	GO:0005089; GO:0005515; GO:0019894; GO:0005085				main	Multiple_Complex	Hs01081047_m1
TC1100011182.hg.1	5.34	6.9	-2.95	2.95	1	1	5.34	6.9	PYGM	phosphorylase, glycogen, muscle	chr11	-	Multiple_Complex	64746389	64760715	NM_001164716; NM_005609; ENST00000164139; ENST00000377432; ENST00000460413; ENST00000462303; ENST00000483742; BC126392; BC130514; OTTHUMT00000143254; OTTHUMT00000143255; OTTHUMT00000143256; OTTHUMT00000143257; OTTHUMT00000143258; CCDS53659.1; CCDS8079.1; PYGM.bAug10; PYGM.fAug10; uc001oax.5; uc001oay.5; uc058czf.1; uc058czg.1; uc058czh.1; NONHSAT022015	RefSeq; ENSEMBL; GenBank; Havana transcript; ccdsGene; Ace View; UCSC Genes; lncRNAWiki; NONCODE	NM_001164716; NM_005609; ENST00000164139; ENST00000377432; ENST00000460413; ENST00000462303; ENST00000483742; BC126392; BC130514; OTTHUMT00000143254; OTTHUMT00000143255; OTTHUMT00000143256; OTTHUMT00000143257; OTTHUMT00000143258	GO:0001666; GO:0005975; GO:0005977; GO:0005980; GO:0006006; GO:0006874; GO:0044281; GO:0051591; GO:0008152; GO:0010033	NM_001164716; NM_005609; ENST00000164139; ENST00000377432; ENST00000460413; ENST00000462303; ENST00000483742; BC126392; BC130514; OTTHUMT00000143254; OTTHUMT00000143255; OTTHUMT00000143256; OTTHUMT00000143257; OTTHUMT00000143258	GO:0005737; GO:0005829; GO:0016529; GO:0070062	NM_001164716; NM_005609; ENST00000164139; ENST00000377432; ENST00000460413; ENST00000462303; ENST00000483742; BC126392; BC130514; OTTHUMT00000143254; OTTHUMT00000143255; OTTHUMT00000143256; OTTHUMT00000143257; OTTHUMT00000143258	GO:0005515; GO:0008144; GO:0008184; GO:0016208; GO:0030170; GO:0030246; GO:0000166; GO:0003824; GO:0004645; GO:0016740; GO:0016757	NM_001164716; NM_005609; ENST00000164139; ENST00000377432; ENST00000460413; ENST00000462303; ENST00000483742; BC126392; BC130514; OTTHUMT00000143254; OTTHUMT00000143255; OTTHUMT00000143256; OTTHUMT00000143257; OTTHUMT00000143258	GenMAPP; HumanCyc	Glycogen_Metabolism; PWY-5941; GLYCOCAT-PWY	main	Multiple_Complex	Hs00989940_gH
TC1200006721.hg.1	7.93	9.48	-2.94	2.94	1	1	7.93	9.48	CLEC4D	C-type lectin domain family 4, member D	chr12	+	Coding	8509475	8522366	NM_080387; ENST00000299665; ENST00000382064; BC032313; OTTHUMT00000400564; OTTHUMT00000400565; CCDS8593.1; uc001qun.4; uc058kwo.1	RefSeq; ENSEMBL; GenBank; Havana transcript; ccdsGene; UCSC Genes	NM_080387; ENST00000299665; ENST00000382064; BC032313; OTTHUMT00000400564; OTTHUMT00000400565	GO:0002223; GO:0002250; GO:0002292; GO:0038094; GO:0042742; GO:0045087; GO:0002376	NM_080387; ENST00000299665; ENST00000382064; BC032313; OTTHUMT00000400564; OTTHUMT00000400565	GO:0005886; GO:0016021; GO:0016020	NM_080387; ENST00000299665; ENST00000382064; BC032313; OTTHUMT00000400564; OTTHUMT00000400565	GO:0030246; GO:0034987				main	Coding	Hs00431022_m1
TC0300006793.hg.1	5.04	6.59	-2.93	2.93	1	1	5.04	6.59	KAT2B	Transcript Identified by AceView, Entrez Gene ID(s) 8850	chr3	+	Unassigned	20145541	20146078	KAT2B.jAug10-unspliced	Ace View										main	Unassigned	Hs05406237_s1
TC0400011220.hg.1	9.22	10.77	-2.93	2.93	1	1	9.22	10.77	WDFY3	WD repeat and FYVE domain containing 3	chr4	-	Multiple_Complex	84669540	84966391	NM_014991; ENST00000295888; ENST00000425179; ENST00000426414; ENST00000502713; ENST00000504839; ENST00000504990; ENST00000505923; ENST00000509172; ENST00000509825; ENST00000512267; ENST00000514071; ENST00000514711; OTTHUMT00000252811; OTTHUMT00000363029; OTTHUMT00000363030; OTTHUMT00000363031; OTTHUMT00000363032; OTTHUMT00000363033; OTTHUMT00000363034; OTTHUMT00000363035; OTTHUMT00000363036; OTTH…	RefSeq; ENSEMBL; Havana transcript; ccdsGene; circbase; UCSC Genes; Ace View; Guo; lncRNAWiki; NONCODE	NM_014991; ENST00000295888; ENST00000425179; ENST00000426414; ENST00000502713; ENST00000504839; ENST00000504990; ENST00000505923; ENST00000509172; ENST00000509825; ENST00000512267; ENST00000514071; ENST00000514711; OTTHUMT00000252811; OTTHUMT00000363029; OTTHUMT00000363030; OTTHUMT00000363031; OTTHUMT00000363032; OTTHUMT00000363033; OTTHUMT00000363034; OTTHUMT00000363035; OTTHUMT00000363036; OTTH…	GO:0008152; GO:0016197; GO:0016239; GO:0035973; GO:0006914			NM_014991; ENST00000295888; ENST00000425179; ENST00000426414; ENST00000502713; ENST00000504839; ENST00000504990; ENST00000505923; ENST00000509172; ENST00000509825; ENST00000512267; ENST00000514071; ENST00000514711; OTTHUMT00000252811; OTTHUMT00000363029; OTTHUMT00000363030; OTTHUMT00000363031; OTTHUMT00000363032; OTTHUMT00000363033; OTTHUMT00000363034; OTTHUMT00000363035; OTTHUMT00000363036; OTTH…	GO:0003831; GO:0005515; GO:0005545; GO:0046872; GO:0005488				main	Multiple_Complex	Hs01038176_m1
TC1200010839.hg.1	10.96	12.51	-2.93	2.93	1	1	10.96	12.51	ITGA5	integrin alpha 5	chr12	-	Multiple_Complex	54395261	54419460	NM_002205; ENST00000293379; ENST00000435631; ENST00000547197; ENST00000547744; ENST00000549601; ENST00000550141; ENST00000551564; ENST00000551861; ENST00000552387; ENST00000552431; ENST00000552564; ENST00000552583; ENST00000553071; BC008786; OTTHUMT00000406173; OTTHUMT00000406174; OTTHUMT00000406175; OTTHUMT00000406176; OTTHUMT00000406177; OTTHUMT00000406178; OTTHUMT00000406179; OTTHUMT0000040618…	RefSeq; ENSEMBL; GenBank; Havana transcript; ccdsGene; circbase; Ace View; UCSC Genes; lncRNAWiki; NONCODE					NM_002205; ENST00000293379; ENST00000435631; ENST00000547197; ENST00000547744; ENST00000549601; ENST00000550141; ENST00000551564; ENST00000551861; ENST00000552387; ENST00000552431; ENST00000552564; ENST00000552583; ENST00000553071; BC008786; OTTHUMT00000406173; OTTHUMT00000406174; OTTHUMT00000406175; OTTHUMT00000406176; OTTHUMT00000406177; OTTHUMT00000406178; OTTHUMT00000406179; OTTHUMT0000040618…	GO:0001618; GO:0005161; GO:0005178; GO:0005515; GO:0043184; GO:0046872; GO:0050839; GO:0005154	NM_002205; ENST00000293379; ENST00000435631; ENST00000547197; ENST00000547744; ENST00000549601; ENST00000550141; ENST00000551564; ENST00000551861; ENST00000552387; ENST00000552431; ENST00000552564; ENST00000552583; ENST00000553071; BC008786; OTTHUMT00000406173; OTTHUMT00000406174; OTTHUMT00000406175; OTTHUMT00000406176; OTTHUMT00000406177; OTTHUMT00000406178; OTTHUMT00000406179; OTTHUMT0000040618…	GenMAPP	Integrin-mediated_cell_adhesion_KEGG	main	Multiple_Complex	Hs01547681_m1
TC1900012001.hg.1	9.31	10.86	-2.93	2.93	1	1	9.31	10.86	FUZ	fuzzy planar cell polarity protein	chr19	-	Multiple_Complex	49806866	49813310	NM_001171937; NM_025129; NR_033269; ENST00000313777; ENST00000377092; ENST00000525130; ENST00000525370; ENST00000525800; ENST00000526435; ENST00000526575; ENST00000527111; ENST00000527585; ENST00000527973; ENST00000528043; ENST00000528094; ENST00000529634; ENST00000531017; ENST00000533418; ENST00000534008; ENST00000534138; BC004445; BC010092; BC016793; OTTHUMT00000393981; OTTHUMT00000393982; OTTH…	RefSeq; ENSEMBL; GenBank; Havana transcript; ccdsGene; Ace View; circbase; UCSC Genes; lncRNAWiki; NONCODE			NM_001171937; NM_025129; NR_033269; ENST00000313777; ENST00000377092; ENST00000525130; ENST00000525370; ENST00000525800; ENST00000526435; ENST00000526575; ENST00000527111; ENST00000527585; ENST00000527973; ENST00000528043; ENST00000528094; ENST00000529634; ENST00000531017; ENST00000533418; ENST00000534008; ENST00000534138; BC004445; BC010092; BC016793; OTTHUMT00000393981; OTTHUMT00000393982; OTTH…	GO:0005737; GO:0005856; GO:0070062						main	Multiple_Complex	Hs01547307_g1
TC0100016678.hg.1	13.29	14.83	-2.92	2.92	1	1	13.29	14.83	FAM129A	family with sequence similarity 129, member A	chr1	-	Multiple_Complex	184790724	184974586	NM_052966; ENST00000367511; ENST00000417056; ENST00000461167; ENST00000487074; ENST00000496299; BC030531; OTTHUMT00000085786; OTTHUMT00000098698; OTTHUMT00000098699; OTTHUMT00000098700; OTTHUMT00000098701; CCDS1364.1; hsa_circ_0008703; hsa_circ_0015657; hsa_circ_0015658; hsa_circ_0015659; hsa_circ_0015660; uc001gra.5; uc057nxf.1; uc057nxg.1; uc057nxi.1; uc057nxj.1; NONHSAT008402; NONHSAT008403	RefSeq; ENSEMBL; GenBank; Havana transcript; ccdsGene; circbase; UCSC Genes; lncRNAWiki; NONCODE	NM_052966; ENST00000367511; ENST00000417056; ENST00000461167; ENST00000487074; ENST00000496299; BC030531; OTTHUMT00000085786; OTTHUMT00000098698; OTTHUMT00000098699; OTTHUMT00000098700; OTTHUMT00000098701	GO:0001933; GO:0001934; GO:0034976; GO:0045727; GO:0006417	NM_052966; ENST00000367511; ENST00000417056; ENST00000461167; ENST00000487074; ENST00000496299; BC030531; OTTHUMT00000085786; OTTHUMT00000098698; OTTHUMT00000098699; OTTHUMT00000098700; OTTHUMT00000098701	GO:0005737; GO:0005886; GO:0016020; GO:0070062	NM_052966; ENST00000367511; ENST00000417056; ENST00000461167; ENST00000487074; ENST00000496299; BC030531; OTTHUMT00000085786; OTTHUMT00000098698; OTTHUMT00000098699; OTTHUMT00000098700; OTTHUMT00000098701	GO:0005515; GO:0003674				main	Multiple_Complex	Hs00898463_m1
TC0400011175.hg.1	5.46	3.92	2.92	2.92	1	1	5.46	3.92	TMEM150C	transmembrane protein 150C	chr4	-	Multiple_Complex	82483170	82562357	NM_001080506; ENST00000449862; ENST00000454948; ENST00000508701; ENST00000515780; BC147019; BC147027; OTTHUMT00000363685; OTTHUMT00000363687; OTTHUMT00000363688; OTTHUMT00000363689; CCDS47087.1; TMEM150CandRPS6P6.eAug10; uc003hmy.2; uc011ccj.2; uc062xtb.1; uc062xtc.1; ENST00000471756; ENST00000488045; NONHSAT147291; OTTHUMT00000349013; OTTHUMT00000349014	RefSeq; ENSEMBL; GenBank; Havana transcript; ccdsGene; Ace View; UCSC Genes; lncRNAWiki; NONCODE	NM_001080506; ENST00000449862; ENST00000454948; ENST00000508701; ENST00000515780; BC147019; BC147027; OTTHUMT00000363685; OTTHUMT00000363687; OTTHUMT00000363688; OTTHUMT00000363689	GO:0010506	NM_001080506; ENST00000449862; ENST00000454948; ENST00000508701; ENST00000515780; BC147019; BC147027; OTTHUMT00000363685; OTTHUMT00000363687; OTTHUMT00000363688; OTTHUMT00000363689	GO:0005764; GO:0016021; GO:0016020						main	Multiple_Complex	Hs00944989_m1
TC1500008984.hg.1	13.63	15.18	-2.92	2.92	1	1	13.63	15.18	NOP10	NOP10 ribonucleoprotein	chr15	-	Multiple_Complex	34341713	34343177	NM_018648; ENST00000328848; ENST00000557912; BC008886; BC063023; OTTHUMT00000251602; OTTHUMT00000418023; CCDS10037.1; hsa_circ_0034350; hsa_circ_0034351; NOP10.aAug10; uc001zie.2; uc059hhp.1	RefSeq; ENSEMBL; GenBank; Havana transcript; ccdsGene; circbase; Ace View; UCSC Genes	NM_018648; ENST00000328848; ENST00000557912; BC008886; BC063023; OTTHUMT00000251602; OTTHUMT00000418023	GO:0001522; GO:0006364; GO:0007004; GO:0042254	NM_018648; ENST00000328848; ENST00000557912; BC008886; BC063023; OTTHUMT00000251602; OTTHUMT00000418023	GO:0005634; GO:0005697; GO:0005732; GO:0031429; GO:0072589; GO:0090661; GO:0005730; GO:0015030; GO:0030529; GO:0072588	NM_018648; ENST00000328848; ENST00000557912; BC008886; BC063023; OTTHUMT00000251602; OTTHUMT00000418023	GO:0005515; GO:0030515; GO:0070034				main	Multiple_Complex	Hs01094813_g1
TC0400012019.hg.1	8.27	9.81	-2.91	2.91	1	1	8.27	9.81	GYPA	glycophorin A (MNS blood group)	chr4	-	Multiple_Complex	144109303	144140786	NM_001308187; NM_001308190; NM_002099; ENST00000324022; ENST00000360771; ENST00000503627; ENST00000504786; ENST00000508337; ENST00000509346; ENST00000510771; ENST00000512064; ENST00000512789; ENST00000514603; ENST00000535709; ENST00000616983; BC005319; BC013328; OTTHUMT00000364783; OTTHUMT00000364784; OTTHUMT00000364785; OTTHUMT00000364786; OTTHUMT00000364787; OTTHUMT00000364788; OTTHUMT000003647…	RefSeq; ENSEMBL; GenBank; Havana transcript; ccdsGene; Ace View; circbase; UCSC Genes; lncRNAWiki; NONCODE	NM_001308187; NM_001308190; NM_002099; ENST00000324022; ENST00000360771; ENST00000503627; ENST00000504786; ENST00000508337; ENST00000509346; ENST00000510771; ENST00000512064; ENST00000512789; ENST00000514603; ENST00000535709; ENST00000616983; BC005319; BC013328; OTTHUMT00000364783; OTTHUMT00000364784; OTTHUMT00000364785; OTTHUMT00000364786; OTTHUMT00000364787; OTTHUMT00000364788; OTTHUMT000003647…	GO:0046718; GO:0016032; GO:0008150; GO:0007016; GO:0047484	NM_001308187; NM_001308190; NM_002099; ENST00000324022; ENST00000360771; ENST00000503627; ENST00000504786; ENST00000508337; ENST00000509346; ENST00000510771; ENST00000512064; ENST00000512789; ENST00000514603; ENST00000535709; ENST00000616983; BC005319; BC013328; OTTHUMT00000364783; OTTHUMT00000364784; OTTHUMT00000364785; OTTHUMT00000364786; OTTHUMT00000364787; OTTHUMT00000364788; OTTHUMT000003647…	GO:0005886; GO:0016020; GO:0016021; GO:0070062; GO:0005575; GO:0005887; GO:0009897	NM_001308187; NM_001308190; NM_002099; ENST00000324022; ENST00000360771; ENST00000503627; ENST00000504786; ENST00000508337; ENST00000509346; ENST00000510771; ENST00000512064; ENST00000512789; ENST00000514603; ENST00000535709; ENST00000616983; BC005319; BC013328; OTTHUMT00000364783; OTTHUMT00000364784; OTTHUMT00000364785; OTTHUMT00000364786; OTTHUMT00000364787; OTTHUMT00000364788; OTTHUMT000003647…	GO:0001618; GO:0042802; GO:0003674; GO:0005515; GO:0042803				main	Multiple_Complex	Hs01068072_m1
TC0700013538.hg.1	14.02	12.48	2.91	2.91	1	1	14.02	12.48	TRGJ1; TRGC2; TRGJ2; TRGV9; TRGC1; TRGJP; TRGJP2	T cell receptor gamma joining 1; T cell receptor gamma constant 2; T cell receptor gamma joining 2; T cell receptor gamma variable 9; T cell receptor gamma constant 1; T cell receptor gamma joining P; T cell receptor gamma joining P2	chr7	-	Multiple_Complex	38239580	38318861	OTTHUMT00000338820; OTTHUMT00000338821; OTTHUMT00000338823; OTTHUMT00000338824; OTTHUMT00000338825; OTTHUMT00000338826; OTTHUMT00000338828; NM_001003799; NM_001003806; ENST00000443402; ENST00000610889; ENST00000619762; BC105589; hsa_circ_0001697; uc064cxi.1; uc064cxl.1; uc064cxm.1; uc064cxn.1; uc064cxo.1; uc064cxq.1; uc064cxr.1; uc064cxs.1; uc064cxv.1; ENST00000390333; ENST00000390334; ENST000003…	Havana transcript; RefSeq; ENSEMBL; GenBank; circbase; UCSC Genes; lncRNAWiki; NONCODE	OTTHUMT00000338821; NM_001003799; NM_001003806; ENST00000443402; ENST00000610889; ENST00000619762; BC105589	GO:0006955; GO:0007165	OTTHUMT00000338821; OTTHUMT00000338824; OTTHUMT00000338825; NM_001003799; NM_001003806; ENST00000443402; ENST00000610889; ENST00000619762; BC105589; ENST00000436911; ENST00000444775	GO:0005887; GO:0016021; GO:0016020; GO:0005886	OTTHUMT00000338821; OTTHUMT00000338824; NM_001003799; NM_001003806; ENST00000443402; ENST00000610889; ENST00000619762; BC105589; ENST00000444775	GO:0004888; GO:0042605; GO:0042287				main	Multiple_Complex	Hs00233330_m1
TC1100012574.hg.1	9.23	10.77	-2.91	2.91	1	1	9.23	10.77	SORL1	Memczak2013 ANTISENSE, CDS, coding, INTERNAL best transcript NM_003105	chr11	-	NonCoding	121583471	121583578	hsa_circ_0000366	circbase										main	NonCoding	TaqMan Probe Unavailable
TC1200012745.hg.1	9.74	11.28	-2.91	2.91	1	1	9.74	11.28	C1RL	complement component 1, r subcomponent-like	chr12	-	Multiple_Complex	7093707	7109278	NM_001297640; NM_001297642; NM_001297643; NM_016546; ENST00000266542; ENST00000504702; ENST00000534950; ENST00000534969; ENST00000537833; ENST00000539927; ENST00000543933; ENST00000543941; ENST00000544702; ENST00000545280; ENST00000545337; OTTHUMT00000398366; OTTHUMT00000398367; OTTHUMT00000398368; OTTHUMT00000398370; OTTHUMT00000398371; OTTHUMT00000398372; OTTHUMT00000398373; OTTHUMT00000398374;…	RefSeq; ENSEMBL; Havana transcript; GenBank; Ace View; ccdsGene; circbase; UCSC Genes; lncRNAWiki; NONCODE	NM_001297640; NM_001297642; NM_001297643; NM_016546; ENST00000266542; ENST00000504702; ENST00000534950; ENST00000534969; ENST00000537833; ENST00000539927; ENST00000543933; ENST00000543941; ENST00000544702; ENST00000545280; ENST00000545337; OTTHUMT00000398366; OTTHUMT00000398367; OTTHUMT00000398368; OTTHUMT00000398370; OTTHUMT00000398371; OTTHUMT00000398372; OTTHUMT00000398373; OTTHUMT00000398374;…	GO:0006508; GO:0006955; GO:0006958; GO:0045087; GO:0002376	NM_001297640; NM_001297642; NM_001297643; NM_016546; ENST00000266542; ENST00000504702; ENST00000534950; ENST00000534969; ENST00000537833; ENST00000539927; ENST00000543933; ENST00000543941; ENST00000544702; ENST00000545280; ENST00000545337; OTTHUMT00000398366; OTTHUMT00000398367; OTTHUMT00000398368; OTTHUMT00000398370; OTTHUMT00000398371; OTTHUMT00000398372; OTTHUMT00000398373; OTTHUMT00000398374;…	GO:0005615; GO:0070062; GO:0005576	NM_001297640; NM_001297642; NM_001297643; NM_016546; ENST00000266542; ENST00000504702; ENST00000534950; ENST00000534969; ENST00000537833; ENST00000539927; ENST00000543933; ENST00000543941; ENST00000544702; ENST00000545280; ENST00000545337; OTTHUMT00000398366; OTTHUMT00000398367; OTTHUMT00000398368; OTTHUMT00000398370; OTTHUMT00000398371; OTTHUMT00000398372; OTTHUMT00000398373; OTTHUMT00000398374;…	GO:0004252; GO:0008233; GO:0008236; GO:0016787				main	Multiple_Complex	Hs01014038_m1
TC1600007875.hg.1	4.03	5.57	-2.91	2.91	1	1	4.03	5.57	CHD9	Transcript Identified by AceView, Entrez Gene ID(s) 80205	chr16	+	Unassigned	53056823	53057350	CHD9.vhAug10-unspliced	Ace View										main	Unassigned	TaqMan Probe Unavailable
TC2100006655.hg.1	4.79	3.25	2.91	2.91	1	1	4.79	3.25	LINC01549	long intergenic non-protein coding RNA 1549	chr21	+	Multiple_Complex	17438890	17449185	NR_037585; NR_037586; ENST00000440664; ENST00000613691; BC144391; OTTHUMT00000158061; uc061zdx.1; uc061zdy.1; LN608865.1:1..714:ncRNA; NONHSAT081273; NONHSAT081274; NONHSAT081275	RefSeq; ENSEMBL; GenBank; Havana transcript; UCSC Genes; RNACentral; lncRNAWiki; NONCODE										main	Multiple_Complex	Hs04232228_m1
TC0200015202.hg.1	7.77	6.24	2.9	2.9	1	1	7.77	6.24	DIRC1	disrupted in renal carcinoma 1	chr2	-	Coding	188733738	188790104	NM_052952; ENST00000308100; BC125137; OTTHUMT00000255897; CCDS2296.1; DIRC1.aAug10; uc002uqi.2	RefSeq; ENSEMBL; GenBank; Havana transcript; ccdsGene; Ace View; UCSC Genes										main	Coding	Hs04967405_s1
TC0400012902.hg.1	9.01	10.54	-2.9	2.9	1	1	9.01	10.54	FGFBP2	fibroblast growth factor binding protein 2	chr4	-	Coding	15960240	15963236	NM_031950; ENST00000259989; BC025720; OTTHUMT00000250324; CCDS3419.1; FGFBP2.aAug10; uc003gon.4	RefSeq; ENSEMBL; GenBank; Havana transcript; ccdsGene; Ace View; UCSC Genes			NM_031950; ENST00000259989; BC025720; OTTHUMT00000250324	GO:0005615; GO:0005576	NM_031950; ENST00000259989; BC025720; OTTHUMT00000250324	GO:0019838				main	Coding	Hs04975886_s1
TC1600009165.hg.1	6.42	7.96	-2.9	2.9	1	1	6.42	7.96	MMP25-AS1	MMP25 antisense RNA 1	chr16	-	NonCoding	3051096	3075589	NR_123723; ENST00000570949.1; ENST00000572222.1; ENST00000572427.1; ENST00000572574.1; ENST00000572930.1; ENST00000573130.1; ENST00000573878.1; ENST00000573953.1; ENST00000576250.1; ENST00000597579.1; hsa_circ_0037595; LOC100132433.jAug10; LOC100132433.lAug10; OTTHUMT00000437107; OTTHUMT00000437108; OTTHUMT00000437109; OTTHUMT00000437110; OTTHUMT00000437111; OTTHUMT00000437112; OTTHUMT00000437113…	RefSeq; lncRNAWiki; circbase; Ace View; Havana transcript; UCSC Genes; ENSEMBL; RNACentral; NONCODE										main	NonCoding	Hs01392712_m1
TC1900006730.hg.1	7.45	8.99	-2.9	2.9	1	1	7.45	8.99	KDM4B	lysine (K)-specific demethylase 4B	chr19	+	Multiple_Complex	4969113	5153597	NM_015015; ENST00000159111; ENST00000381759; ENST00000536461; ENST00000588166; ENST00000588337; ENST00000588361; ENST00000588961; ENST00000589104; ENST00000592159; ENST00000592175; ENST00000611640; ENST00000624683; BC136611; BC144292; OTTHUMT00000450557; OTTHUMT00000450558; OTTHUMT00000450559; OTTHUMT00000450560; OTTHUMT00000450561; OTTHUMT00000450562; OTTHUMT00000450563; OTTHUMT00000450564; OTTH…	RefSeq; ENSEMBL; GenBank; Havana transcript; ccdsGene; circbase; Ace View; UCSC Genes; Guo; lncRNAWiki; NONCODE	NM_015015; ENST00000159111; ENST00000381759; ENST00000536461; ENST00000588166; ENST00000588337; ENST00000588361; ENST00000588961; ENST00000589104; ENST00000592159; ENST00000592175; ENST00000611640; ENST00000624683; BC136611; BC144292; OTTHUMT00000450557; OTTHUMT00000450558; OTTHUMT00000450559; OTTHUMT00000450560; OTTHUMT00000450561; OTTHUMT00000450562; OTTHUMT00000450563; OTTHUMT00000450564; OTTH…	GO:0006281; GO:0006302; GO:0006325; GO:0006351; GO:0006355; GO:0016568; GO:0055114; GO:0016577	NM_015015; ENST00000159111; ENST00000381759; ENST00000536461; ENST00000588166; ENST00000588337; ENST00000588361; ENST00000588961; ENST00000589104; ENST00000592159; ENST00000592175; ENST00000611640; ENST00000624683; BC136611; BC144292; OTTHUMT00000450557; OTTHUMT00000450558; OTTHUMT00000450559; OTTHUMT00000450560; OTTHUMT00000450561; OTTHUMT00000450562; OTTHUMT00000450563; OTTHUMT00000450564; OTTH…	GO:0005634; GO:0005654; GO:0005737; GO:0005925; GO:0030054	NM_015015; ENST00000159111; ENST00000381759; ENST00000536461; ENST00000588166; ENST00000588337; ENST00000588361; ENST00000588961; ENST00000589104; ENST00000592159; ENST00000592175; ENST00000611640; ENST00000624683; BC136611; BC144292; OTTHUMT00000450557; OTTHUMT00000450558; OTTHUMT00000450559; OTTHUMT00000450560; OTTHUMT00000450561; OTTHUMT00000450562; OTTHUMT00000450563; OTTHUMT00000450564; OTTH…	GO:0008270; GO:0051213; GO:0016491; GO:0046872; GO:0032452; GO:0005515				main	Multiple_Complex	Hs00392122_m1
TC0200013351.hg.1	8.99	7.46	2.89	2.89	1	1	8.99	7.46	RGPD1; RGPD2	RANBP2-like and GRIP domain containing 1; RANBP2-like and GRIP domain containing 2	chr2	-	Multiple_Complex	87755955	87992861	NM_001024457; ENST00000398146; ENST00000494592; OTTHUMT00000330534; OTTHUMT00000330782; NM_001078170_2; BC172352_2; CCDS42710.2; uc010fhc.3; uc061lou.1; ENST00000617314; hsa_circ_0006166; NONHSAT072165; OTTHUMT00000475350; TCONS_l2_00014674	RefSeq; ENSEMBL; Havana transcript; GenBank; ccdsGene; UCSC Genes; circbase; lncRNAWiki; NONCODE; lncRNA Db	NM_001024457; ENST00000398146; ENST00000494592; OTTHUMT00000330534; OTTHUMT00000330782	GO:0000042; GO:0046907	NM_001024457; ENST00000398146; ENST00000494592; OTTHUMT00000330534; OTTHUMT00000330782	GO:0005622	ENST00000398146	GO:0005515				main	Multiple_Complex	Hs00196669_m1
TC0100007333.hg.1	14.44	12.91	2.88	2.88	1	1	14.44	12.91	PITHD1	PITH (C-terminal proteasome-interacting domain of thioredoxin-like) domain containing 1	chr1	+	Multiple_Complex	23778386	23788232	NM_020362; ENST00000246151; ENST00000374524; ENST00000415372; BC017208; OTTHUMT00000008243; OTTHUMT00000008244; OTTHUMT00000096559; CCDS240.1; hsa_circ_0010889; hsa_circ_0010890; hsa_circ_0010891; uc001bhq.4; uc057dgp.1; uc057dgq.1	RefSeq; ENSEMBL; GenBank; Havana transcript; ccdsGene; circbase; UCSC Genes			NM_020362; ENST00000246151; ENST00000374524; ENST00000415372; BC017208; OTTHUMT00000008243; OTTHUMT00000008244; OTTHUMT00000096559	GO:0005634						main	Multiple_Complex	Hs00220527_m1
TC0200012161.hg.1	5.18	6.71	-2.88	2.88	1	1	5.18	6.71	GALNT14	polypeptide N-acetylgalactosaminyltransferase 14	chr2	-	Multiple_Complex	30910465	31155202	NM_001253826; NM_001253827; NM_024572; NR_045602; ENST00000324589; ENST00000349752; ENST00000406653; ENST00000424136; ENST00000430167; ENST00000455477; ENST00000461193; ENST00000464038; ENST00000475320; ENST00000481023; ENST00000485468; ENST00000486564; ENST00000490212; ENST00000496397; ENST00000498206; BC010659; OTTHUMT00000157264; OTTHUMT00000157265; OTTHUMT00000157266; OTTHUMT00000157267; OTTH…	RefSeq; ENSEMBL; GenBank; Havana transcript; ccdsGene; Ace View; circbase; UCSC Genes; lncRNAWiki; NONCODE	NM_001253826; NM_001253827; NM_024572; NR_045602; ENST00000324589; ENST00000349752; ENST00000406653; ENST00000424136; ENST00000430167; ENST00000455477; ENST00000461193; ENST00000464038; ENST00000475320; ENST00000481023; ENST00000485468; ENST00000486564; ENST00000490212; ENST00000496397; ENST00000498206; BC010659; OTTHUMT00000157264; OTTHUMT00000157265; OTTHUMT00000157266; OTTHUMT00000157267; OTTH…	GO:0006493; GO:0016266; GO:0043687; GO:0044267; GO:0006486; GO:0008152	NM_001253826; NM_001253827; NM_024572; NR_045602; ENST00000324589; ENST00000349752; ENST00000406653; ENST00000424136; ENST00000430167; ENST00000455477; ENST00000461193; ENST00000464038; ENST00000475320; ENST00000481023; ENST00000485468; ENST00000486564; ENST00000490212; ENST00000496397; ENST00000498206; BC010659; OTTHUMT00000157264; OTTHUMT00000157265; OTTHUMT00000157266; OTTHUMT00000157267; OTTH…	GO:0000139; GO:0016021; GO:0005794; GO:0016020	NM_001253826; NM_001253827; NM_024572; NR_045602; ENST00000324589; ENST00000349752; ENST00000406653; ENST00000424136; ENST00000430167; ENST00000455477; ENST00000461193; ENST00000464038; ENST00000475320; ENST00000481023; ENST00000485468; ENST00000486564; ENST00000490212; ENST00000496397; ENST00000498206; BC010659; OTTHUMT00000157264; OTTHUMT00000157265; OTTHUMT00000157266; OTTHUMT00000157267; OTTH…	GO:0004653; GO:0030246; GO:0046872; GO:0016740; GO:0016757				main	Multiple_Complex	Hs00226180_m1
TC1000006796.hg.1	7.07	8.6	-2.88	2.88	1	1	7.07	8.6	SEC61A2	Sec61 translocon alpha 2 subunit	chr10	+	Multiple_Complex	12129637	12169961	NM_001142627; NM_001142628; NM_018144; NR_024576; NR_024577; ENST00000298428; ENST00000304267; ENST00000379017; ENST00000379020; ENST00000379033; ENST00000379051; ENST00000418772; ENST00000419021; ENST00000441368; ENST00000457034; ENST00000466451; ENST00000472221; ENST00000475268; ENST00000495368; BC026179; OTTHUMT00000046787; OTTHUMT00000046788; OTTHUMT00000046789; OTTHUMT00000046790; OTTHUMT000…	RefSeq; ENSEMBL; GenBank; Havana transcript; UCSC Genes; ccdsGene; Ace View; circbase; Guo; lncRNAWiki; NONCODE			NM_001142627; NM_001142628; NM_018144; NR_024576; NR_024577; ENST00000298428; ENST00000304267; ENST00000379017; ENST00000379020; ENST00000379033; ENST00000379051; ENST00000418772; ENST00000419021; ENST00000441368; ENST00000457034; ENST00000466451; ENST00000472221; ENST00000475268; ENST00000495368; BC026179; OTTHUMT00000046787; OTTHUMT00000046788; OTTHUMT00000046789; OTTHUMT00000046790; OTTHUMT000…	GO:0005789; GO:0005829; GO:0016021; GO:0005783; GO:0016020	NM_001142627; NM_001142628; NM_018144; NR_024576; NR_024577; ENST00000298428; ENST00000304267; ENST00000379017; ENST00000379020; ENST00000379033; ENST00000379051; ENST00000418772; ENST00000419021; ENST00000441368; ENST00000457034; ENST00000466451; ENST00000472221; ENST00000475268; ENST00000495368; BC026179; OTTHUMT00000046787; OTTHUMT00000046788; OTTHUMT00000046789; OTTHUMT00000046790; OTTHUMT000…	GO:0043022; GO:0003674				main	Multiple_Complex	Hs00943750_m1
TC1400008056.hg.1	7.74	6.21	2.88	2.88	1	1	7.74	6.21	IFI27	interferon, alpha-inducible protein 27	chr14	+	Multiple_Complex	94104836	94116699	NM_001288952; NM_001288954; NM_001288956; NM_001288957; NM_001288958; NM_001288959; NM_001288960; NM_001288995; NM_005532; ENST00000555081; ENST00000555819; ENST00000557700; ENST00000611954; ENST00000612499; ENST00000612813; ENST00000614204; ENST00000614288; ENST00000614648; ENST00000616764; ENST00000618200; ENST00000618863; ENST00000620066; ENST00000620396; ENST00000621160; BC015492; OTTHUMT0000…	RefSeq; ENSEMBL; GenBank; Havana transcript; ccdsGene; circbase; UCSC Genes; lncRNAWiki; NONCODE	NM_001288952; NM_001288954; NM_001288956; NM_001288957; NM_001288958; NM_001288959; NM_001288960; NM_001288995; NM_005532; ENST00000555081; ENST00000555819; ENST00000557700; ENST00000611954; ENST00000612499; ENST00000612813; ENST00000614204; ENST00000614288; ENST00000614648; ENST00000616764; ENST00000618200; ENST00000618863; ENST00000620066; ENST00000620396; ENST00000621160; BC015492; OTTHUMT0000…	GO:0000122; GO:0006919; GO:0019221; GO:0046825; GO:0060337; GO:0097190; GO:0006915	NM_001288952; NM_001288954; NM_001288956; NM_001288957; NM_001288958; NM_001288959; NM_001288960; NM_001288995; NM_005532; ENST00000555081; ENST00000555819; ENST00000557700; ENST00000611954; ENST00000612499; ENST00000612813; ENST00000614204; ENST00000614288; ENST00000614648; ENST00000616764; ENST00000618200; ENST00000618863; ENST00000620066; ENST00000620396; ENST00000621160; BC015492; OTTHUMT0000…	GO:0005637; GO:0005739; GO:0005741; GO:0016021; GO:0016020	NM_001288952; NM_001288954; NM_001288956; NM_001288957; NM_001288958; NM_001288959; NM_001288960; NM_001288995; NM_005532; ENST00000555081; ENST00000555819; ENST00000557700; ENST00000611954; ENST00000612499; ENST00000612813; ENST00000614204; ENST00000614288; ENST00000614648; ENST00000616764; ENST00000618200; ENST00000618863; ENST00000620066; ENST00000620396; ENST00000621160; BC015492; OTTHUMT0000…	GO:0001102; GO:0005521; GO:0003674				main	Multiple_Complex	Hs05035882_s1
TC0300011757.hg.1	3.75	5.27	-2.87	2.87	1	1	3.75	5.27	PROS1	protein S (alpha)	chr3	-	Multiple_Complex	93873033	93974090	NM_000313; ENST00000348974; ENST00000394236; ENST00000407433; ENST00000472684; ENST00000488658; BC015801; OTTHUMT00000317762; OTTHUMT00000317763; OTTHUMT00000317764; OTTHUMT00000352896; OTTHUMT00000352897; CCDS2923.1; PROS1.bAug10; uc003dqz.5; uc003drb.5; uc062lsx.1; uc062lsy.1; uc062lsz.1; NONHSAT090718	RefSeq; ENSEMBL; GenBank; Havana transcript; ccdsGene; Ace View; UCSC Genes; lncRNAWiki; NONCODE	NM_000313; ENST00000348974; ENST00000394236; ENST00000407433; ENST00000472684; ENST00000488658; BC015801; OTTHUMT00000317762; OTTHUMT00000317763; OTTHUMT00000317764; OTTHUMT00000352896; OTTHUMT00000352897	GO:0002576; GO:0006508; GO:0007596; GO:0010951; GO:0017187; GO:0030168; GO:0030449; GO:0032496; GO:0042730; GO:0043687; GO:0044267; GO:0045087; GO:0050766; GO:0050900; GO:0007599; GO:0050819	NM_000313; ENST00000348974; ENST00000394236; ENST00000407433; ENST00000472684; ENST00000488658; BC015801; OTTHUMT00000317762; OTTHUMT00000317763; OTTHUMT00000317764; OTTHUMT00000352896; OTTHUMT00000352897	GO:0000139; GO:0005576; GO:0005615; GO:0005789; GO:0005796; GO:0005886; GO:0031093; GO:0043234; GO:0070062; GO:0072562; GO:0016020; GO:0016021	NM_000313; ENST00000348974; ENST00000394236; ENST00000407433; ENST00000472684; ENST00000488658; BC015801; OTTHUMT00000317762; OTTHUMT00000317763; OTTHUMT00000317764; OTTHUMT00000352896; OTTHUMT00000352897	GO:0004866; GO:0005509; GO:0032403; GO:0005515				main	Multiple_Complex	Hs01015112_m1
TC0700012111.hg.1	4.67	6.19	-2.87	2.87	1	1	4.67	6.19	FBXL13	F-box and leucine-rich repeat protein 13	chr7	-	Multiple_Complex	102812861	103074843	NM_001111038; NM_001287150; NM_145032; NR_105043; ENST00000313221; ENST00000379305; ENST00000379308; ENST00000436908; ENST00000440067; ENST00000448002; ENST00000455112; ENST00000456695; ENST00000468216; ENST00000471074; ENST00000477915; ENST00000480422; BC026121; BC031285; OTTHUMT00000348001; OTTHUMT00000348002; OTTHUMT00000348003; OTTHUMT00000348005; OTTHUMT00000348006; OTTHUMT00000348007; OTTHU…	RefSeq; ENSEMBL; GenBank; Havana transcript; ccdsGene; Ace View; circbase; UCSC Genes; Guo; lncRNAWiki; NONCODE	NM_001111038; NM_001287150; NM_145032; NR_105043; ENST00000313221; ENST00000379305; ENST00000379308; ENST00000436908; ENST00000440067; ENST00000448002; ENST00000455112; ENST00000456695; ENST00000468216; ENST00000471074; ENST00000477915; ENST00000480422; BC026121; BC031285; OTTHUMT00000348001; OTTHUMT00000348002; OTTHUMT00000348003; OTTHUMT00000348005; OTTHUMT00000348006; OTTHUMT00000348007; OTTHU…	GO:0016567; GO:0031146	NM_001111038; NM_001287150; NM_145032; NR_105043; ENST00000313221; ENST00000379305; ENST00000379308; ENST00000436908; ENST00000440067; ENST00000448002; ENST00000455112; ENST00000456695; ENST00000468216; ENST00000471074; ENST00000477915; ENST00000480422; BC026121; BC031285; OTTHUMT00000348001; OTTHUMT00000348002; OTTHUMT00000348003; OTTHUMT00000348005; OTTHUMT00000348006; OTTHUMT00000348007; OTTHU…	GO:0005737; GO:0019005	NM_001111038; NM_001287150; NM_145032; NR_105043; ENST00000313221; ENST00000379305; ENST00000379308; ENST00000436908; ENST00000440067; ENST00000448002; ENST00000455112; ENST00000456695; ENST00000468216; ENST00000471074; ENST00000477915; ENST00000480422; BC026121; BC031285; OTTHUMT00000348001; OTTHUMT00000348002; OTTHUMT00000348003; OTTHUMT00000348005; OTTHUMT00000348006; OTTHUMT00000348007; OTTHU…	GO:0061630; GO:0005515				main	Multiple_Complex	Hs01043363_m1
TC0800012284.hg.1	7.33	8.86	-2.87	2.87	1	1	7.33	8.86	EXTL3	exostosin-like glycosyltransferase 3	chr8	+	Multiple_Complex	28701327	28755599	NM_001440; NR_073468; NR_073469; ENST00000220562; ENST00000517738; ENST00000518223; ENST00000519886; ENST00000520679; ENST00000521473; ENST00000521532; ENST00000522698; ENST00000523271; BC006363; OTTHUMT00000219987; OTTHUMT00000376833; OTTHUMT00000376834; OTTHUMT00000376835; OTTHUMT00000376836; OTTHUMT00000376837; OTTHUMT00000376838; OTTHUMT00000376839; OTTHUMT00000376840; CCDS6070.1; EXTL3.bAug1…	RefSeq; ENSEMBL; GenBank; Havana transcript; ccdsGene; Ace View; circbase; UCSC Genes; lncRNAWiki; NONCODE	NM_001440; NR_073468; NR_073469; ENST00000220562; ENST00000517738; ENST00000518223; ENST00000519886; ENST00000520679; ENST00000521473; ENST00000521532; ENST00000522698; ENST00000523271; BC006363; OTTHUMT00000219987; OTTHUMT00000376833; OTTHUMT00000376834; OTTHUMT00000376835; OTTHUMT00000376836; OTTHUMT00000376837; OTTHUMT00000376838; OTTHUMT00000376839; OTTHUMT00000376840	GO:0006024; GO:0015012; GO:0030307; GO:0030968; GO:0036498; GO:0044267	NM_001440; NR_073468; NR_073469; ENST00000220562; ENST00000517738; ENST00000518223; ENST00000519886; ENST00000520679; ENST00000521473; ENST00000521532; ENST00000522698; ENST00000523271; BC006363; OTTHUMT00000219987; OTTHUMT00000376833; OTTHUMT00000376834; OTTHUMT00000376835; OTTHUMT00000376836; OTTHUMT00000376837; OTTHUMT00000376838; OTTHUMT00000376839; OTTHUMT00000376840	GO:0005783; GO:0005789; GO:0016021; GO:0016020	NM_001440; NR_073468; NR_073469; ENST00000220562; ENST00000517738; ENST00000518223; ENST00000519886; ENST00000520679; ENST00000521473; ENST00000521532; ENST00000522698; ENST00000523271; BC006363; OTTHUMT00000219987; OTTHUMT00000376833; OTTHUMT00000376834; OTTHUMT00000376835; OTTHUMT00000376836; OTTHUMT00000376837; OTTHUMT00000376838; OTTHUMT00000376839; OTTHUMT00000376840	GO:0001888; GO:0004872; GO:0046872; GO:0008375; GO:0016740; GO:0016757	NM_001440; BC006363	MetaCyc	PWY-6558	main	Multiple_Complex	Hs00918599_m1
TC0200015714.hg.1	14.47	15.99	-2.86	2.86	1	1	14.47	15.99	CXCR1	chemokine (C-X-C motif) receptor 1	chr2	-	Multiple_Complex	218162845	218166995	NM_000634; ENST00000295683; BC028221; BC072397; OTTHUMT00000256773; CCDS2409.1; uc002vhc.4; NONHSAT076892	RefSeq; ENSEMBL; GenBank; Havana transcript; ccdsGene; UCSC Genes; NONCODE	NM_000634; ENST00000295683; BC028221; BC072397; OTTHUMT00000256773	GO:0002407; GO:0006935; GO:0006954; GO:0007166; GO:0007186; GO:0031623; GO:0038112; GO:0070098; GO:0007165	NM_000634; ENST00000295683; BC028221; BC072397; OTTHUMT00000256773	GO:0005886; GO:0016020; GO:0016021	NM_000634; ENST00000295683; BC028221; BC072397; OTTHUMT00000256773	GO:0004918; GO:0004930; GO:0004950; GO:0019959; GO:0004871; GO:0016494	NM_000634; ENST00000295683; BC028221; BC072397; OTTHUMT00000256773	GenMAPP	GPCRDB_Class_A_Rhodopsin-like; GPCRDB_Other; Peptide_GPCRs	main	Multiple_Complex	Hs04965770_m1
TC0600011535.hg.1	11.52	13.04	-2.86	2.86	1	1	11.52	13.04	RGL2	ral guanine nucleotide dissociation stimulator-like 2	chr6	-	Multiple_Complex	33291654	33299388	ENST00000425946; ENST00000437840; ENST00000460988; ENST00000471319; ENST00000476616; ENST00000478610; ENST00000483151; ENST00000485077; ENST00000491168; ENST00000494550; ENST00000497454; BC032681; OTTHUMT00000076098; OTTHUMT00000076099; OTTHUMT00000076100; OTTHUMT00000276341; OTTHUMT00000276342; OTTHUMT00000276343; OTTHUMT00000276344; OTTHUMT00000276346; OTTHUMT00000276347; OTTHUMT00000276348; OT…	ENSEMBL; GenBank; Havana transcript; RefSeq; ccdsGene; UCSC Genes	ENST00000425946; ENST00000437840; ENST00000460988; ENST00000471319; ENST00000476616; ENST00000478610; ENST00000483151; ENST00000485077; ENST00000491168; ENST00000494550; ENST00000497454; BC032681; OTTHUMT00000076098; OTTHUMT00000076099; OTTHUMT00000076100; OTTHUMT00000276341; OTTHUMT00000276342; OTTHUMT00000276343; OTTHUMT00000276344; OTTHUMT00000276346; OTTHUMT00000276347; OTTHUMT00000276348; OT…	GO:0007265; GO:0043547; GO:0007264; GO:0007165; GO:0035556	ENST00000425946; ENST00000437840; ENST00000460988; ENST00000471319; ENST00000476616; ENST00000478610; ENST00000483151; ENST00000485077; ENST00000491168; ENST00000494550; ENST00000497454; BC032681; OTTHUMT00000076098; OTTHUMT00000076099; OTTHUMT00000076100; OTTHUMT00000276341; OTTHUMT00000276342; OTTHUMT00000276343; OTTHUMT00000276344; OTTHUMT00000276346; OTTHUMT00000276347; OTTHUMT00000276348; OT…	GO:0005622; GO:0005575	ENST00000425946; ENST00000437840; ENST00000460988; ENST00000471319; ENST00000476616; ENST00000478610; ENST00000483151; ENST00000485077; ENST00000491168; ENST00000494550; ENST00000497454; BC032681; OTTHUMT00000076098; OTTHUMT00000076099; OTTHUMT00000076100; OTTHUMT00000276341; OTTHUMT00000276342; OTTHUMT00000276343; OTTHUMT00000276344; OTTHUMT00000276346; OTTHUMT00000276347; OTTHUMT00000276348; OT…	GO:0005088; GO:0005515; GO:0008321; GO:0005085				main	Multiple_Complex	Hs01588054_g1
TSUnmapped00000529.hg.1	6.19	7.7	-2.86	2.86	1	1	6.19	7.7	FMN1	formin 1			Coding			ENST00000632613	ENSEMBL	ENST00000632613	GO:0010467; GO:0035136; GO:0035137; GO:0045010; GO:0048705; GO:0048813; GO:0051127; GO:0051894; GO:0072092; GO:0001822; GO:0030838; GO:0060173	ENST00000632613	GO:0005634; GO:0005737; GO:0005884; GO:0005886; GO:0005912; GO:0015630; GO:0016020; GO:0030054	ENST00000632613	GO:0003779; GO:0008017; GO:0017124				main->unmapped	Coding
TC0300009855.hg.1	10.79	12.3	-2.85	2.85	1	1	10.79	12.3	IL1RAP	interleukin 1 receptor accessory protein	chr3	+	Multiple_Complex	190514051	190659750	NM_001167928; NM_001167929; NM_001167930; NM_001167931; NM_002182; NM_134470; ENST00000072516; ENST00000317757; ENST00000342550; ENST00000412080; ENST00000412504; ENST00000413869; ENST00000422485; ENST00000422625; ENST00000422940; ENST00000434491; ENST00000439062; ENST00000443369; ENST00000447382; ENST00000453359; ENST00000461629; ENST00000465496; ENST00000473566; ENST00000482913; BC053621; OTTHU…	RefSeq; ENSEMBL; GenBank; Havana transcript; UCSC Genes; ccdsGene; lncRNAWiki; circbase; Ace View; RNACentral; NONCODE					NM_001167928; NM_001167929; NM_001167930; NM_001167931; NM_002182; NM_134470; ENST00000072516; ENST00000317757; ENST00000342550; ENST00000412080; ENST00000412504; ENST00000413869; ENST00000422485; ENST00000422625; ENST00000422940; ENST00000434491; ENST00000439062; ENST00000443369; ENST00000447382; ENST00000453359; ENST00000461629; ENST00000465496; ENST00000473566; ENST00000482913; BC053621; OTTHU…	GO:0004871; GO:0004908; GO:0005149; GO:0005515				main	Multiple_Complex	Hs00370506_m1
TSUnmapped00000704.hg.1	3.93	5.44	-2.85	2.85	1	1	3.93	5.44	FMN1	formin 1			Coding			ENST00000631673	ENSEMBL	ENST00000631673	GO:0010467; GO:0035136; GO:0035137; GO:0045010; GO:0048705; GO:0048813; GO:0051127; GO:0051894; GO:0072092; GO:0001822; GO:0030838; GO:0060173	ENST00000631673	GO:0005634; GO:0005737; GO:0005884; GO:0005886; GO:0005912; GO:0015630; GO:0016020; GO:0030054	ENST00000631673	GO:0003779; GO:0008017; GO:0017124				main->unmapped	Coding
TC0100007105.hg.1	8.68	10.19	-2.84	2.84	1	1	8.68	10.19	PADI4	peptidyl arginine deiminase, type IV	chr1	+	Multiple_Complex	17308195	17364004	NM_012387; ENST00000375448; ENST00000375453; ENST00000467001; ENST00000468945; ENST00000487048; BC025718; OTTHUMT00000006799; OTTHUMT00000006800; OTTHUMT00000006801; OTTHUMT00000006802; OTTHUMT00000006803; CCDS180.1; PADI4.cAug10; uc001baj.3; uc057cud.1; uc057cuf.1; uc057cug.1; uc057cuh.1; NONHSAT001239	RefSeq; ENSEMBL; GenBank; Havana transcript; ccdsGene; Ace View; UCSC Genes; lncRNAWiki; NONCODE	NM_012387; ENST00000375448; ENST00000375453; ENST00000467001; ENST00000468945; ENST00000487048; BC025718; OTTHUMT00000006799; OTTHUMT00000006800; OTTHUMT00000006801; OTTHUMT00000006802; OTTHUMT00000006803	GO:0006325; GO:0006334; GO:0006338; GO:0006351; GO:0006355; GO:0006464; GO:0016568; GO:0018101; GO:0019827; GO:0036413; GO:0036414; GO:0045087; GO:0002376	NM_012387; ENST00000375448; ENST00000375453; ENST00000467001; ENST00000468945; ENST00000487048; BC025718; OTTHUMT00000006799; OTTHUMT00000006800; OTTHUMT00000006801; OTTHUMT00000006802; OTTHUMT00000006803	GO:0005634; GO:0005654; GO:0005737	NM_012387; ENST00000375448; ENST00000375453; ENST00000467001; ENST00000468945; ENST00000487048; BC025718; OTTHUMT00000006799; OTTHUMT00000006800; OTTHUMT00000006801; OTTHUMT00000006802; OTTHUMT00000006803	GO:0004668; GO:0005509; GO:0005515; GO:0016990; GO:0016787; GO:0046872	NM_012387; BC025718	HumanCyc	PWY-4921	main	Multiple_Complex	Hs01057472_m1
TC1200009964.hg.1	9.45	10.95	-2.84	2.84	1	1	9.45	10.95	MANSC1	MANSC domain containing 1	chr12	-	Coding	12326056	12350541	NM_018050; ENST00000396349; ENST00000535902; ENST00000543314; ENST00000545735; BC032998; OTTHUMT00000400144; OTTHUMT00000400145; OTTHUMT00000400147; OTTHUMT00000400148; CCDS8648.1; uc001rai.2; uc001raj.2; uc058lif.1; uc058lig.1	RefSeq; ENSEMBL; GenBank; Havana transcript; ccdsGene; UCSC Genes			NM_018050; ENST00000396349; ENST00000535902; ENST00000543314; ENST00000545735; BC032998; OTTHUMT00000400144; OTTHUMT00000400145; OTTHUMT00000400147; OTTHUMT00000400148	GO:0016021; GO:0016020						main	Coding	Hs00944076_m1
TC0100014340.hg.1	4.53	6.03	-2.83	2.83	1	1	4.53	6.03	TACSTD2	tumor-associated calcium signal transducer 2	chr1	-	Coding	58575423	58577773	NM_002353; ENST00000371225; BC009409; OTTHUMT00000027818; CCDS609.1; uc001cyz.5	RefSeq; ENSEMBL; GenBank; Havana transcript; ccdsGene; UCSC Genes	NM_002353; ENST00000371225; BC009409; OTTHUMT00000027818	GO:0007166; GO:0007601; GO:0008283; GO:0010633; GO:0050678; GO:0051497; GO:0060675; GO:0090191; GO:1900025; GO:1900028; GO:2000146; GO:2000738; GO:0050896	NM_002353; ENST00000371225; BC009409; OTTHUMT00000027818	GO:0005615; GO:0005634; GO:0005829; GO:0005887; GO:0009925; GO:0016020; GO:0016328; GO:0070062; GO:0005886; GO:0016021	NM_002353; ENST00000371225; BC009409; OTTHUMT00000027818	GO:0004872; GO:0005515				main	Coding	Hs05055336_s1
TC0500012390.hg.1	8.09	6.59	2.83	2.83	1	1	8.09	6.59	JAKMIP2	janus kinase and microtubule interacting protein 2	chr5	-	Multiple_Complex	147585439	147782848	NM_001270934; NM_001270941; NM_001282282; NM_014790; ENST00000265272; ENST00000333010; ENST00000504845; ENST00000507343; ENST00000507386; ENST00000616793; BC017354; OTTHUMT00000251941; OTTHUMT00000251942; OTTHUMT00000373321; OTTHUMT00000373322; OTTHUMT00000373323; CCDS4285.1; CCDS59495.1; CCDS64284.1; CCDS75352.1; uc003loq.3; uc003lor.3; uc010jgo.3; uc011dbx.3; uc063ikc.1; uc063ike.1	RefSeq; ENSEMBL; GenBank; Havana transcript; ccdsGene; UCSC Genes			NM_001270934; NM_001270941; NM_001282282; NM_014790; ENST00000265272; ENST00000333010; ENST00000504845; ENST00000507343; ENST00000507386; ENST00000616793; BC017354; OTTHUMT00000251941; OTTHUMT00000251942; OTTHUMT00000373321; OTTHUMT00000373322; OTTHUMT00000373323	GO:0005794	NM_001270934; NM_001270941; NM_001282282; NM_014790; ENST00000265272; ENST00000333010; ENST00000504845; ENST00000507343; ENST00000507386; ENST00000616793; BC017354; OTTHUMT00000251941; OTTHUMT00000251942; OTTHUMT00000373321; OTTHUMT00000373322; OTTHUMT00000373323	GO:0005515; GO:0008017; GO:0019900				main	Multiple_Complex	Hs00946483_m1
TC0700008617.hg.1	6.98	8.48	-2.82	2.82	1	1	6.98	8.48	SH2B2	SH2B adaptor protein 2	chr7	+	Multiple_Complex	102285062	102321711	NM_020979; ENST00000444095; ENST00000536178; ENST00000617975; OTTHUMT00000319407; OTTHUMT00000477522; OTTHUMT00000477749; hsa_circ_0081634; hsa_circ_0081635; hsa_circ_0081636; hsa_circ_0081637; hsa_circ_0081638; uc033aba.2; uc064gmq.1; uc064gmr.1	RefSeq; ENSEMBL; Havana transcript; circbase; UCSC Genes	NM_020979; ENST00000444095; ENST00000536178; ENST00000617975; OTTHUMT00000319407; OTTHUMT00000477522; OTTHUMT00000477749	GO:0007165; GO:0007596; GO:0008286; GO:0009967; GO:0035556; GO:0046425; GO:0001922; GO:0007399; GO:0019221; GO:0019222; GO:0030036; GO:0046578; GO:0050776; GO:0050851; GO:0050873	NM_020979; ENST00000444095; ENST00000536178; ENST00000617975; OTTHUMT00000319407; OTTHUMT00000477522; OTTHUMT00000477749	GO:0005737; GO:0005829; GO:0005886; GO:0016020; GO:0001725; GO:0001726; GO:0005884; GO:0005622	NM_020979; ENST00000444095; ENST00000536178; ENST00000617975; OTTHUMT00000319407; OTTHUMT00000477522; OTTHUMT00000477749	GO:0004871; GO:0005070; GO:0005515; GO:0008269; GO:0035591; GO:0005068; GO:0042802				main	Multiple_Complex	Hs00968621_m1
TC1400006562.hg.1	4.65	6.15	-2.82	2.82	1	1	4.65	6.15	RPGRIP1	retinitis pigmentosa GTPase regulator interacting protein 1	chr14	+	Multiple_Complex	21287939	21351301	NM_020366; ENST00000382933; ENST00000400017; ENST00000553500; ENST00000553927; ENST00000554303; ENST00000554750; ENST00000555322; ENST00000555489; ENST00000555587; ENST00000556336; ENST00000557351; ENST00000557606; ENST00000557771; OTTHUMT00000410256; OTTHUMT00000410257; OTTHUMT00000410258; OTTHUMT00000410259; OTTHUMT00000410260; OTTHUMT00000410261; OTTHUMT00000410262; OTTHUMT00000410263; OTTHUMT…	RefSeq; ENSEMBL; Havana transcript; ccdsGene; Ace View; UCSC Genes; lncRNAWiki; NONCODE	NM_020366; ENST00000382933; ENST00000400017; ENST00000553500; ENST00000553927; ENST00000554303; ENST00000554750; ENST00000555322; ENST00000555489; ENST00000555587; ENST00000556336; ENST00000557351; ENST00000557606; ENST00000557771; OTTHUMT00000410256; OTTHUMT00000410257; OTTHUMT00000410258; OTTHUMT00000410259; OTTHUMT00000410260; OTTHUMT00000410261; OTTHUMT00000410262; OTTHUMT00000410263; OTTHUMT…	GO:0007601; GO:0042462; GO:0050896; GO:0060041; GO:0061351	NM_020366; ENST00000382933; ENST00000400017; ENST00000553500; ENST00000553927; ENST00000554303; ENST00000554750; ENST00000555322; ENST00000555489; ENST00000555587; ENST00000556336; ENST00000557351; ENST00000557606; ENST00000557771; OTTHUMT00000410256; OTTHUMT00000410257; OTTHUMT00000410258; OTTHUMT00000410259; OTTHUMT00000410260; OTTHUMT00000410261; OTTHUMT00000410262; OTTHUMT00000410263; OTTHUMT…	GO:0005930; GO:0032391; GO:0005929; GO:0031513; GO:0042995	NM_020366; ENST00000382933; ENST00000400017; ENST00000553500; ENST00000553927; ENST00000554303; ENST00000554750; ENST00000555322; ENST00000555489; ENST00000555587; ENST00000556336; ENST00000557351; ENST00000557606; ENST00000557771; OTTHUMT00000410256; OTTHUMT00000410257; OTTHUMT00000410258; OTTHUMT00000410259; OTTHUMT00000410260; OTTHUMT00000410261; OTTHUMT00000410262; OTTHUMT00000410263; OTTHUMT…	GO:0005515				main	Multiple_Complex	Hs00971448_m1
TC1700010641.hg.1	10.15	11.64	-2.82	2.82	1	1	10.15	11.64	KRT23	keratin 23, type I	chr17	-	Multiple_Complex	40922696	40937643	NM_001282433; NM_015515; ENST00000209718; ENST00000436344; ENST00000462312; ENST00000485751; ENST00000494691; ENST00000582283; ENST00000582754; ENST00000584517; ENST00000585006; BC028356; OTTHUMT00000257223; OTTHUMT00000257224; OTTHUMT00000257225; OTTHUMT00000257226; OTTHUMT00000448166; OTTHUMT00000448167; OTTHUMT00000448168; OTTHUMT00000448169; OTTHUMT00000448170; CCDS11380.1; CCDS62182.1; hsa_c…	RefSeq; ENSEMBL; GenBank; Havana transcript; ccdsGene; circbase; Ace View; UCSC Genes; lncRNAWiki; NONCODE			NM_001282433; NM_015515; ENST00000209718; ENST00000436344; ENST00000462312; ENST00000485751; ENST00000494691; ENST00000582283; ENST00000582754; ENST00000584517; ENST00000585006; BC028356; OTTHUMT00000257223; OTTHUMT00000257224; OTTHUMT00000257225; OTTHUMT00000257226; OTTHUMT00000448166; OTTHUMT00000448167; OTTHUMT00000448168; OTTHUMT00000448169; OTTHUMT00000448170	GO:0005882	NM_001282433; NM_015515; ENST00000209718; ENST00000436344; ENST00000462312; ENST00000485751; ENST00000494691; ENST00000582283; ENST00000582754; ENST00000584517; ENST00000585006; BC028356; OTTHUMT00000257223; OTTHUMT00000257224; OTTHUMT00000257225; OTTHUMT00000257226; OTTHUMT00000448166; OTTHUMT00000448167; OTTHUMT00000448168; OTTHUMT00000448169; OTTHUMT00000448170	GO:0005198				main	Multiple_Complex	Hs00210096_m1
TC0100007206.hg.1	11.14	12.63	-2.81	2.81	1	1	11.14	12.63	CDA	cytidine deaminase	chr1	+	Multiple_Complex	20588948	20618908	NM_001785; ENST00000375071; ENST00000461985; BC054036; OTTHUMT00000007965; OTTHUMT00000007966; CCDS210.1; uc001bdk.4; uc057cze.1	RefSeq; ENSEMBL; GenBank; Havana transcript; ccdsGene; UCSC Genes	NM_001785; ENST00000375071; ENST00000461985; BC054036; OTTHUMT00000007965; OTTHUMT00000007966	GO:0006206; GO:0007166; GO:0008655; GO:0009972; GO:0019858; GO:0030308; GO:0043097; GO:0044281; GO:0045980; GO:0051289; GO:0055086	NM_001785; ENST00000375071; ENST00000461985; BC054036; OTTHUMT00000007965; OTTHUMT00000007966	GO:0005576; GO:0005829	NM_001785; ENST00000375071; ENST00000461985; BC054036; OTTHUMT00000007965; OTTHUMT00000007966	GO:0001882; GO:0004126; GO:0005515; GO:0008270; GO:0042803; GO:0003824; GO:0016787; GO:0042802; GO:0046872	NM_001785	HumanCyc	P1-PWY; PWY0-1295; PWY0-1298; PWY0-181; PWY0-163; DRIBOPMET-PWY	main	Multiple_Complex	Hs00156401_m1
TC0200008632.hg.1	13.07	14.56	-2.81	2.81	1	1	13.07	14.56	RPL31	ribosomal protein L31	chr2	+	Multiple_Complex	101001715	101024032	NM_000993; NM_001098577; NM_001099693; ENST00000264258; ENST00000409000; ENST00000409028; ENST00000409038; ENST00000409320; ENST00000409650; ENST00000409711; ENST00000409733; ENST00000419276; ENST00000441435; ENST00000456292; BC017343; BC070210; BC070373; OTTHUMT00000253182; OTTHUMT00000329093; OTTHUMT00000329094; OTTHUMT00000329095; OTTHUMT00000329096; OTTHUMT00000329104; OTTHUMT00000329105; OTT…	RefSeq; ENSEMBL; GenBank; Havana transcript; ccdsGene; circbase; Ace View; UCSC Genes			NM_000993; NM_001098577; NM_001099693; ENST00000264258; ENST00000409000; ENST00000409028; ENST00000409038; ENST00000409320; ENST00000409650; ENST00000409711; ENST00000409733; ENST00000419276; ENST00000441435; ENST00000456292; BC017343; BC070210; BC070373; OTTHUMT00000253182; OTTHUMT00000329093; OTTHUMT00000329094; OTTHUMT00000329095; OTTHUMT00000329096; OTTHUMT00000329104; OTTHUMT00000329105; OTT…	GO:0005829; GO:0005925; GO:0016020; GO:0022625; GO:0070062; GO:0005622; GO:0005840; GO:0030529	NM_000993; NM_001098577; NM_001099693; ENST00000264258; ENST00000409000; ENST00000409028; ENST00000409038; ENST00000409320; ENST00000409650; ENST00000409711; ENST00000409733; ENST00000419276; ENST00000441435; ENST00000456292; BC017343; BC070210; BC070373; OTTHUMT00000253182; OTTHUMT00000329093; OTTHUMT00000329094; OTTHUMT00000329095; OTTHUMT00000329096; OTTHUMT00000329104; OTTHUMT00000329105; OTT…	GO:0003723; GO:0003735; GO:0044822	NM_000993; NM_001098577; NM_001099693; ENST00000264258; ENST00000409000; ENST00000409028; ENST00000409038; ENST00000409320; ENST00000409650; ENST00000409711; ENST00000409733; ENST00000419276; ENST00000441435; ENST00000456292; BC017343; BC070210; BC070373; OTTHUMT00000253182; OTTHUMT00000329093; OTTHUMT00000329094; OTTHUMT00000329095; OTTHUMT00000329096; OTTHUMT00000329104; OTTHUMT00000329105; OTT…	GenMAPP	Ribosomal_Proteins	main	Multiple_Complex	Hs01015497_g1
TC0200014719.hg.1	10.96	12.45	-2.81	2.81	1	1	10.96	12.45	BAZ2B	bromodomain adjacent to zinc finger domain 2B	chr2	-	Multiple_Complex	159318979	159616692	NM_001289975; NM_013450; ENST00000294905; ENST00000343439; ENST00000392782; ENST00000392783; ENST00000426648; ENST00000437839; ENST00000441143; ENST00000467184; ENST00000472953; ENST00000474437; ENST00000482501; ENST00000482503; ENST00000483316; ENST00000485917; ENST00000541068; ENST00000548440; ENST00000551504; ENST00000552327; OTTHUMT00000255037; OTTHUMT00000255038; OTTHUMT00000333332; OTTHUMT0…	RefSeq; ENSEMBL; Havana transcript; Ace View; ccdsGene; circbase; UCSC Genes; Guo; lncRNAWiki; NONCODE	NM_001289975; NM_013450; ENST00000294905; ENST00000343439; ENST00000392782; ENST00000392783; ENST00000426648; ENST00000437839; ENST00000441143; ENST00000467184; ENST00000472953; ENST00000474437; ENST00000482501; ENST00000482503; ENST00000483316; ENST00000485917; ENST00000541068; ENST00000548440; ENST00000551504; ENST00000552327; OTTHUMT00000255037; OTTHUMT00000255038; OTTHUMT00000333332; OTTHUMT0…	GO:0006351; GO:0006355	NM_001289975; NM_013450; ENST00000294905; ENST00000343439; ENST00000392782; ENST00000392783; ENST00000426648; ENST00000437839; ENST00000441143; ENST00000467184; ENST00000472953; ENST00000474437; ENST00000482501; ENST00000482503; ENST00000483316; ENST00000485917; ENST00000541068; ENST00000548440; ENST00000551504; ENST00000552327; OTTHUMT00000255037; OTTHUMT00000255038; OTTHUMT00000333332; OTTHUMT0…	GO:0005634	NM_001289975; NM_013450; ENST00000294905; ENST00000343439; ENST00000392782; ENST00000392783; ENST00000426648; ENST00000437839; ENST00000441143; ENST00000467184; ENST00000472953; ENST00000474437; ENST00000482501; ENST00000482503; ENST00000483316; ENST00000485917; ENST00000541068; ENST00000548440; ENST00000551504; ENST00000552327; OTTHUMT00000255037; OTTHUMT00000255038; OTTHUMT00000333332; OTTHUMT0…	GO:0003677; GO:0005515; GO:0008270; GO:0046872				main	Multiple_Complex	Hs01002421_m1
TC0300009258.hg.1	10.17	11.66	-2.81	2.81	1	1	10.17	11.66	MME	membrane metallo-endopeptidase	chr3	+	Multiple_Complex	155024124	155183729	NM_000902; NM_007287; NM_007288; NM_007289; ENST00000360490; ENST00000382989; ENST00000460393; ENST00000462745; ENST00000462837; ENST00000473730; ENST00000477669; ENST00000481828; ENST00000491026; ENST00000491597; ENST00000492661; ENST00000493237; ENST00000493888; ENST00000495577; ENST00000497890; ENST00000615825; ENST00000616757; ENST00000625667; BC101632; BC101658; BC143465; OTTHUMT00000351076;…	RefSeq; ENSEMBL; GenBank; Havana transcript; ccdsGene; circbase; Ace View; UCSC Genes; lncRNAWiki; NONCODE										main	Multiple_Complex	Hs01115451_m1
TC0600011823.hg.1	9.48	10.97	-2.81	2.81	1	1	9.48	10.97	TRERF1	transcriptional regulating factor 1	chr6	-	Multiple_Complex	42224931	42452051	NM_001297573; NM_033502; ENST00000340840; ENST00000354325; ENST00000372917; ENST00000372922; ENST00000541110; OTTHUMT00000040551; OTTHUMT00000040552; OTTHUMT00000040553; CCDS4867.1; CCDS75455.1; hsa_circ_0006232; hsa_circ_0076338; hsa_circ_0076339; hsa_circ_0076340; hsa_circ_0076341; hsa_circ_0076342; hsa_circ_0076343; hsa_circ_0076344; TRERF1.aAug10; uc003osc.3; uc003osd.3; uc003ose.3; uc063ont.…	RefSeq; ENSEMBL; Havana transcript; ccdsGene; circbase; Ace View; UCSC Genes; Guo	NM_001297573; NM_033502; ENST00000340840; ENST00000354325; ENST00000372917; ENST00000372922; ENST00000541110; OTTHUMT00000040551; OTTHUMT00000040552; OTTHUMT00000040553	GO:0006351; GO:0006357; GO:0006694; GO:0006707; GO:0007275; GO:0042592; GO:0045893; GO:0046885; GO:0006355; GO:0006366	NM_001297573; NM_033502; ENST00000340840; ENST00000354325; ENST00000372917; ENST00000372922; ENST00000541110; OTTHUMT00000040551; OTTHUMT00000040552; OTTHUMT00000040553	GO:0005634; GO:0005737; GO:0005654	NM_001297573; NM_033502; ENST00000340840; ENST00000354325; ENST00000372917; ENST00000372922; ENST00000541110; OTTHUMT00000040551; OTTHUMT00000040552; OTTHUMT00000040553	GO:0001104; GO:0003700; GO:0008134; GO:0008301; GO:0030374; GO:0046872; GO:0003677; GO:0003682				main	Multiple_Complex	Hs01000682_g1
TC0300013852.hg.1	9.94	11.42	-2.8	2.8	1	1	9.94	11.42	ST3GAL6	ST3 beta-galactoside alpha-2,3-sialyltransferase 6	chr3	+	Multiple_Complex	98732236	98795845	NM_001271142; NM_001271145; NM_001271146; NM_001271147; NM_001271148; NM_006100; ENST00000265261; ENST00000394162; ENST00000460774; ENST00000462152; ENST00000465004; ENST00000466482; ENST00000468553; ENST00000469105; ENST00000474595; ENST00000476833; ENST00000477574; ENST00000477899; ENST00000480133; ENST00000483910; ENST00000485145; ENST00000485391; ENST00000486249; ENST00000486334; ENST00000489…	RefSeq; ENSEMBL; GenBank; Havana transcript; ccdsGene; circbase; Ace View; UCSC Genes; Guo; lncRNAWiki; NONCODE										main	Multiple_Complex	Hs00196086_m1
TC0800008667.hg.1	5.57	7.06	-2.8	2.8	1	1	5.57	7.06	NOV	nephroblastoma overexpressed	chr8	+	Multiple_Complex	119416306	119424438	NM_002514; ENST00000259526; ENST00000520082; BC015028; OTTHUMT00000381301; OTTHUMT00000381303; CCDS6328.1; uc003yoq.3; uc064ptp.1; NONHSAT128433	RefSeq; ENSEMBL; GenBank; Havana transcript; ccdsGene; UCSC Genes; lncRNAWiki; NONCODE	NM_002514; ENST00000259526; ENST00000520082; BC015028; OTTHUMT00000381301; OTTHUMT00000381303	GO:0001525; GO:0002062; GO:0007155; GO:0007165; GO:0007267; GO:0010468; GO:0010761; GO:0010832; GO:0014909; GO:0030308; GO:0033627; GO:0035767; GO:0042347; GO:0044342; GO:0045747; GO:0046676; GO:0048659; GO:0050728; GO:0060326; GO:0060392; GO:0060548; GO:0061484; GO:0071603; GO:0090027; GO:1902731; GO:1904057; GO:1990523; GO:0001558	NM_002514; ENST00000259526; ENST00000520082; BC015028; OTTHUMT00000381301; OTTHUMT00000381303	GO:0005576; GO:0005578; GO:0005737; GO:0005921; GO:0030424; GO:0030425; GO:0043025; GO:0043231; GO:0030054; GO:0031012	NM_002514; ENST00000259526; ENST00000520082; BC015028; OTTHUMT00000381301; OTTHUMT00000381303	GO:0005112; GO:0005178; GO:0005515; GO:0005520; GO:0008083; GO:0008201				main	Multiple_Complex	Hs00982895_g1
TC1700007262.hg.1	11.84	10.35	2.8	2.8	1	1	11.84	10.35	MAP2K3	mitogen-activated protein kinase kinase 3	chr17	+	Multiple_Complex	21284656	21315240	NM_002756; NM_145109; ENST00000316920; ENST00000342679; ENST00000361818; ENST00000395491; ENST00000477540; ENST00000479129; ENST00000483928; ENST00000496046; ENST00000526076; ENST00000527123; ENST00000529517; ENST00000534743; ENST00000583508; ENST00000613338; ENST00000627447; BC032478; OTTHUMT00000259374; OTTHUMT00000259375; OTTHUMT00000259377; OTTHUMT00000259379; OTTHUMT00000259380; OTTHUMT00000…	RefSeq; ENSEMBL; GenBank; Havana transcript; ccdsGene; circbase; UCSC Genes; lncRNAWiki; NONCODE			NM_002756; NM_145109; ENST00000316920; ENST00000342679; ENST00000361818; ENST00000395491; ENST00000477540; ENST00000479129; ENST00000483928; ENST00000496046; ENST00000526076; ENST00000527123; ENST00000529517; ENST00000534743; ENST00000583508; ENST00000613338; ENST00000627447; BC032478; OTTHUMT00000259374; OTTHUMT00000259375; OTTHUMT00000259377; OTTHUMT00000259379; OTTHUMT00000259380; OTTHUMT00000…	GO:0005654; GO:0005737; GO:0005829; GO:0016020; GO:0005622			NM_002756; NM_145109; ENST00000316920; ENST00000342679; ENST00000361818; ENST00000395491; ENST00000477540; ENST00000479129; ENST00000483928; ENST00000496046; ENST00000526076; ENST00000527123; ENST00000529517; ENST00000534743; ENST00000583508; ENST00000613338; ENST00000627447; BC032478; OTTHUMT00000259374; OTTHUMT00000259375; OTTHUMT00000259377; OTTHUMT00000259379; OTTHUMT00000259380; OTTHUMT00000…	GenMAPP	Integrin-mediated_cell_adhesion_KEGG; MAPK_Cascade	main	Multiple_Complex	Hs02799758_g1
TC1900008419.hg.1	10.16	11.65	-2.8	2.8	1	1	10.16	11.65	C5AR2	complement component 5a receptor 2	chr19	+	Multiple_Complex	47332147	47347327	NM_001271749; NM_001271750; NM_018485; ENST00000595464; ENST00000600626; BC067477; BC067478; BC067479; BC067480; CCDS12699.1; ENST00000601565.1; uc002pgk.3; uc010ela.2; NONHSAT066964; OTTHUMT00000466926; OTTHUMT00000466927	RefSeq; ENSEMBL; GenBank; ccdsGene; lncRNAWiki; UCSC Genes; NONCODE; Havana transcript	NM_001271749; NM_001271750; NM_018485; ENST00000595464; ENST00000600626; BC067477; BC067478; BC067479; BC067480; OTTHUMT00000466926; OTTHUMT00000466927	GO:0006935; GO:0006954; GO:0007186; GO:0032720; GO:0050679; GO:0070374; GO:0090024; GO:1900165; GO:2000482; GO:0007165	NM_001271749; NM_001271750; NM_018485; ENST00000595464; ENST00000600626; BC067477; BC067478; BC067479; BC067480; OTTHUMT00000466926; OTTHUMT00000466927	GO:0005886; GO:0009925; GO:0016021; GO:0045177; GO:0016020	NM_001271749; NM_001271750; NM_018485; ENST00000595464; ENST00000600626; BC067477; BC067478; BC067479; BC067480; OTTHUMT00000466926; OTTHUMT00000466927	GO:0004944; GO:0005515; GO:0004871; GO:0004930	NM_001271749; NM_001271750; NM_018485; ENST00000595464; ENST00000600626; BC067477; BC067478; BC067479; BC067480	GenMAPP	GPCRDB_Class_A_Rhodopsin-like; GPCRDB_Other; Peptide_GPCRs	main	Multiple_Complex	Hs01933768_s1
TC0200014725.hg.1	6.8	8.28	-2.79	2.79	1	1	6.8	8.28	BAZ2B	bromodomain adjacent to zinc finger domain 2B	chr2	-	NonCoding	159670708	159712435	NR_110586; ENST00000418770; ENST00000453016; ENST00000607836; ENST00000418770.1; ENST00000453016.1; ENST00000607836.1; OTTHUMT00000333764; OTTHUMT00000333765; OTTHUMT00000470763; uc002uaw.4; uc061owj.1; uc061owk.1; HG494785.1:1..401:ncRNA; HG494786.1:1..375:ncRNA; HG494787.1:1..2520:ncRNA; hsa_circ_0056836; NONHSAT075117; NONHSAT075118; NONHSAT075119	RefSeq; ENSEMBL; lncRNAWiki; Havana transcript; UCSC Genes; RNACentral; circbase; NONCODE	NR_110586; ENST00000418770; ENST00000453016; ENST00000607836	GO:0006351; GO:0006355	NR_110586; ENST00000418770; ENST00000453016; ENST00000607836	GO:0005634	NR_110586; ENST00000418770; ENST00000453016; ENST00000607836	GO:0003677; GO:0005515; GO:0008270; GO:0046872				main	NonCoding	Hs01003107_m1
TC1000006652.hg.1	7.98	9.46	-2.79	2.79	1	1	7.98	9.46	PFKFB3	6-phosphofructo-2-kinase/fructose-2,6-biphosphatase 3	chr10	+	Multiple_Complex	6144880	6235545	NM_001145443; NM_001282630; NM_004566; ENST00000317350; ENST00000360521; ENST00000379775; ENST00000379785; ENST00000379789; ENST00000414237; ENST00000441697; ENST00000450232; ENST00000461744; ENST00000467491; ENST00000475881; ENST00000477914; ENST00000487989; ENST00000490474; ENST00000536985; ENST00000625260; ENST00000626882; BC040482; OTTHUMT00000046646; OTTHUMT00000046647; OTTHUMT00000046649; O…	RefSeq; ENSEMBL; GenBank; Havana transcript; ccdsGene; circbase; Ace View; UCSC Genes; lncRNAWiki; NONCODE			NM_001145443; NM_001282630; NM_004566; ENST00000317350; ENST00000360521; ENST00000379775; ENST00000379785; ENST00000379789; ENST00000414237; ENST00000441697; ENST00000450232; ENST00000461744; ENST00000467491; ENST00000475881; ENST00000477914; ENST00000487989; ENST00000490474; ENST00000536985; ENST00000625260; ENST00000626882; BC040482; OTTHUMT00000046646; OTTHUMT00000046647; OTTHUMT00000046649; O…	GO:0005654; GO:0005829	NM_001145443; NM_001282630; NM_004566; ENST00000317350; ENST00000360521; ENST00000379775; ENST00000379785; ENST00000379789; ENST00000414237; ENST00000441697; ENST00000450232; ENST00000461744; ENST00000467491; ENST00000475881; ENST00000477914; ENST00000487989; ENST00000490474; ENST00000536985; ENST00000625260; ENST00000626882; BC040482; OTTHUMT00000046646; OTTHUMT00000046647; OTTHUMT00000046649; O…	GO:0003873; GO:0004331; GO:0005524; GO:0000166; GO:0003824; GO:0016301; GO:0016740; GO:0016787				main	Multiple_Complex	Hs00998703_mH
TC1200012617.hg.1	9.88	11.35	-2.79	2.79	1	1	9.88	11.35	FGD4	FYVE, RhoGEF and PH domain containing 4	chr12	+	Multiple_Complex	32502043	32646051	NM_001304480; NM_001304483; NM_001304484; NM_139241; ENST00000395740; ENST00000427716; ENST00000472289; ENST00000473513; ENST00000479023; ENST00000493087; ENST00000494275; ENST00000494977; ENST00000497153; ENST00000525053; ENST00000546442; ENST00000551984; ENST00000583694; BC045552; OTTHUMT00000268017; OTTHUMT00000268018; OTTHUMT00000268019; OTTHUMT00000268020; OTTHUMT00000268021; OTTHUMT00000268…	RefSeq; ENSEMBL; GenBank; Havana transcript; ccdsGene; Ace View; circbase; UCSC Genes; Guo; lncRNAWiki; NONCODE			NM_001304480; NM_001304483; NM_001304484; NM_139241; ENST00000395740; ENST00000427716; ENST00000472289; ENST00000473513; ENST00000479023; ENST00000493087; ENST00000494275; ENST00000494977; ENST00000497153; ENST00000525053; ENST00000546442; ENST00000551984; ENST00000583694; BC045552; OTTHUMT00000268017; OTTHUMT00000268018; OTTHUMT00000268019; OTTHUMT00000268020; OTTHUMT00000268021; OTTHUMT00000268…	GO:0001726; GO:0005737; GO:0005794; GO:0005829; GO:0015629; GO:0030027; GO:0030175; GO:0005856; GO:0042995	NM_001304480; NM_001304483; NM_001304484; NM_139241; ENST00000395740; ENST00000427716; ENST00000472289; ENST00000473513; ENST00000479023; ENST00000493087; ENST00000494275; ENST00000494977; ENST00000497153; ENST00000525053; ENST00000546442; ENST00000551984; ENST00000583694; BC045552; OTTHUMT00000268017; OTTHUMT00000268018; OTTHUMT00000268019; OTTHUMT00000268020; OTTHUMT00000268021; OTTHUMT00000268…	GO:0003779; GO:0005085; GO:0005089; GO:0031267; GO:0046872				main	Multiple_Complex	Hs01030790_m1
TC0200010416.hg.1	6.42	4.95	2.78	2.78	1	1	6.42	4.95	SPATS2L	Transcript Identified by AceView, Entrez Gene ID(s) 26010	chr2	+	Unassigned	200422478	200422865	SPATS2L.voAug10-unspliced	Ace View										main	Unassigned	Hs05369292_s1
TC0900012140.hg.1	5.21	6.69	-2.78	2.78	1	1	5.21	6.69	PGM5	phosphoglucomutase 5	chr9	+	NonCoding	68396524	68406344	ENST00000587852; OTTHUMT00000470473; uc064toh.1; NONHSAT131743	ENSEMBL; Havana transcript; UCSC Genes; lncRNAWiki; NONCODE	ENST00000587852; OTTHUMT00000470473	GO:0005978; GO:0006006; GO:0007155; GO:0019388; GO:0005975; GO:0071704	ENST00000587852; OTTHUMT00000470473	GO:0001725; GO:0005829; GO:0005913; GO:0005914; GO:0005925; GO:0009898; GO:0014704; GO:0016010; GO:0030018; GO:0042383; GO:0043034; GO:0005737; GO:0005856; GO:0005912; GO:0030054; GO:0030055	ENST00000587852; OTTHUMT00000470473	GO:0000287; GO:0004614; GO:0005198; GO:0016868; GO:0046872				main	NonCoding	Hs04997589_m1
TC0X00007039.hg.1	7.1	8.58	-2.78	2.78	1	1	7.1	8.58	GPR34	G protein-coupled receptor 34	chrX	+	Coding	41688973	41697277	NM_001097579; NM_005300; ENST00000378138; ENST00000378142; ENST00000620846; BC020678; OTTHUMT00000056264; OTTHUMT00000056265; uc004dfp.4; CCDS14258.1; uc004dfq.5; uc064yra.1	RefSeq; ENSEMBL; GenBank; Havana transcript; UCSC Genes; ccdsGene	NM_001097579; NM_005300; ENST00000378138; ENST00000378142; ENST00000620846; BC020678; OTTHUMT00000056264; OTTHUMT00000056265; uc004dfp.4	GO:0007186; GO:0035589; GO:0007165	NM_001097579; NM_005300; ENST00000378138; ENST00000378142; ENST00000620846; BC020678; OTTHUMT00000056264; OTTHUMT00000056265; uc004dfp.4	GO:0005887; GO:0005886; GO:0016020; GO:0016021	NM_001097579; NM_005300; ENST00000378138; ENST00000378142; ENST00000620846; BC020678; OTTHUMT00000056264; OTTHUMT00000056265; uc004dfp.4	GO:0004930; GO:0045028; GO:0004871	NM_001097579; NM_005300; ENST00000378138; ENST00000378142; ENST00000620846; BC020678; OTTHUMT00000056264; OTTHUMT00000056265; uc004dfp.4	GenMAPP	GPCRDB_Class_A_Rhodopsin-like2	main	Coding	Hs00271105_s1
TC1500010899.hg.1	9.82	11.29	-2.78	2.78	1	1	9.82	11.29	ST20-MTHFS	ST20-MTHFS readthrough	chr15	-	Multiple_Complex	79843547	79923754	NM_001199760; ENST00000479961; ENST00000494999; OTTHUMT00000416727; OTTHUMT00000433309; CCDS58394.1; uc059mhy.1; uc059mhz.1	RefSeq; ENSEMBL; Havana transcript; ccdsGene; UCSC Genes	NM_001199760; ENST00000479961; OTTHUMT00000433309	GO:0006536; GO:0009396; GO:0015942; GO:0035999; GO:0046653; GO:0046657; GO:0008152	NM_001199760	GO:0005737; GO:0005759	NM_001199760; ENST00000479961; OTTHUMT00000433309	GO:0000166; GO:0005524; GO:0005542; GO:0016874; GO:0030272; GO:0046872				main	Multiple_Complex	Hs01548834_m1
TC0100016206.hg.1	8.86	10.33	-2.77	2.77	1	1	8.86	10.33	SH2D1B	SH2 domain containing 1B	chr1	-	Multiple_Complex	162395266	162412138	NM_053282; ENST00000367929; ENST00000493550; BC022407; BC066595; OTTHUMT00000076794; OTTHUMT00000076795; CCDS30928.1; SH2D1B.bAug10; uc001gbz.2; uc057mup.1; NONHSAT007219	RefSeq; ENSEMBL; GenBank; Havana transcript; ccdsGene; Ace View; UCSC Genes; lncRNAWiki; NONCODE	NM_053282; ENST00000367929; ENST00000493550; BC022407; BC066595; OTTHUMT00000076794; OTTHUMT00000076795	GO:0002366; GO:0002717; GO:0045089; GO:0050776	NM_053282; ENST00000367929; ENST00000493550; BC022407; BC066595; OTTHUMT00000076794; OTTHUMT00000076795	GO:0005622; GO:0005829	NM_053282; ENST00000367929; ENST00000493550; BC022407; BC066595; OTTHUMT00000076794; OTTHUMT00000076795	GO:0005515; GO:0030674				main	Multiple_Complex	Hs01114628_m1
TC0800007978.hg.1	9.27	10.74	-2.77	2.77	1	1	9.27	10.74	LY96	lymphocyte antigen 96	chr8	+	Coding	73991329	74029087	NM_001195797; NM_015364; ENST00000284818; ENST00000518893; BC020690; OTTHUMT00000379032; OTTHUMT00000379088; CCDS56540.1; CCDS6216.1; uc003yad.4; uc022awb.2	RefSeq; ENSEMBL; GenBank; Havana transcript; ccdsGene; UCSC Genes	NM_001195797; NM_015364; ENST00000284818; ENST00000518893; BC020690; OTTHUMT00000379032; OTTHUMT00000379088	GO:0002224; GO:0002755; GO:0002756; GO:0006915; GO:0006954; GO:0006968; GO:0007166; GO:0007249; GO:0012501; GO:0031663; GO:0031666; GO:0032496; GO:0032497; GO:0032760; GO:0034134; GO:0034138; GO:0034142; GO:0035666; GO:0038123; GO:0038124; GO:0045087; GO:0097191; GO:0097296; GO:0002376	NM_001195797; NM_015364; ENST00000284818; ENST00000518893; BC020690; OTTHUMT00000379032; OTTHUMT00000379088	GO:0005615; GO:0005886; GO:0010008; GO:0031226; GO:0046696; GO:0005576	NM_001195797; NM_015364; ENST00000284818; ENST00000518893; BC020690; OTTHUMT00000379032; OTTHUMT00000379088	GO:0001875; GO:0005515; GO:0015026				main	Coding	Hs01026733_m1
TC0900011072.hg.1	9.28	10.75	-2.77	2.77	1	1	9.28	10.75	ABCA1	ATP binding cassette subfamily A member 1	chr9	-	Multiple_Complex	104781002	104928246	NM_005502; ENST00000374733; ENST00000374736; ENST00000423487; ENST00000494467; BC146856; OTTHUMT00000053491; OTTHUMT00000053492; OTTHUMT00000053493; OTTHUMT00000053494; CCDS6762.1; hsa_circ_0005443; hsa_circ_0087801; hsa_circ_0087802; hsa_circ_0087803; hsa_circ_0087804; hsa_circ_0087805; hsa_circ_0087806; hsa_circ_0087807; hsa_circ_0087808; hsa_circ_0087809; hsa_circ_0087810; hsa_circ_0087811; hs…	RefSeq; ENSEMBL; GenBank; Havana transcript; ccdsGene; circbase; UCSC Genes; Guo			NM_005502; ENST00000374733; ENST00000374736; ENST00000423487; ENST00000494467; BC146856; OTTHUMT00000053491; OTTHUMT00000053492; OTTHUMT00000053493; OTTHUMT00000053494	GO:0005794; GO:0005886; GO:0005887; GO:0009897; GO:0030139; GO:0045121; GO:0045335; GO:0048471; GO:0016020; GO:0016021; GO:0043231; GO:0009986; GO:0034364	NM_005502; ENST00000374733; ENST00000374736; ENST00000423487; ENST00000494467; BC146856; OTTHUMT00000053491; OTTHUMT00000053492; OTTHUMT00000053493; OTTHUMT00000053494	GO:0005102; GO:0005515; GO:0005524; GO:0005543; GO:0005548; GO:0008509; GO:0015485; GO:0017127; GO:0019905; GO:0031267; GO:0034185; GO:0034186; GO:0034188; GO:0042626; GO:0051117; GO:0000166; GO:0005215; GO:0016887	NM_005502; ENST00000374733; ENST00000374736; ENST00000423487; ENST00000494467; BC146856; OTTHUMT00000053491; OTTHUMT00000053492; OTTHUMT00000053493; OTTHUMT00000053494	GenMAPP	Statin_Pathway_PharmGKB	main	Multiple_Complex	Hs01059104_m1
TSUnmapped00000475.hg.1	8.72	10.19	-2.77	2.77	1	1	8.72	10.19	PADI4	peptidyl arginine deiminase, type IV			NonCoding			ENST00000627887	ENSEMBL	ENST00000627887	GO:0006325; GO:0006334; GO:0006338; GO:0006351; GO:0006355; GO:0006464; GO:0016568; GO:0018101; GO:0019827; GO:0036413; GO:0036414; GO:0045087; GO:0002376	ENST00000627887	GO:0005634; GO:0005654; GO:0005737	ENST00000627887	GO:0004668; GO:0005509; GO:0005515; GO:0016990; GO:0016787; GO:0046872				main->unmapped	NonCoding
TC0400012828.hg.1	11.87	10.4	2.76	2.76	1	1	11.87	10.4	BANK1	B-cell scaffold protein with ankyrin repeats 1	chr4	+	Multiple_Complex	101790607	102074812	NM_001083907; NM_001127507; NM_017935; ENST00000322953; ENST00000428908; ENST00000444316; ENST00000504403; ENST00000508653; ENST00000510950; BC032241; OTTHUMT00000363161; OTTHUMT00000363162; OTTHUMT00000363163; OTTHUMT00000363166; OTTHUMT00000363167; CCDS34038.1; CCDS47115.1; CCDS47116.1; uc003hvy.5; uc003hvz.5; uc010ill.4; uc062ynu.1; uc062ynw.1; uc062ynx.1; NONHSAT097576	RefSeq; ENSEMBL; GenBank; Havana transcript; ccdsGene; UCSC Genes; lncRNAWiki; NONCODE	NM_001083907; NM_001127507; NM_017935; ENST00000322953; ENST00000428908; ENST00000444316; ENST00000504403; ENST00000508653; ENST00000510950; BC032241; OTTHUMT00000363161; OTTHUMT00000363162; OTTHUMT00000363163; OTTHUMT00000363166; OTTHUMT00000363167	GO:0042113; GO:0043410; GO:0045947; GO:0050869; GO:0051898; GO:1900165			ENST00000322953	GO:0005515				main	Multiple_Complex	Hs01009378_m1
TC0900010147.hg.1	7.81	9.27	-2.76	2.76	1	1	7.81	9.27	CNTNAP3B	contactin associated protein-like 3B	chr9	-	Multiple_Complex	41890314	42129510	NM_001201380; OTTHUMT00000036930; OTTHUMT00000129769; OTTHUMT00000129770; OTTHUMT00000143893; OTTHUMT00000143894; OTTHUMT00000143895; OTTHUMT00000143896; OTTHUMT00000143897; OTTHUMT00000143898; OTTHUMT00000143899; OTTHUMT00000477527; OTTHUMT00000477531; OTTHUMT00000477547; OTTHUMT00000477548; OTTHUMT00000477549; CCDS75836.1; uc004abq.3; uc064thk.1; uc064thl.1; uc064thm.1; uc064thn.1; uc064tho.1; …	RefSeq; Havana transcript; ccdsGene; UCSC Genes; ENSEMBL; lncRNAWiki; NONCODE; lncRNA Db	NM_001201380; OTTHUMT00000036930; OTTHUMT00000129769; OTTHUMT00000129770; OTTHUMT00000143893; OTTHUMT00000143894; OTTHUMT00000143895; OTTHUMT00000143896; OTTHUMT00000143897; OTTHUMT00000143898; OTTHUMT00000143899; OTTHUMT00000477527; OTTHUMT00000477531; OTTHUMT00000477547; OTTHUMT00000477548; OTTHUMT00000477549; ENST00000276974; ENST00000341990; ENST00000377561; ENST00000467854; ENST00000476961; …	GO:0007155	NM_001201380; OTTHUMT00000036930; OTTHUMT00000129769; OTTHUMT00000129770; OTTHUMT00000143893; OTTHUMT00000143894; OTTHUMT00000143895; OTTHUMT00000143896; OTTHUMT00000143897; OTTHUMT00000143898; OTTHUMT00000143899; OTTHUMT00000477527; OTTHUMT00000477531; OTTHUMT00000477547; OTTHUMT00000477548; OTTHUMT00000477549; ENST00000276974; ENST00000341990; ENST00000377561; ENST00000467854; ENST00000476961; …	GO:0016021; GO:0016020	ENST00000341990; ENST00000377561; ENST00000612828	GO:0005515				main	Multiple_Complex	Hs00276736_m1
TC1000009296.hg.1	8.69	10.16	-2.76	2.76	1	1	8.69	10.16	PTPRE	protein tyrosine phosphatase, receptor type, E	chr10	+	Multiple_Complex	127907061	128085900	NM_006504; NM_130435; ENST00000254667; ENST00000306042; ENST00000442830; ENST00000455661; ENST00000463727; ENST00000467366; ENST00000471218; ENST00000479896; ENST00000487428; ENST00000492479; ENST00000495530; BC050062; OTTHUMT00000050988; OTTHUMT00000050989; OTTHUMT00000050990; OTTHUMT00000050991; OTTHUMT00000050992; OTTHUMT00000050993; OTTHUMT00000050994; OTTHUMT00000050995; OTTHUMT00000050996; …	RefSeq; ENSEMBL; GenBank; Havana transcript; ccdsGene; circbase; Ace View; UCSC Genes; lncRNAWiki; NONCODE	NM_006504; NM_130435; ENST00000254667; ENST00000306042; ENST00000442830; ENST00000455661; ENST00000463727; ENST00000467366; ENST00000471218; ENST00000479896; ENST00000487428; ENST00000492479; ENST00000495530; BC050062; OTTHUMT00000050988; OTTHUMT00000050989; OTTHUMT00000050990; OTTHUMT00000050991; OTTHUMT00000050992; OTTHUMT00000050993; OTTHUMT00000050994; OTTHUMT00000050995; OTTHUMT00000050996; …	GO:0006470; GO:0007185; GO:0033003; GO:0035335; GO:0046627; GO:0016311	NM_006504; NM_130435; ENST00000254667; ENST00000306042; ENST00000442830; ENST00000455661; ENST00000463727; ENST00000467366; ENST00000471218; ENST00000479896; ENST00000487428; ENST00000492479; ENST00000495530; BC050062; OTTHUMT00000050988; OTTHUMT00000050989; OTTHUMT00000050990; OTTHUMT00000050991; OTTHUMT00000050992; OTTHUMT00000050993; OTTHUMT00000050994; OTTHUMT00000050995; OTTHUMT00000050996; …	GO:0005634; GO:0005737; GO:0005886; GO:0016021; GO:0016020	NM_006504; NM_130435; ENST00000254667; ENST00000306042; ENST00000442830; ENST00000455661; ENST00000463727; ENST00000467366; ENST00000471218; ENST00000479896; ENST00000487428; ENST00000492479; ENST00000495530; BC050062; OTTHUMT00000050988; OTTHUMT00000050989; OTTHUMT00000050990; OTTHUMT00000050991; OTTHUMT00000050992; OTTHUMT00000050993; OTTHUMT00000050994; OTTHUMT00000050995; OTTHUMT00000050996; …	GO:0005001; GO:0005515; GO:0042803; GO:0004721; GO:0004725; GO:0016787; GO:0016791				main	Multiple_Complex	Hs01037742_m1
TC1900011524.hg.1	6.89	5.42	2.76	2.76	1	1	6.89	5.42	ZNF667	zinc finger protein 667	chr19	-	Multiple_Complex	56439324	56478065	NM_022103; NR_030740; ENST00000292069; ENST00000504904; ENST00000587555; ENST00000589652; ENST00000589946; ENST00000591790; ENST00000592189; ENST00000629654; BC074898; BC074899; BC136388; BC150593; OTTHUMT00000458393; OTTHUMT00000458394; OTTHUMT00000458395; OTTHUMT00000458396; OTTHUMT00000458397; OTTHUMT00000458398; OTTHUMT00000458414; CCDS12944.1; uc002qnd.4; uc002qne.4; uc061dgb.1; uc061dgc.1; …	RefSeq; ENSEMBL; GenBank; Havana transcript; ccdsGene; UCSC Genes; Ace View; lncRNAWiki; NONCODE	NM_022103; NR_030740; ENST00000292069; ENST00000504904; ENST00000587555; ENST00000589652; ENST00000589946; ENST00000591790; ENST00000592189; ENST00000629654; BC074898; BC074899; BC136388; BC150593; OTTHUMT00000458393; OTTHUMT00000458394; OTTHUMT00000458395; OTTHUMT00000458396; OTTHUMT00000458397; OTTHUMT00000458398; OTTHUMT00000458414	GO:0006351; GO:0006357; GO:0006355	NM_022103; NR_030740; ENST00000292069; ENST00000504904; ENST00000587555; ENST00000589652; ENST00000589946; ENST00000591790; ENST00000592189; ENST00000629654; BC074898; BC074899; BC136388; BC150593; OTTHUMT00000458393; OTTHUMT00000458394; OTTHUMT00000458395; OTTHUMT00000458396; OTTHUMT00000458397; OTTHUMT00000458398; OTTHUMT00000458414	GO:0005634; GO:0005622	NM_022103; NR_030740; ENST00000292069; ENST00000504904; ENST00000587555; ENST00000589652; ENST00000589946; ENST00000591790; ENST00000592189; ENST00000629654; BC074898; BC074899; BC136388; BC150593; OTTHUMT00000458393; OTTHUMT00000458394; OTTHUMT00000458395; OTTHUMT00000458396; OTTHUMT00000458397; OTTHUMT00000458398; OTTHUMT00000458414	GO:0003677; GO:0003712; GO:0046872; GO:0003676				main	Multiple_Complex	Hs00254426_s1
TC0100010149.hg.1	5.39	3.94	2.75	2.75	1	1	5.39	3.94	RAB25	RAB25, member RAS oncogene family	chr1	+	Multiple_Complex	156061160	156070514	NM_020387; ENST00000361084; ENST00000463614; ENST00000473336; ENST00000487325; ENST00000497968; ENST00000615862; BC009831; BC033322; OTTHUMT00000046185; OTTHUMT00000046186; OTTHUMT00000046187; OTTHUMT00000046188; OTTHUMT00000046189; CCDS41413.1; hsa_circ_0014672; hsa_circ_0014673; uc001fnc.4; uc057lvk.1; uc057lvl.1; uc057lvm.1; uc057lvn.1; uc057lvo.1; NONHSAT006799	RefSeq; ENSEMBL; GenBank; Havana transcript; ccdsGene; circbase; UCSC Genes; lncRNAWiki; NONCODE	NM_020387; ENST00000361084; ENST00000463614; ENST00000473336; ENST00000487325; ENST00000497968; ENST00000615862; BC009831; BC033322; OTTHUMT00000046185; OTTHUMT00000046186; OTTHUMT00000046187; OTTHUMT00000046188; OTTHUMT00000046189	GO:0003382; GO:0006886; GO:0006887; GO:0008284; GO:0010634; GO:0031268; GO:0032402; GO:0032482; GO:0060627; GO:0006810; GO:0007264; GO:0015031; GO:0007165; GO:0006913; GO:0008152	NM_020387; ENST00000361084; ENST00000463614; ENST00000473336; ENST00000487325; ENST00000497968; ENST00000615862; BC009831; BC033322; OTTHUMT00000046185; OTTHUMT00000046186; OTTHUMT00000046187; OTTHUMT00000046188; OTTHUMT00000046189	GO:0016023; GO:0031143; GO:0031260; GO:0031410; GO:0055037; GO:0070062; GO:0005886; GO:0016020; GO:0042995; GO:0005622	NM_020387; ENST00000361084; ENST00000463614; ENST00000473336; ENST00000487325; ENST00000497968; ENST00000615862; BC009831; BC033322; OTTHUMT00000046185; OTTHUMT00000046186; OTTHUMT00000046187; OTTHUMT00000046188; OTTHUMT00000046189	GO:0003924; GO:0005515; GO:0005525; GO:0031489; GO:0000166				main	Multiple_Complex	Hs01040784_m1
TC0100012675.hg.1	6.81	5.35	2.75	2.75	1	1	6.81	5.35	ACOT7	acyl-CoA thioesterase 7	chr1	-	Multiple_Complex	6264269	6394391	NM_007274; NM_181864; NM_181865; NM_181866; ENST00000361521; ENST00000377842; ENST00000377845; ENST00000377855; ENST00000377860; ENST00000418124; ENST00000473466; ENST00000481175; ENST00000545482; ENST00000608083; BC017365; OTTHUMT00000003773; OTTHUMT00000003774; OTTHUMT00000003775; OTTHUMT00000003776; OTTHUMT00000003777; OTTHUMT00000003778; OTTHUMT00000003779; OTTHUMT00000003780; OTTHUMT00000473…	RefSeq; ENSEMBL; GenBank; Havana transcript; Ace View; ccdsGene; circbase; UCSC Genes; lncRNAWiki; NONCODE	NM_007274; NM_181864; NM_181865; NM_181866; ENST00000361521; ENST00000377842; ENST00000377845; ENST00000377855; ENST00000377860; ENST00000418124; ENST00000473466; ENST00000481175; ENST00000545482; ENST00000608083; BC017365; OTTHUMT00000003773; OTTHUMT00000003774; OTTHUMT00000003775; OTTHUMT00000003776; OTTHUMT00000003777; OTTHUMT00000003778; OTTHUMT00000003779; OTTHUMT00000003780; OTTHUMT00000473…	GO:0009062; GO:0015937; GO:0019432; GO:0035338; GO:0036114; GO:0036116; GO:0044255; GO:0044281; GO:0051792; GO:1900535; GO:0008152	NM_007274; NM_181864; NM_181865; NM_181866; ENST00000361521; ENST00000377842; ENST00000377845; ENST00000377855; ENST00000377860; ENST00000418124; ENST00000473466; ENST00000481175; ENST00000545482; ENST00000608083; BC017365; OTTHUMT00000003773; OTTHUMT00000003774; OTTHUMT00000003775; OTTHUMT00000003776; OTTHUMT00000003777; OTTHUMT00000003778; OTTHUMT00000003779; OTTHUMT00000003780; OTTHUMT00000473…	GO:0005654; GO:0005737; GO:0005739; GO:0005829; GO:0043005; GO:0044297; GO:0070062	NM_007274; NM_181864; NM_181865; NM_181866; ENST00000361521; ENST00000377842; ENST00000377845; ENST00000377855; ENST00000377860; ENST00000418124; ENST00000473466; ENST00000481175; ENST00000545482; ENST00000608083; BC017365; OTTHUMT00000003773; OTTHUMT00000003774; OTTHUMT00000003775; OTTHUMT00000003776; OTTHUMT00000003777; OTTHUMT00000003778; OTTHUMT00000003779; OTTHUMT00000003780; OTTHUMT00000473…	GO:0000062; GO:0005515; GO:0016290; GO:0036042; GO:0042803; GO:0052689; GO:0016787; GO:0047617				main	Multiple_Complex	Hs01012663_g1
TC0500008849.hg.1	9.85	11.32	-2.75	2.75	1	1	9.85	11.32	CYSTM1	cysteine-rich transmembrane module containing 1	chr5	+	Multiple_Complex	140174642	140282052	NM_032412; ENST00000261811; ENST00000504227; ENST00000509589; ENST00000509789; BC013643; BC023982; OTTHUMT00000251342; OTTHUMT00000372818; OTTHUMT00000372819; OTTHUMT00000372820; C5orf32.fAug10; CCDS4221.1; hsa_circ_0002449; hsa_circ_0074238; hsa_circ_0074239; uc003lfd.4; uc063htv.1; uc063htw.1; uc063htx.1; NONHSAT104171; NONHSAT104172; NONHSAT104173	RefSeq; ENSEMBL; GenBank; Havana transcript; Ace View; ccdsGene; circbase; UCSC Genes; lncRNAWiki; NONCODE	NM_032412; ENST00000261811; ENST00000504227; ENST00000509589; ENST00000509789; BC013643; BC023982; OTTHUMT00000251342; OTTHUMT00000372818; OTTHUMT00000372819; OTTHUMT00000372820	GO:0008150	NM_032412; ENST00000261811; ENST00000504227; ENST00000509589; ENST00000509789; BC013643; BC023982; OTTHUMT00000251342; OTTHUMT00000372818; OTTHUMT00000372819; OTTHUMT00000372820	GO:0016021; GO:0070062; GO:0016020	NM_032412; ENST00000261811; ENST00000504227; ENST00000509589; ENST00000509789; BC013643; BC023982; OTTHUMT00000251342; OTTHUMT00000372818; OTTHUMT00000372819; OTTHUMT00000372820	GO:0003674				main	Multiple_Complex	Hs00260900_m1
TC0600011140.hg.1	8.41	6.95	2.75	2.75	1	1	8.41	6.95	HIST1H3F	histone cluster 1, H3f	chr6	-	Coding	26250141	26250607	NM_021018; ENST00000618052; BC067492; BC069818; BC096131; OTTHUMT00000040098; CCDS4600.1; HIST1H3F.aAug10-unspliced; uc003nhg.2	RefSeq; ENSEMBL; GenBank; Havana transcript; ccdsGene; Ace View; UCSC Genes	NM_021018; ENST00000618052; BC067492; BC069818; BC096131; OTTHUMT00000040098	GO:0000183; GO:0002230; GO:0006325; GO:0006334; GO:0006335; GO:0007264; GO:0007596; GO:0010467; GO:0031047; GO:0032776; GO:0040029; GO:0044267; GO:0045814; GO:0051290; GO:0060968; GO:0098792	NM_021018; ENST00000618052; BC067492; BC069818; BC096131; OTTHUMT00000040098	GO:0000228; GO:0000786; GO:0000788; GO:0005576; GO:0005634; GO:0005654; GO:0016020; GO:0043234; GO:0070062; GO:0005694	NM_021018; ENST00000618052; BC067492; BC069818; BC096131; OTTHUMT00000040098	GO:0003677; GO:0005515; GO:0042393; GO:0046982				main	Coding	Hs00819633_s1
TC0600011233.hg.1	10.3	8.84	2.75	2.75	1	1	10.3	8.84	HIST1H3I	histone cluster 1, H3i	chr6	-	Coding	27871845	27872321	NM_003533; ENST00000616365; BC066884; BC067493; BC069305; OTTHUMT00000043452; CCDS4636.1; uc003njy.4	RefSeq; ENSEMBL; GenBank; Havana transcript; ccdsGene; UCSC Genes	NM_003533; ENST00000616365; BC066884; BC067493; BC069305; OTTHUMT00000043452	GO:0000183; GO:0002230; GO:0006325; GO:0006334; GO:0006335; GO:0007264; GO:0007596; GO:0010467; GO:0031047; GO:0032776; GO:0040029; GO:0044267; GO:0045814; GO:0051290; GO:0060968; GO:0098792	NM_003533; ENST00000616365; BC066884; BC067493; BC069305; OTTHUMT00000043452	GO:0000228; GO:0000786; GO:0000788; GO:0005576; GO:0005634; GO:0005654; GO:0016020; GO:0043234; GO:0070062; GO:0005694	NM_003533; ENST00000616365; BC066884; BC067493; BC069305; OTTHUMT00000043452	GO:0003677; GO:0005515; GO:0042393; GO:0046982				main	Coding	Hs01924130_s1
TC0100018348.hg.1	4.84	6.3	-2.74	2.74	1	1	4.84	6.3	CNIH3	cornichon family AMPA receptor auxiliary protein 3	chr1	+	NonCoding	224434301	224521972	ENST00000483512; ENST00000496372; ENST00000498126; OTTHUMT00000092005; OTTHUMT00000092008; OTTHUMT00000092009; CNIH3.vbAug10; uc057pvf.1; uc057pvg.1; uc057pvh.1; NONHSAT009800; NONHSAT009802; NONHSAT009803; NONHSAT009804; NONHSAT009806; NONHSAT009807; NONHSAT009808; NONHSAT009809; NONHSAT009810; NONHSAT139933	ENSEMBL; Havana transcript; Ace View; UCSC Genes; lncRNAWiki; NONCODE	ENST00000483512; ENST00000496372; ENST00000498126; OTTHUMT00000092005; OTTHUMT00000092008; OTTHUMT00000092009	GO:0006888; GO:0018279; GO:0035249; GO:0035556; GO:0042391; GO:0043687; GO:0044267; GO:0048208; GO:0061024; GO:2000311	ENST00000483512; ENST00000496372; ENST00000498126; OTTHUMT00000092005; OTTHUMT00000092008; OTTHUMT00000092009	GO:0000139; GO:0005789; GO:0012507; GO:0030054; GO:0032281; GO:0033116; GO:0043198; GO:0045211; GO:0005886; GO:0016020; GO:0016021; GO:0045202	ENST00000483512; ENST00000496372; ENST00000498126; OTTHUMT00000092005; OTTHUMT00000092008; OTTHUMT00000092009	GO:0016247				main	NonCoding	Hs01373708_m1
TC0200010577.hg.1	3.96	5.42	-2.74	2.74	1	1	3.96	5.42	ADAM23	ADAM metallopeptidase domain 23	chr2	+	Multiple_Complex	206443539	206621131	NM_003812; ENST00000264377; ENST00000374415; ENST00000444281; BC132763; BC132765; OTTHUMT00000256431; OTTHUMT00000336801; OTTHUMT00000336802; CCDS2369.1; hsa_circ_0057932; hsa_circ_0057933; hsa_circ_0057934; hsa_circ_0057935; hsa_circ_0057936; hsa_circ_0057937; hsa_circ_0057938; hsa_circ_0057939; hsa_circ_0057940; uc002vbq.6; uc061rtv.1; uc061rtw.1; NONHSAT076562	RefSeq; ENSEMBL; GenBank; Havana transcript; ccdsGene; circbase; UCSC Genes; lncRNAWiki; NONCODE	NM_003812; ENST00000264377; ENST00000374415; ENST00000444281; BC132763; BC132765; OTTHUMT00000256431; OTTHUMT00000336801; OTTHUMT00000336802	GO:0006508; GO:0007155; GO:0007417; GO:0007229	NM_003812; ENST00000264377; ENST00000374415; ENST00000444281; BC132763; BC132765; OTTHUMT00000256431; OTTHUMT00000336801; OTTHUMT00000336802	GO:0005576; GO:0005886; GO:0005887; GO:0016020; GO:0016021	NM_003812; ENST00000264377; ENST00000374415; ENST00000444281; BC132763; BC132765; OTTHUMT00000256431; OTTHUMT00000336801; OTTHUMT00000336802	GO:0004222; GO:0005178; GO:0005515; GO:0008237; GO:0008270				main	Multiple_Complex	Hs01046787_m1
TC0300013977.hg.1	9.27	10.72	-2.74	2.74	1	1	9.27	10.72	C3orf62	chromosome 3 open reading frame 62	chr3	-	Multiple_Complex	49268597	49277075	NM_198562; ENST00000424960; ENST00000479673; BC053629; BC061697; OTTHUMT00000345991; OTTHUMT00000346082; CCDS2792.1; uc062jsi.1; uc062jsk.1	RefSeq; ENSEMBL; GenBank; Havana transcript; ccdsGene; UCSC Genes					NM_198562; ENST00000424960; ENST00000479673; BC053629; BC061697; OTTHUMT00000345991; OTTHUMT00000346082	GO:0005515				main	Multiple_Complex	Hs00909000_m1
TC1500008955.hg.1	5.83	7.29	-2.74	2.74	1	1	5.83	7.29	FMN1	formin 1	chr15	-	Multiple_Complex	32765544	33194733	NM_001103184; NM_001277313; NM_001277314; ENST00000320930; ENST00000334528; ENST00000558197; ENST00000558628; ENST00000558711; ENST00000558882; ENST00000559047; ENST00000559150; ENST00000559610; ENST00000560317; ENST00000561249; ENST00000616417; OTTHUMT00000417305; OTTHUMT00000417413; OTTHUMT00000417414; OTTHUMT00000417415; OTTHUMT00000417416; OTTHUMT00000417417; OTTHUMT00000417418; OTTHUMT000004…	RefSeq; ENSEMBL; Havana transcript; GenBank; ccdsGene; Ace View; circbase; UCSC Genes; Guo; lncRNAWiki; NONCODE			NM_001103184; NM_001277313; NM_001277314; ENST00000320930; ENST00000334528; ENST00000558197; ENST00000558628; ENST00000558711; ENST00000558882; ENST00000559047; ENST00000559150; ENST00000559610; ENST00000560317; ENST00000561249; ENST00000616417; OTTHUMT00000417305; OTTHUMT00000417413; OTTHUMT00000417414; OTTHUMT00000417415; OTTHUMT00000417416; OTTHUMT00000417417; OTTHUMT00000417418; OTTHUMT000004…	GO:0005634; GO:0005737; GO:0005884; GO:0005886; GO:0005912; GO:0015630; GO:0016020; GO:0030054	NM_001103184; NM_001277313; NM_001277314; ENST00000320930; ENST00000334528; ENST00000558197; ENST00000558628; ENST00000558711; ENST00000558882; ENST00000559047; ENST00000559150; ENST00000559610; ENST00000560317; ENST00000561249; ENST00000616417; OTTHUMT00000417305; OTTHUMT00000417413; OTTHUMT00000417414; OTTHUMT00000417415; OTTHUMT00000417416; OTTHUMT00000417417; OTTHUMT00000417418; OTTHUMT000004…	GO:0003779; GO:0008017; GO:0017124; GO:0005515				main	Multiple_Complex	Hs05010773_m1
TC1500009904.hg.1	11.22	12.67	-2.74	2.74	1	1	11.22	12.67	TLE3	transducin-like enhancer of split 3	chr15	-	Multiple_Complex	70047790	70098176	NM_001105192; NM_001282979; NM_001282980; NM_001282981; NM_001282982; NM_005078; NM_020908; ENST00000317509; ENST00000440567; ENST00000451782; ENST00000537387; ENST00000539550; ENST00000542329; ENST00000557815; ENST00000557907; ENST00000557919; ENST00000557984; ENST00000557997; ENST00000558201; ENST00000558379; ENST00000558939; ENST00000559048; ENST00000559191; ENST00000559574; ENST00000559608; E…	RefSeq; ENSEMBL; GenBank; Havana transcript; ccdsGene; circbase; Ace View; UCSC Genes; lncRNAWiki; NONCODE			NM_001105192; NM_001282979; NM_001282980; NM_001282981; NM_001282982; NM_005078; NM_020908; ENST00000317509; ENST00000440567; ENST00000451782; ENST00000537387; ENST00000539550; ENST00000542329; ENST00000557815; ENST00000557907; ENST00000557919; ENST00000557984; ENST00000557997; ENST00000558201; ENST00000558379; ENST00000558939; ENST00000559048; ENST00000559191; ENST00000559574; ENST00000559608; E…	GO:0005634; GO:0005654	NM_001105192; NM_001282979; NM_001282980; NM_001282981; NM_001282982; NM_005078; NM_020908; ENST00000317509; ENST00000440567; ENST00000451782; ENST00000537387; ENST00000539550; ENST00000542329; ENST00000557815; ENST00000557907; ENST00000557919; ENST00000557984; ENST00000557997; ENST00000558201; ENST00000558379; ENST00000558939; ENST00000559048; ENST00000559191; ENST00000559574; ENST00000559608; E…	GO:0005515				main	Multiple_Complex	Hs01032573_gH
TC2000007085.hg.1	6.33	4.88	2.74	2.74	1	1	6.33	4.88	COX4I2	cytochrome c oxidase subunit IV isoform 2 (lung)	chr20	+	Multiple_Complex	31637888	31645006	NM_032609; ENST00000376075; ENST00000490030; BC057779; OTTHUMT00000078548; OTTHUMT00000078549; CCDS13187.1; uc002wwj.2; uc061wcj.1	RefSeq; ENSEMBL; GenBank; Havana transcript; ccdsGene; UCSC Genes	NM_032609; ENST00000376075; ENST00000490030; BC057779; OTTHUMT00000078548; OTTHUMT00000078549	GO:0006091; GO:0006123; GO:0009060; GO:0045333; GO:0055114; GO:1902600	NM_032609; ENST00000376075; ENST00000490030; BC057779; OTTHUMT00000078548; OTTHUMT00000078549	GO:0005751; GO:0005739; GO:0005743; GO:0016020; GO:0031966; GO:0016021	NM_032609; ENST00000376075; ENST00000490030; BC057779; OTTHUMT00000078548; OTTHUMT00000078549	GO:0004129				main	Multiple_Complex	Hs01025455_m1
TC2000009886.hg.1	9.5	10.95	-2.74	2.74	1	1	9.5	10.95	PANK2	pantothenate kinase 2	chr20	+	NonCoding	3929222	3929882	ENST00000621891; OTTHUMT00000473449; uc061ven.1	ENSEMBL; Havana transcript; UCSC Genes	ENST00000621891; OTTHUMT00000473449	GO:0006766; GO:0006767; GO:0007286; GO:0009060; GO:0009108; GO:0015937; GO:0015939; GO:0016310; GO:0019217; GO:0044281; GO:0051881; GO:0070584; GO:0090207; GO:1904251	ENST00000621891; OTTHUMT00000473449	GO:0005737; GO:0005739; GO:0005758; GO:0005829	ENST00000621891; OTTHUMT00000473449	GO:0004594; GO:0005524; GO:0000166; GO:0016301; GO:0016740				main	NonCoding	TaqMan Probe Unavailable
TC0100009433.hg.1	8.71	7.26	2.73	2.73	1	1	8.71	7.26	LOC643355; RP11-88H9.2; toyfawbu	uncharacterized LOC643355; putative novel transcript; Transcript Identified by AceView	chr1	+	Multiple_Complex	111989770	111998842	NM_001270945; ENST00000428461.1; ENST00000438293.1; ENST00000442751.1; OTTHUMT00000033148; OTTHUMT00000033149; OTTHUMT00000470314; toyfawbu.bAug10; uc001ebw.5; uc057jjz.1; uc057jka.1; ENST00000428461; ENST00000438293; ENST00000442751; HG492437.1:1..975:ncRNA; HG492438.1:1..709:ncRNA; HG492439.1:1..3068:ncRNA; NONHSAT005218; NONHSAT005219; NONHSAT005220	RefSeq; lncRNAWiki; Havana transcript; Ace View; UCSC Genes; ENSEMBL; RNACentral; NONCODE										main	Multiple_Complex	Hs00930786_m1
TC0300012367.hg.1	6.53	7.98	-2.73	2.73	1	1	6.53	7.98	KIAA1257	KIAA1257	chr3	-	Multiple_Complex	128909866	129002690	NM_020741; ENST00000265068; ENST00000507225; ENST00000510149; ENST00000511438; ENST00000515659; BC031632; OTTHUMT00000358430; OTTHUMT00000358431; OTTHUMT00000358432; OTTHUMT00000358434; OTTHUMT00000358435; uc003elg.1; CCDS46905.1; uc003eli.5; uc003elj.5; uc062nph.1; uc062npk.1; uc062npl.1; uc062npm.1; ENST00000508239; ENST00000511204; NONHSAT091989; OTTHUMT00000369697; OTTHUMT00000369698	RefSeq; ENSEMBL; GenBank; Havana transcript; UCSC Genes; ccdsGene; lncRNAWiki; NONCODE										main	Multiple_Complex	Hs01070996_m1
TC0500012631.hg.1	8.16	6.71	2.73	2.73	1	1	8.16	6.71	EBF1	early B-cell factor 1	chr5	-	Multiple_Complex	158695902	159099780	NM_001290360; NM_024007; NM_182708; ENST00000313708; ENST00000380654; ENST00000517373; ENST00000518323; ENST00000518836; ENST00000519739; ENST00000519890; ENST00000522192; ENST00000523315; ENST00000523464; ENST00000622875; BC038805; BC041178; OTTHUMT00000252649; OTTHUMT00000374011; OTTHUMT00000374012; OTTHUMT00000374013; OTTHUMT00000374014; OTTHUMT00000374045; OTTHUMT00000374046; OTTHUMT000003740…	RefSeq; ENSEMBL; GenBank; Havana transcript; ccdsGene; circbase; UCSC Genes; lncRNAWiki; NONCODE	NM_001290360; NM_024007; NM_182708; ENST00000313708; ENST00000380654; ENST00000517373; ENST00000518323; ENST00000518836; ENST00000519739; ENST00000519890; ENST00000522192; ENST00000523315; ENST00000523464; ENST00000622875; BC038805; BC041178; OTTHUMT00000252649; OTTHUMT00000374011; OTTHUMT00000374012; OTTHUMT00000374013; OTTHUMT00000374014; OTTHUMT00000374045; OTTHUMT00000374046; OTTHUMT000003740…	GO:0006366; GO:0007275; GO:0045944; GO:0006351; GO:0006355; GO:0045893	NM_001290360; NM_024007; NM_182708; ENST00000313708; ENST00000380654; ENST00000517373; ENST00000518323; ENST00000518836; ENST00000519739; ENST00000519890; ENST00000522192; ENST00000523315; ENST00000523464; ENST00000622875; BC038805; BC041178; OTTHUMT00000252649; OTTHUMT00000374011; OTTHUMT00000374012; OTTHUMT00000374013; OTTHUMT00000374014; OTTHUMT00000374045; OTTHUMT00000374046; OTTHUMT000003740…	GO:0005634	NM_001290360; NM_024007; NM_182708; ENST00000313708; ENST00000380654; ENST00000517373; ENST00000518323; ENST00000518836; ENST00000519739; ENST00000519890; ENST00000522192; ENST00000523315; ENST00000523464; ENST00000622875; BC038805; BC041178; OTTHUMT00000252649; OTTHUMT00000374011; OTTHUMT00000374012; OTTHUMT00000374013; OTTHUMT00000374014; OTTHUMT00000374045; OTTHUMT00000374046; OTTHUMT000003740…	GO:0000978; GO:0001077; GO:0005515; GO:0046872; GO:0046983; GO:0070742; GO:0003677; GO:0003700				main	Multiple_Complex	Hs00395518_m1
TC1400010085.hg.1	13.04	11.59	2.73	2.73	1	1	13.04	11.59	TCL1A	T-cell leukemia/lymphoma 1A	chr14	-	Multiple_Complex	95709967	95714196	NM_001098725; NM_021966; NR_049726; ENST00000402399; ENST00000553467; ENST00000554012; ENST00000554119; ENST00000555202; ENST00000555886; ENST00000556156; ENST00000556450; ENST00000557043; BC003574; BC005831; BC014024; OTTHUMT00000413245; OTTHUMT00000413246; OTTHUMT00000413247; OTTHUMT00000413248; OTTHUMT00000413249; OTTHUMT00000413250; OTTHUMT00000413251; OTTHUMT00000413252; uc001yfc.4; CCDS9941…	RefSeq; ENSEMBL; GenBank; Havana transcript; UCSC Genes; ccdsGene; Ace View; lncRNAWiki; NONCODE	NM_001098725; NM_021966; NR_049726; ENST00000402399; ENST00000553467; ENST00000554012; ENST00000554119; ENST00000555202; ENST00000555886; ENST00000556156; ENST00000556450; ENST00000557043; BC003574; BC005831; BC014024; OTTHUMT00000413245; OTTHUMT00000413246; OTTHUMT00000413247; OTTHUMT00000413248; OTTHUMT00000413249; OTTHUMT00000413250; OTTHUMT00000413251; OTTHUMT00000413252; uc001yfc.4	GO:0007275; GO:0019827	NM_001098725; NM_021966; NR_049726; ENST00000402399; ENST00000553467; ENST00000554012; ENST00000554119; ENST00000555202; ENST00000555886; ENST00000556156; ENST00000556450; ENST00000557043; BC003574; BC005831; BC014024; OTTHUMT00000413245; OTTHUMT00000413246; OTTHUMT00000413247; OTTHUMT00000413248; OTTHUMT00000413249; OTTHUMT00000413250; OTTHUMT00000413251; OTTHUMT00000413252; uc001yfc.4	GO:0005783; GO:0005938; GO:0045120; GO:0005634; GO:0005737; GO:0043231	NM_001098725; NM_021966; NR_049726; ENST00000402399; ENST00000553467; ENST00000554012; ENST00000554119; ENST00000555202; ENST00000555886; ENST00000556156; ENST00000556450; ENST00000557043; BC003574; BC005831; BC014024; OTTHUMT00000413245; OTTHUMT00000413246; OTTHUMT00000413247; OTTHUMT00000413248; OTTHUMT00000413249; OTTHUMT00000413250; OTTHUMT00000413251; OTTHUMT00000413252; uc001yfc.4	GO:0005515				main	Multiple_Complex	Hs00951351_g1
TC0400012901.hg.1	5.94	7.39	-2.72	2.72	1	1	5.94	7.39	FBXL5	F-box and leucine-rich repeat protein 5	chr4	-	NonCoding	15659731	15681679	ENST00000514541; OTTHUMT00000359685; uc062vht.1; NONHSAT095626	ENSEMBL; Havana transcript; UCSC Genes; lncRNAWiki; NONCODE	ENST00000514541; OTTHUMT00000359685	GO:0016567; GO:0031146; GO:0055072; GO:1903364	ENST00000514541; OTTHUMT00000359685	GO:0000151; GO:0019005; GO:0048471; GO:0005737	ENST00000514541; OTTHUMT00000359685	GO:0004842; GO:0005506; GO:0005515; GO:0061630; GO:0046872				main	NonCoding	Hs05442439_m1
TC0600011948.hg.1	5.36	3.92	2.72	2.72	1	1	5.36	3.92	CYP39A1	cytochrome P450, family 39, subfamily A, polypeptide 1	chr6	-	Multiple_Complex	46549580	46652830	NM_001278738; NM_001278739; NM_016593; ENST00000275016; ENST00000476076; ENST00000480804; ENST00000489657; ENST00000619708; BC010358; OTTHUMT00000040787; OTTHUMT00000040788; OTTHUMT00000040789; OTTHUMT00000040790; CCDS4916.1; CCDS75465.1; CYP39A1.fAug10; hsa_circ_0076696; uc003oyf.3; uc010jzd.2; uc063oxf.1; uc063oxg.1; uc063oxh.1; chr6_46593154_46610035; NONHSAT113011; NONHSAT113012	RefSeq; ENSEMBL; GenBank; Havana transcript; ccdsGene; Ace View; circbase; UCSC Genes; Guo; lncRNAWiki; NONCODE	NM_001278738; NM_001278739; NM_016593; ENST00000275016; ENST00000476076; ENST00000480804; ENST00000489657; ENST00000619708; BC010358; OTTHUMT00000040787; OTTHUMT00000040788; OTTHUMT00000040789; OTTHUMT00000040790	GO:0006699; GO:0006707; GO:0006805; GO:0007586; GO:0008206; GO:0016125; GO:0030573; GO:0044281; GO:0055114; GO:0006629; GO:0008202; GO:0016042	NM_001278738; NM_001278739; NM_016593; ENST00000275016; ENST00000476076; ENST00000480804; ENST00000489657; ENST00000619708; BC010358; OTTHUMT00000040787; OTTHUMT00000040788; OTTHUMT00000040789; OTTHUMT00000040790	GO:0005789; GO:0043231; GO:0005783; GO:0016020; GO:0031090; GO:0016021	NM_001278738; NM_001278739; NM_016593; ENST00000275016; ENST00000476076; ENST00000480804; ENST00000489657; ENST00000619708; BC010358; OTTHUMT00000040787; OTTHUMT00000040788; OTTHUMT00000040789; OTTHUMT00000040790	GO:0005506; GO:0008387; GO:0008396; GO:0020037; GO:0033782; GO:0004497; GO:0016491; GO:0016705; GO:0046872				main	Multiple_Complex	Hs00900046_m1
TC0700010912.hg.1	7.16	5.72	2.72	2.72	1	1	7.16	5.72	MYL7	myosin light chain 7	chr7	-	Multiple_Complex	44138864	44141332	NM_021223; ENST00000223364; ENST00000431007; ENST00000431289; ENST00000434895; ENST00000446581; ENST00000447951; ENST00000457314; ENST00000457910; ENST00000458240; ENST00000476118; BC027915; OTTHUMT00000059446; OTTHUMT00000343120; OTTHUMT00000343121; OTTHUMT00000343122; OTTHUMT00000343123; OTTHUMT00000343124; OTTHUMT00000343125; OTTHUMT00000343126; OTTHUMT00000343127; OTTHUMT00000343128; CCDS5478…	RefSeq; ENSEMBL; GenBank; Havana transcript; ccdsGene; Ace View; UCSC Genes; lncRNAWiki; NONCODE	NM_021223; ENST00000223364; ENST00000431007; ENST00000431289; ENST00000434895; ENST00000446581; ENST00000447951; ENST00000457314; ENST00000457910; ENST00000458240; ENST00000476118; BC027915; OTTHUMT00000059446; OTTHUMT00000343120; OTTHUMT00000343121; OTTHUMT00000343122; OTTHUMT00000343123; OTTHUMT00000343124; OTTHUMT00000343125; OTTHUMT00000343126; OTTHUMT00000343127; OTTHUMT00000343128	GO:0006936	NM_021223; ENST00000223364; ENST00000431007; ENST00000431289; ENST00000434895; ENST00000446581; ENST00000447951; ENST00000457314; ENST00000457910; ENST00000458240; ENST00000476118; BC027915; OTTHUMT00000059446; OTTHUMT00000343120; OTTHUMT00000343121; OTTHUMT00000343122; OTTHUMT00000343123; OTTHUMT00000343124; OTTHUMT00000343125; OTTHUMT00000343126; OTTHUMT00000343127; OTTHUMT00000343128	GO:0005829; GO:0016459; GO:0031672; GO:0043197	NM_021223; ENST00000223364; ENST00000431007; ENST00000431289; ENST00000434895; ENST00000446581; ENST00000447951; ENST00000457314; ENST00000457910; ENST00000458240; ENST00000476118; BC027915; OTTHUMT00000059446; OTTHUMT00000343120; OTTHUMT00000343121; OTTHUMT00000343122; OTTHUMT00000343123; OTTHUMT00000343124; OTTHUMT00000343125; OTTHUMT00000343126; OTTHUMT00000343127; OTTHUMT00000343128	GO:0005509; GO:0005515; GO:0046872				main	Multiple_Complex	Hs01085598_g1
TC0X00009795.hg.1	18.55	17.11	2.72	2.72	1	1	18.55	17.11	ALAS2	5-aminolevulinate synthase 2	chrX	-	Multiple_Complex	55009055	55031064	NM_000032; NM_001037967; NM_001037968; ENST00000330807; ENST00000335854; ENST00000396198; ENST00000455688; ENST00000463868; ENST00000477869; ENST00000493869; ENST00000498636; BC030230; OTTHUMT00000056838; OTTHUMT00000056839; OTTHUMT00000056840; OTTHUMT00000056841; OTTHUMT00000056842; OTTHUMT00000056843; OTTHUMT00000056844; OTTHUMT00000331578; uc004dua.4; CCDS14366.1; CCDS35303.1; CCDS43960.1; hsa…	RefSeq; ENSEMBL; GenBank; Havana transcript; UCSC Genes; ccdsGene; circbase; lncRNAWiki; NONCODE			NM_000032; NM_001037967; NM_001037968; ENST00000330807; ENST00000335854; ENST00000396198; ENST00000455688; ENST00000463868; ENST00000477869; ENST00000493869; ENST00000498636; BC030230; OTTHUMT00000056838; OTTHUMT00000056839; OTTHUMT00000056840; OTTHUMT00000056841; OTTHUMT00000056842; OTTHUMT00000056843; OTTHUMT00000056844; OTTHUMT00000331578; uc004dua.4	GO:0005739; GO:0005743; GO:0005759	NM_000032; NM_001037967; NM_001037968; ENST00000330807; ENST00000335854; ENST00000396198; ENST00000455688; ENST00000463868; ENST00000477869; ENST00000493869; ENST00000498636; BC030230; OTTHUMT00000056838; OTTHUMT00000056839; OTTHUMT00000056840; OTTHUMT00000056841; OTTHUMT00000056842; OTTHUMT00000056843; OTTHUMT00000056844; OTTHUMT00000331578; uc004dua.4	GO:0003870; GO:0005515; GO:0016594; GO:0030170; GO:0050662; GO:0003824; GO:0016740; GO:0016746	NM_000032; NM_001037967; NM_001037968; ENST00000330807; ENST00000335854; ENST00000396198; ENST00000455688; ENST00000463868; ENST00000477869; ENST00000493869; ENST00000498636; BC030230; OTTHUMT00000056838; OTTHUMT00000056839; OTTHUMT00000056840; OTTHUMT00000056841; OTTHUMT00000056842; OTTHUMT00000056843; OTTHUMT00000056844; OTTHUMT00000331578; uc004dua.4	GenMAPP; HumanCyc	Heme_Biosynthesis; PWY-5189	main	Multiple_Complex	Hs01085700_g1
TC0800006591.hg.1	5.67	4.23	2.71	2.71	1	1	5.67	4.23	DEFB109P1B	defensin, beta 109, pseudogene 1B	chr8	+	Multiple_Complex	7312844	7319951	NR_003668; ENST00000382656; OTTHUMT00000315140; NR_024044_2; BC148781; DEFB109P1B.aAug10; NONHSAT124823; TCONS_l2_00028459	RefSeq; ENSEMBL; Havana transcript; GenBank; Ace View; lncRNAWiki; NONCODE; lncRNA Db	NR_003668; ENST00000382656; OTTHUMT00000315140	GO:0006952; GO:0042742	NR_003668; ENST00000382656; OTTHUMT00000315140	GO:0005576						main	Multiple_Complex	Hs02760065_g1
TC0X00006725.hg.1	3.77	5.21	-2.71	2.71	1	1	3.77	5.21	PPEF1	protein phosphatase, EF-hand calcium binding domain 1	chrX	+	Multiple_Complex	18675909	18827921	NM_006240; NM_152224; NM_152226; ENST00000349874; ENST00000361511; ENST00000379962; ENST00000470157; ENST00000471570; ENST00000472826; ENST00000486029; ENST00000496075; ENST00000496616; BC036026; OTTHUMT00000055953; OTTHUMT00000055954; OTTHUMT00000055955; OTTHUMT00000055956; OTTHUMT00000355050; OTTHUMT00000355051; OTTHUMT00000355052; OTTHUMT00000355053; CCDS14188.1; CCDS43920.1; PPEF1.eAug10; PPE…	RefSeq; ENSEMBL; GenBank; Havana transcript; ccdsGene; Ace View; UCSC Genes; lncRNAWiki; NONCODE	NM_006240; NM_152224; NM_152226; ENST00000349874; ENST00000361511; ENST00000379962; ENST00000470157; ENST00000471570; ENST00000472826; ENST00000486029; ENST00000496075; ENST00000496616; BC036026; OTTHUMT00000055953; OTTHUMT00000055954; OTTHUMT00000055955; OTTHUMT00000055956; OTTHUMT00000355050; OTTHUMT00000355051; OTTHUMT00000355052; OTTHUMT00000355053	GO:0006470; GO:0007603; GO:0016056; GO:0022400; GO:0050906; GO:0008152; GO:0016311	NM_006240; NM_152224; NM_152226; ENST00000349874; ENST00000361511; ENST00000379962; ENST00000470157; ENST00000471570; ENST00000472826; ENST00000486029; ENST00000496075; ENST00000496616; BC036026; OTTHUMT00000055953; OTTHUMT00000055954; OTTHUMT00000055955; OTTHUMT00000055956; OTTHUMT00000355050; OTTHUMT00000355051; OTTHUMT00000355052; OTTHUMT00000355053	GO:0005829	NM_006240; NM_152224; NM_152226; ENST00000349874; ENST00000361511; ENST00000379962; ENST00000470157; ENST00000471570; ENST00000472826; ENST00000486029; ENST00000496075; ENST00000496616; BC036026; OTTHUMT00000055953; OTTHUMT00000055954; OTTHUMT00000055955; OTTHUMT00000055956; OTTHUMT00000355050; OTTHUMT00000355051; OTTHUMT00000355052; OTTHUMT00000355053	GO:0004722; GO:0005506; GO:0005509; GO:0005515; GO:0030145; GO:0004721; GO:0016787; GO:0046872				main	Multiple_Complex	Hs00943155_m1
TC1500007866.hg.1	9.91	11.35	-2.71	2.71	1	1	9.91	11.35	PPCDC	phosphopantothenoylcysteine decarboxylase	chr15	+	Multiple_Complex	75023555	75117462	NM_001301101; NM_001301102; NM_001301103; NM_001301104; NM_001301105; NM_021823; NR_125369; ENST00000342932; ENST00000562095; ENST00000562192; ENST00000563298; ENST00000563393; ENST00000564923; ENST00000564953; ENST00000567336; ENST00000568207; ENST00000568649; ENST00000569562; BC014409; OTTHUMT00000286416; OTTHUMT00000419954; OTTHUMT00000419955; OTTHUMT00000419956; OTTHUMT00000419957; OTTHUMT000…	RefSeq; ENSEMBL; GenBank; Havana transcript; ccdsGene; circbase; UCSC Genes; lncRNAWiki; NONCODE	NM_001301101; NM_001301102; NM_001301103; NM_001301104; NM_001301105; NM_021823; NR_125369; ENST00000342932; ENST00000562095; ENST00000562192; ENST00000563298; ENST00000563393; ENST00000564923; ENST00000564953; ENST00000567336; ENST00000568207; ENST00000568649; ENST00000569562; BC014409; OTTHUMT00000286416; OTTHUMT00000419954; OTTHUMT00000419955; OTTHUMT00000419956; OTTHUMT00000419957; OTTHUMT000…	GO:0006766; GO:0006767; GO:0009108; GO:0015937; GO:0015939; GO:0044281; GO:0008152	NM_001301101; NM_001301102; NM_001301103; NM_001301104; NM_001301105; NM_021823; NR_125369; ENST00000342932; ENST00000562095; ENST00000562192; ENST00000563298; ENST00000563393; ENST00000564923; ENST00000564953; ENST00000567336; ENST00000568207; ENST00000568649; ENST00000569562; BC014409; OTTHUMT00000286416; OTTHUMT00000419954; OTTHUMT00000419955; OTTHUMT00000419956; OTTHUMT00000419957; OTTHUMT000…	GO:0005829	NM_001301101; NM_001301102; NM_001301103; NM_001301104; NM_001301105; NM_021823; NR_125369; ENST00000342932; ENST00000562095; ENST00000562192; ENST00000563298; ENST00000563393; ENST00000564923; ENST00000564953; ENST00000567336; ENST00000568207; ENST00000568649; ENST00000569562; BC014409; OTTHUMT00000286416; OTTHUMT00000419954; OTTHUMT00000419955; OTTHUMT00000419956; OTTHUMT00000419957; OTTHUMT000…	GO:0004633; GO:0005515; GO:0003824; GO:0016829; GO:0016831				main	Multiple_Complex	Hs01041567_g1
TC2000007820.hg.1	8.86	10.3	-2.71	2.71	1	1	8.86	10.3	CASS4	Cas scaffolding protein family member 4	chr20	+	Multiple_Complex	56412112	56460387	NM_001164114; NM_001164115; NM_001164116; NM_020356; ENST00000360314; ENST00000434344; ENST00000497244; BC027951; OTTHUMT00000079789; OTTHUMT00000079790; OTTHUMT00000079791; CASS4.bAug10; CASS4.cAug10; CASS4.eAug10; CCDS33492.1; CCDS54475.1; hsa_circ_0060952; uc002xxp.3; uc010gio.3; uc061xwq.1	RefSeq; ENSEMBL; GenBank; Havana transcript; Ace View; ccdsGene; circbase; UCSC Genes	NM_001164114; NM_001164115; NM_001164116; NM_020356; ENST00000360314; ENST00000434344; ENST00000497244; BC027951; OTTHUMT00000079789; OTTHUMT00000079790; OTTHUMT00000079791	GO:0000160; GO:0007155; GO:0023014; GO:0007165	NM_001164114; NM_001164115; NM_001164116; NM_020356; ENST00000360314; ENST00000434344; ENST00000497244; BC027951; OTTHUMT00000079789; OTTHUMT00000079790; OTTHUMT00000079791	GO:0005737; GO:0005856; GO:0005925; GO:0030054; GO:0005622; GO:0016020	NM_001164114; NM_001164115; NM_001164116; NM_020356; ENST00000360314; ENST00000434344; ENST00000497244; BC027951; OTTHUMT00000079789; OTTHUMT00000079790; OTTHUMT00000079791	GO:0000155; GO:0005515				main	Multiple_Complex	Hs00220503_m1
TSUnmapped00000243.hg.1	9.65	11.09	-2.71	2.71	1	1	9.65	11.09	MANSC1	MANSC domain containing 1			Coding			ENST00000626912	ENSEMBL			ENST00000626912	GO:0016021; GO:0016020						main->unmapped	Coding
TC0400008318.hg.1	12.11	13.55	-2.7	2.7	1	1	12.11	13.55	TET2	tet methylcytosine dioxygenase 2	chr4	+	Multiple_Complex	105145875	105279816	NM_001127208; NM_017628; ENST00000265149; ENST00000305737; ENST00000380013; ENST00000394764; ENST00000413648; ENST00000504042; ENST00000505801; ENST00000513237; ENST00000514870; ENST00000540549; OTTHUMT00000253951; OTTHUMT00000253952; OTTHUMT00000363308; OTTHUMT00000363309; OTTHUMT00000363310; OTTHUMT00000363311; OTTHUMT00000363312; OTTHUMT00000363313; uc021xqk.1; CCDS3666.1; CCDS47120.1; hsa_cir…	RefSeq; ENSEMBL; Havana transcript; UCSC Genes; ccdsGene; circbase; Ace View; Guo; lncRNAWiki; NONCODE					NM_001127208; NM_017628; ENST00000265149; ENST00000305737; ENST00000380013; ENST00000394764; ENST00000413648; ENST00000504042; ENST00000505801; ENST00000513237; ENST00000514870; ENST00000540549; OTTHUMT00000253951; OTTHUMT00000253952; OTTHUMT00000363308; OTTHUMT00000363309; OTTHUMT00000363310; OTTHUMT00000363311; OTTHUMT00000363312; OTTHUMT00000363313; uc021xqk.1	GO:0003677; GO:0005515; GO:0008198; GO:0008270; GO:0070579; GO:0016491; GO:0016706; GO:0046872; GO:0051213				main	Multiple_Complex	Hs00289469_m1
TC1100010495.hg.1	9.63	11.07	-2.7	2.7	1	1	9.63	11.07	LMO2	LIM domain only 2 (rhombotin-like 1)	chr11	-	Multiple_Complex	33858576	33892289	NM_001142315; NM_001142316; NM_005574; ENST00000257818; ENST00000395833; ENST00000411482; ENST00000464025; ENST00000465614; ENST00000493667; BC034041; BC035607; BC042426; BC073973; OTTHUMT00000347776; OTTHUMT00000347777; OTTHUMT00000347778; OTTHUMT00000347779; OTTHUMT00000347780; OTTHUMT00000347781; CCDS44567.1; CCDS7888.2; uc001mvc.5; uc001mve.5; uc010rem.3; uc058agf.1; uc058agh.1; uc058agi.1; N…	RefSeq; ENSEMBL; GenBank; Havana transcript; ccdsGene; UCSC Genes; lncRNAWiki; NONCODE	NM_001142315; NM_001142316; NM_005574; ENST00000257818; ENST00000395833; ENST00000411482; ENST00000464025; ENST00000465614; ENST00000493667; BC034041; BC035607; BC042426; BC073973; OTTHUMT00000347776; OTTHUMT00000347777; OTTHUMT00000347778; OTTHUMT00000347779; OTTHUMT00000347780; OTTHUMT00000347781	GO:0007275; GO:0035162; GO:0042789; GO:0045944; GO:0097067; GO:0045647	NM_001142315; NM_001142316; NM_005574; ENST00000257818; ENST00000395833; ENST00000411482; ENST00000464025; ENST00000465614; ENST00000493667; BC034041; BC035607; BC042426; BC073973; OTTHUMT00000347776; OTTHUMT00000347777; OTTHUMT00000347778; OTTHUMT00000347779; OTTHUMT00000347780; OTTHUMT00000347781	GO:0005634; GO:0005667; GO:0043234	NM_001142315; NM_001142316; NM_005574; ENST00000257818; ENST00000395833; ENST00000411482; ENST00000464025; ENST00000465614; ENST00000493667; BC034041; BC035607; BC042426; BC073973; OTTHUMT00000347776; OTTHUMT00000347777; OTTHUMT00000347778; OTTHUMT00000347779; OTTHUMT00000347780; OTTHUMT00000347781	GO:0000977; GO:0000981; GO:0001102; GO:0001190; GO:0001228; GO:0003682; GO:0005515; GO:0008270; GO:0043425; GO:0048037; GO:0070888; GO:0046872; GO:0003677				main	Multiple_Complex	Hs00277106_m1
TC1800009086.hg.1	8.13	9.56	-2.7	2.7	1	1	8.13	9.56	ZNF516	zinc finger protein 516	chr18	-	Multiple_Complex	76357682	76495190	NM_014643; ENST00000443185; ENST00000532857; ENST00000542818; ENST00000543743; ENST00000617840; OTTHUMT00000387362; OTTHUMT00000387363; OTTHUMT00000388604; OTTHUMT00000397852; OTTHUMT00000397853; CCDS74234.1; hsa_circ_0003479; hsa_circ_0005140; hsa_circ_0007725; hsa_circ_0008699; uc032hhr.2; uc060qes.1; uc060qet.1; uc060qeu.1; uc060qex.1; ZNF516.aAug10; ZNF516.cAug10; chr18_74153200_74155167; NON…	RefSeq; ENSEMBL; Havana transcript; ccdsGene; circbase; UCSC Genes; Ace View; Guo; lncRNAWiki; NONCODE	NM_014643; ENST00000443185; ENST00000532857; ENST00000542818; ENST00000543743; ENST00000617840; OTTHUMT00000387362; OTTHUMT00000387363; OTTHUMT00000388604; OTTHUMT00000397852; OTTHUMT00000397853	GO:0006366; GO:0007165; GO:0007275; GO:0009409; GO:0045893; GO:0050873; GO:0060612; GO:0006351; GO:0006355	NM_014643; ENST00000443185; ENST00000532857; ENST00000542818; ENST00000543743; ENST00000617840; OTTHUMT00000387362; OTTHUMT00000387363; OTTHUMT00000388604; OTTHUMT00000397852; OTTHUMT00000397853	GO:0005634	NM_014643; ENST00000443185; ENST00000532857; ENST00000542818; ENST00000543743; ENST00000617840; OTTHUMT00000387362; OTTHUMT00000387363; OTTHUMT00000388604; OTTHUMT00000397852; OTTHUMT00000397853	GO:0000987; GO:0003700; GO:0033613; GO:0043565; GO:0044212; GO:0046872; GO:0003676; GO:0003677				main	Multiple_Complex	Hs01055829_m1
TC1900011743.hg.1	8.88	10.32	-2.7	2.7	1	1	8.88	10.32	TMEM91	transmembrane protein 91	chr19	+	Multiple_Complex	41350911	41384083	NM_001042595; NM_001098821; NM_001098822; NM_001098823; NM_001098824; NM_001098825; ENST00000342187; ENST00000356385; ENST00000392002; ENST00000413014; ENST00000436170; ENST00000447302; ENST00000535712; ENST00000537354; ENST00000539627; ENST00000542945; ENST00000544232; ENST00000546050; ENST00000546362; ENST00000604123; BC063705; OTTHUMT00000398300; OTTHUMT00000398301; OTTHUMT00000398302; OTTHUMT…	RefSeq; ENSEMBL; GenBank; Havana transcript; ccdsGene; circbase; Ace View; UCSC Genes	NM_001042595; NM_001098821; NM_001098822; NM_001098823; NM_001098824; NM_001098825; ENST00000342187; ENST00000356385; ENST00000392002; ENST00000413014; ENST00000436170; ENST00000447302; ENST00000535712; ENST00000537354; ENST00000539627; ENST00000542945; ENST00000544232; ENST00000546050; ENST00000546362; ENST00000604123; BC063705; OTTHUMT00000398300; OTTHUMT00000398301; OTTHUMT00000398302; OTTHUMT…	GO:0002244; GO:0009607; GO:0008150	NM_001042595; NM_001098821; NM_001098822; NM_001098823; NM_001098824; NM_001098825; ENST00000342187; ENST00000356385; ENST00000392002; ENST00000413014; ENST00000436170; ENST00000447302; ENST00000535712; ENST00000537354; ENST00000539627; ENST00000542945; ENST00000544232; ENST00000546050; ENST00000546362; ENST00000604123; BC063705; OTTHUMT00000398300; OTTHUMT00000398301; OTTHUMT00000398302; OTTHUMT…	GO:0016021; GO:0005575; GO:0016020	NM_001042595; NM_001098821; NM_001098822; NM_001098823; NM_001098824; NM_001098825; ENST00000342187; ENST00000356385; ENST00000392002; ENST00000413014; ENST00000436170; ENST00000447302; ENST00000535712; ENST00000537354; ENST00000539627; ENST00000542945; ENST00000544232; ENST00000546050; ENST00000546362; ENST00000604123; BC063705; OTTHUMT00000398300; OTTHUMT00000398301; OTTHUMT00000398302; OTTHUMT…	GO:0003674				main	Multiple_Complex	Hs01584132_m1
TC0100013651.hg.1	8.9	10.32	-2.69	2.69	1	1	8.9	10.32	PHC2; MIR3605	polyhomeotic homolog 2 (Drosophila); microRNA 3605	chr1	-	Multiple_Complex	33323623	33431052	NM_004427; NM_198040; NR_037400; ENST00000257118; ENST00000373418; ENST00000373422; ENST00000431992; ENST00000459964; ENST00000467894; ENST00000468406; ENST00000473158; ENST00000484692; ENST00000485928; ENST00000486897; ENST00000493483; BC130630; BC144121; OTTHUMT00000011895; OTTHUMT00000011896; OTTHUMT00000011897; OTTHUMT00000011898; OTTHUMT00000011899; OTTHUMT00000011900; OTTHUMT00000011901; OT…	RefSeq; ENSEMBL; GenBank; Havana transcript; UCSC Genes; ccdsGene; circbase; RNACentral; lncRNAWiki; NONCODE	NM_004427; NM_198040; ENST00000257118; ENST00000373418; ENST00000373422; ENST00000431992; ENST00000459964; ENST00000467894; ENST00000468406; ENST00000473158; ENST00000484692; ENST00000485928; ENST00000486897; ENST00000493483; BC130630; BC144121; OTTHUMT00000011895; OTTHUMT00000011896; OTTHUMT00000011897; OTTHUMT00000011898; OTTHUMT00000011899; OTTHUMT00000011900; OTTHUMT00000011901; OTTHUMT000000…	GO:0007275; GO:0007283; GO:0016925; GO:0043687; GO:0044267	NM_004427; NM_198040; ENST00000257118; ENST00000373418; ENST00000373422; ENST00000431992; ENST00000459964; ENST00000467894; ENST00000468406; ENST00000473158; ENST00000484692; ENST00000485928; ENST00000486897; ENST00000493483; BC130630; BC144121; OTTHUMT00000011895; OTTHUMT00000011896; OTTHUMT00000011897; OTTHUMT00000011898; OTTHUMT00000011899; OTTHUMT00000011900; OTTHUMT00000011901; OTTHUMT000000…	GO:0000792; GO:0005634; GO:0005654; GO:0031519; GO:0035102	NM_004427; NM_198040; ENST00000257118; ENST00000373418; ENST00000373422; ENST00000431992; ENST00000459964; ENST00000467894; ENST00000468406; ENST00000473158; ENST00000484692; ENST00000485928; ENST00000486897; ENST00000493483; BC130630; BC144121; OTTHUMT00000011895; OTTHUMT00000011896; OTTHUMT00000011897; OTTHUMT00000011898; OTTHUMT00000011899; OTTHUMT00000011900; OTTHUMT00000011901; OTTHUMT000000…	GO:0003677; GO:0005515; GO:0008270; GO:0042802; GO:0046872				main	Multiple_Complex	Hs01083419_m1
TC1200012080.hg.1	9.29	10.72	-2.69	2.69	1	1	9.29	10.72	TESC	tescalcin	chr12	-	Multiple_Complex	117038923	117099479	NM_001168325; NM_017899; NR_031766; ENST00000335209; ENST00000462502; ENST00000470612; ENST00000482176; ENST00000535198; ENST00000541210; ENST00000549210; ENST00000552139; BC015221; OTTHUMT00000291363; OTTHUMT00000291364; OTTHUMT00000291365; OTTHUMT00000291366; OTTHUMT00000291367; OTTHUMT00000404404; OTTHUMT00000404405; CCDS53835.1; CCDS9183.3; hsa_circ_0028614; hsa_circ_0028615; hsa_circ_0028616…	RefSeq; ENSEMBL; GenBank; Havana transcript; ccdsGene; circbase; Ace View; UCSC Genes; lncRNAWiki; NONCODE			NM_001168325; NM_017899; NR_031766; ENST00000335209; ENST00000462502; ENST00000470612; ENST00000482176; ENST00000535198; ENST00000541210; ENST00000549210; ENST00000552139; BC015221; OTTHUMT00000291363; OTTHUMT00000291364; OTTHUMT00000291365; OTTHUMT00000291366; OTTHUMT00000291367; OTTHUMT00000404404; OTTHUMT00000404405	GO:0001726; GO:0005634; GO:0005737; GO:0005886; GO:0030027; GO:0032587; GO:0016020; GO:0042995; GO:0005654	NM_001168325; NM_017899; NR_031766; ENST00000335209; ENST00000462502; ENST00000470612; ENST00000482176; ENST00000535198; ENST00000541210; ENST00000549210; ENST00000552139; BC015221; OTTHUMT00000291363; OTTHUMT00000291364; OTTHUMT00000291365; OTTHUMT00000291366; OTTHUMT00000291367; OTTHUMT00000404404; OTTHUMT00000404405	GO:0000287; GO:0004860; GO:0005509; GO:0005515; GO:0019212; GO:0042803; GO:0046872				main	Multiple_Complex	Hs01091150_m1
TC2000009970.hg.1	13.21	14.63	-2.69	2.69	1	1	13.21	14.63	SIRPB1	signal-regulatory protein beta 1	chr20	-	Multiple_Complex	1563521	1620061	NM_001083910; NM_001135844; NM_006065; ENST00000262929; ENST00000279477; ENST00000381596; ENST00000381603; ENST00000381605; ENST00000562014; ENST00000563840; ENST00000565076; ENST00000565087; ENST00000565230; ENST00000565775; ENST00000566055; ENST00000568365; ENST00000569387; ENST00000569629; OTTHUMT00000077555; OTTHUMT00000077556; OTTHUMT00000077557; OTTHUMT00000077558; OTTHUMT00000421353; OTTHU…	RefSeq; ENSEMBL; Havana transcript; GenBank; ccdsGene; Ace View; UCSC Genes	NM_001083910; NM_001135844; NM_006065; ENST00000262929; ENST00000279477; ENST00000381596; ENST00000381603; ENST00000381605; ENST00000562014; ENST00000563840; ENST00000565076; ENST00000565087; ENST00000565230; ENST00000565775; ENST00000566055; ENST00000568365; ENST00000569387; ENST00000569629; OTTHUMT00000077555; OTTHUMT00000077556; OTTHUMT00000077557; OTTHUMT00000077558; OTTHUMT00000421353; OTTHU…	GO:0007165; GO:0007166; GO:0045087	NM_001083910; NM_001135844; NM_006065; ENST00000262929; ENST00000279477; ENST00000381596; ENST00000381603; ENST00000381605; ENST00000562014; ENST00000563840; ENST00000565076; ENST00000565087; ENST00000565230; ENST00000565775; ENST00000566055; ENST00000568365; ENST00000569387; ENST00000569629; OTTHUMT00000077555; OTTHUMT00000077556; OTTHUMT00000077557; OTTHUMT00000077558; OTTHUMT00000421353; OTTHU…	GO:0005886; GO:0005887; GO:0016021; GO:0070062; GO:0016020	NM_001083910; NM_001135844; NM_006065; ENST00000262929; ENST00000279477; ENST00000381596; ENST00000381603; ENST00000381605; ENST00000562014; ENST00000563840; ENST00000565076; ENST00000565087; ENST00000565230; ENST00000565775; ENST00000566055; ENST00000568365; ENST00000569387; ENST00000569629; OTTHUMT00000077555; OTTHUMT00000077556; OTTHUMT00000077557; OTTHUMT00000077558; OTTHUMT00000421353; OTTHU…	GO:0005515				main	Multiple_Complex	Hs01092173_m1
TSUnmapped00000538.hg.1	7.49	8.92	-2.69	2.69	1	1	7.49	8.92	DGKD	diacylglycerol kinase, delta 130kDa			NonCoding			ENST00000630627	ENSEMBL	ENST00000630627	GO:0006897; GO:0007165; GO:0007173; GO:0007205; GO:0007275; GO:0007596; GO:0010033; GO:0015031; GO:0016049; GO:0016310; GO:0019932; GO:0030168; GO:0046339; GO:0051260; GO:0006810; GO:0035556	ENST00000630627	GO:0005737; GO:0005886; GO:0016023; GO:0016020	ENST00000630627	GO:0004143; GO:0005515; GO:0005524; GO:0019992; GO:0042803; GO:0046872; GO:0046982; GO:0000166; GO:0016301; GO:0016740				main->unmapped	NonCoding
TC0600008146.hg.1	11.69	13.11	-2.68	2.68	1	1	11.69	13.11	RUNX2	runt-related transcription factor 2	chr6	+	Multiple_Complex	45328157	45664349	NM_001015051; NM_001024630; NM_001278478; NR_103532; NR_103533; ENST00000359524; ENST00000371432; ENST00000371436; ENST00000371438; ENST00000465038; ENST00000473041; ENST00000478660; ENST00000483243; ENST00000483377; ENST00000576263; ENST00000625924; OTTHUMT00000040753; OTTHUMT00000040754; OTTHUMT00000040755; OTTHUMT00000040756; OTTHUMT00000040757; OTTHUMT00000040758; OTTHUMT00000040759; OTTHUMT0…	RefSeq; ENSEMBL; Havana transcript; UCSC Genes; GenBank; ccdsGene; circbase; Ace View; Guo; lncRNAWiki; NONCODE			NM_001015051; NM_001024630; NM_001278478; NR_103532; NR_103533; ENST00000359524; ENST00000371432; ENST00000371436; ENST00000371438; ENST00000465038; ENST00000473041; ENST00000478660; ENST00000483243; ENST00000483377; ENST00000576263; ENST00000625924; OTTHUMT00000040753; OTTHUMT00000040754; OTTHUMT00000040755; OTTHUMT00000040756; OTTHUMT00000040757; OTTHUMT00000040758; OTTHUMT00000040759; OTTHUMT0…	GO:0000790; GO:0005654; GO:0005667; GO:0005737; GO:0005634			NM_001015051; NM_001024630; NM_001278478; NR_103532; NR_103533; ENST00000359524; ENST00000371432; ENST00000371436; ENST00000371438; ENST00000465038; ENST00000473041; ENST00000478660; ENST00000483243; ENST00000483377; ENST00000576263; ENST00000625924; OTTHUMT00000040753; OTTHUMT00000040754; OTTHUMT00000040755; OTTHUMT00000040756; OTTHUMT00000040757; OTTHUMT00000040758; OTTHUMT00000040759; OTTHUMT0…	GenMAPP	TGF_Beta_Signaling_Pathway	main	Multiple_Complex	Hs01047975_m1
TC1000008400.hg.1	10.91	9.49	2.68	2.68	1	1	10.91	9.49	IFIT1	interferon-induced protein with tetratricopeptide repeats 1	chr10	+	Coding	89392546	89406487	NM_001270927; NM_001270928; NM_001270929; NM_001270930; NM_001548; ENST00000371804; ENST00000546318; BC007091; OTTHUMT00000049302; CCDS31243.1; CCDS59220.1; uc001kgi.5; uc031pwq.2	RefSeq; ENSEMBL; GenBank; Havana transcript; ccdsGene; UCSC Genes	NM_001270927; NM_001270928; NM_001270929; NM_001270930; NM_001548; ENST00000371804; ENST00000546318; BC007091; OTTHUMT00000049302	GO:0009615; GO:0019060; GO:0019221; GO:0032091; GO:0045070; GO:0045071; GO:0050689; GO:0051097; GO:0051607; GO:0060337; GO:0071357; GO:0071360; GO:0002376; GO:0016032; GO:0045087; GO:0050688	NM_001270927; NM_001270928; NM_001270929; NM_001270930; NM_001548; ENST00000371804; ENST00000546318; BC007091; OTTHUMT00000049302	GO:0005737; GO:0005829; GO:0043657	NM_001270927; NM_001270928; NM_001270929; NM_001270930; NM_001548; ENST00000371804; ENST00000546318; BC007091; OTTHUMT00000049302	GO:0003723; GO:0005515				main	Coding	Hs01911452_s1
TC1100006442.hg.1	6.19	7.61	-2.68	2.68	1	1	6.19	7.61	NLRP6	NLR family, pyrin domain containing 6	chr11	+	Multiple_Complex	278365	285388	NM_001276700; NM_138329; ENST00000312165; ENST00000527946; ENST00000534750; OTTHUMT00000239283; OTTHUMT00000385707; OTTHUMT00000385708; CCDS60680.1; CCDS7693.1; NLRP6.aAug10; uc010qvs.4; uc010qvt.4; uc057xdw.1; NONHSAT017215	RefSeq; ENSEMBL; Havana transcript; ccdsGene; Ace View; UCSC Genes; lncRNAWiki; NONCODE	NM_001276700; NM_138329; ENST00000312165; ENST00000527946; ENST00000534750; OTTHUMT00000239283; OTTHUMT00000385707; OTTHUMT00000385708	GO:0002862; GO:0006954; GO:0007186; GO:0009617; GO:0010506; GO:0034122; GO:0042060; GO:0043124; GO:0045087; GO:0050727; GO:0070255; GO:0070373; GO:0002376; GO:0043409; GO:0050777	NM_001276700; NM_138329; ENST00000312165; ENST00000527946; ENST00000534750; OTTHUMT00000239283; OTTHUMT00000385707; OTTHUMT00000385708	GO:0005886; GO:0031965; GO:0061702; GO:0005634; GO:0005737; GO:0016020	NM_001276700; NM_138329; ENST00000312165; ENST00000527946; ENST00000534750; OTTHUMT00000239283; OTTHUMT00000385707; OTTHUMT00000385708	GO:0005000; GO:0005524; GO:0000166				main	Multiple_Complex	Hs00373244_g1
TC1100011050.hg.1	8.07	6.65	2.68	2.68	1	1	8.07	6.65	FADS1; MIR1908	fatty acid desaturase 1; microRNA 1908	chr11	-	Multiple_Complex	61799625	61829318	NM_013402; NR_031729; ENST00000350997; ENST00000410394; ENST00000421879; ENST00000424501; ENST00000433932; ENST00000448607; ENST00000460649; ENST00000466716; ENST00000473263; ENST00000491310; ENST00000496123; ENST00000536991; ENST00000539419; ENST00000539999; ENST00000540767; ENST00000541683; ENST00000542506; ENST00000544309; ENST00000544696; ENST00000545245; ENST00000545405; ENST00000545986; BC0…	RefSeq; ENSEMBL; GenBank; Havana transcript; UCSC Genes; ccdsGene; Ace View; circbase; RNACentral; lncRNAWiki; NONCODE					NM_013402; ENST00000350997; ENST00000421879; ENST00000424501; ENST00000433932; ENST00000448607; ENST00000460649; ENST00000466716; ENST00000473263; ENST00000491310; ENST00000496123; ENST00000536991; ENST00000539419; ENST00000539999; ENST00000540767; ENST00000541683; ENST00000542506; ENST00000544309; ENST00000544696; ENST00000545245; ENST00000545405; ENST00000545986; BC007846; OTTHUMT00000347648; O…	GO:0000248; GO:0016491; GO:0016717				main	Multiple_Complex	Hs01096547_m1
TC2100007140.hg.1	9.61	11.04	-2.68	2.68	1	1	9.61	11.04	ETS2	v-ets avian erythroblastosis virus E26 oncogene homolog 2	chr21	+	Multiple_Complex	38805307	38824955	NM_001256295; NM_005239; ENST00000360214; ENST00000360938; ENST00000432278; ENST00000456966; BC017040; BC042954; OTTHUMT00000207544; OTTHUMT00000207545; OTTHUMT00000207546; OTTHUMT00000207547; CCDS13659.1; ETS2.cAug10; hsa_circ_0061705; hsa_circ_0061706; hsa_circ_0061707; hsa_circ_0061708; hsa_circ_0061709; uc002yxf.4; uc002yxg.5; uc062acp.1; uc062acq.1	RefSeq; ENSEMBL; GenBank; Havana transcript; ccdsGene; Ace View; circbase; UCSC Genes	NM_001256295; NM_005239; ENST00000360214; ENST00000360938; ENST00000432278; ENST00000456966; BC017040; BC042954; OTTHUMT00000207544; OTTHUMT00000207545; OTTHUMT00000207546; OTTHUMT00000207547	GO:0000122; GO:0001501; GO:0001712; GO:0006351; GO:0007498; GO:0030154; GO:0045893; GO:0045944; GO:0090009; GO:0006355	NM_001256295; NM_005239; ENST00000360214; ENST00000360938; ENST00000432278; ENST00000456966; BC017040; BC042954; OTTHUMT00000207544; OTTHUMT00000207545; OTTHUMT00000207546; OTTHUMT00000207547	GO:0005634; GO:0005654; GO:0005737; GO:0005886	NM_001256295; NM_005239; ENST00000360214; ENST00000360938; ENST00000432278; ENST00000456966; BC017040; BC042954; OTTHUMT00000207544; OTTHUMT00000207545; OTTHUMT00000207546; OTTHUMT00000207547	GO:0000978; GO:0001078; GO:0003677; GO:0003700; GO:0005515; GO:0035259; GO:0000977; GO:0043565	NM_001256295; NM_005239; ENST00000360214; ENST00000360938; ENST00000432278; ENST00000456966; BC017040; BC042954; OTTHUMT00000207544; OTTHUMT00000207545; OTTHUMT00000207546; OTTHUMT00000207547	GenMAPP	Smooth_muscle_contraction	main	Multiple_Complex	Hs01036300_g1
TC0100008271.hg.1	12.01	10.59	2.67	2.67	1	1	12.01	10.59	RNF11	ring finger protein 11	chr1	+	Multiple_Complex	51236271	51273455	NM_014372; ENST00000242719; ENST00000486691; ENST00000494873; BC020964; BC047654; OTTHUMT00000022419; OTTHUMT00000022420; OTTHUMT00000091259; CCDS556.1; hsa_circ_0012414; uc001csi.5; uc057gko.1; uc057gkq.1; NONHSAT003189	RefSeq; ENSEMBL; GenBank; Havana transcript; ccdsGene; circbase; UCSC Genes; lncRNAWiki; NONCODE	NM_014372; ENST00000242719; ENST00000486691; ENST00000494873; BC020964; BC047654; OTTHUMT00000022419; OTTHUMT00000022420; OTTHUMT00000091259	GO:0042787; GO:0051865; GO:0006511	NM_014372; ENST00000242719; ENST00000486691; ENST00000494873; BC020964; BC047654; OTTHUMT00000022419; OTTHUMT00000022420; OTTHUMT00000091259	GO:0000151; GO:0005634; GO:0005769; GO:0055037; GO:0070062; GO:0005737; GO:0005768	NM_014372; ENST00000242719; ENST00000486691; ENST00000494873; BC020964; BC047654; OTTHUMT00000022419; OTTHUMT00000022420; OTTHUMT00000091259	GO:0003677; GO:0004842; GO:0005515; GO:0008270; GO:0046872				main	Multiple_Complex	Hs00898574_g1
TC0100012329.hg.1	11.96	10.54	2.67	2.67	1	1	11.96	10.54	OR2W3	olfactory receptor, family 2, subfamily W, member 3	chr1	+	Coding	247895556	247896597	NM_001001957; ENST00000360358; BC146848; OTTHUMT00000096861; uc010pzb.2; CCDS31099.1	RefSeq; ENSEMBL; GenBank; Havana transcript; UCSC Genes; ccdsGene	NM_001001957; ENST00000360358; BC146848; OTTHUMT00000096861; uc010pzb.2	GO:0007186; GO:0007608; GO:0050911; GO:0007165; GO:0050896; GO:0016567	NM_001001957; ENST00000360358; BC146848; OTTHUMT00000096861; uc010pzb.2	GO:0005886; GO:0016021; GO:0016020; GO:0005622	NM_001001957; ENST00000360358; BC146848; OTTHUMT00000096861; uc010pzb.2	GO:0004930; GO:0004984; GO:0004871; GO:0008270; GO:0016874; GO:0046872				main	Coding	Hs02576575_s1
TC0100018260.hg.1	10.88	12.3	-2.67	2.67	1	1	10.88	12.3	AMPD2	adenosine monophosphate deaminase 2	chr1	+	Multiple_Complex	109616104	109672959	NM_001257360; NM_001257361; NM_001308170; NM_004037; NM_139156; NM_203404; ENST00000256578; ENST00000342115; ENST00000358729; ENST00000369840; ENST00000393688; ENST00000459643; ENST00000467071; ENST00000469039; ENST00000474459; ENST00000476688; ENST00000479919; ENST00000486282; ENST00000524975; ENST00000525415; ENST00000526301; ENST00000527846; ENST00000528270; ENST00000528454; ENST00000528667; E…	RefSeq; ENSEMBL; GenBank; Havana transcript; UCSC Genes; Ace View; ccdsGene; circbase; lncRNAWiki; NONCODE			NM_001257360; NM_001257361; NM_001308170; NM_004037; NM_139156; NM_203404; ENST00000256578; ENST00000342115; ENST00000358729; ENST00000369840; ENST00000393688; ENST00000459643; ENST00000467071; ENST00000469039; ENST00000474459; ENST00000476688; ENST00000479919; ENST00000486282; ENST00000524975; ENST00000525415; ENST00000526301; ENST00000527846; ENST00000528270; ENST00000528454; ENST00000528667; E…	GO:0005829; GO:0005575						main	Multiple_Complex	Hs01092048_g1
TC0Y00006444.hg.1	12.13	13.54	-2.67	2.67	1	1	12.13	13.54	CSF2RA	colony stimulating factor 2 receptor, alpha, low-affinity (granulocyte-macrophage)	chrY	+	Multiple_Complex	1268800	1310381	NM_172249; NR_027760; uc010nvt.2; uc011naj.1; NM_001161529_2; NM_001161530_2; NM_001161531_2; NM_001161532_2; NM_006140_2; NM_172245_2; NM_172246_2; NM_172247_2; ENSTR0000355432; ENSTR0000355805; ENSTR0000381500; ENSTR0000381509; ENSTR0000381524; ENSTR0000381529; ENSTR0000412290; ENSTR0000417535; ENSTR0000419094; ENSTR0000432318; ENSTR0000475259; ENSTR0000477940; ENSTR0000478256; ENSTR0000481245;…	RefSeq; UCSC Genes; ENSEMBL; GenBank; ccdsGene; circbase; Guo; lncRNAWiki; NONCODE	NM_172249; NR_027760; uc010nvt.2; uc011naj.1	GO:0000165; GO:0000186; GO:0007173; GO:0007264; GO:0007265; GO:0007411; GO:0008286; GO:0008543; GO:0038095; GO:0038158; GO:0044267; GO:0045087; GO:0048010; GO:0048011; GO:0097011	NM_172249; NR_027760; uc010nvt.2; uc011naj.1	GO:0005576; GO:0005622; GO:0005886; GO:0005887; GO:0016020; GO:0016021	NM_172249; NR_027760; uc010nvt.2; uc011naj.1	GO:0004872; GO:0004902; GO:0005515; GO:0051916; GO:0004896				main	Multiple_Complex	Hs00531296_g1
TC1400007804.hg.1	5.02	3.6	2.67	2.67	1	1	5.02	3.6	TSHR	thyroid stimulating hormone receptor	chr14	+	Multiple_Complex	80954989	81146302	NM_000369; NM_001018036; NM_001142626; ENST00000298171; ENST00000342443; ENST00000541158; ENST00000553763; ENST00000554263; ENST00000554435; ENST00000555326; ENST00000556031; ENST00000557096; OTTHUMT00000413363; OTTHUMT00000413364; OTTHUMT00000413366; OTTHUMT00000413367; OTTHUMT00000413368; OTTHUMT00000413369; OTTHUMT00000413370; OTTHUMT00000413371; uc001xvd.1; BC156779; CCDS32131.1; CCDS55935.1;…	RefSeq; ENSEMBL; Havana transcript; UCSC Genes; GenBank; ccdsGene; Ace View; lncRNAWiki; NONCODE			NM_000369; NM_001018036; NM_001142626; ENST00000298171; ENST00000342443; ENST00000541158; ENST00000553763; ENST00000554263; ENST00000554435; ENST00000555326; ENST00000556031; ENST00000557096; OTTHUMT00000413363; OTTHUMT00000413364; OTTHUMT00000413366; OTTHUMT00000413367; OTTHUMT00000413368; OTTHUMT00000413369; OTTHUMT00000413370; OTTHUMT00000413371; uc001xvd.1	GO:0005886; GO:0005887; GO:0043235; GO:0016020; GO:0016021	NM_000369; NM_001018036; NM_001142626; ENST00000298171; ENST00000342443; ENST00000541158; ENST00000553763; ENST00000554263; ENST00000554435; ENST00000555326; ENST00000556031; ENST00000557096; OTTHUMT00000413363; OTTHUMT00000413364; OTTHUMT00000413366; OTTHUMT00000413367; OTTHUMT00000413368; OTTHUMT00000413369; OTTHUMT00000413370; OTTHUMT00000413371; uc001xvd.1	GO:0004996; GO:0005515; GO:0008528; GO:0004871; GO:0004930; GO:0016500	NM_000369; NM_001018036; NM_001142626; ENST00000298171; ENST00000342443; ENST00000541158; ENST00000553763; ENST00000554263; ENST00000554435; ENST00000555326; ENST00000556031; ENST00000557096; OTTHUMT00000413363; OTTHUMT00000413364; OTTHUMT00000413366; OTTHUMT00000413367; OTTHUMT00000413368; OTTHUMT00000413369; OTTHUMT00000413370; OTTHUMT00000413371; uc001xvd.1	GenMAPP	GPCRDB_Other; Peptide_GPCRs	main	Multiple_Complex	Hs01053843_m1
TC0200013779.hg.1	4.01	5.43	-2.66	2.66	1	1	4.01	5.43	ST6GAL2	ST6 beta-galactosamide alpha-2,6-sialyltranferase 2	chr2	-	Multiple_Complex	106801600	106887108	NM_001142351; NM_001142352; NM_032528; ENST00000361686; ENST00000361803; ENST00000409087; ENST00000409382; ENST00000419159; BC008680; OTTHUMT00000253517; OTTHUMT00000330064; OTTHUMT00000330065; OTTHUMT00000330066; OTTHUMT00000330067; uc002tdr.3; CCDS2073.1; CCDS46380.1; hsa_circ_0055953; hsa_circ_0055954; hsa_circ_0055955; hsa_circ_0055956; hsa_circ_0055957; ST6GAL2.aAug10; ST6GAL2.cAug10; uc002t…	RefSeq; ENSEMBL; GenBank; Havana transcript; UCSC Genes; ccdsGene; circbase; Ace View; Guo	NM_001142351; NM_001142352; NM_032528; ENST00000361686; ENST00000361803; ENST00000409087; ENST00000409382; ENST00000419159; BC008680; OTTHUMT00000253517; OTTHUMT00000330064; OTTHUMT00000330065; OTTHUMT00000330066; OTTHUMT00000330067; uc002tdr.3	GO:0006488; GO:0007275; GO:0009311; GO:0016266; GO:0018279; GO:0040007; GO:0043687; GO:0044267; GO:0097503; GO:0005975; GO:0006486; GO:0055114	NM_001142351; NM_001142352; NM_032528; ENST00000361686; ENST00000361803; ENST00000409087; ENST00000409382; ENST00000419159; BC008680; OTTHUMT00000253517; OTTHUMT00000330064; OTTHUMT00000330065; OTTHUMT00000330066; OTTHUMT00000330067; uc002tdr.3	GO:0000139; GO:0016021; GO:0032580; GO:0005794; GO:0016020	NM_001142351; NM_001142352; NM_032528; ENST00000361686; ENST00000361803; ENST00000409087; ENST00000409382; ENST00000419159; BC008680; OTTHUMT00000253517; OTTHUMT00000330064; OTTHUMT00000330065; OTTHUMT00000330066; OTTHUMT00000330067; uc002tdr.3	GO:0003835; GO:0003824; GO:0008373; GO:0016740; GO:0016757; GO:0008718; GO:0016491				main	Multiple_Complex	Hs00383640_m1
TC0700013581.hg.1	13.62	15.03	-2.66	2.66	1	1	13.62	15.03	STEAP4	STEAP family member 4	chr7	-	Coding	88276429	88306913	NM_001205315; NM_001205316; NM_024636; ENST00000301959; ENST00000414498; BC020600; OTTHUMT00000332711; OTTHUMT00000332750; CCDS43611.1; CCDS56494.1; uc010lek.4; uc064fdc.1	RefSeq; ENSEMBL; GenBank; Havana transcript; ccdsGene; UCSC Genes	NM_001205315; NM_001205316; NM_024636; ENST00000301959; ENST00000414498; BC020600; OTTHUMT00000332711; OTTHUMT00000332750	GO:0015677; GO:0045444; GO:0055072; GO:0055114; GO:0097461; GO:0006810; GO:0006811	NM_001205315; NM_001205316; NM_024636; ENST00000301959; ENST00000414498; BC020600; OTTHUMT00000332711; OTTHUMT00000332750	GO:0000139; GO:0005768; GO:0005886; GO:0005887; GO:0070062; GO:0005794; GO:0016020; GO:0016021	NM_001205315; NM_001205316; NM_024636; ENST00000301959; ENST00000414498; BC020600; OTTHUMT00000332711; OTTHUMT00000332750	GO:0008823; GO:0046872; GO:0052851; GO:0016491				main	Coding	Hs01026584_m1
TC0800012147.hg.1	13.76	12.35	2.66	2.66	1	1	13.76	12.35	TSTA3	tissue specific transplantation antigen P35B	chr8	-	Multiple_Complex	143612618	143618048	NM_003313; ENST00000425753; ENST00000524719; ENST00000525274; ENST00000526290; ENST00000527006; ENST00000527549; ENST00000527677; ENST00000528920; ENST00000529048; ENST00000529064; ENST00000529899; ENST00000530474; ENST00000531006; ENST00000531473; ENST00000532308; ENST00000533817; BC001941; BC093061; OTTHUMT00000382261; OTTHUMT00000382262; OTTHUMT00000382263; OTTHUMT00000382264; OTTHUMT000003822…	RefSeq; ENSEMBL; GenBank; Havana transcript; ccdsGene; circbase; Ace View; UCSC Genes; lncRNAWiki; NONCODE	NM_003313; ENST00000425753; ENST00000524719; ENST00000525274; ENST00000526290; ENST00000527006; ENST00000527549; ENST00000527677; ENST00000528920; ENST00000529048; ENST00000529064; ENST00000529899; ENST00000530474; ENST00000531006; ENST00000531473; ENST00000532308; ENST00000533817; BC001941; BC093061; OTTHUMT00000382261; OTTHUMT00000382262; OTTHUMT00000382263; OTTHUMT00000382264; OTTHUMT000003822…	GO:0007159; GO:0019673; GO:0019835; GO:0042351; GO:0055114; GO:0008152	NM_003313; ENST00000425753; ENST00000524719; ENST00000525274; ENST00000526290; ENST00000527006; ENST00000527549; ENST00000527677; ENST00000528920; ENST00000529048; ENST00000529064; ENST00000529899; ENST00000530474; ENST00000531006; ENST00000531473; ENST00000532308; ENST00000533817; BC001941; BC093061; OTTHUMT00000382261; OTTHUMT00000382262; OTTHUMT00000382263; OTTHUMT00000382264; OTTHUMT000003822…	GO:0005737; GO:0070062	NM_003313; ENST00000425753; ENST00000524719; ENST00000525274; ENST00000526290; ENST00000527006; ENST00000527549; ENST00000527677; ENST00000528920; ENST00000529048; ENST00000529064; ENST00000529899; ENST00000530474; ENST00000531006; ENST00000531473; ENST00000532308; ENST00000533817; BC001941; BC093061; OTTHUMT00000382261; OTTHUMT00000382262; OTTHUMT00000382263; OTTHUMT00000382264; OTTHUMT000003822…	GO:0009055; GO:0016853; GO:0042356; GO:0050577; GO:0050662; GO:0003824; GO:0016491	NM_003313; BC001941	HumanCyc	PWY-66	main	Multiple_Complex	Hs02559982_s1
TC0900012151.hg.1	5.03	6.44	-2.66	2.66	1	1	5.03	6.44	ANKRD19P	ankyrin repeat domain 19, pseudogene	chr9	+	Multiple_Complex	92809568	92838458	NR_026868; BC038951; BC117367; BC171729; ANKRD19.cAug10; hsa_circ_0087516; ENST00000338192; ENST00000460854; ENST00000464387; ENST00000465736; ENST00000492083; NONHSAT133206; NONHSAT133208; OTTHUMT00000053113; OTTHUMT00000053114; OTTHUMT00000053115; OTTHUMT00000316908; OTTHUMT00000316909	RefSeq; GenBank; Ace View; circbase; ENSEMBL; lncRNAWiki; NONCODE; Havana transcript			NR_026868; BC038951; BC117367; BC171729	GO:0070062						main	Multiple_Complex	Hs00420427_m1
TC1000007544.hg.1	5.83	4.42	2.66	2.66	1	1	5.83	4.42	GDF2	growth differentiation factor 2	chr10	+	Coding	47322490	47326270	NM_016204; ENST00000581492; BC069643; BC074921; OTTHUMT00000476889; CCDS73118.1; uc001jfa.2	RefSeq; ENSEMBL; GenBank; Havana transcript; ccdsGene; UCSC Genes	NM_016204; ENST00000581492; BC069643; BC074921; OTTHUMT00000476889	GO:0001503; GO:0001525; GO:0001569; GO:0001570; GO:0001649; GO:0001937; GO:0001938; GO:0006879; GO:0008156; GO:0010596; GO:0010862; GO:0016525; GO:0030308; GO:0030509; GO:0030513; GO:0032757; GO:0032924; GO:0040007; GO:0042981; GO:0043408; GO:0043537; GO:0045603; GO:0045669; GO:0045766; GO:0045893; GO:0045944; GO:0048468; GO:0048514; GO:0051216; GO:0060389; GO:0060395; GO:0061036; GO:0071773; GO:…	NM_016204; ENST00000581492; BC069643; BC074921; OTTHUMT00000476889	GO:0005615; GO:0005623; GO:0070062; GO:0005576	NM_016204; ENST00000581492; BC069643; BC074921; OTTHUMT00000476889	GO:0005125; GO:0005160; GO:0005515; GO:0008083				main	Coding	Hs00211913_m1
TC1000008193.hg.1	8.85	10.26	-2.66	2.66	1	1	8.85	10.26	PPIF	peptidylprolyl isomerase F	chr10	+	Multiple_Complex	79347464	79355337	NM_005729; ENST00000225174; ENST00000448165; ENST00000472580; ENST00000492149; ENST00000498681; BC005020; BC110299; OTTHUMT00000048949; OTTHUMT00000048950; OTTHUMT00000048951; OTTHUMT00000048952; OTTHUMT00000048953; CCDS7358.1; hsa_circ_0018970; hsa_circ_0018971; hsa_circ_0018972; uc001kai.4; uc057ulb.1; uc057ulc.1; uc057uld.1; uc057ule.1	RefSeq; ENSEMBL; GenBank; Havana transcript; ccdsGene; circbase; UCSC Genes			NM_005729; ENST00000225174; ENST00000448165; ENST00000472580; ENST00000492149; ENST00000498681; BC005020; BC110299; OTTHUMT00000048949; OTTHUMT00000048950; OTTHUMT00000048951; OTTHUMT00000048952; OTTHUMT00000048953	GO:0005739; GO:0005753; GO:0005759; GO:0016020; GO:0005743	NM_005729; ENST00000225174; ENST00000448165; ENST00000472580; ENST00000492149; ENST00000498681; BC005020; BC110299; OTTHUMT00000048949; OTTHUMT00000048950; OTTHUMT00000048951; OTTHUMT00000048952; OTTHUMT00000048953	GO:0003755; GO:0005515; GO:0016018; GO:0016853; GO:0042277				main	Multiple_Complex	Hs00194847_m1
TC1000008568.hg.1	9.17	10.58	-2.66	2.66	1	1	9.17	10.58	FRAT1	frequently rearranged in advanced T-cell lymphomas 1	chr10	+	Multiple_Complex	97319265	97321915	NM_005479; ENST00000371021; ENST00000490980; BC034476; OTTHUMT00000049673; OTTHUMT00000049674; CCDS7455.1; FRAT1.aAug10-unspliced; FRAT1.bAug10; uc001knc.2; uc057vdx.1; NONHSAT015854	RefSeq; ENSEMBL; GenBank; Havana transcript; ccdsGene; Ace View; UCSC Genes; lncRNAWiki; NONCODE	NM_005479; ENST00000371021; ENST00000490980; BC034476; OTTHUMT00000049673; OTTHUMT00000049674	GO:0000578; GO:0016055; GO:0090263	NM_005479; ENST00000371021; ENST00000490980; BC034476; OTTHUMT00000049673; OTTHUMT00000049674	GO:0005829; GO:0005737			NM_005479; ENST00000371021; ENST00000490980; BC034476; OTTHUMT00000049673; OTTHUMT00000049674	GenMAPP	Wnt_signaling	main	Multiple_Complex	Hs00271384_s1
TC1000008670.hg.1	6.4	4.99	2.66	2.66	1	1	6.4	4.99	TLX1	T-cell leukemia homeobox 1	chr10	+	Multiple_Complex	101130505	101137789	NM_001195517; NM_005521; ENST00000370196; ENST00000463716; ENST00000467928; ENST00000525019; ENST00000533319; BC130530; OTTHUMT00000051193; OTTHUMT00000051194; OTTHUMT00000394896; OTTHUMT00000394897; OTTHUMT00000409763; CCDS55725.1; CCDS7510.1; TLX1.cAug10; uc001ksw.4; uc021pxd.2; uc057vmm.1; uc057vmn.1; uc057vmo.1; NONHSAT016016; NONHSAT016017	RefSeq; ENSEMBL; GenBank; Havana transcript; ccdsGene; Ace View; UCSC Genes; lncRNAWiki; NONCODE	NM_001195517; NM_005521; ENST00000370196; ENST00000463716; ENST00000467928; ENST00000525019; ENST00000533319; BC130530; OTTHUMT00000051193; OTTHUMT00000051194; OTTHUMT00000394896; OTTHUMT00000394897; OTTHUMT00000409763	GO:0006366; GO:0007417; GO:0008284; GO:0030182; GO:0045165; GO:0045944; GO:0048536; GO:0048645; GO:0006355; GO:0007275	NM_001195517; NM_005521; ENST00000370196; ENST00000463716; ENST00000467928; ENST00000525019; ENST00000533319; BC130530; OTTHUMT00000051193; OTTHUMT00000051194; OTTHUMT00000394896; OTTHUMT00000394897; OTTHUMT00000409763	GO:0005634	NM_001195517; NM_005521; ENST00000370196; ENST00000463716; ENST00000467928; ENST00000525019; ENST00000533319; BC130530; OTTHUMT00000051193; OTTHUMT00000051194; OTTHUMT00000394896; OTTHUMT00000394897; OTTHUMT00000409763	GO:0000978; GO:0001077; GO:0005515; GO:0046982; GO:0003677; GO:0043565				main	Multiple_Complex	Hs00271457_m1
TC1300008760.hg.1	10.39	8.98	2.66	2.66	1	1	10.39	8.98	EPSTI1	epithelial stromal interaction 1 (breast)	chr13	-	Multiple_Complex	42886388	42992271	NM_001002264; NM_033255; ENST00000313624; ENST00000313640; ENST00000398762; ENST00000476830; ENST00000535677; ENST00000536042; ENST00000537828; ENST00000538562; ENST00000540470; ENST00000542706; BC023660; OTTHUMT00000044711; OTTHUMT00000044712; OTTHUMT00000276154; OTTHUMT00000400320; OTTHUMT00000400321; OTTHUMT00000400322; OTTHUMT00000400323; OTTHUMT00000400324; OTTHUMT00000400325; OTTHUMT0000040…	RefSeq; ENSEMBL; GenBank; Havana transcript; ccdsGene; Ace View; circbase; UCSC Genes; Guo; lncRNAWiki; NONCODE										main	Multiple_Complex	Hs01566785_m1
TC0100016049.hg.1	12.1	10.69	2.65	2.65	1	1	12.1	10.69	FCRL3	Fc receptor-like 3	chr1	-	Multiple_Complex	157674321	157700857	NM_052939; ENST00000368184; ENST00000368186; ENST00000457799; ENST00000468507; ENST00000473231; ENST00000477837; ENST00000478179; ENST00000480682; ENST00000485028; ENST00000492769; ENST00000494724; ENST00000496769; BC028933; OTTHUMT00000051414; OTTHUMT00000051415; OTTHUMT00000051416; OTTHUMT00000051417; OTTHUMT00000051419; OTTHUMT00000051420; OTTHUMT00000051421; OTTHUMT00000051422; OTTHUMT0000005…	RefSeq; ENSEMBL; GenBank; Havana transcript; ccdsGene; Ace View; UCSC Genes; lncRNAWiki; NONCODE			NM_052939; ENST00000368184; ENST00000368186; ENST00000457799; ENST00000468507; ENST00000473231; ENST00000477837; ENST00000478179; ENST00000480682; ENST00000485028; ENST00000492769; ENST00000494724; ENST00000496769; BC028933; OTTHUMT00000051414; OTTHUMT00000051415; OTTHUMT00000051416; OTTHUMT00000051417; OTTHUMT00000051419; OTTHUMT00000051420; OTTHUMT00000051421; OTTHUMT00000051422; OTTHUMT0000005…	GO:0005886; GO:0016021; GO:0016020	ENST00000368184; ENST00000368186; ENST00000496769	GO:0005515				main	Multiple_Complex	Hs00364720_m1
TC0X00009493.hg.1	8.02	9.43	-2.65	2.65	1	1	8.02	9.43	EFHC2	EF-hand domain (C-terminal) containing 2	chrX	-	Multiple_Complex	44147882	44343677	NM_025184; ENST00000343571; ENST00000420999; BC031039; OTTHUMT00000056312; OTTHUMT00000056314; CCDS55405.1; uc004dgb.5; uc064yrq.1	RefSeq; ENSEMBL; GenBank; Havana transcript; ccdsGene; UCSC Genes					NM_025184; ENST00000343571; ENST00000420999; BC031039; OTTHUMT00000056312; OTTHUMT00000056314	GO:0005509; GO:0005515				main	Multiple_Complex	Hs00257889_m1
TC1100010041.hg.1	4.24	5.64	-2.65	2.65	1	1	4.24	5.64	ST5	Transcript Identified by AceView, Entrez Gene ID(s) 6764	chr11	-	Unassigned	8783645	8784204	ST5.wbAug10-unspliced	Ace View										main	Unassigned	Hs05387069_s1
TC1700009613.hg.1	6.15	7.56	-2.65	2.65	1	1	6.15	7.56	ASGR2	asialoglycoprotein receptor 2	chr17	-	Multiple_Complex	7101322	7115700	NM_001181; NM_001201352; NM_080912; NM_080913; NM_080914; ENST00000254850; ENST00000355035; ENST00000446679; ENST00000450034; ENST00000574868; ENST00000576487; BC017251; OTTHUMT00000220002; OTTHUMT00000220003; OTTHUMT00000439918; OTTHUMT00000439920; OTTHUMT00000439921; OTTHUMT00000439938; CCDS11088.1; CCDS32544.1; CCDS45598.1; hsa_circ_0041759; hsa_circ_0041760; uc002gen.2; uc002geq.4; uc002ger.4…	RefSeq; ENSEMBL; GenBank; Havana transcript; ccdsGene; circbase; UCSC Genes	NM_001181; NM_001201352; NM_080912; NM_080913; NM_080914; ENST00000254850; ENST00000355035; ENST00000446679; ENST00000450034; ENST00000574868; ENST00000576487; BC017251; OTTHUMT00000220002; OTTHUMT00000220003; OTTHUMT00000439918; OTTHUMT00000439920; OTTHUMT00000439921; OTTHUMT00000439938	GO:0006898; GO:0007166; GO:0009100; GO:0030282; GO:0031647; GO:0055088; GO:0006897	NM_001181; NM_001201352; NM_080912; NM_080913; NM_080914; ENST00000254850; ENST00000355035; ENST00000446679; ENST00000450034; ENST00000574868; ENST00000576487; BC017251; OTTHUMT00000220002; OTTHUMT00000220003; OTTHUMT00000439918; OTTHUMT00000439920; OTTHUMT00000439921; OTTHUMT00000439938	GO:0016021; GO:0016020	NM_001181; NM_001201352; NM_080912; NM_080913; NM_080914; ENST00000254850; ENST00000355035; ENST00000446679; ENST00000450034; ENST00000574868; ENST00000576487; BC017251; OTTHUMT00000220002; OTTHUMT00000220003; OTTHUMT00000439918; OTTHUMT00000439920; OTTHUMT00000439921; OTTHUMT00000439938	GO:0004873; GO:0005515; GO:0030246				main	Multiple_Complex	Hs00154160_m1
TC1900010073.hg.1	10.3	11.71	-2.65	2.65	1	1	10.3	11.71	LPAR2	lysophosphatidic acid receptor 2	chr19	-	Multiple_Complex	19623656	19628930	NM_004720; ENST00000407877; ENST00000542587; ENST00000586703; ENST00000588233; ENST00000588461; ENST00000589311; ENST00000590629; ENST00000591042; ENST00000592061; BC025695; OTTHUMT00000460542; OTTHUMT00000460543; OTTHUMT00000460544; OTTHUMT00000460545; OTTHUMT00000460546; OTTHUMT00000460547; OTTHUMT00000460548; OTTHUMT00000460549; OTTHUMT00000460550; CCDS12407.1; uc002nna.6; uc002nnb.6; uc002nnc…	RefSeq; ENSEMBL; GenBank; Havana transcript; ccdsGene; UCSC Genes; lncRNAWiki; NONCODE	NM_004720; ENST00000407877; ENST00000542587; ENST00000586703; ENST00000588233; ENST00000588461; ENST00000589311; ENST00000590629; ENST00000591042; ENST00000592061; BC025695; OTTHUMT00000460542; OTTHUMT00000460543; OTTHUMT00000460544; OTTHUMT00000460545; OTTHUMT00000460546; OTTHUMT00000460547; OTTHUMT00000460548; OTTHUMT00000460549; OTTHUMT00000460550	GO:0000187; GO:0007186; GO:0007202; GO:0007204; GO:0035025; GO:0007165; GO:0043410	NM_004720; ENST00000407877; ENST00000542587; ENST00000586703; ENST00000588233; ENST00000588461; ENST00000589311; ENST00000590629; ENST00000591042; ENST00000592061; BC025695; OTTHUMT00000460542; OTTHUMT00000460543; OTTHUMT00000460544; OTTHUMT00000460545; OTTHUMT00000460546; OTTHUMT00000460547; OTTHUMT00000460548; OTTHUMT00000460549; OTTHUMT00000460550	GO:0005829; GO:0005886; GO:0005887; GO:0009986; GO:0030139; GO:0016020; GO:0016021	NM_004720; ENST00000407877; ENST00000542587; ENST00000586703; ENST00000588233; ENST00000588461; ENST00000589311; ENST00000590629; ENST00000591042; ENST00000592061; BC025695; OTTHUMT00000460542; OTTHUMT00000460543; OTTHUMT00000460544; OTTHUMT00000460545; OTTHUMT00000460546; OTTHUMT00000460547; OTTHUMT00000460548; OTTHUMT00000460549; OTTHUMT00000460550	GO:0004930; GO:0005515; GO:0008289; GO:0030165; GO:0070915; GO:0004871				main	Multiple_Complex	Hs00173704_m1
TC0400006951.hg.1	12.65	11.25	2.64	2.64	1	1	12.65	11.25	CD38	CD38 molecule	chr4	+	Multiple_Complex	15778275	15853230	NM_001775; ENST00000226279; ENST00000502843; ENST00000506191; ENST00000510674; ENST00000511430; BC007964; OTTHUMT00000250322; OTTHUMT00000359588; OTTHUMT00000359589; OTTHUMT00000359590; OTTHUMT00000359591; CCDS3417.1; CD38.gAug10; hsa_circ_0069233; uc003gol.2; uc021xmk.2; uc062viu.1; uc062viv.1; uc062viw.1	RefSeq; ENSEMBL; GenBank; Havana transcript; ccdsGene; Ace View; circbase; UCSC Genes	NM_001775; ENST00000226279; ENST00000502843; ENST00000506191; ENST00000510674; ENST00000511430; BC007964; OTTHUMT00000250322; OTTHUMT00000359588; OTTHUMT00000359589; OTTHUMT00000359590; OTTHUMT00000359591	GO:0001666; GO:0007165; GO:0007204; GO:0007565; GO:0008152; GO:0030307; GO:0030890; GO:0032024; GO:0032355; GO:0032526; GO:0032570; GO:0033194; GO:0042493; GO:0043066; GO:0045779; GO:0045892; GO:0045893; GO:0045907; GO:0050853; GO:0060292; GO:0070555; GO:0097190; GO:0009725; GO:0034097	NM_001775; ENST00000226279; ENST00000502843; ENST00000506191; ENST00000510674; ENST00000511430; BC007964; OTTHUMT00000250322; OTTHUMT00000359588; OTTHUMT00000359589; OTTHUMT00000359590; OTTHUMT00000359591	GO:0005634; GO:0005829; GO:0005886; GO:0009986; GO:0016020; GO:0016021; GO:0070062; GO:0043231	NM_001775; ENST00000226279; ENST00000502843; ENST00000506191; ENST00000510674; ENST00000511430; BC007964; OTTHUMT00000250322; OTTHUMT00000359588; OTTHUMT00000359589; OTTHUMT00000359590; OTTHUMT00000359591	GO:0003953; GO:0016740; GO:0016849; GO:0050135; GO:0016787; GO:0016798	NM_001775; BC007964	HumanCyc; MetaCyc	PYRIDNUCSAL-PWY	main	Multiple_Complex	Hs00277045_m1
TC1900011257.hg.1	5.35	6.75	-2.64	2.64	1	1	5.35	6.75	SIGLEC8	sialic acid binding Ig-like lectin 8	chr19	-	Multiple_Complex	51450847	51458456	NM_014442; ENST00000321424; ENST00000340550; ENST00000430817; ENST00000597352; BC053319; OTTHUMT00000463647; OTTHUMT00000463648; OTTHUMT00000464143; OTTHUMT00000466884; uc002pwt.3; CCDS33086.1; uc010eox.3; uc010yda.3; uc061bxr.1; NONHSAT067443	RefSeq; ENSEMBL; GenBank; Havana transcript; UCSC Genes; ccdsGene; lncRNAWiki; NONCODE	NM_014442; ENST00000321424; ENST00000340550; ENST00000430817; ENST00000597352; BC053319; OTTHUMT00000463647; OTTHUMT00000463648; OTTHUMT00000464143; OTTHUMT00000466884; uc002pwt.3	GO:0007155; GO:0007165	NM_014442; ENST00000321424; ENST00000340550; ENST00000430817; ENST00000597352; BC053319; OTTHUMT00000463647; OTTHUMT00000463648; OTTHUMT00000464143; OTTHUMT00000466884; uc002pwt.3	GO:0016021; GO:0016020	NM_014442; ENST00000321424; ENST00000340550; ENST00000430817; ENST00000597352; BC053319; OTTHUMT00000463647; OTTHUMT00000463648; OTTHUMT00000464143; OTTHUMT00000466884; uc002pwt.3	GO:0004888; GO:0005515; GO:0030246				main	Multiple_Complex	Hs00274289_m1
TC0400008624.hg.1	7.07	5.67	2.63	2.63	1	1	7.07	5.67	SPATA5	Transcript Identified by AceView, Entrez Gene ID(s) 166378	chr4	+	Unassigned	123256308	123256876	SPATA5.eAug10-unspliced	Ace View										main	Unassigned	Hs05438060_s1
TC0800008783.hg.1	7.35	5.95	2.63	2.63	1	1	7.35	5.95	SQLE	squalene epoxidase	chr8	+	Multiple_Complex	124998478	125022283	NM_003129; ENST00000265896; ENST00000518604; ENST00000518931; ENST00000520493; ENST00000521232; ENST00000523430; BC017033; OTTHUMT00000381361; OTTHUMT00000381362; OTTHUMT00000381363; OTTHUMT00000381365; OTTHUMT00000381366; OTTHUMT00000381367; CCDS47918.1; hsa_circ_0085509; hsa_circ_0085510; hsa_circ_0085511; hsa_circ_0085512; hsa_circ_0085513; hsa_circ_0085514; hsa_circ_0085515; hsa_circ_0085516;…	RefSeq; ENSEMBL; GenBank; Havana transcript; ccdsGene; circbase; Ace View; UCSC Genes; Guo; lncRNAWiki; NONCODE	NM_003129; ENST00000265896; ENST00000518604; ENST00000518931; ENST00000520493; ENST00000521232; ENST00000523430; BC017033; OTTHUMT00000381361; OTTHUMT00000381362; OTTHUMT00000381363; OTTHUMT00000381365; OTTHUMT00000381366; OTTHUMT00000381367	GO:0006695; GO:0006725; GO:0010033; GO:0016126; GO:0044281; GO:0055114; GO:0008203; GO:0008152	NM_003129; ENST00000265896; ENST00000518604; ENST00000518931; ENST00000520493; ENST00000521232; ENST00000523430; BC017033; OTTHUMT00000381361; OTTHUMT00000381362; OTTHUMT00000381363; OTTHUMT00000381365; OTTHUMT00000381366; OTTHUMT00000381367	GO:0005789; GO:0016021; GO:0005783; GO:0016020; GO:0031090; GO:0043231	NM_003129; ENST00000265896; ENST00000518604; ENST00000518931; ENST00000520493; ENST00000521232; ENST00000523430; BC017033; OTTHUMT00000381361; OTTHUMT00000381362; OTTHUMT00000381363; OTTHUMT00000381365; OTTHUMT00000381366; OTTHUMT00000381367	GO:0004506; GO:0050660; GO:0016491; GO:0004497; GO:0071949	NM_003129; ENST00000265896; ENST00000518604; ENST00000518931; ENST00000520493; ENST00000521232; ENST00000523430; BC017033; OTTHUMT00000381361; OTTHUMT00000381362; OTTHUMT00000381363; OTTHUMT00000381365; OTTHUMT00000381366; OTTHUMT00000381367	GenMAPP; HumanCyc	Cholesterol_Biosynthesis; PWY-5670	main	Multiple_Complex	Hs01123767_g1
TC1200010812.hg.1	10.58	11.97	-2.63	2.63	1	1	10.58	11.97	CALCOCO1	calcium binding and coiled-coil domain 1	chr12	-	Multiple_Complex	53708517	53727745	NM_001143682; NM_020898; NR_026554; ENST00000262059; ENST00000430117; ENST00000546443; ENST00000546619; ENST00000546774; ENST00000547885; ENST00000547949; ENST00000547988; ENST00000548177; ENST00000548263; ENST00000548431; ENST00000549173; ENST00000549349; ENST00000549613; ENST00000549688; ENST00000549784; ENST00000549935; ENST00000550804; ENST00000551900; ENST00000552282; ENST00000552623; ENST00…	RefSeq; ENSEMBL; GenBank; Havana transcript; Ace View; ccdsGene; circbase; UCSC Genes; lncRNAWiki; NONCODE			NM_001143682; NM_020898; NR_026554; ENST00000262059; ENST00000430117; ENST00000546443; ENST00000546619; ENST00000546774; ENST00000547885; ENST00000547949; ENST00000547988; ENST00000548177; ENST00000548263; ENST00000548431; ENST00000549173; ENST00000549349; ENST00000549613; ENST00000549688; ENST00000549784; ENST00000549935; ENST00000550804; ENST00000551900; ENST00000552282; ENST00000552623; ENST00…	GO:0000790; GO:0005634; GO:0005737; GO:0043231						main	Multiple_Complex	Hs01548319_g1
TC1400007259.hg.1	9.09	10.49	-2.63	2.63	1	1	9.09	10.49	PELI2	pellino E3 ubiquitin protein ligase family member 2	chr14	+	Multiple_Complex	56117814	56301526	NM_021255; ENST00000267460; ENST00000559044; ENST00000561019; BC009476; OTTHUMT00000276925; OTTHUMT00000416949; OTTHUMT00000416950; CCDS9726.1; hsa_circ_0000541; hsa_circ_0032038; hsa_circ_0032039; uc001xch.4; uc059buo.1; uc059bup.1; chr14_56746393_56757174	RefSeq; ENSEMBL; GenBank; Havana transcript; ccdsGene; circbase; UCSC Genes; Guo	NM_021255; ENST00000267460; ENST00000559044; ENST00000561019; BC009476; OTTHUMT00000276925; OTTHUMT00000416949; OTTHUMT00000416950	GO:0001934; GO:0002224; GO:0002755; GO:0008063; GO:0016567; GO:0034134; GO:0034142; GO:0034146; GO:0034162; GO:0034166; GO:0038123; GO:0038124; GO:0043123; GO:0043410; GO:0045087	NM_021255; ENST00000267460; ENST00000559044; ENST00000561019; BC009476; OTTHUMT00000276925; OTTHUMT00000416949; OTTHUMT00000416950	GO:0005829; GO:0016020; GO:0016021	NM_021255; ENST00000267460; ENST00000559044; ENST00000561019; BC009476; OTTHUMT00000276925; OTTHUMT00000416949; OTTHUMT00000416950	GO:0005515; GO:0016874				main	Multiple_Complex	Hs00222029_m1
TC1600007465.hg.1	7.27	5.87	2.63	2.63	1	1	7.27	5.87	ZNF48	zinc finger protein 48	chr16	+	Multiple_Complex	30378106	30400108	NM_001214906; NM_001214907; NM_001214909; NM_152652; ENST00000320159; ENST00000495929; ENST00000524644; ENST00000528032; ENST00000612608; ENST00000613509; ENST00000622647; BC041388; OTTHUMT00000255549; OTTHUMT00000351692; OTTHUMT00000394612; OTTHUMT00000394613; uc002dya.2; CCDS10679.1; CCDS73868.1; hsa_circ_0039035; uc021tgi.2; uc021tgj.2; uc021tgk.2; uc059tdq.1; uc059tdu.1; uc059tec.1	RefSeq; ENSEMBL; GenBank; Havana transcript; UCSC Genes; ccdsGene; circbase	NM_001214906; NM_001214907; NM_001214909; NM_152652; ENST00000320159; ENST00000495929; ENST00000524644; ENST00000528032; ENST00000612608; ENST00000613509; ENST00000622647; BC041388; OTTHUMT00000255549; OTTHUMT00000351692; OTTHUMT00000394612; OTTHUMT00000394613; uc002dya.2	GO:0006351; GO:0006355	NM_001214906; NM_001214907; NM_001214909; NM_152652; ENST00000320159; ENST00000495929; ENST00000524644; ENST00000528032; ENST00000612608; ENST00000613509; ENST00000622647; BC041388; OTTHUMT00000255549; OTTHUMT00000351692; OTTHUMT00000394612; OTTHUMT00000394613; uc002dya.2	GO:0005634	NM_001214906; NM_001214907; NM_001214909; NM_152652; ENST00000320159; ENST00000495929; ENST00000524644; ENST00000528032; ENST00000612608; ENST00000613509; ENST00000622647; BC041388; OTTHUMT00000255549; OTTHUMT00000351692; OTTHUMT00000394612; OTTHUMT00000394613; uc002dya.2	GO:0003677; GO:0046872; GO:0003676				main	Multiple_Complex	Hs00399035_m1
TC2200009357.hg.1	10.73	12.12	-2.63	2.63	1	1	10.73	12.12	PACSIN2	protein kinase C and casein kinase substrate in neurons 2	chr22	-	Multiple_Complex	42869766	43015178	NM_001184970; NM_001184971; NM_007229; ENST00000263246; ENST00000337959; ENST00000402229; ENST00000403744; ENST00000407585; ENST00000418133; ENST00000422336; ENST00000445706; ENST00000453079; ENST00000453643; BC008037; OTTHUMT00000319665; OTTHUMT00000319667; OTTHUMT00000319668; OTTHUMT00000319669; OTTHUMT00000319670; OTTHUMT00000319671; OTTHUMT00000319672; OTTHUMT00000319673; OTTHUMT00000319674; …	RefSeq; ENSEMBL; GenBank; Havana transcript; ccdsGene; circbase; Ace View; UCSC Genes	NM_001184970; NM_001184971; NM_007229; ENST00000263246; ENST00000337959; ENST00000402229; ENST00000403744; ENST00000407585; ENST00000418133; ENST00000422336; ENST00000445706; ENST00000453079; ENST00000453643; BC008037; OTTHUMT00000319665; OTTHUMT00000319667; OTTHUMT00000319668; OTTHUMT00000319669; OTTHUMT00000319670; OTTHUMT00000319671; OTTHUMT00000319672; OTTHUMT00000319673; OTTHUMT00000319674	GO:0030036; GO:0036010; GO:0045806; GO:0048858; GO:0070836; GO:0072584; GO:0097320; GO:0006897; GO:0030100			NM_001184970; NM_001184971; NM_007229; ENST00000263246; ENST00000337959; ENST00000402229; ENST00000403744; ENST00000407585; ENST00000418133; ENST00000422336; ENST00000445706; ENST00000453079; ENST00000453643; BC008037; OTTHUMT00000319665; OTTHUMT00000319667; OTTHUMT00000319668; OTTHUMT00000319669; OTTHUMT00000319670; OTTHUMT00000319671; OTTHUMT00000319672; OTTHUMT00000319673; OTTHUMT00000319674	GO:0005215; GO:0005515; GO:0008092; GO:0042802; GO:0070300; GO:0008289				main	Multiple_Complex	Hs01060726_m1
TC0300008705.hg.1	11.05	12.44	-2.62	2.62	1	1	11.05	12.44	ABTB1	ankyrin repeat and BTB (POZ) domain containing 1	chr3	+	Multiple_Complex	127672935	127680926	NM_032548; NM_172027; NR_033429; ENST00000232744; ENST00000453791; ENST00000464431; ENST00000466612; ENST00000467179; ENST00000468137; ENST00000474129; ENST00000475042; ENST00000475265; ENST00000478298; ENST00000479280; ENST00000483857; ENST00000491633; ENST00000493365; ENST00000497162; BC011858; OTTHUMT00000356595; OTTHUMT00000356598; OTTHUMT00000356599; OTTHUMT00000356600; OTTHUMT00000356601; O…	RefSeq; ENSEMBL; GenBank; Havana transcript; ccdsGene; circbase; UCSC Genes; lncRNAWiki; NONCODE	NM_032548; NM_172027; NR_033429; ENST00000232744; ENST00000453791; ENST00000464431; ENST00000466612; ENST00000467179; ENST00000468137; ENST00000474129; ENST00000475042; ENST00000475265; ENST00000478298; ENST00000479280; ENST00000483857; ENST00000491633; ENST00000493365; ENST00000497162; BC011858; OTTHUMT00000356595; OTTHUMT00000356598; OTTHUMT00000356599; OTTHUMT00000356600; OTTHUMT00000356601; O…	GO:0006414; GO:0006412	NM_032548; NM_172027; NR_033429; ENST00000232744; ENST00000453791; ENST00000464431; ENST00000466612; ENST00000467179; ENST00000468137; ENST00000474129; ENST00000475042; ENST00000475265; ENST00000478298; ENST00000479280; ENST00000483857; ENST00000491633; ENST00000493365; ENST00000497162; BC011858; OTTHUMT00000356595; OTTHUMT00000356598; OTTHUMT00000356599; OTTHUMT00000356600; OTTHUMT00000356601; O…	GO:0005730; GO:0005737; GO:0005886	NM_032548; NM_172027; NR_033429; ENST00000232744; ENST00000453791; ENST00000464431; ENST00000466612; ENST00000467179; ENST00000468137; ENST00000474129; ENST00000475042; ENST00000475265; ENST00000478298; ENST00000479280; ENST00000483857; ENST00000491633; ENST00000493365; ENST00000497162; BC011858; OTTHUMT00000356595; OTTHUMT00000356598; OTTHUMT00000356599; OTTHUMT00000356600; OTTHUMT00000356601; O…	GO:0003746; GO:0005515				main	Multiple_Complex	Hs00993044_g1
TC0500013320.hg.1	9.17	7.78	2.62	2.62	1	1	9.17	7.78	GTF2H2	general transcription factor IIH subunit 2	chr5	-	NonCoding	71033168	71034400	OTTHUMT00000372640; ENST00000520085.1; uc063eja.1; ENST00000520085; HG498050.1:1..707:ncRNA; NONHSAT101993	Havana transcript; lncRNAWiki; UCSC Genes; ENSEMBL; RNACentral; NONCODE	OTTHUMT00000372640; ENST00000520085	GO:0002031; GO:0006281; GO:0006283; GO:0006289; GO:0006355; GO:0006360; GO:0006361; GO:0006362; GO:0006363; GO:0006366; GO:0006367; GO:0006368; GO:0006370; GO:0006412; GO:0006468; GO:0009411; GO:0010467; GO:0016032; GO:0033683; GO:0040029; GO:0045814; GO:0050434; GO:0070911; GO:0006351; GO:0006974	OTTHUMT00000372640; ENST00000520085	GO:0000439; GO:0005654; GO:0005675; GO:0005634	OTTHUMT00000372640; ENST00000520085	GO:0003676; GO:0003700; GO:0004672; GO:0005515; GO:0008094; GO:0008135; GO:0008270; GO:0008353; GO:0047485; GO:0046872	OTTHUMT00000372640; ENST00000520085	GenMAPP	RNA_transcription_Reactome	main	NonCoding	Hs05045248_g1
TC0600007012.hg.1	8.6	7.2	2.62	2.62	1	1	8.6	7.2	CD83	CD83 molecule	chr6	+	Multiple_Complex	14117256	14136918	NM_001040280; NM_001251901; NM_004233; ENST00000379153; ENST00000612003; BC030830; OTTHUMT00000039916; CCDS4532.1; CCDS75403.1; uc003nbi.4; uc021ylz.2; chr6_14131750_14136140	RefSeq; ENSEMBL; GenBank; Havana transcript; ccdsGene; UCSC Genes; Guo	NM_001040280; NM_001251901; NM_004233; ENST00000379153; ENST00000612003; BC030830; OTTHUMT00000039916	GO:0001817; GO:0006952; GO:0006959; GO:0007165; GO:0014070; GO:0032713; GO:0032733; GO:0032743; GO:0043372	NM_001040280; NM_001251901; NM_004233; ENST00000379153; ENST00000612003; BC030830; OTTHUMT00000039916	GO:0005886; GO:0005887; GO:0009897; GO:0016020; GO:0016021	ENST00000379153; ENST00000612003	GO:0005515				main	Multiple_Complex	Hs00188486_m1
TC0600007265.hg.1	4.96	3.58	2.62	2.62	1	1	4.96	3.58	HIST1H3C	histone cluster 1, H3c	chr6	+	Coding	26045411	26045869	NM_003531; ENST00000612966; BC127610; OTTHUMT00000040078; BC160079; CCDS4576.1; uc003nfv.4	RefSeq; ENSEMBL; GenBank; Havana transcript; ccdsGene; UCSC Genes	NM_003531; ENST00000612966; BC127610; OTTHUMT00000040078	GO:0000183; GO:0002230; GO:0006325; GO:0006334; GO:0006335; GO:0007264; GO:0007596; GO:0010467; GO:0031047; GO:0032776; GO:0040029; GO:0044267; GO:0045814; GO:0051290; GO:0060968; GO:0098792	NM_003531; ENST00000612966; BC127610; OTTHUMT00000040078	GO:0000228; GO:0000786; GO:0000788; GO:0005576; GO:0005634; GO:0005654; GO:0016020; GO:0043234; GO:0070062; GO:0005694	NM_003531; ENST00000612966; BC127610; OTTHUMT00000040078	GO:0003677; GO:0005515; GO:0042393; GO:0046982				main	Coding	Hs04187427_sH
TC0X00008235.hg.1	6.11	7.5	-2.62	2.62	1	1	6.11	7.5	LONRF3	LON peptidase N-terminal domain and ring finger 3	chrX	+	Multiple_Complex	118974614	119018355	NM_001031855; NM_001289109; NM_024778; NR_110311; ENST00000304778; ENST00000371628; ENST00000422289; ENST00000439603; ENST00000472173; ENST00000481285; BC099847; BC100671; BC103491; OTTHUMT00000058016; OTTHUMT00000058017; OTTHUMT00000058018; OTTHUMT00000355124; CCDS14575.1; CCDS35374.1; CCDS76014.1; uc004eqw.5; uc004eqx.4; uc004eqz.4; uc065avp.1; uc065avq.1; uc065avr.1	RefSeq; ENSEMBL; GenBank; Havana transcript; ccdsGene; UCSC Genes	NM_001031855; NM_001289109; NM_024778; NR_110311; ENST00000304778; ENST00000371628; ENST00000422289; ENST00000439603; ENST00000472173; ENST00000481285; BC099847; BC100671; BC103491; OTTHUMT00000058016; OTTHUMT00000058017; OTTHUMT00000058018; OTTHUMT00000355124	GO:0006508			NM_001031855; NM_001289109; NM_024778; NR_110311; ENST00000304778; ENST00000371628; ENST00000422289; ENST00000439603; ENST00000472173; ENST00000481285; BC099847; BC100671; BC103491; OTTHUMT00000058016; OTTHUMT00000058017; OTTHUMT00000058018; OTTHUMT00000355124	GO:0004176; GO:0005515; GO:0008270; GO:0046872				main	Multiple_Complex	Hs00983071_m1
TC1200010835.hg.1	9.88	11.27	-2.62	2.62	1	1	9.88	11.27	NFE2	nuclear factor, erythroid 2	chr12	-	Multiple_Complex	54292107	54301121	NM_001136023; NM_001261461; NM_006163; ENST00000312156; ENST00000435572; ENST00000540264; ENST00000553070; ENST00000553198; BC005044; OTTHUMT00000405745; OTTHUMT00000405746; OTTHUMT00000405747; OTTHUMT00000405748; OTTHUMT00000405749; CCDS8876.1; hsa_circ_0026720; hsa_circ_0026721; NFE2.dAug10; uc001sfq.5; uc001sfr.6; uc009znk.5; uc009znl.5; uc058ovy.1	RefSeq; ENSEMBL; GenBank; Havana transcript; ccdsGene; circbase; Ace View; UCSC Genes	NM_001136023; NM_001261461; NM_006163; ENST00000312156; ENST00000435572; ENST00000540264; ENST00000553070; ENST00000553198; BC005044; OTTHUMT00000405745; OTTHUMT00000405746; OTTHUMT00000405747; OTTHUMT00000405748; OTTHUMT00000405749	GO:0006337; GO:0006351; GO:0006357; GO:0007275; GO:0007596; GO:0007599; GO:0008015; GO:0045893; GO:0006355; GO:0007267; GO:0030502; GO:0034242; GO:0060716; GO:2000758	NM_001136023; NM_001261461; NM_006163; ENST00000312156; ENST00000435572; ENST00000540264; ENST00000553070; ENST00000553198; BC005044; OTTHUMT00000405745; OTTHUMT00000405746; OTTHUMT00000405747; OTTHUMT00000405748; OTTHUMT00000405749	GO:0005634; GO:0005654; GO:0005737; GO:0015629; GO:0016605	NM_001136023; NM_001261461; NM_006163; ENST00000312156; ENST00000435572; ENST00000540264; ENST00000553070; ENST00000553198; BC005044; OTTHUMT00000405745; OTTHUMT00000405746; OTTHUMT00000405747; OTTHUMT00000405748; OTTHUMT00000405749	GO:0000976; GO:0003700; GO:0003713; GO:0005515; GO:0043565; GO:0047485; GO:0050699; GO:0003677				main	Multiple_Complex	Hs00232351_m1
TC1600006826.hg.1	6.25	7.64	-2.62	2.62	1	1	6.25	7.64	ABAT	4-aminobutyrate aminotransferase	chr16	+	Multiple_Complex	8674565	8784575	NM_000663; NM_001127448; NM_020686; ENST00000268251; ENST00000396600; ENST00000425191; ENST00000561870; ENST00000562115; ENST00000563215; ENST00000563992; ENST00000564453; ENST00000564714; ENST00000565016; ENST00000565671; ENST00000566590; ENST00000567812; ENST00000568847; ENST00000569156; ENST00000569695; BC015628; BC031413; OTTHUMT00000109648; OTTHUMT00000433612; OTTHUMT00000433613; OTTHUMT0000…	RefSeq; ENSEMBL; GenBank; Havana transcript; UCSC Genes; Ace View; ccdsGene; circbase; lncRNAWiki; NONCODE			NM_000663; NM_001127448; NM_020686; ENST00000268251; ENST00000396600; ENST00000425191; ENST00000561870; ENST00000562115; ENST00000563215; ENST00000563992; ENST00000564453; ENST00000564714; ENST00000565016; ENST00000565671; ENST00000566590; ENST00000567812; ENST00000568847; ENST00000569156; ENST00000569695; BC015628; BC031413; OTTHUMT00000109648; OTTHUMT00000433612; OTTHUMT00000433613; OTTHUMT0000…	GO:0005739; GO:0005759; GO:0032144; GO:0043005; GO:0070062			NM_000663; BC015628	HumanCyc; MetaCyc	GLUDEG-I-PWY; BETA-ALA-DEGRADATION-I-PWY; YEAST-4AMINOBUTMETAB-PWY; 4AMINOBUTMETAB-PWY; VALDEG-PWY	main	Multiple_Complex	Hs00609439_m1
TC1900006522.hg.1	10.8	12.19	-2.62	2.62	1	1	10.8	12.19	MIDN	midnolin	chr19	+	Multiple_Complex	1248553	1259143	NM_177401; ENST00000300952; ENST00000586757; ENST00000586843; ENST00000590136; ENST00000591302; ENST00000591446; BC094778; OTTHUMT00000449964; OTTHUMT00000449965; OTTHUMT00000449966; OTTHUMT00000449967; OTTHUMT00000449968; CCDS32864.1; hsa_circ_0048210; hsa_circ_0048211; MIDN.aAug10; uc002lrp.4; uc060qxb.1; uc060qxc.1; uc060qxd.1; uc060qxe.1; uc060qxf.1; NONHSAT060241; NONHSAT060242	RefSeq; ENSEMBL; GenBank; Havana transcript; ccdsGene; circbase; Ace View; UCSC Genes; lncRNAWiki; NONCODE	NM_177401; ENST00000300952; ENST00000586757; ENST00000586843; ENST00000590136; ENST00000591302; ENST00000591446; BC094778; OTTHUMT00000449964; OTTHUMT00000449965; OTTHUMT00000449966; OTTHUMT00000449967; OTTHUMT00000449968	GO:0033132; GO:0046676	NM_177401; ENST00000300952; ENST00000586757; ENST00000586843; ENST00000590136; ENST00000591302; ENST00000591446; BC094778; OTTHUMT00000449964; OTTHUMT00000449965; OTTHUMT00000449966; OTTHUMT00000449967; OTTHUMT00000449968	GO:0005730; GO:0005829; GO:0005634	NM_177401; ENST00000300952; ENST00000586757; ENST00000586843; ENST00000590136; ENST00000591302; ENST00000591446; BC094778; OTTHUMT00000449964; OTTHUMT00000449965; OTTHUMT00000449966; OTTHUMT00000449967; OTTHUMT00000449968	GO:0019900; GO:0005515				main	Multiple_Complex	Hs00997803_g1
TC1900011399.hg.1	11.94	13.33	-2.62	2.62	1	1	11.94	13.33	MBOAT7	membrane bound O-acyltransferase domain containing 7	chr19	-	Multiple_Complex	54173412	54189882	NM_024298; ENST00000245615; ENST00000338624; ENST00000391754; ENST00000414665; ENST00000431666; ENST00000437868; ENST00000449249; ENST00000453320; ENST00000464098; ENST00000474910; ENST00000491216; ENST00000494142; ENST00000495279; ENST00000495968; BC003164; BC006309; BC015857; OTTHUMT00000142203; OTTHUMT00000142204; OTTHUMT00000142205; OTTHUMT00000142206; OTTHUMT00000142207; OTTHUMT00000142208; …	RefSeq; ENSEMBL; GenBank; Havana transcript; ccdsGene; circbase; Ace View; UCSC Genes; lncRNAWiki; NONCODE			NM_024298; ENST00000245615; ENST00000338624; ENST00000391754; ENST00000414665; ENST00000431666; ENST00000437868; ENST00000449249; ENST00000453320; ENST00000464098; ENST00000474910; ENST00000491216; ENST00000494142; ENST00000495279; ENST00000495968; BC003164; BC006309; BC015857; OTTHUMT00000142203; OTTHUMT00000142204; OTTHUMT00000142205; OTTHUMT00000142206; OTTHUMT00000142207; OTTHUMT00000142208; …	GO:0005789; GO:0016020; GO:0016021	NM_024298; ENST00000245615; ENST00000338624; ENST00000391754; ENST00000414665; ENST00000431666; ENST00000437868; ENST00000449249; ENST00000453320; ENST00000464098; ENST00000474910; ENST00000491216; ENST00000494142; ENST00000495279; ENST00000495968; BC003164; BC006309; BC015857; OTTHUMT00000142203; OTTHUMT00000142204; OTTHUMT00000142205; OTTHUMT00000142206; OTTHUMT00000142207; OTTHUMT00000142208; …	GO:0005515; GO:0071617; GO:0016740; GO:0016746; GO:0016747				main	Multiple_Complex	Hs00383302_m1
TC0100008779.hg.1	6.31	7.69	-2.61	2.61	1	1	6.31	7.69	ST6GALNAC3	ST6 (alpha-N-acetyl-neuraminyl-2,3-beta-galactosyl-1,3)-N-acetylgalactosaminide alpha-2,6-sialyltransferase 3	chr1	+	Multiple_Complex	76074704	76634601	NM_001160011; NM_152996; ENST00000328299; ENST00000464140; ENST00000621530; BC059363; OTTHUMT00000026501; OTTHUMT00000026502; CCDS672.1; uc001dhh.3; uc057hsm.1; uc057hsn.1; chr1_76775190_76779684	RefSeq; ENSEMBL; GenBank; Havana transcript; ccdsGene; UCSC Genes; Guo	NM_001160011; NM_152996; ENST00000328299; ENST00000464140; ENST00000621530; BC059363; OTTHUMT00000026501; OTTHUMT00000026502	GO:0001574; GO:0006488; GO:0006677; GO:0006687; GO:0009100; GO:0009311; GO:0016266; GO:0018279; GO:0043687; GO:0044267; GO:0097503; GO:0006486	NM_001160011; NM_152996; ENST00000328299; ENST00000464140; ENST00000621530; BC059363; OTTHUMT00000026501; OTTHUMT00000026502	GO:0000139; GO:0016021; GO:0005794; GO:0016020	NM_001160011; NM_152996; ENST00000328299; ENST00000464140; ENST00000621530; BC059363; OTTHUMT00000026501; OTTHUMT00000026502	GO:0001665; GO:0008373; GO:0016740; GO:0016757				main	Multiple_Complex	Hs00541761_m1
TC0200006476.hg.1	8.31	6.92	2.61	2.61	1	1	8.31	6.92	SNTG2	syntrophin, gamma 2	chr2	+	Multiple_Complex	950868	1367613	NM_018968; ENST00000308624; ENST00000407292; ENST00000450962; ENST00000452177; ENST00000463442; ENST00000467759; ENST00000471239; ENST00000472606; ENST00000475201; ENST00000489646; ENST00000494178; ENST00000498321; BC125251; OTTHUMT00000322407; OTTHUMT00000322454; OTTHUMT00000322455; OTTHUMT00000322456; OTTHUMT00000322457; OTTHUMT00000322458; OTTHUMT00000322459; OTTHUMT00000322460; OTTHUMT0000032…	RefSeq; ENSEMBL; GenBank; Havana transcript; ccdsGene; circbase; Ace View; UCSC Genes; lncRNAWiki; NONCODE	NM_018968; ENST00000308624; ENST00000407292; ENST00000450962; ENST00000452177; ENST00000463442; ENST00000467759; ENST00000471239; ENST00000472606; ENST00000475201; ENST00000489646; ENST00000494178; ENST00000498321; BC125251; OTTHUMT00000322407; OTTHUMT00000322454; OTTHUMT00000322455; OTTHUMT00000322456; OTTHUMT00000322457; OTTHUMT00000322458; OTTHUMT00000322459; OTTHUMT00000322460; OTTHUMT0000032…	GO:0007417	NM_018968; ENST00000308624; ENST00000407292; ENST00000450962; ENST00000452177; ENST00000463442; ENST00000467759; ENST00000471239; ENST00000472606; ENST00000475201; ENST00000489646; ENST00000494178; ENST00000498321; BC125251; OTTHUMT00000322407; OTTHUMT00000322454; OTTHUMT00000322455; OTTHUMT00000322456; OTTHUMT00000322457; OTTHUMT00000322458; OTTHUMT00000322459; OTTHUMT00000322460; OTTHUMT0000032…	GO:0005737; GO:0005856; GO:0016013; GO:0042383; GO:0005886; GO:0016020	NM_018968; ENST00000308624; ENST00000407292; ENST00000450962; ENST00000452177; ENST00000463442; ENST00000467759; ENST00000471239; ENST00000472606; ENST00000475201; ENST00000489646; ENST00000494178; ENST00000498321; BC125251; OTTHUMT00000322407; OTTHUMT00000322454; OTTHUMT00000322455; OTTHUMT00000322456; OTTHUMT00000322457; OTTHUMT00000322458; OTTHUMT00000322459; OTTHUMT00000322460; OTTHUMT0000032…	GO:0003779; GO:0005198; GO:0030165; GO:0097109; GO:0005515				main	Multiple_Complex	Hs00985425_m1
[truncated: 21,130 more rows]

## Sheet: Familia5_HyP
ID	H5 Avg (log2)	P5 Avg (log2)	Fold Change	ABS FC	P-val	FDR P-val	Abenitez1_P0	Abenitez2_P1	Gene Symbol	Description	Chromosome	Strand	Group	Start	Stop	mRNA Accession	mRNA Source	GO Biological Process Accession	GO Biological Process ID	GO Cellular Component Accession	GO Cellular Component ID	GO Molecular Function Accession	GO Molecular Function ID	Pathway Accession	Pathway Source	Pathway Name	category	locus type	Best_Coverage_TaqMan_Assay
[truncated: 21,448 more rows]

## Sheet: Familia5_AllConditions
ID	H5 Avg (log2)	M5 Avg (log2)	P5 Avg (log2)	M5 vs H5 Fold Change	P5 vs H5 Fold Change	Abenitez1_P0	Abenitez2_P1	Abenitez3_P2	Gene Symbol	Description	Chromosome	Strand	Group	Start	Stop	mRNA Accession	mRNA Source	GO Biological Process Accession	GO Biological Process ID	GO Cellular Component Accession	GO Cellular Component ID	GO Molecular Function Accession	GO Molecular Function ID	Pathway Accession	Pathway Source	Pathway Name	category	locus type	Best_Coverage_TaqMan_Assay
[truncated: 21,448 more rows]
